# Supplementary material for: Modular synthesis of unsymmetrical indolyl diketones from ynediones via sequential aza-Michael addition/C–H functionalization
Source: Royal Society of Chemistry journal article supplement (doi:10.1039/d4ob00946k), 2024-01-01
Supplement: d4ob00946k1.pdf [file d4ob00946k1.pdf]

## *Supporting Information*

# **Modular Synthesis of Unsymmetrical Indolyl diketones from Ynediones via Sequential *aza*-Micheal Addition/C-H Functionalization**

Abdul Naveed,<sup>a,b</sup> Debojyoti Bag,<sup>a,b,c</sup> Sanghapal D. Sawant<sup>a,b,c</sup>

<sup>a</sup>Natural Products and Medicinal Chemistry Division, CSIR-Indian Institute of Integrative Medicine, Canal Road, Jammu, Jammu & Kashmir, 180001, India. <sup>b</sup>Academy of Scientific and Innovative Research (AcSIR), Ghaziabad-201002, India. <sup>c</sup>Organic Chemistry Division, CSIR-National Chemical Laboratory, Dr. Homi Bhabha Road, Pune - 411008, India.

Correspondence to: sd.sawant@ncl.res.in

### **Table of Contents**

| <b>Contents</b>                              | <b>Page No.</b> |
|----------------------------------------------|-----------------|
| 1. General Methods.....                      | S-2             |
| 2. Synthesis of Starting Materials.....      | S-2             |
| 3. General Experimental Procedures.....      | S-3             |
| 4. Characterization data for compounds ..... | S-3             |
| 5. References.....                           | S-12            |
| 6. NMR Spectra.....                          | S-13            |

## 1. General Methods:

**Materials:** All glassware was oven-dried (90 °C). Unless mentioned, chemicals & solvents were purchased in high purity grade from commercial suppliers and used without further purification. 1,2-alkynyldiketones were prepared according known procedures previously reported.

**Chromatography:** Thin layer chromatography (TLC) carried out on Merck silica plates (60F-254) and components were visualized by observation under UV light or by treating the plates with p-anisaldehyde followed by heating. Silica gel chromatography was performed using silica gel (60-120 or 100-200 mesh).

**Characterization:** NMR spectra for characterization of compounds were recorded on Bruker Avance DPX FT-NMR 400 MHz instrument (<sup>1</sup>H) at 400 MHz and (<sup>13</sup>C) at 100 MHz respectively. <sup>19</sup>F NMR were recorded at 376 MHz Chemical shifts ( $\delta$ ) are reported in ppm, using the residual solvent peak in CDCl<sub>3</sub> ( $\delta$ H = 7.26 and  $\delta$ C 77.16 ppm) and DMSO-d<sub>6</sub> ( $\delta$ H = 2.50 and  $\delta$ C = 39.52 ppm) as internal reference and coupling constants (*J*) are given in hertz (Hz). The following abbreviations were used to explain the multiplicities: s = singlet, d = doublet, t = triplet, q = quartet, m = multiplet. High- Resolution Mass Spectra (HRMS) were recorded using Waters XEVO-G2-XS-Q-TOF mass spectrometer.

**Experimental details.** Unless mentioned, reactions were performed at refluxing temperature in 5 mL glass vial. Ynedione used in this study were synthesized following the previously known literature procedures. Solvent used for the reaction purpose are of commercial grade and used without further purification. N-protection of indole was done following the previously reported methods.

## 2. Synthesis of Starting Materials:

Ynedione used in this study were synthesized following the previously known literature procedure. <sup>[1]</sup> *N*-substituted indoles (1.0 equiv.) in dry THF (25 mL) were placed under argon atmosphere in a two-neck round-bottom flask, degassed with argon and cooled to 0 °C (water/ice) for 15 min. Then, oxalyl chloride (1.0 equiv.) was added dropwise to the reaction mixture maintaining the temperature 0 °C. The mixture was allowed to come to room temperature (water bath) and was stirred for 4 h. Then,

5 mol% CuI, 2.0 equiv. of terminal alkyne and dry triethylamine (4 equiv.) were successively added to the mixture and stirring at room temperature was continued for 12h. After complete conversion (product monitored by TLC) water was added, the phases were separated and the aqueous phase was extracted with dichloromethane. The combined organic. layers were dried with anhydrous sodium sulfate, concentrated and the residue was subjected to silica gel column chromatography by using petroleum ether/ethyl acetate to provide the desired ynedione.

### 3. General Experimental Procedure:

#### General procedure for the one-pot synthesis of indolyl-diketone (GP1):

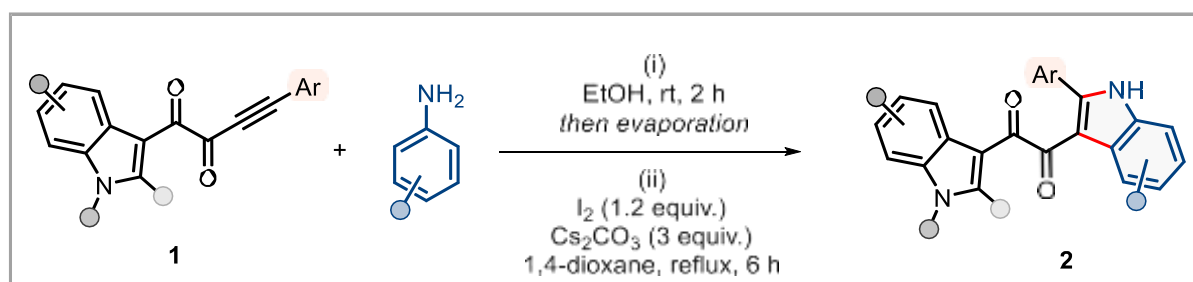

Aniline was added to the solution of indole-tethered ynedione **1** (1.0 equiv.) in ethanol, and the resulting mixture was stirred at room temperature for 2 h. After completion, ethanol was evaporated. The resulting mixture was redissolved in 1,4-dioxane followed by addition of 1.2 equiv. of iodine and 3 equiv. of Cs<sub>2</sub>CO<sub>3</sub>. The resulting mixture was stirred at a refluxing temperature for 6 hrs. Upon completion, the reaction mixture was concentrated under reduced pressure and directly subjected to silica gel column purification using ethyl acetate and petroleum ether as eluent.

### 4. Characterization Data of Synthesized Compounds:

#### 1-(4,6-dimethoxy-2-phenyl-1*H*-indol-3-yl)-2-(1-methyl-1*H*-indol-3-yl)ethane-1,2-

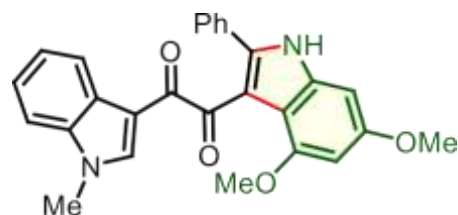

7.48-7.28 (m, 6H), 6.55 (d,  $J = 1.62$  Hz, 1H), 6.16 (d,  $J = 1.66$  Hz, 1H), 3.92 (s, 3H), 3.77 (s,

**dione (2a):** The title compound was isolated as a pale yellow solid (119 mg, 78% yield);  $R_f$ : 0.50 (30% ethyl acetate-petroleum ether); <sup>1</sup>H NMR (400 MHz, DMSO- *d*<sub>6</sub>)  $\delta$  12.09 (s, 1H), 8.22-8.16 (m, 2H), 7.73-7.66 (m, 2H),

3H), 3.08 (s, 3H), ppm;  $^{13}\text{C}\{^1\text{H}\}$  NMR (100 MHz, DMSO- $d_6$ )  $\delta$  192.2, 187.1, 158.5, 153.7, 142.7, 138.8, 137.4, 136.9, 131.5, 129.1, 129.0, 128.7, 128.5, 127.3, 123.5, 122.8, 112.5, 112.1, 111.2, 109.7, 94.0, 87.2, 55.7, 54.7, 33.7 ppm; HRMS (ESI): calcd. for  $\text{C}_{27}\text{H}_{23}\text{N}_2\text{O}_2[\text{M}+\text{H}]^+$ : 439.1658, found 439.1655.

**1-(5,7-dimethyl-2-phenyl-1H-indol-3-yl)-2-(1-methyl-1H-indol-3-yl)ethane-1,2-dione**

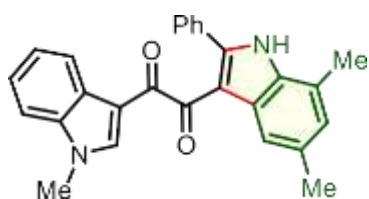

**(2b):** The title compound was isolated as a pale yellow solid (104 mg, 74% yield);  $R_f$ : 0.50 (30% ethyl acetate-petroleum ether);  $^1\text{H}$  NMR (400 MHz, DMSO- $d_6$ )  $\delta$  12.06 (s, 1H), 8.07 (s, 1H), 7.84-7.74 (m, 2H), 7.56-7.50 (m, 1H), 7.46-7.40 (m, 2H),

7.30-7.12 (m, 5H) 7.06-7.00 (m, 1H), 3.84 (s, 3H), 2.44 (s, 3H), 2.33 (s, 3H) ppm;  $^{13}\text{C}\{^1\text{H}\}$

NMR (100 MHz, DMSO- $d_6$ )  $\delta$  190.8, 189.0, 147.9, 139.8, 137.5, 136.2, 131.4, 131.0 130.2,

129.1, 127.7, 125.8, 125.5, 125.1, 123.4, 122.6, 121.3, 119.9, 118.1, 112.3, 110.9, 110.2, 33.4,

19.3, 13.45 ppm; HRMS (ESI): calcd. for  $\text{C}_{27}\text{H}_{23}\text{N}_2\text{O}_2[\text{M}+\text{H}]^+$ : 407.1760, found 407.1757.

**1-(6,7-dimethyl-2-phenyl-1H-indol-3-yl)-2-(1-methyl-1H-indol-3-yl) ethane-1,2-dione**

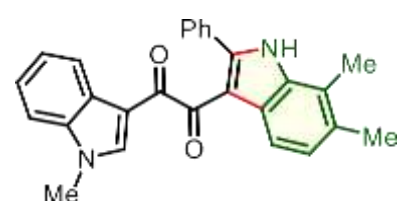

**(2c):** The title compound was isolated as a pale yellow solid (99 mg, 70% yield);  $R_f$ : 0.52 (30% ethyl acetate- petroleum ether);  $^1\text{H}$  NMR (400 MHz, DMSO- $d_6$ )  $\delta$  12.08 (s, 1H), 8.08 (s, 1H), 7.87-7.77 (m, 2H), 7.56-7.50 (m, 1H),

7.48-7.41 (m, 2H) 7.31-7.13 (m, 5H), 7.08-7.01 (m, 1H), 3.84 (s, 3H), 2.45 (s, 3H), 2.34 (s,

3H) ppm;  $^{13}\text{C}\{^1\text{H}\}$  NMR (100 MHz, DMSO- $d_6$ )  $\delta$  190.9, 189.0, 147.9, 139.8, 137.5, 136.2,

131.4, 131.0, 130.2, 129.1, 127.7, 125.8, 125.5, 125.2, 123.4, 122.6, 121.4, 119.9, 118.1, 112.4,

110.9, 110.3, 33.4, 19.3, 13.4 ppm; HRMS (ESI):calcd. for  $\text{C}_{27}\text{H}_{23}\text{N}_2\text{O}_2[\text{M}+\text{H}]^+$ : 407.1760,

found 407.1757.

**1-(5-methoxy-2-phenyl-1H-indol-3-yl)-2-(1-methyl-1H-indol-3-yl) ethane-1,2-dione**

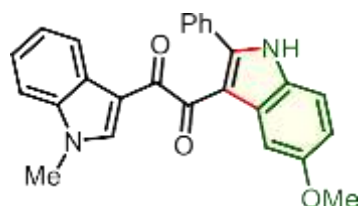

**(2d):** The title compound was isolated as a yellow solid (98 mg, 69% yield);  $R_f$ : 0.50 (30% ethyl acetate-petroleum ether);  $^1\text{H}$  NMR (400 MHz, DMSO- $d_6$ )  $\delta$  12.36 (s, 1H), 8.14 (s, 1H), 7.87-7.83 (m, 1H), 7.59-7.59 (m, 1H), 7.57-7.52 (m,

1H), 7.49-7.44 (m, 2H), 7.41-7.38 (m, 1H) 7.31-7.13 (m, 5H), 6.91 (dd,  $J = 8.75, 2.42$  Hz,

1H), 3.86 (s, 3H) 3.71 (s, 3H) ppm;  $^{13}\text{C}\{^1\text{H}\}$  NMR (100 MHz,  $\text{CDCl}_3$ )  $\delta$  190.9, 188.9, 156.6, 148.3, 139.2, 137.5, 131.2, 130.9, 129.2, 129.0, 128.9, 128.2, 126.5, 123.7, 122.9, 122.5, 113.9, 113.5, 113.1, 110.4, 109.7, 103.3, 55.8, 33.7 ppm; HRMS (ESI): calcd. for  $\text{C}_{26}\text{H}_{21}\text{N}_2\text{O}_3$   $[\text{M}+\text{H}]^+$ : 409.1552, found 409.1553.

**1-(1-methyl-1H-indol-3-yl)-2-(6-phenyl-5H-[1,3]dioxolo[4,5-f]indol-7-yl)ethane-1,2-**

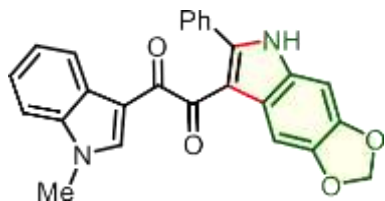

**dione (2e):** The title compound as off dark yellow solid (119 mg, 81% yield);  $R_f$ : 0.56 (30% ethyl acetate-petroleum ether);  $^1\text{H}$  NMR (400 MHz,  $\text{DMSO-d}_6$ )  $\delta$  12.31 (s, 1H), 8.13-8.12 (m, 1H), 7.86-7.84 (m, 1H), 7.58-7.51 (m, 1H), 7.45-7.44 (m, 3H), 7.31-7.12 (m, 5H), 7.00-6.99 (m, 1H), 6.02 (s, 2H), 3.86 (s, 3H) ppm;  $^{13}\text{C}\{^1\text{H}\}$  NMR (100 MHz,  $\text{DMSO-d}_6$ )  $\delta$  190.5, 188.6, 146.0, 145.2, 144.6, 140.0, 137.5, 131.4, 130.9, 129.6, 128.9, 127.8, 125.7, 123.4, 122.6, 121.5, 121.2, 112.2, 110.9, 109.9, 101.0, 99.8, 92.9, 33.4 ppm; HRMS (ESI): calcd. for  $\text{C}_{26}\text{H}_{19}\text{N}_2\text{O}_4$   $[\text{M}+\text{H}]^+$ : 423.1345, found 423.1346.

**1-(6,7-dimethyl-2-phenyl-1H-indol-3-yl)-2-(1-isopropyl-1H-indol-3-yl)ethane-1,2-**

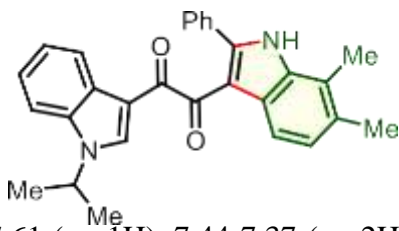

**dione (2f):** The title compound was isolated as a pale yellow solid (91 mg, 66% yield);  $R_f$ : 0.56 (30% ethyl acetate - petroleum ether);  $^1\text{H}$  NMR (400 MHz,  $\text{DMSO-d}_6$ )  $\delta$  12.04 (s, 1H), 8.07 (s, 1H), 7.83-7.77 (m, 2H), 7.66-7.61 (m, 1H), 7.44-7.37 (m, 2H), 7.29-7.23 (m, 1H), 7.18-7.13 (m, 2H), 7.10-7.03 (m, 3H), 4.85-4.79 (m, 1H) 2.44 (s, 3H), 2.34 (s, 3H), 2.49 (d,  $J = 6.55$  Hz, 6H) ppm;  $^{13}\text{C}\{^1\text{H}\}$  NMR (100 MHz,  $\text{CDCl}_3$ )  $\delta$  191.3, 188.0, 146.8, 136.5, 135.6, 134.0, 131.8, 131.6, 129.5, 129.3, 128.2, 126.8, 125.8, 125.6, 123.4, 122.9, 122.8, 119.3, 118.3, 113.8, 111.8, 109.9, 48.2, 22.6, 19.4, 13.2 ppm; HRMS (ESI): calcd. For  $\text{C}_{29}\text{H}_{27}\text{N}_2\text{O}_2$   $[\text{M}+\text{H}]^+$ : 435.2073, found 435.2057.

**1-(4,7-dimethyl-2-phenyl-1H-indol-3-yl)-2-(1-isopropyl-1H-indol-3-yl)ethane-1,2-**

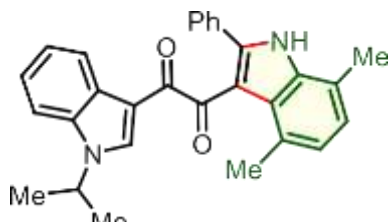

**dione (2g):** The title compound was isolated as a yellow solid (96 mg, 70% yield);  $R_f$ : 0.56 (30% ethyl acetate - petroleum ether);  $^1\text{H}$  NMR (400 MHz,  $\text{DMSO-d}_6$ )  $\delta$  11.99 (s, 1H), 8.24-8.23 (m, 1H), 7.82-7.79 (m, 1H), 7.63-7.60 (m, 1H), 7.40-7.39 (m, 2H), 7.26-7.21 (m, 1H), 7.15-7.10 (m, 1H), 7.00-6.88 (m, 5H), 4.87-4.80

(m, 1H), 3.35 (s, 3H), 2.55 (s, 3H), 1.55-1.52 (m, 6H) ppm;  $^{13}\text{C}\{^1\text{H}\}$  NMR (100 MHz,  $\text{CDCl}_3$ )  $\delta$  192.4, 187.1, 145.3, 136.2, 135.5, 134.1, 131.1, 129.8, 129.7, 128.9, 127.9, 127.1, 126.0, 124.5, 124.4, 123.2, 122.8, 122.7, 117.8, 114.7, 113.7, 109.8, 48.1, 22.6, 22.2, 16.4 ppm; HRMS (ESI): calcd. For  $\text{C}_{29}\text{H}_{27}\text{N}_2\text{O}_2[\text{M}+\text{H}]^+$ : 435.2073 found 435.2067.

**1-(1-isopropyl-1*H*-indol-3-yl)-2-(6-phenyl-5*H*-[1,3]dioxolo[4,5-*f*]indol-7-yl)ethane-**

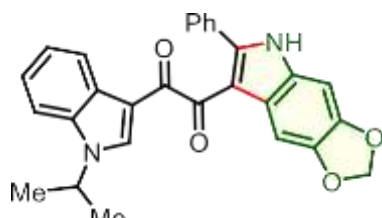

**1,2-dione (2h):** The title compound was isolated as a yellow solid (111 mg, 78% yield);  $R_f$  : 0.58 (30% ethyl acetate-petroleum ether);  $^1\text{H}$  NMR (400 MHz,  $\text{DMSO-d}_6$ )  $\delta$

12.27 (m, 1H), 8.13 (s, 1H), 7.87-7.77 (m, 1H), 7.68-7.61 (m, 1H), 7.56-7.46 (m, 1H), 7.45-7.36 (m, 2H), 7.30-7.24 (m, 1H), 7.18-6.99 (m, 5H), 6.03 (s, 2H), 4.85-4.82 (m, 1H), 1.49 (d,  $J = 5.98$  Hz, 6H) ppm;  $^{13}\text{C}\{^1\text{H}\}$  NMR (100 MHz,  $\text{DMSO-d}_6$ )  $\delta$  190.6, 188.6, 145.9, 145.1, 144.5, 136.1, 135.1, 131.2, 130.8, 129.6, 128.8, 127.6, 125.8, 123.2, 122.4, 121.4, 121.3, 112.7, 111.0, 110.2, 100.9, 99.7, 92.8, 47.9, 22.0 ppm; HRMS (ESI): calcd. For  $\text{C}_{28}\text{H}_{23}\text{N}_2\text{O}_4[\text{M}+\text{H}]^+$ : 451.1658, found 451.1650.

**1-(4,6-dimethoxy-2-phenyl-1*H*-indol-3-yl)-2-(1-isopropyl-1*H*-indol-3-yl)ethane-1,2-**

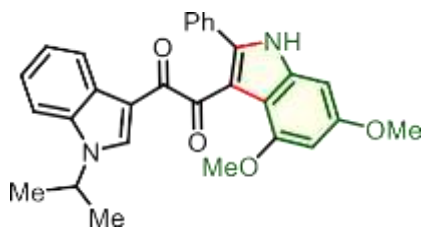

**dione (2i):** The title compound was isolated as a yellow solid (93 mg, 63% yield);  $R_f$  : 0.54 (30% ethyl acetate-petroleum ether);  $^1\text{H}$  NMR (400 MHz,  $\text{DMSO-d}_6$ )  $\delta$  12.08 (s, 1H), 8.22-8.15 (m, 1H), 7.71-7.68 (m, 3H), 7.48-7.39 (m,

3H), 7.33-7.23 (m, 3H), 6.55 (d,  $J = 1.75$ , 1H), 6.15 (d,  $J = 1.80$  Hz, 1H), 4.94-4.86 (m, 1H), 3.77 (s, 3H), 3.05 (s, 3H), 1.52 (d,  $J = 6.63$  Hz, 6H) ppm;  $^{13}\text{C}\{^1\text{H}\}$  NMR (100 MHz,  $\text{CDCl}_3$ )  $\delta$  192.5, 187.2, 158.5, 153.7, 142.5, 136.9, 136.3, 134.2, 131.5, 129.0, 128.6, 127.6, 123.2, 123.0, 122.7, 112.9, 112.1, 111.4, 110.0, 93.9, 87.1, 55.7, 54.6, 48.1, 22.7 ppm; HRMS (ESI): calcd. for  $\text{C}_{29}\text{H}_{27}\text{N}_2\text{O}_4[\text{M}+\text{H}]^+$ : 467.1971, found 467.1968.

**1-(1-allyl-1*H*-indol-3-yl)-2-(6,7-dimethyl-2-phenyl-1*H*-indol-3-yl)ethane-1,2-dione**

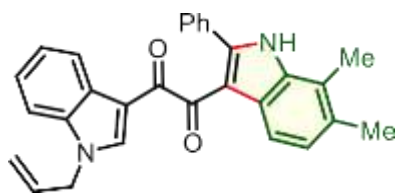

**(2j):** The title compound was isolated as a yellow solid (81 mg, 59% yield);  $R_f$  : 0.57 (30% ethyl acetate - petroleum ether);  $^1\text{H}$  NMR (400 MHz,  $\text{DMSO-d}_6$ )  $\delta$  12.07 (s, 1H), 8.07 (s, 1H), 7.86-7.76 (m, 2H), 7.54-7.48 (m, 1H),

7.44-7.37 (m, 2H), 7.29-7.16 (m, 3H), 7.14-7.03 (m, 3H), 6.06-5.96 (m, 1H) 5.20 (d,  $J = 10.33$  Hz, 1H) 5.03(d,  $J = 17.04$  Hz, 1H), 4.92-4.91 (m, 2H), 2.44 (s, 3H), 2.34 (s, 3H) ppm;  $^{13}\text{C}\{^1\text{H}\}$  NMR (100 MHz,  $\text{CDCl}_3$ )  $\delta$  191.2, 188.6, 146.8, 137.7, 136.9, 135.6, 131.9, 131.7, 129.5, 129.4, 128.3, 126.7, 125.9, 125.6, 123.6, 122.9, 122.8, 119.4, 118.8, 118.2, 113.9, 110.8, 49.6, 29.8, 19.4, 13.3 ppm; HRMS (ESI): calcd. For  $\text{C}_{29}\text{H}_{27}\text{N}_2\text{O}_2[\text{M}+\text{H}]^+$ : 433.1916, found 433.1894.

**1-(1-allyl-1H-indol-3-yl)-2-(4,7-dimethyl-2-phenyl-1H-indol-3-yl) ethane-1,2-dione**

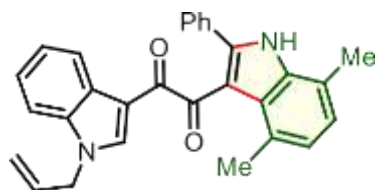

**(2k):** The title compound was isolated as a greenish yellow solid (106 mg, 77% yield);  $R_f$ : 0.57 (30% ethyl acetate - petroleum ether);  $^1\text{H}$  NMR (400 MHz,  $\text{DMSO-d}_6$ )  $\delta$  12.01 (s, 1H), 8.24 (s, 1H), 7.81-7.77 (m, 1H), 7.52-7.47 (m, 1H),

7.38-7.35 (m, 2H), 7.24-7.21 (m, 1H), 7.14-7.11 (m, 1H), 7.07-7.00 (m, 3H) 6.98-6.94 (m, 1H) 6.91-6.86 (m, 1H), 6.11-6.01 (m, 1H), 5.25 (dd,  $J = 10.36, 1.28$  Hz, 1H), 5.08 (dd,  $J = 17.05, 1.42$  Hz, 1H), 4.49 (d,  $J = 5.22$  Hz, 2H), 3.33 (s, 3H), 2.54 (s, 3H) ppm;  $^{13}\text{C}\{^1\text{H}\}$  NMR (100 MHz,  $\text{CDCl}_3$ )  $\delta$  192.1, 187.1, 145.5, 138.0, 136.6, 135.5, 133.5, 131.9, 129.9, 129.7, 129.1, 129.0, 128.1, 127.6, 127.0, 124.6, 124.5, 123.5, 122.8, 118.7, 117.8, 114.5, 113.7, 110.0, 49.5, 22.3, 16.4 ppm; HRMS (ESI): calcd. For  $\text{C}_{29}\text{H}_{25}\text{N}_2\text{O}_2[\text{M}+\text{H}]^+$ : 433.1916, found 433.1909.

**1-(1-allyl-1H-indol-3-yl)-2-(4,6-dimethoxy-2-phenyl-1H-indol-3-yl) ethane-1,2-dione**

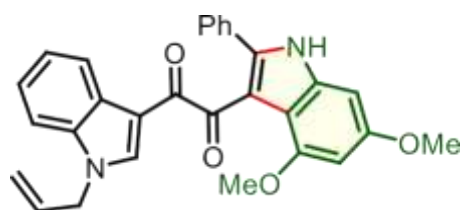

**(2l):** The title compound was isolated as a yellow solid (80 mg, 54% yield);  $R_f$  : 0.52 (30% ethyl acetate - petroleum ether);  $^1\text{H}$  NMR (400 MHz,  $\text{DMSO-d}_6$ )  $\delta$  12.11 (s, 1H), 8.23-8.19 (m, 2H), 7.74-7.67 (m, 2H),

7.62-7.56 (m, 1H), 7.48-7.43 (m, 3H), 7.32-7.25 (m, 2H), 6.56 (d,  $J = 1.68$  Hz, 1H), 6.16 (d,  $J = 1.70$  Hz, 1H) 6.10-6.00 (m, 1H), 5.20 (d,  $J = 10.36$  Hz, 1H), 5.06 (dd,  $J = 17.09, 1.16$  Hz, 1H), 4.95 (d,  $J = 5.07$  Hz, 2H), 3.77 (s, 3H), 3.08 (s, 3H) ppm;  $^{13}\text{C}\{^1\text{H}\}$  NMR (100 MHz,  $\text{CDCl}_3$ )  $\delta$  192.3, 187.4, 158.6, 153.7, 142.8, 138.0, 137.0, 136.8, 132.1, 131.6, 129.2, 129.1, 128.6, 127.6, 123.6, 123.0, 122.9, 118.8, 113.0, 112.2, 111.3, 110.3, 94.0, 87.3, 55.8, 54.8, 49.7 ppm; HRMS (ESI): calcd. for  $\text{C}_{29}\text{H}_{25}\text{N}_2\text{O}_4[\text{M}+\text{H}]^+$ : 465.1814, found 465.1807.

**1-(1-allyl-1*H*-indol-3-yl)-2-(6-phenyl-5*H*-[1,3]dioxolo[4,5-*f*]indol-7-yl)ethane-1,2-**

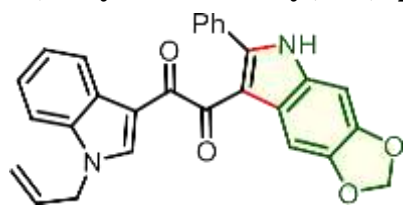

**dione (2m):** The title compound was isolated as a yellow solid (106 mg, 74% yield);  $R_f$ : 0.53 (30% ethyl acetate - petroleum ether);  $^1\text{H NMR}$  (400 MHz,  $\text{DMSO-}d_6$ )  $\delta$  12.31 (s, 1H), 8.12 (s, 1H), 7.82 (d,  $J = 7.74$  Hz, 1H), 7.53-7.49 (m,

2H), 7.44-7.36 (m, 2H), 7.28-7.08 (m, 5H), 6.99 (s, 1H), 6.07-5.99 (m, 3H), 5.20 (dd,  $J = 10.20$ , 1.03 Hz, 1H) 5.03 (dd,  $J = 17.10$ , 1.22 Hz, 1H), 4.93 (d,  $J = 5.72$  Hz, 2H) ppm;  $^{13}\text{C}\{^1\text{H}\}$  NMR (100 MHz,  $\text{DMSO-}d_6$ )  $\delta$  190.6 189.0, 146.3, 145.3, 144.7, 139.1, 136.7, 133.6, 131.3, 131.0, 129.7, 129.0, 127.9, 125.9, 123.6, 122.7, 121.4, 117.6, 112.7, 111.4, 110.1, 101.1, 99.9, 93.0, 48.8, ppm; HRMS (ESI): calcd. for  $\text{C}_{28}\text{H}_{21}\text{N}_2\text{O}_4$   $[\text{M}+\text{H}]^+$ : 449.1501, found 449.1497.

**1-(5-chloro-1-ethyl-1*H*-indol-3-yl)-2-(5,7-dimethyl-2-phenyl-1*H*-indol-3-yl)ethane-**

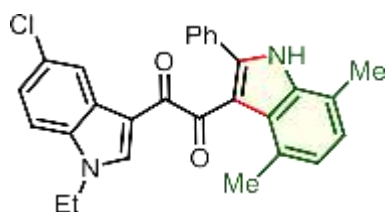

**1,2-dione (2n):** The title compound was isolated as a yellow solid (96 mg, 71% yield);  $R_f$ : 0.51 (30% ethyl acetate -petroleum ether);  $^1\text{H NMR}$  (400 MHz,  $\text{CDCl}_3$ )  $\delta$  12.06 (s, 1H), 8.31 (s, 1H), 7.70 (d,  $J = 1.88$  Hz, 1H), 7.66-7.59 (m,

1H), 7.40-7.32 (m, 2H), 7.26 (dd,  $J = 8.69$ , 1.93 Hz, 1H), 7.06-6.89 (m, 5H) 4.31(q,  $J = 7.17$  Hz, 2H), 2.57(s, 3H), 2.48 (s, 3H), 1.40 (t,  $J = 7.19$  Hz, 3H) ppm;  $^{13}\text{C}\{^1\text{H}\}$  NMR (100 MHz,  $\text{CDCl}_3$ )  $\delta$  191.8, 186.6, 145.6, 137.7, 135.5, 134.6, 131.6, 129.9, 129.7, 129.1, 128.7, 128.2, 128.1, 126.0, 124.7, 124.6, 123.8, 122.3, 117.8, 114.5, 113.2, 110.6, 42.1, 22.3, 16.4, 15.2 ppm; HRMS (ESI): calcd. for  $\text{C}_{28}\text{H}_{24}\text{N}_2\text{O}_2\text{Cl}$   $[\text{M}+\text{H}]^+$ : 455.1526, found 455.1526.

**1-(5-chloro-1-ethyl-1*H*-indol-3-yl)-2-(4,6-dimethoxy-2-phenyl-1*H*-indol-3-yl)ethane-**

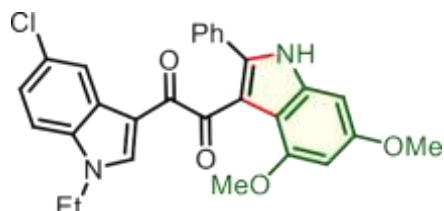

**1,2-dione (2o):** The title compound was isolated as a yellow solid (93 mg, 64% yield);  $R_f$  : 0.59 (30% ethyl acetate -petroleum ether);  $^1\text{H NMR}$  (400 MHz,  $\text{DMSO-}d_6$ )  $\delta$  12.14 (s, 1H), 8.34 (s, 1H), 8.13 (s, 1H), 7.72-7.69

(m, 3H), 7.48-7.42 (m, 3H), 7.36-7.32 (m, 1H), 6.56 (s, 1H ), 6.18 (s, 1H), 4.36 (q,  $J = 7.19$  Hz, 2H), 3.77 (s, 3H), 3.09 (s, 3H), 1.39 (t,  $J = 7.26$  Hz, 3H) ppm;  $^{13}\text{C}\{^1\text{H}\}$  NMR (100 MHz,  $\text{DMSO-}d_6$ )  $\delta$  191.2, 186.8, 157.6, 152.9, 142.4, 138.9, 137.0, 134.6, 131.4, 124.2, 128.7, 128.1, 127.7, 127.0, 123.0, 120.4, 112.7, 111.3, 111.2, 109.8, 93.3, 87.4, 55.4, 54.3, 41.4, 15.2 ppm; HRMS (ESI): calcd. for  $\text{C}_{28}\text{H}_{24}\text{N}_2\text{O}_4\text{Cl}$   $[\text{M}+\text{H}]^+$ : 487.1425, found 487.1418.



**1-(5-chloro-1-ethyl-1*H*-indol-3-yl)-2-(6-phenyl-5*H*-[1,3]dioxolo[4,5-*f*]indol-7-**

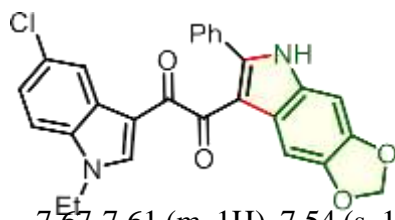

**yl)ethane-1,2-dione (2p):** The title compound was isolated as a greenish yellow solid (94 mg, 67% yield);  $R_f$ : 0.51 (30% ethyl acetate-petroleum ether);  $^1\text{H NMR}$  (400 MHz,  $\text{DMSO-d}_6$ )  $\delta$  12.32 (s, 1H), 8.21 (s, 1H), 7.71 (s, 1H), 7.67-7.61 (m, 1H), 7.54 (s, 1H), 7.36-7.28 (m, 3H), 7.20-7.14 (m, 1H), 7.11-7.04 (m, 2H), 6.99 (s, 1H), 6.04 (s, 2H), 4.29 (q,  $J = 7.16$  Hz, 2H) 1.36 (t,  $J = 7.14$  Hz, 3H) ppm;  $^{13}\text{C}\{^1\text{H}\}$  NMR (100 MHz,  $\text{DMSO-d}_6$ )  $\delta$  190.3, 188.4, 146.3, 145.2, 144.6, 139.5, 134.8, 131.2, 130.8, 129.6, 128.7, 127.6, 127.1, 126.9, 123.2, 121.4, 120.4, 112.6, 112.0, 110.1, 100.9, 99.8, 92.8, 41.5, 15.2 ppm; HRMS (ESI): calcd. for  $\text{C}_{27}\text{H}_{20}\text{N}_2\text{O}_4\text{Cl}[\text{M}+\text{H}]^+$ : 471.1112, found 471.1103.

**1-(5-bromo-1-ethyl-1*H*-indol-3-yl)-2-(5,7-dimethyl-2-phenyl-1*H*-indol-3-yl)ethane-**

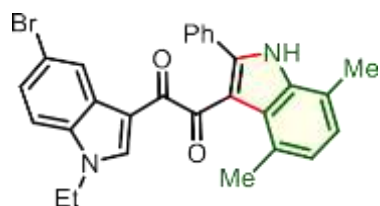

**1,2-dione (2q):** The title compound was isolated as a yellow solid (92 mg, 70% yield);  $R_f$ : 0.51 (30% ethyl acetate-petroleum ether);  $^1\text{H NMR}$  (400 MHz,  $\text{DMSO-d}_6$ )  $\delta$  12.07 (s, 1H), 8.31 (s, 1H), 7.87 (d,  $J = 1.81$  Hz, 1H), 7.62-7.59 (m, 1H), 7.04-7.35 (m, 3H), 7.06-6.91 (m, 5H), 4.32 (q,  $J = 7.20$  Hz, 2H), 2.59 (s, 3H), 2.51 (s, 3H), 1.41 (t,  $J = 7.14$  Hz, 3H) ppm;  $^{13}\text{C}\{^1\text{H}\}$  NMR (100 MHz,  $\text{DMSO-d}_6$ )  $\delta$  191.1, 187.4, 146.7, 139.6, 135.8, 134.7, 131.2, 130.4, 128.6, 128.1, 127.9, 127.3, 125.6, 125.5, 124.0, 123.4, 119.0, 115.0, 113.2, 112.9, 111.9, 41.5, 21.9, 16.7, 15.3 ppm; HRMS (ESI): calcd. for  $\text{C}_{28}\text{H}_{24}\text{N}_2\text{O}_2\text{Br}[\text{M}+\text{H}]^+$ : 499.1021, found 499.1020.

**1-(5-bromo-1-ethyl-1*H*-indol-3-yl)-2-(4,6-dimethoxy-2-phenyl-1*H*-indol-3-yl)ethane-**

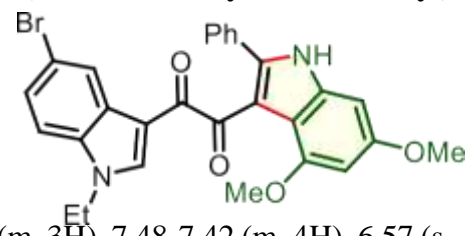

**1,2-dione (2r):** The title compound was isolated as a yellow solid (103 mg, 74% yield);  $R_f$ : 0.55 (30% ethyl acetate-petroleum ether);  $^1\text{H NMR}$  (400 MHz,  $\text{DMSO-d}_6$ )  $\delta$  12.14 (s, 1H), 8.32-8.29 (m, 2H), 7.71-7.65 (m, 3H), 7.48-7.42 (m, 4H), 6.57 (s, 1H), 6.19 (s, 1H), 4.37 (q,  $J = 6.98$  Hz, 2H), 3.77 (s, 3H), 3.09 (s, 3H), 1.38 (t,  $J = 7.12$  Hz, 3H) ppm;  $^{13}\text{C}\{^1\text{H}\}$  NMR (100 MHz,  $\text{CDCl}_3$ )  $\delta$  191.9, 187.0, 158.5, 153.5, 142.9, 137.6, 136.9, 153.1, 131.3, 129.0, 128.5, 126.4, 126.0, 125.4, 116.4, 112.2, 112.0, 111.3, 110.9, 94.0, 87.2, 55.7, 54.7, 42.1, 15.1 ppm; HRMS (ESI): calcd. for  $\text{C}_{28}\text{H}_{24}\text{N}_2\text{O}_4\text{Br}[\text{M}+\text{H}]^+$ : 531.0919, found 531.0916.

**1-(5-chloro-1-ethyl-1*H*-indol-3-yl)-2-(6-phenyl-5*H*-[1,3]dioxolo[4,5-*f*]indol-7-**

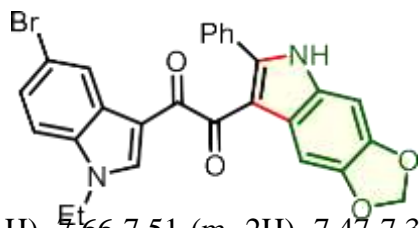

**yl)ethane-1,2-dione (2s):** The title compound was isolated as a yellow solid (100 mg, 74% yield);  $R_f$ : 0.51 (30% ethyl acetate-petroleum ether);  $^1\text{H NMR}$  (400 MHz,  $\text{DMSO-d}_6$ )  $\delta$  12.32 (s, 1H), 8.21 (s, 1H), 7.87 (s, 1H), 7.66-7.51 (m, 2H), 7.47-7.30 (m, 3H), 7.22-6.96 (m, 4H) 6.04 (s, 2H), 4.29 (q,  $J = 7.14$  Hz, 2H) 1.36 (t,  $J = 7.14$  Hz, 3H) ppm;  $^{13}\text{C}\{^1\text{H}\}$  NMR (100 MHz,  $\text{DMSO-d}_6$ )  $\delta$  190.3, 188.4, 146.3, 145.2, 144.6, 139.5, 134.8, 131.2, 130.8, 129.6, 128.7, 127.6, 127.1, 126.9, 123.2, 121.4, 120.4, 112.6, 112.0, 110.1, 100.9, 99.8, 92.8, 41.5, 15.2 ppm; HRMS (ESI): calcd. for  $\text{C}_{27}\text{H}_{20}\text{N}_2\text{O}_4^{79}\text{Br}[\text{M}+\text{H}]^+$ : 513.0450, found 513.0445.

**1-(1-ethyl-1*H*-indol-3-yl)-2-(2-(2-fluorophenyl)-4,7-dimethyl-1*H*-indol-3-yl)ethane-**

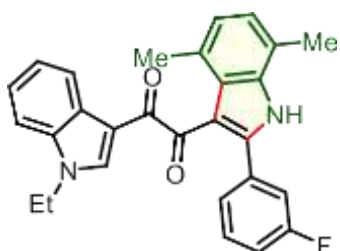

**1,2-dione (2t):** The title compound was isolated as a yellow solid (85 mg, 62% yield);  $R_f$ : 0.51 (30% ethyl acetate -petroleum ether);  $^1\text{H NMR}$  (400 MHz,  $\text{DMSO-d}_6$ )  $\delta$  12.08 (s, 1H), 8.30 (s, 1H), 7.82 (d,  $J = 7.60$  Hz, 1H), 7.65-7.51 (m, 1H), 7.27-6.83 (m, 8H), 4.31 (q,  $J = 7.09$  Hz, 2H), 2.57 (s, 3H), 2.49 (s, 3H), 1.41 (t,  $J = 6.82$  Hz, 3H) ppm;  $^{13}\text{C}\{^1\text{H}\}$  NMR (100 MHz,  $\text{DMSO-d}_6$ )  $\delta$  191.4, 187.3, 162.1 (d,  $J = 247.27$  Hz), 144.4, 138.8, 135.9, 133.3 (d,  $J = 8.32$  Hz), 133.4, 129.8, 129.78, 129.74, 127.0, 125.9, 125.3 (d,  $J = 2.82$  Hz), 124.68 (d,  $J = 5.59$  Hz), 123.5, 122.8, 122.7 (d,  $J = 10.85$  Hz), 116.9 (d,  $J = 22.70$  Hz), 115.8 (d,  $J = 21.04$  Hz), 114.9, 113.4, 110.0, 41.2, 21.8, 16.6, 15.1 ppm;  $^{19}\text{F}$  NMR (376 MHz,  $\text{DMSO-d}_6$ )  $\delta$  -133.2 ppm; HRMS (ESI): calcd. for  $\text{C}_{28}\text{H}_{24}\text{N}_2\text{O}_2\text{F} [\text{M}+\text{H}]^+$ : 439.1822, found 439.1813.

**1-(1-ethyl-1*H*-indol-3-yl)-2-(6-(2-fluorophenyl)-5*H*-[1,3]dioxolo[4,5-*f*]indol-7-**

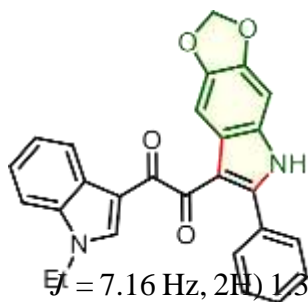

**yl)ethane-1,2-dione (2u):** The title compound was isolated as a yellow solid (96 mg, 68% yield);  $R_f$ : 0.51 (30% ethyl acetate -petroleum ether);  $^1\text{H NMR}$  (400 MHz,  $\text{DMSO-d}_6$ )  $\delta$  12.39 (s, 1H), 8.16 (s, 1H), 7.90-7.85 (m, 1H), 7.63-7.57 (m, 1H), 7.48 (s, 1H), 7.30-7.12 (m, 5H), 7.01-6.97 (m, 2H) 6.03 (s, 2H), 4.29 (q,  $J = 7.16$  Hz, 2H) 1.37 (t,  $J = 7.20$  Hz, 3H) ppm;  $^{13}\text{C}\{^1\text{H}\}$  NMR (100 MHz,  $\text{DMSO-d}_6$ )  $\delta$  190.7,

188.8, 161.3 (d,  $J = 244.15$  Hz), 145.2 (d,  $J = 70.15$  Hz), 144.3 (d,  $J = 1.91$  Hz), 138.7, 136.5, 133.4 (d,  $J = 8.44$  Hz), 131.0, 129.9 (d,  $J = 8.52$  Hz), 125.8 (t,  $J = 2.61$  Hz), 123.6, 122.7, 121.5, 121.4, 116.7 (d,  $J = 22.77$  Hz), 115.9, 115.8, 112.5, 111.0, 110.5, 101.1, 99.9, 93.0, 41.5, 15.3 ppm;  $^{19}\text{F}$  NMR (376 MHz, DMSO- $d_6$ )  $\delta$  -113.7 ppm; HRMS (ESI): calcd. for  $\text{C}_{27}\text{H}_{20}\text{N}_2\text{O}_4\text{F}$   $[\text{M}+\text{H}]^+$ : 455.1407, found 455.1400.

**1-(5-methoxythiophen-2-yl)-2-(6-phenyl-5H-[1,3]dioxolo[4,5-f]indol-7-yl)ethane-1,2-**

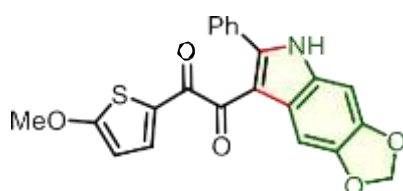

**dione (2v):** The title compound was isolated as a dark yellow solid (93 mg, 62% yield);  $R_f$ : 0.54 (30% ethyl acetate - petroleum ether);  $^1\text{H}$  NMR (400 MHz, DMSO- $d_6$ )  $\delta$  12.38 (s, 1H), 7.54-7.50 (m, 2H), 7.37-7.27 (m, 5H),

7.01-7.00 (m, 1H), 6.49-6.47 (m, 1H), 6.04 (s, 2H), 3.96 (s, 3H) ppm;  $^{13}\text{C}\{^1\text{H}\}$  NMR (100 MHz, DMSO- $d_6$ )  $\delta$  188.6, 185.4, 175.4, 146.6, 145.3, 144.7, 137.4, 130.9, 130.8, 129.7, 129.3, 127.9, 126.7, 121.2, 110.1, 107.2, 101.0, 99.7, 92.9, 61.0 ppm; HRMS (ESI): calcd. for  $\text{C}_{22}\text{H}_{16}\text{NO}_5\text{S}$   $[\text{M}+\text{H}]^+$ : 406.0749, found 406.0733.

**1-(4,6-dimethoxy-2-phenyl-1H-indol-3-yl)-2-(5-methoxythiophen-2-yl)ethane-1,2-**

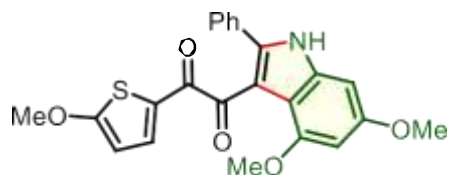

**dione (2w):** The title compound was isolated as a dark yellow solid (107 mg, 69% yield);  $R_f$ : 0.54 (30% ethyl acetate -petroleum ether);  $^1\text{H}$  NMR (400 MHz, DMSO- $d_6$ )  $\delta$  12.20 (s, 1H), 7.66-7.60 (m, 3H), 7.49-7.44

(m, 3H), 6.56-6.55 (m, 2H), 6.24 (s, 1H), 4.01 (s, 3H), 3.78 (s, 3H), 3.38 (s, 3H) ppm;  $^{13}\text{C}\{^1\text{H}\}$  NMR (100 MHz,  $\text{CDCl}_3$ )  $\delta$  190.0, 184.0, 175.3, 158.6, 153.6 143.0, 136.8, 136.4, 131.2, 129.2, 129.1, 128.5, 111.9, 110.8, 106.7, 94.0, 87.2, 60.6, 55.8, 54.8 ppm; HRMS (ESI): calcd. for  $\text{C}_{23}\text{H}_{20}\text{NO}_5\text{S}$   $[\text{M}+\text{H}]^+$ : 422.1062, found 422.1050.

**1-(4,7-dimethyl-2-phenyl-1H-indol-3-yl)-2-(1-methyl-1H-pyrrol-2-yl)ethane-1,2-dione (2x):**

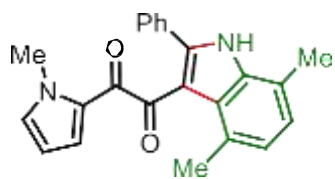

The title compound was isolated as a dark yellow solid (96 mg, 64% yield);  $R_f$ : 0.54 (30% ethyl acetate-petroleum ether);  $^1\text{H}$  NMR (400 MHz, DMSO- $d_6$ )  $\delta$  12.09 (s, 1H), 7.34 (t,  $J$  = 7.03 Hz, 1H), 7.24-7.17 (m, 5H), 7.08 (s, 1H), 6.98-6.90 (m, 2H),

6.81-6.80 (m, 1H), 6.10-6.08 (m, 1H), 3.30 (s, 3H), 2.64 (s, 3H), 2.45 (s, 3H) ppm;  $^{13}\text{C}\{^1\text{H}\}$

NMR (100 MHz, DMSO- d<sub>6</sub>)  $\delta$  189.8, 183.1, 147.6, 135.8, 132.6, 131.0, 130.5, 128.9, 128.4, 128.2, 126.9, 125.2, 124.2, 124.1, 122.5, 118.8, 113.2, 108.7, 36.3, 22.2, 16.5 ppm; HRMS (ESI): calcd. for C<sub>23</sub>H<sub>19</sub>N<sub>2</sub>O<sub>2</sub> [M-H]<sup>-</sup>: 355.1447, found 355.1439.

### 1-(4,6-dimethoxy-2-phenyl-1H-indol-3-yl)-2-(1-methyl-1H-pyrrol-2-yl)ethane-1,2-

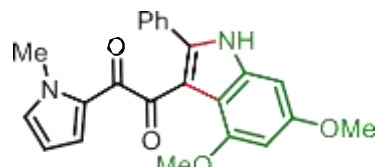

**dione (2y):** The title compound was isolated as a yellow solid (111 mg, 68% yield); R<sub>f</sub>: 0.54 (30% ethyl acetate - petroleum ether); <sup>1</sup>H NMR (400 MHz, DMSO-d<sub>6</sub>)  $\delta$  12.10 (s,

1H), 7.63 (d, *J* = 5.82 Hz, 2H), 7.45-7.44 (m, 2H), 7.25 (s, 2H), 6.87(s, 1H) 6.54 (s, 1H), 6.21-6.19 (m, 2H), 3.90 (s, 3H), 3.77 (s, 3H), 3.30 (s, 3H) ppm; <sup>13</sup>C{<sup>1</sup>H} NMR (100 MHz, DMSO-d<sub>6</sub>)  $\delta$  190.1, 182.6, 157.6, 153.0, 142.8, 137.0, 132.2, 131.4, 129.3, 128.7, 128.1, 127.8, 121.8, 111.0, 109.8, 108.6, 93.3, 87.4, 55.4, 54.5, 36.8 ppm; HRMS (ESI): calcd. for C<sub>23</sub>H<sub>19</sub>N<sub>2</sub>O<sub>4</sub> [M-H]<sup>-</sup>: 387.1335, found 387.1345.

## 5. References:

- [1] E. Merkul, J. Dohe, C. Gers, F. Rominger, T. J. J. Müller, *Angew. Chem. Int. Ed.* **2011**, *50*, 2966-2969.
- [2] D. Bag, S. D. Sawant, *Org. Lett.* **2022**, *24*, 27, 4930-4934.

## **6. NMR Spectra**

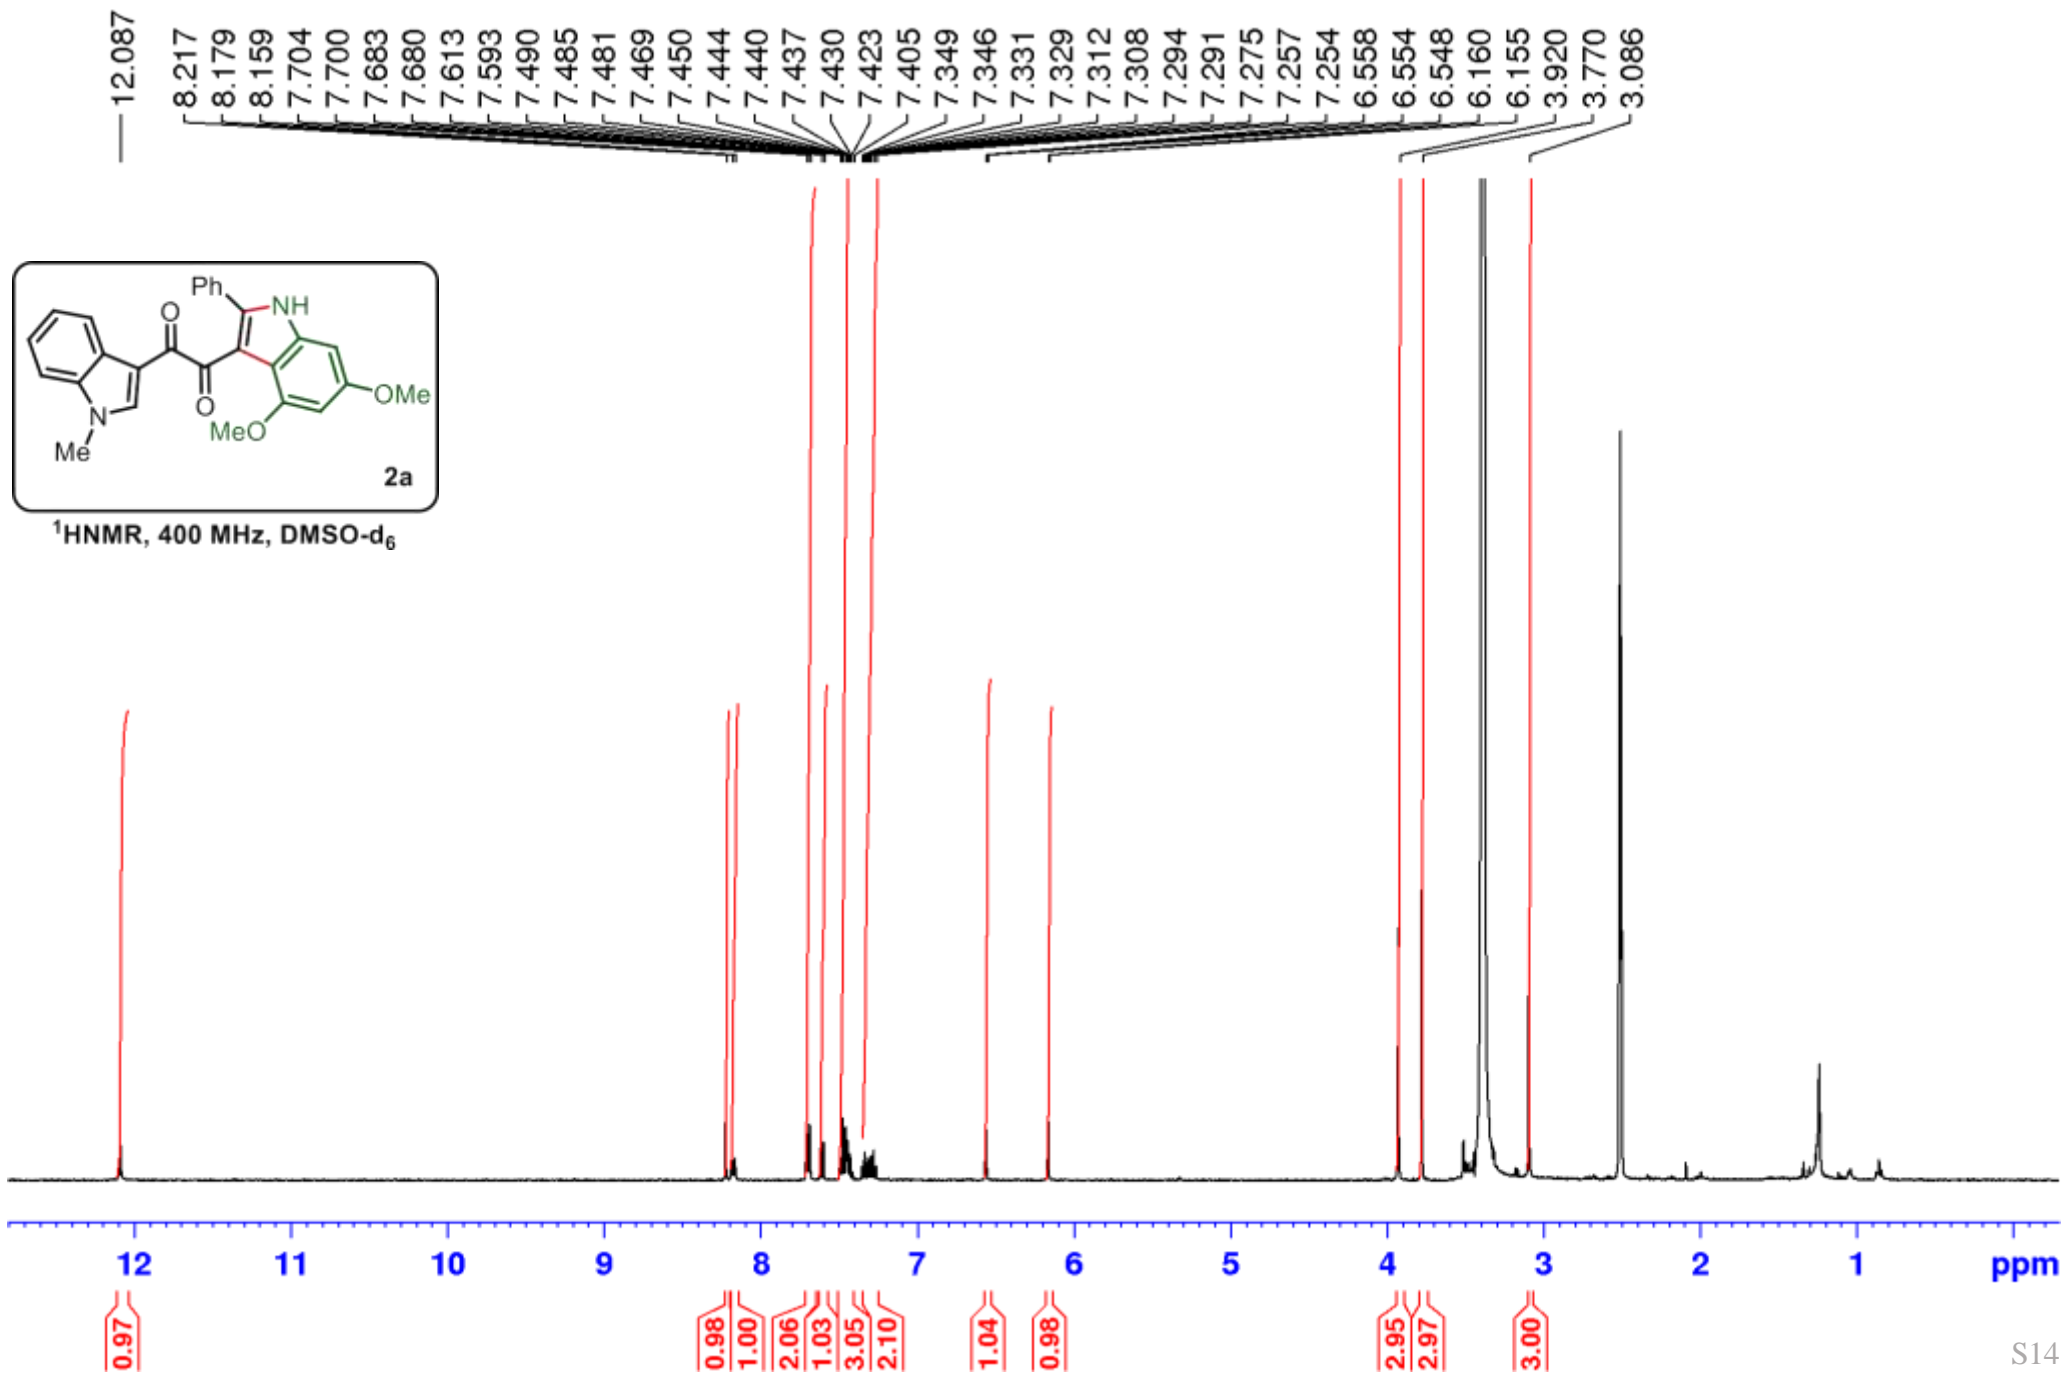

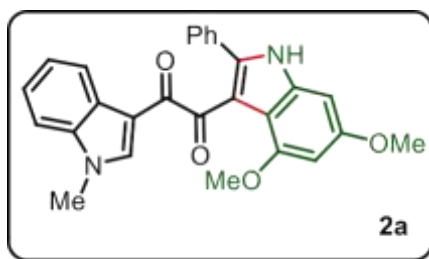

$^{13}\text{C}\{^1\text{H}\}$ NMR, 100 MHz,  $\text{CDCl}_3$

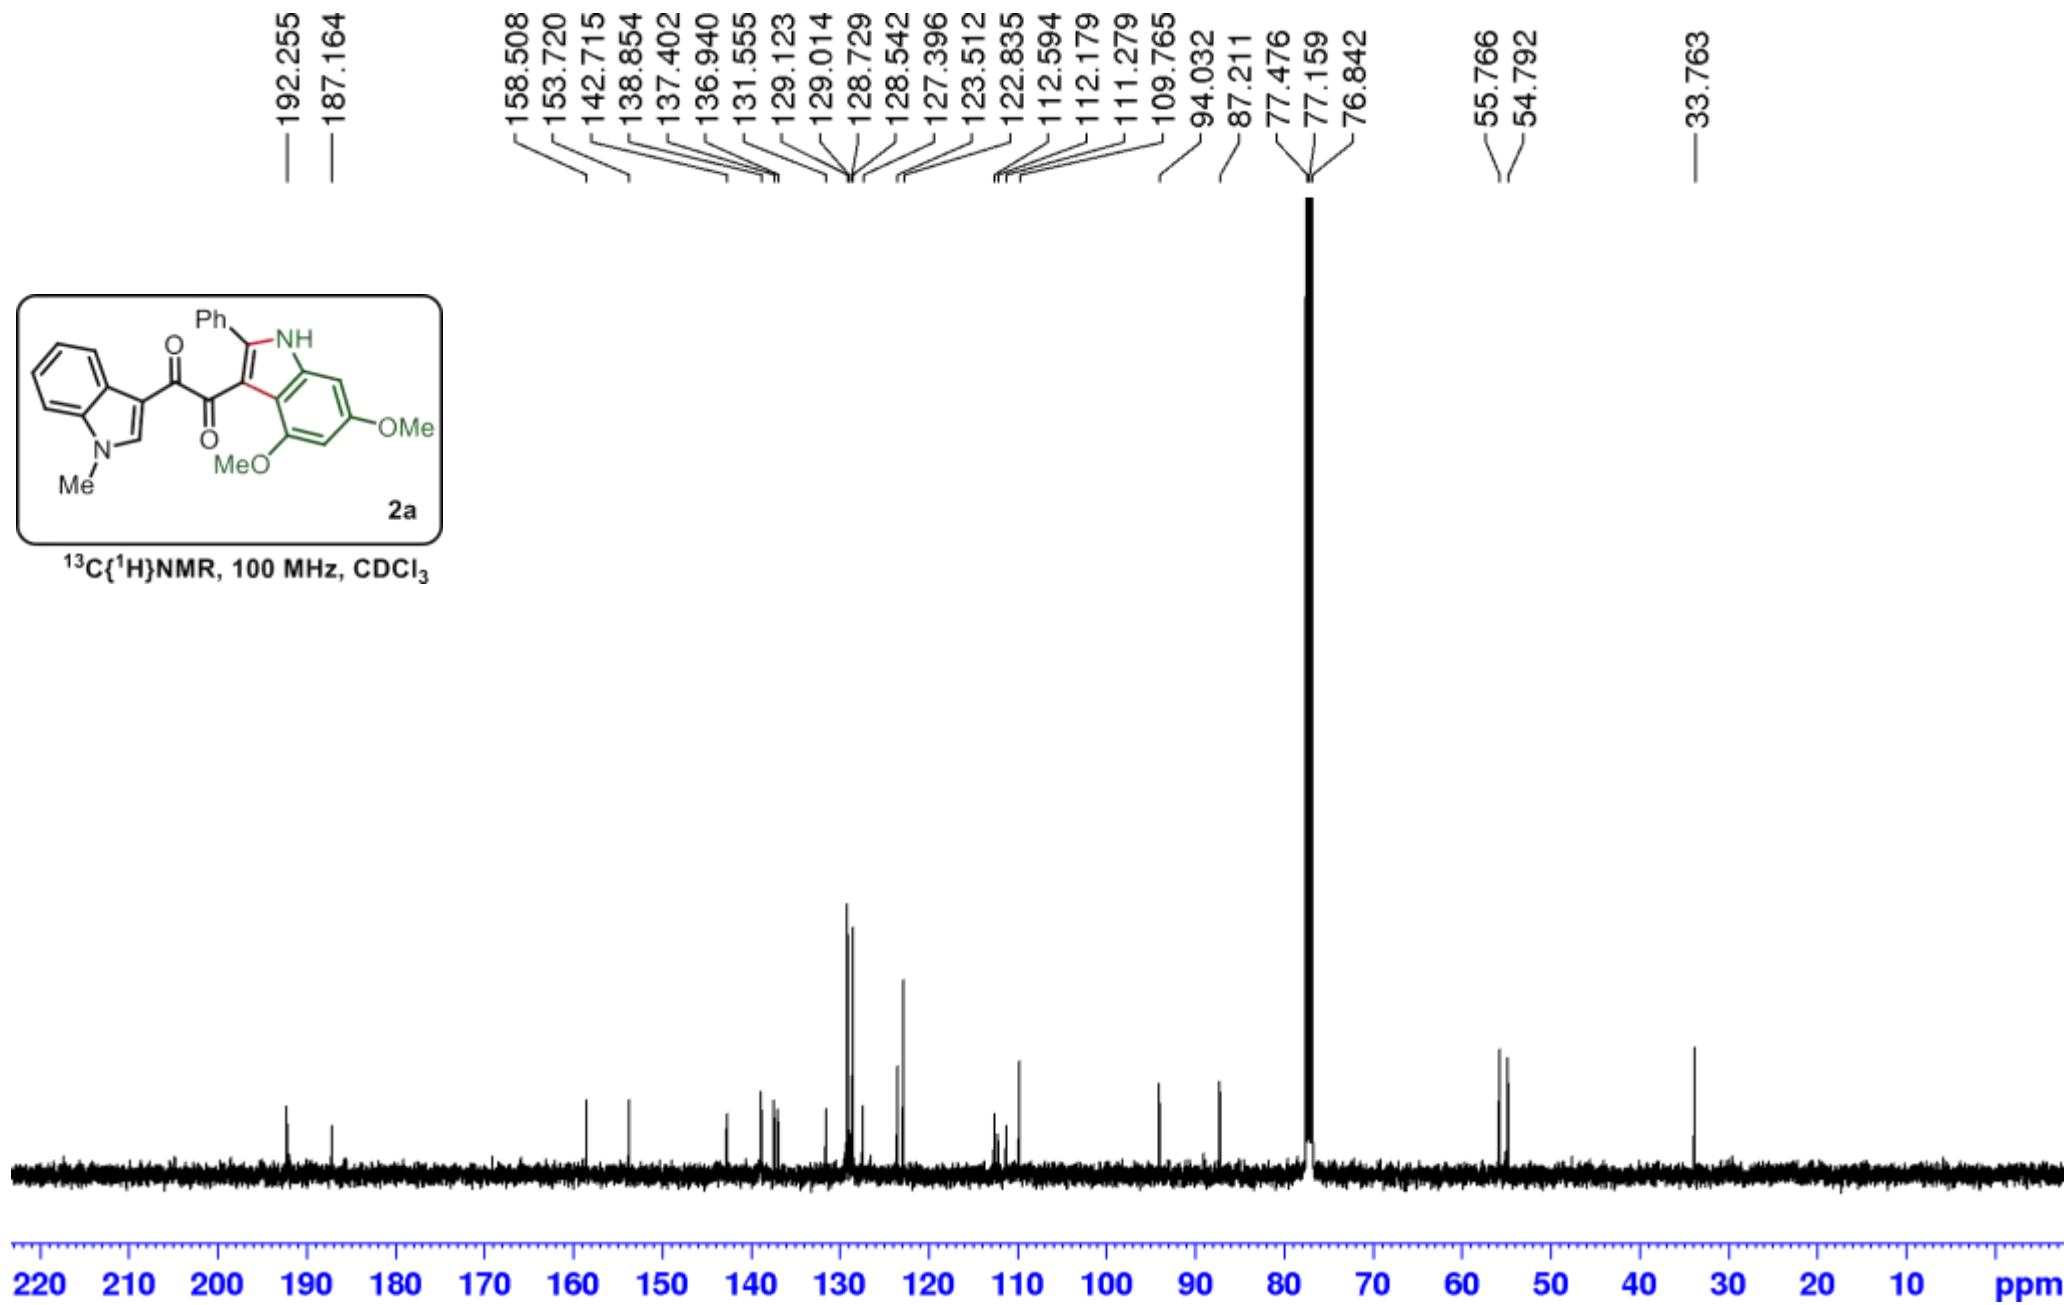

# Elemental Composition Report

## Single Mass Analysis

Tolerance = 100.0 PPM / DBE: min = -1.5, max = 50.0

Element prediction: Off

Number of isotope peaks used for i-FIT = 3

Monoisotopic Mass, Even Electron Ions

24 formula(e) evaluated with 1 results within limits (up to 3 closest results for each mass)

Elements Used:

C: 0-27 H: 0-100 N: 0-2 O: 0-4

NVD-41

QMI DIVISION, CSIR-IIIM JAMMU  
Xevo G2-XS QTOF YFC2015

13-Apr-2023  
12:47:58  
1: TOF MS ES+  
8.57e+006

130423\_09 6 (0.138)

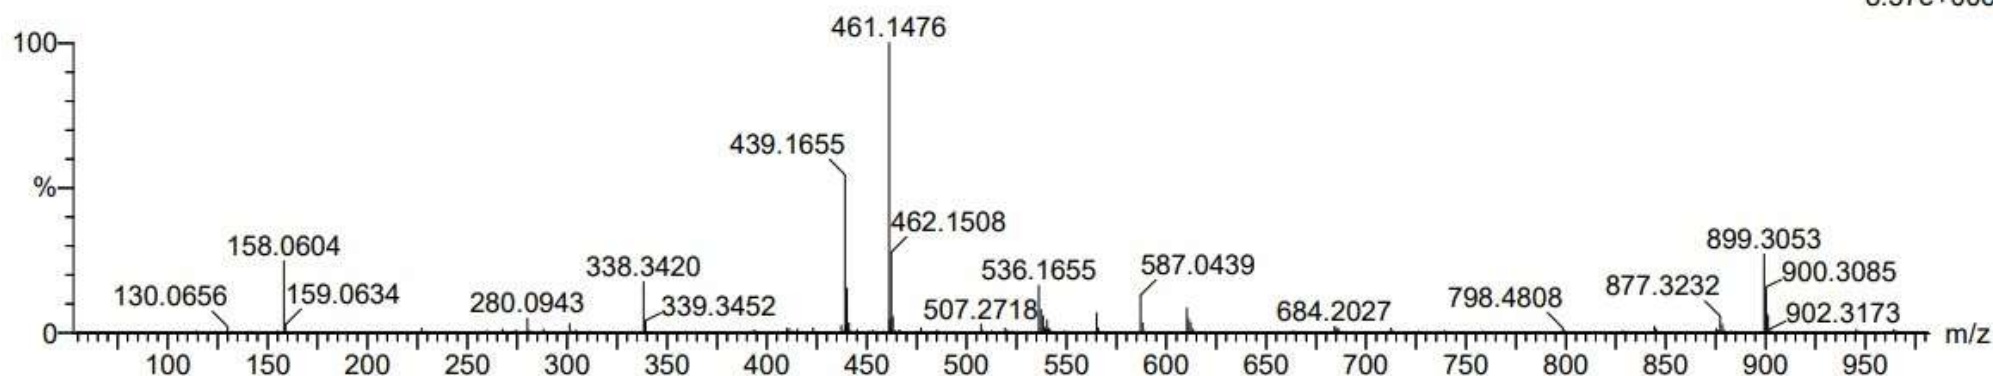

Minimum: -1.5  
Maximum: 2.0 100.0 50.0

| Mass     | Calc. Mass | mDa  | PPM  | DBE  | i-FIT | Norm | Conf (%) | Formula       |
|----------|------------|------|------|------|-------|------|----------|---------------|
| 439.1655 | 439.1658   | -0.3 | -0.7 | 17.5 | 919.9 | n/a  | n/a      | C27 H23 N2 O4 |



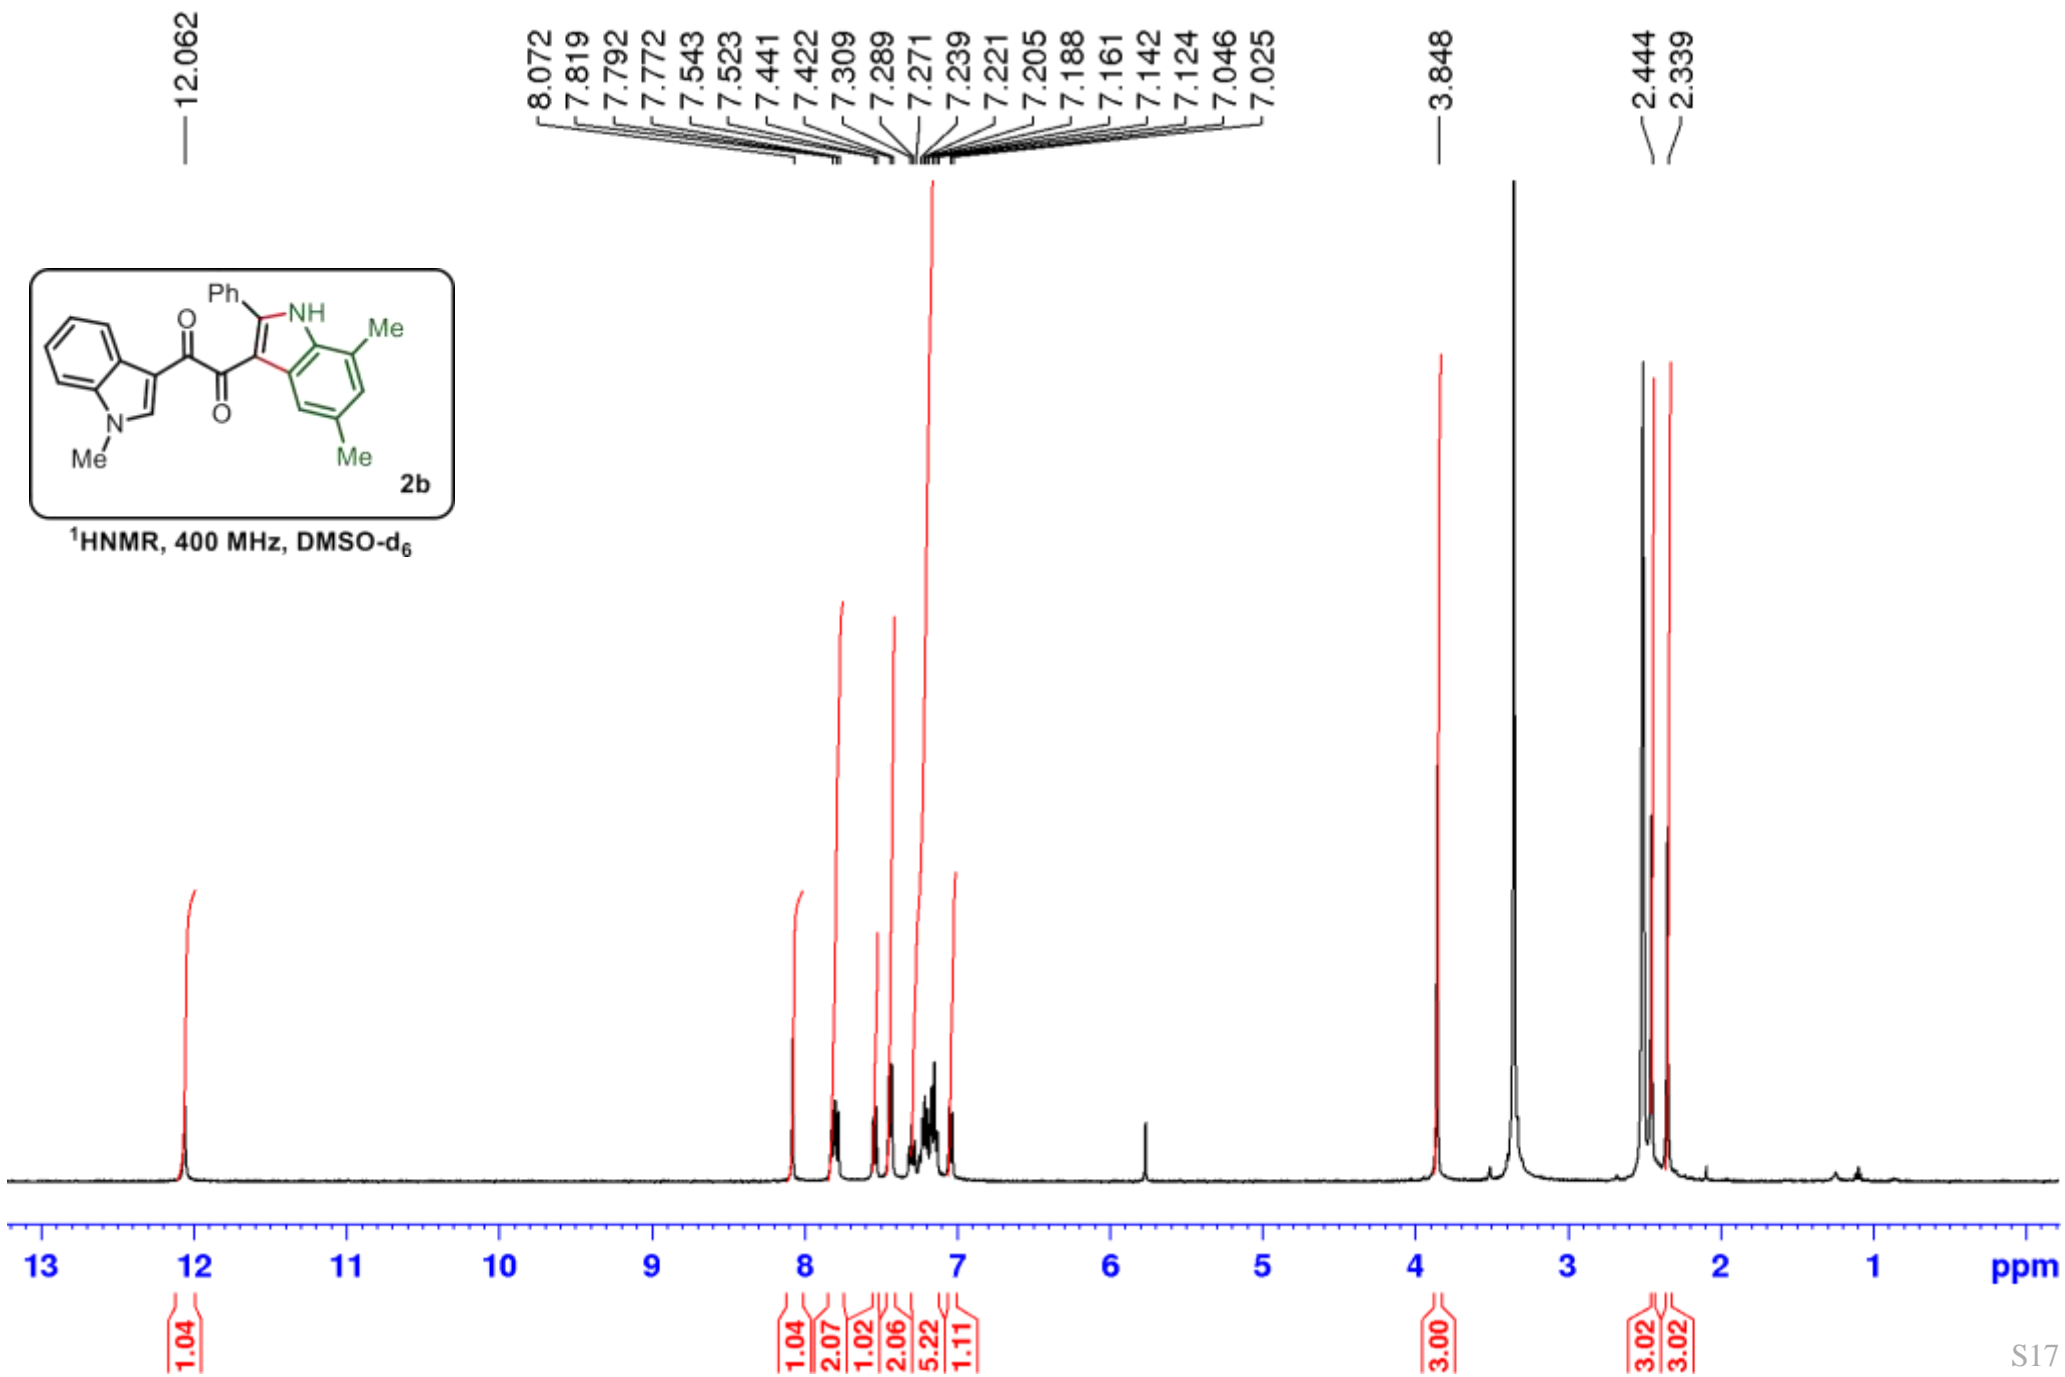

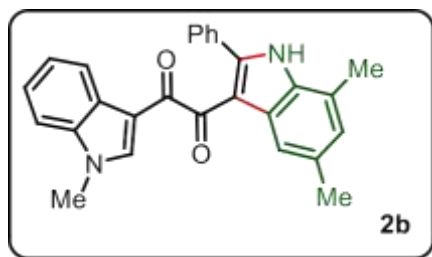

$^{13}\text{C}\{^1\text{H}\}$ NMR, 100 MHz, DMSO- $d_6$

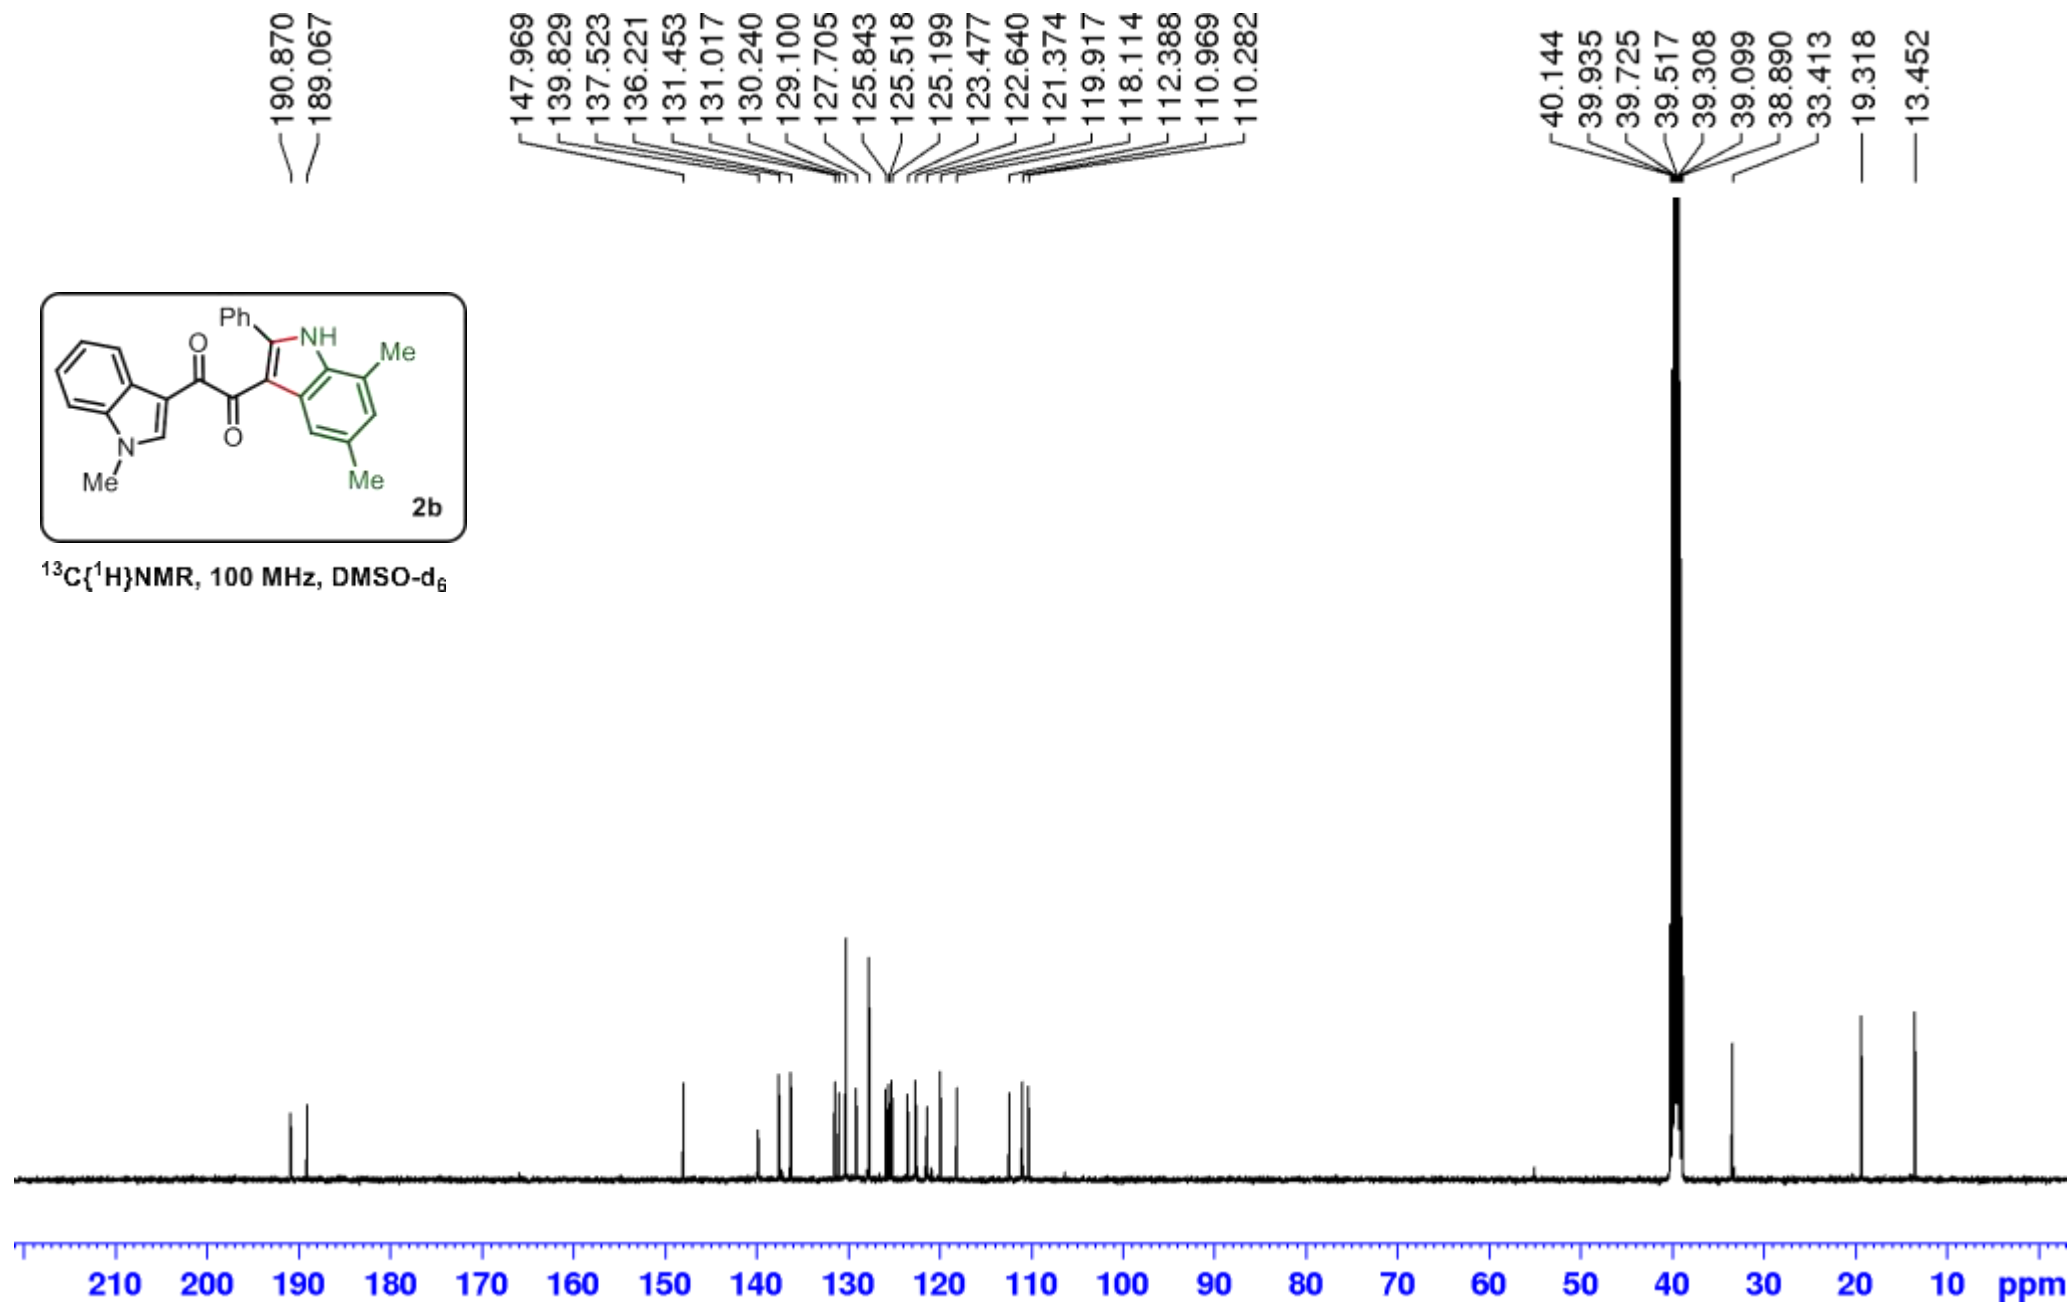

# Elemental Composition Report

## Single Mass Analysis

Tolerance = 100.0 PPM / DBE: min = -1.5, max = 50.0

Element prediction: Off

Number of isotope peaks used for i-FIT = 3

Monoisotopic Mass, Even Electron Ions

18 formula(e) evaluated with 1 results within limits (up to 3 closest results for each mass)

Elements Used:

C: 0-27 H: 0-100 N: 0-2 O: 0-2

NVD-43

240423\_03 6 (0.138)

QMI DIVISION, CSIR-IIIM JAMMU  
Xevo G2-XS QTOF YFC2015

24-Apr-2023  
12:14:11  
1: TOF MS ES+  
1.59e+007

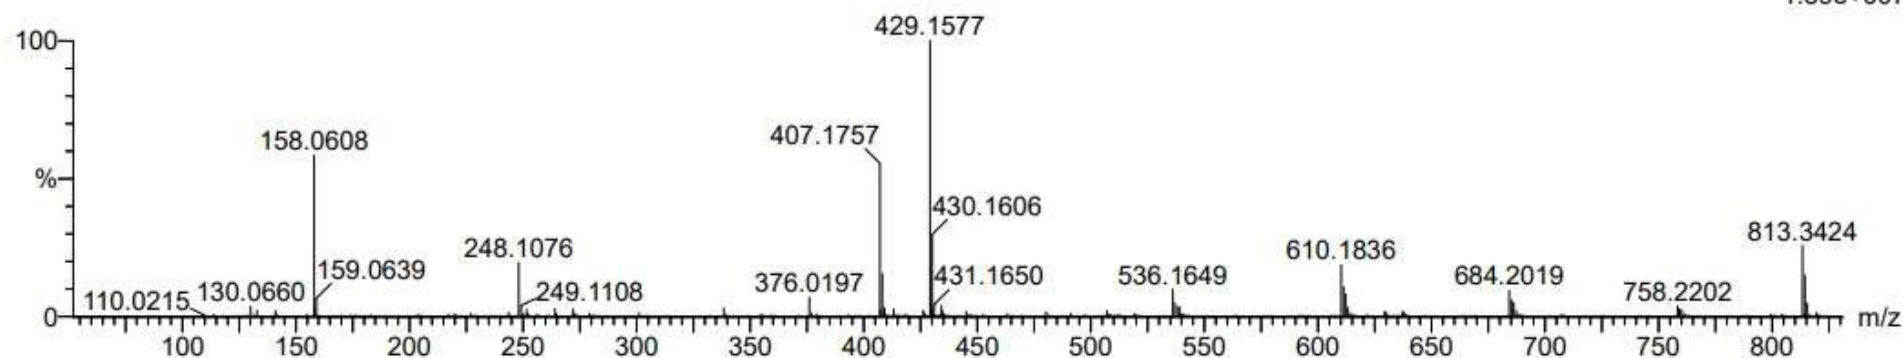

Minimum: -1.5  
Maximum: 2.0 100.0 50.0

| Mass     | Calc. Mass | mDa  | PPM  | DBE  | i-FIT  | Norm | Conf (%) | Formula       |
|----------|------------|------|------|------|--------|------|----------|---------------|
| 407.1757 | 407.1760   | -0.3 | -0.7 | 17.5 | 1016.5 | n/a  | n/a      | C27 H23 N2 O2 |

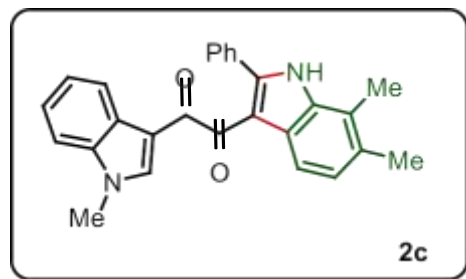

<sup>1</sup>HNMR, 400 MHz, DMSO-d<sub>6</sub>

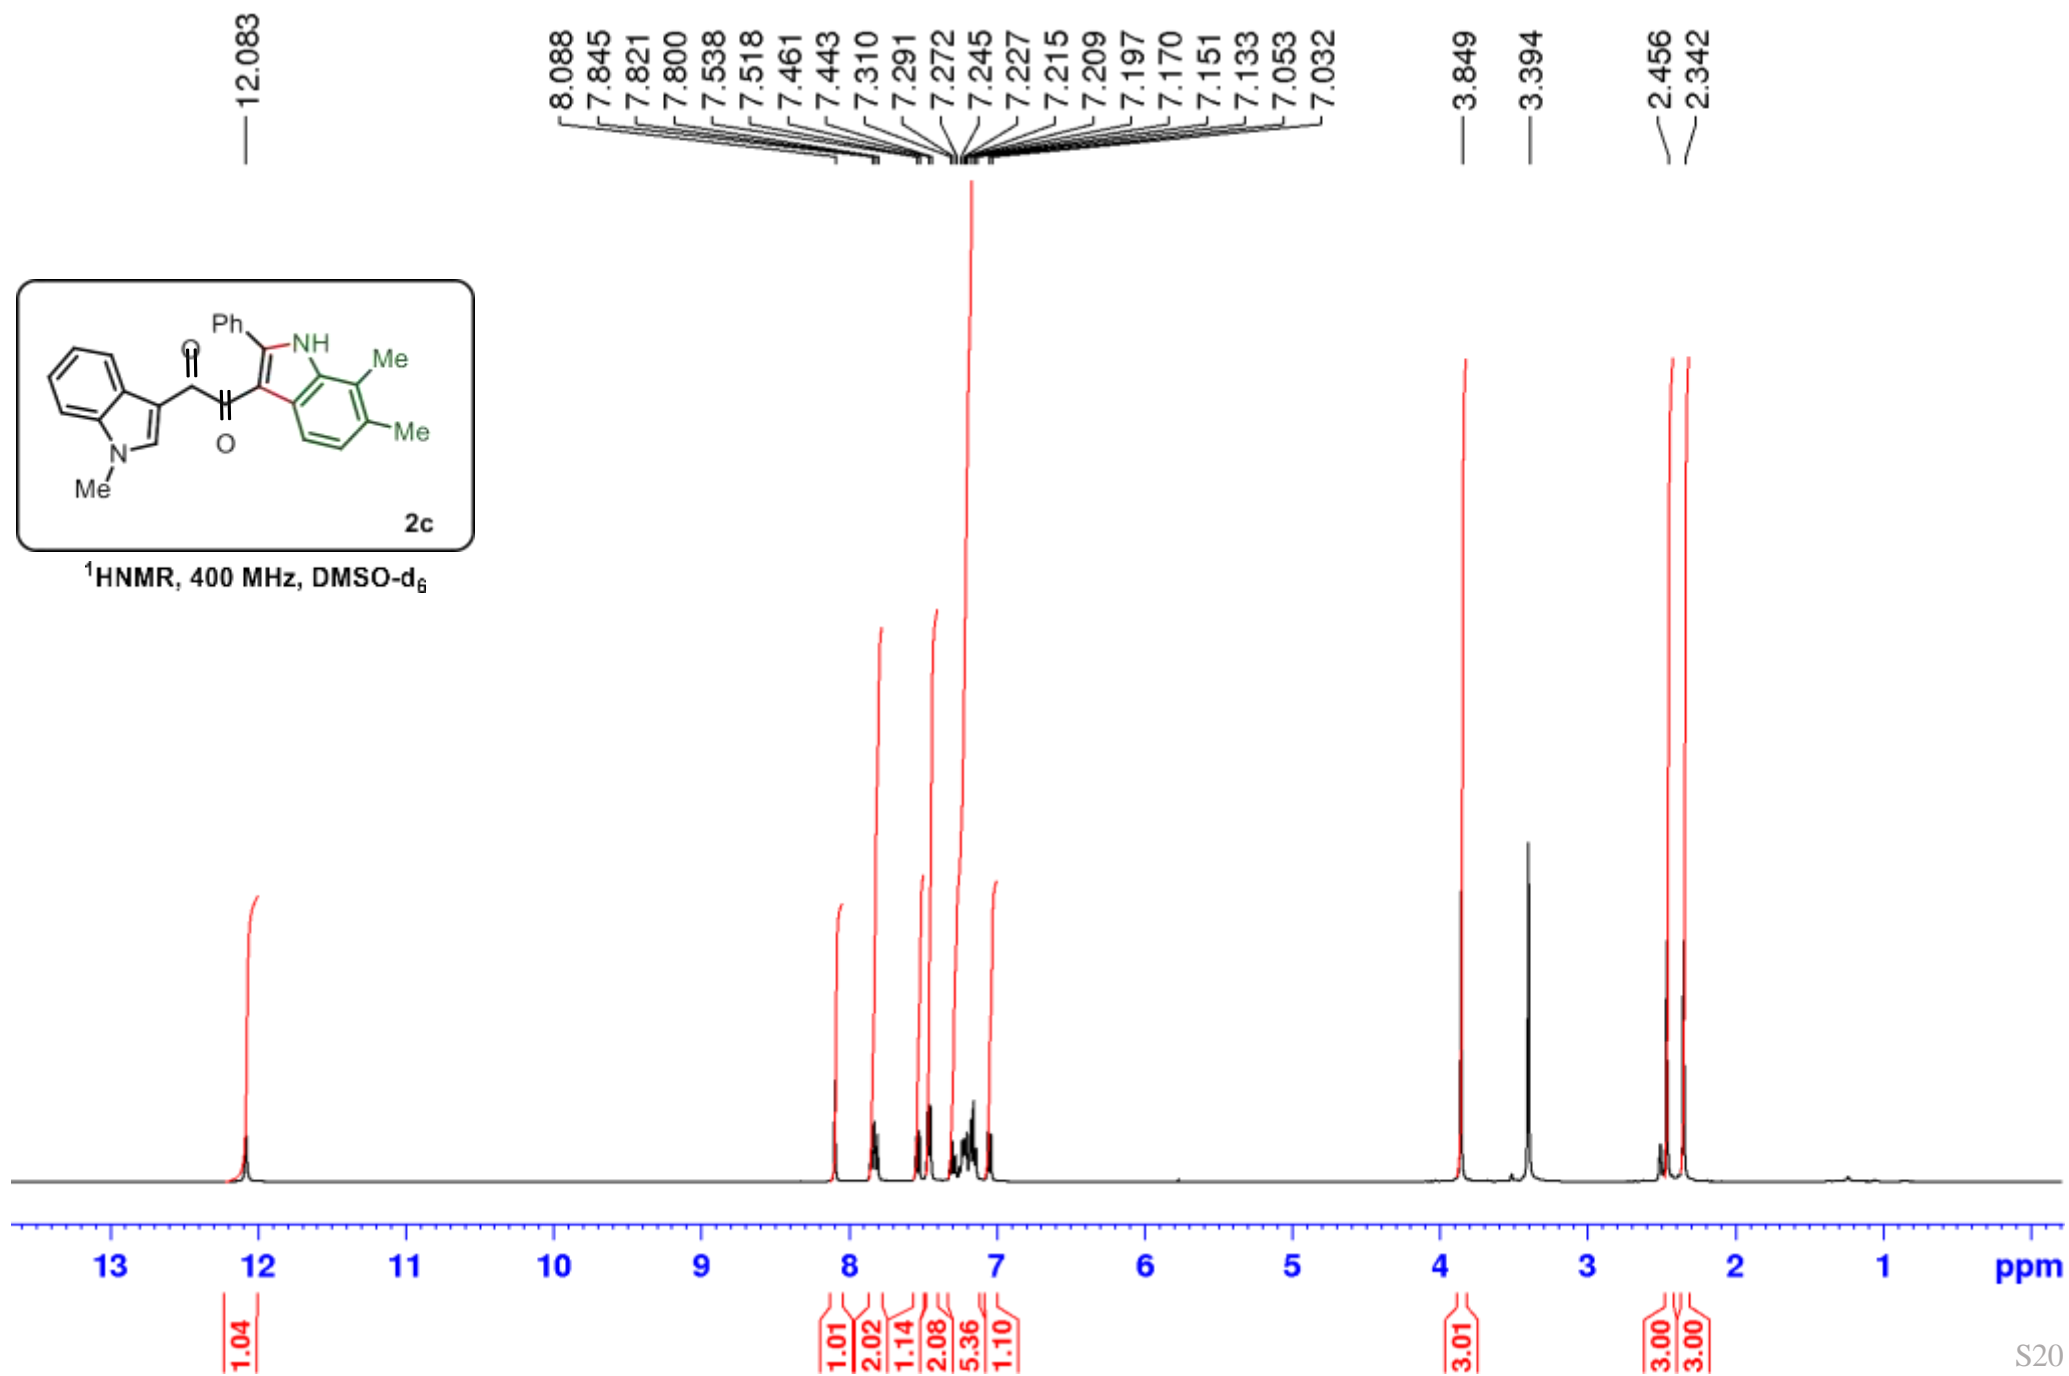

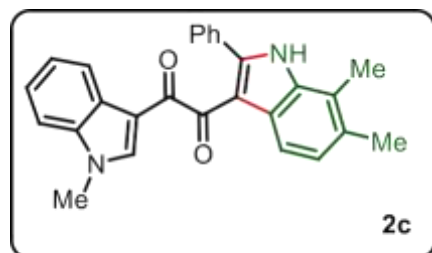

$^{13}\text{C}\{^1\text{H}\}$ NMR, 100 MHz, DMSO- $d_6$

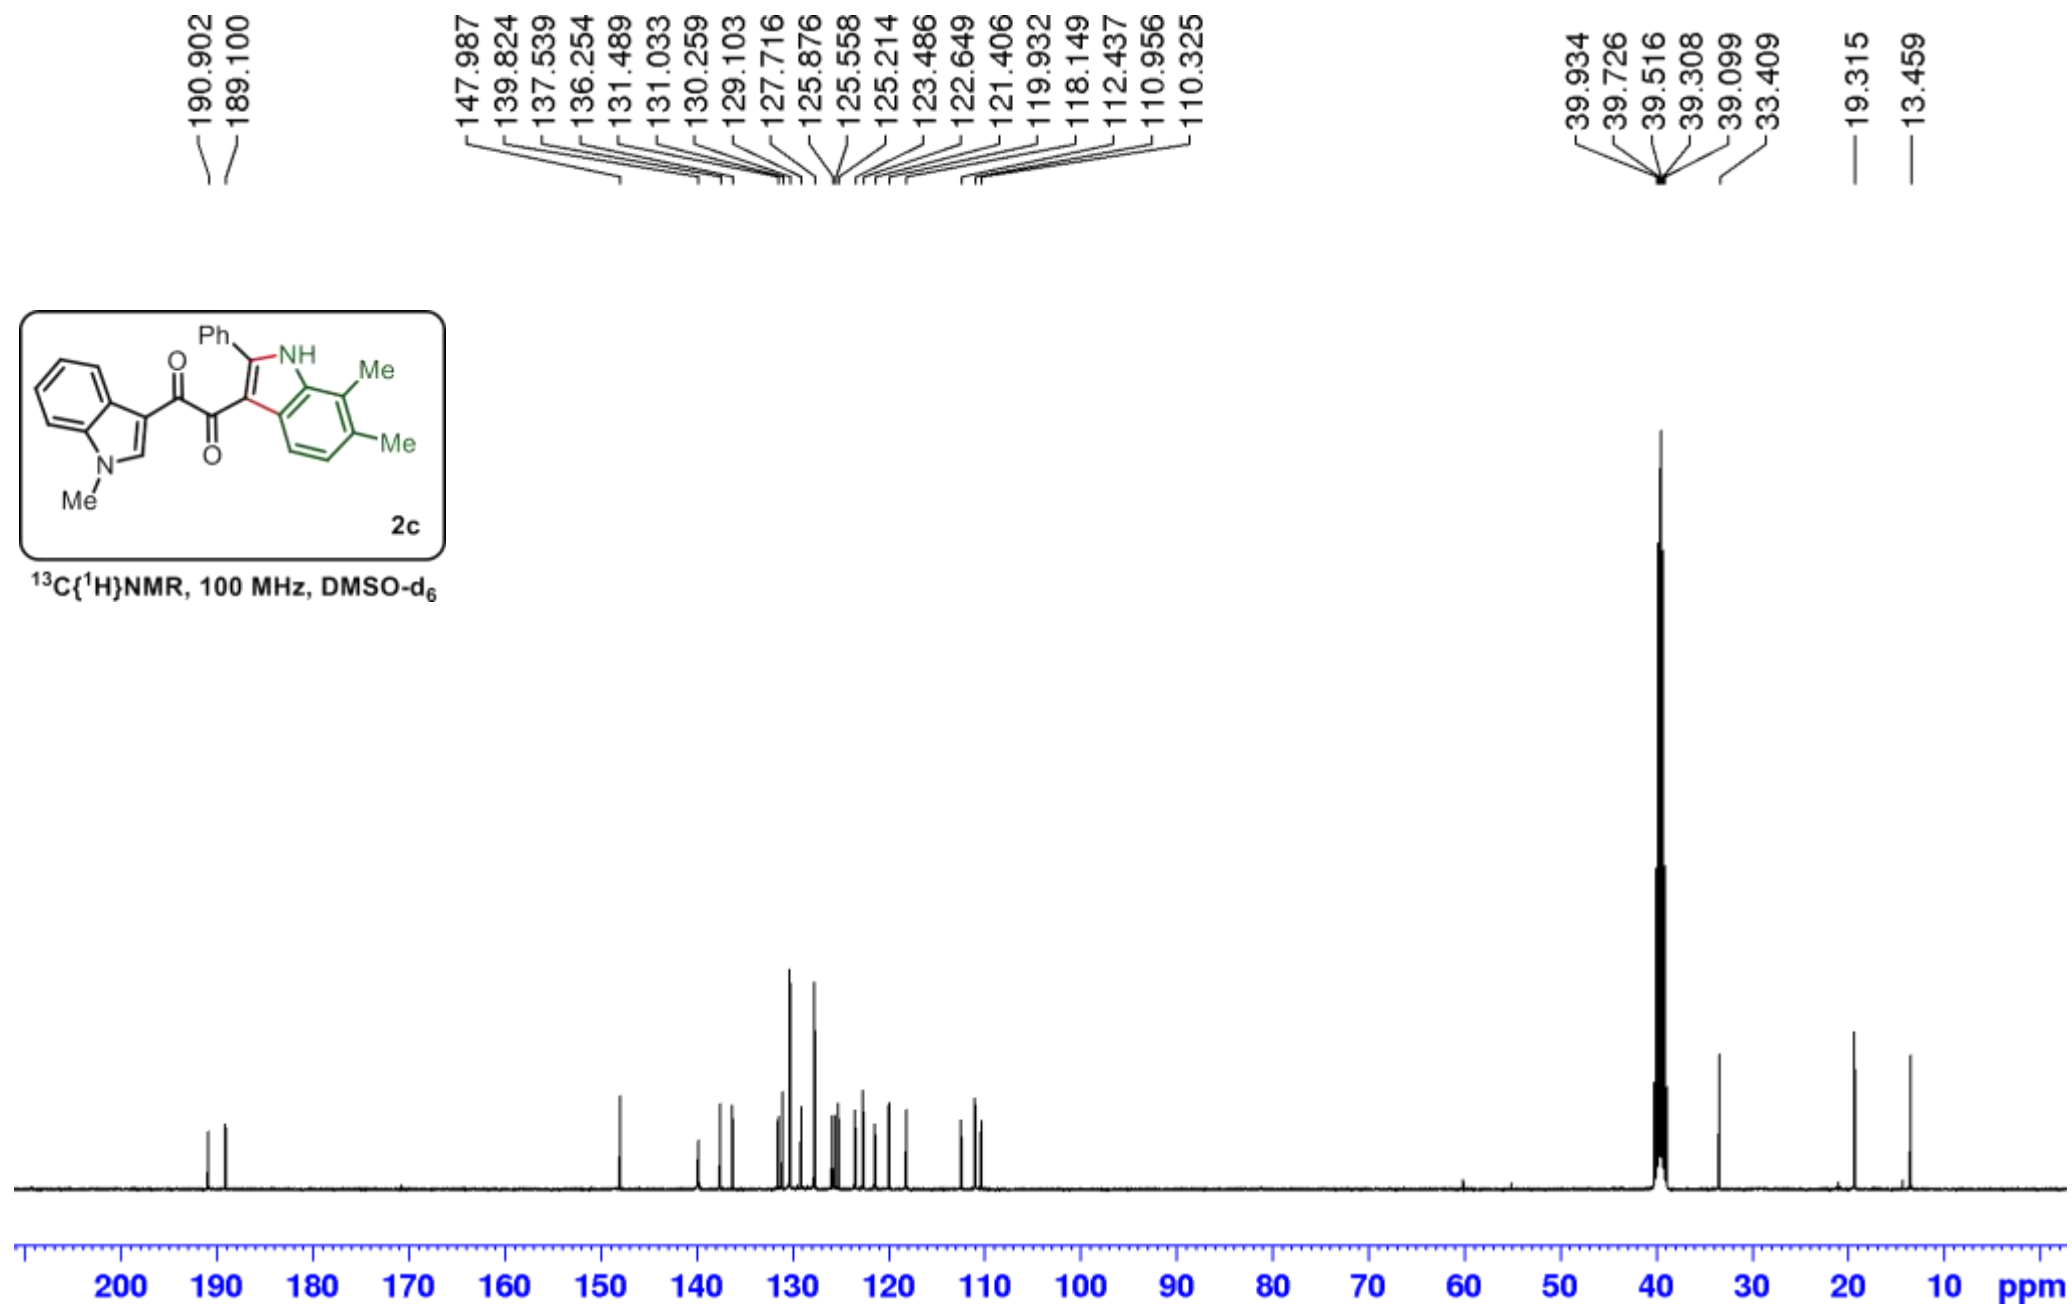

# Elemental Composition Report

## Single Mass Analysis

Tolerance = 100.0 PPM / DBE: min = -1.5, max = 50.0

Element prediction: Off

Number of isotope peaks used for i-FIT = 3

Monoisotopic Mass, Even Electron Ions

18 formula(e) evaluated with 1 results within limits (up to 3 closest results for each mass)

Elements Used:

C: 0-27 H: 0-100 N: 0-2 O: 0-2

NVD 52

QMI DIVISION, CSIR-IIIM JAMMU  
Xevo G2-XS QTOF YFC2015

17-May-2023  
11:52:01  
1: TOF MS ES+  
1.63e+007

170523\_06 6 (0.138)

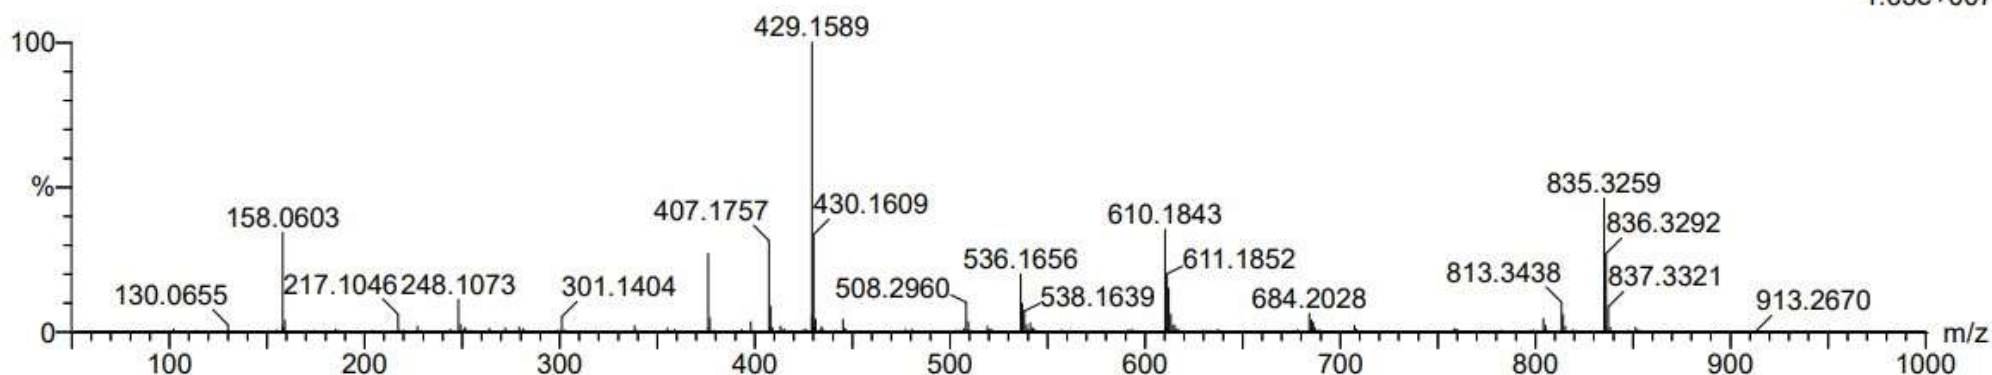

Minimum: -1.5  
Maximum: 2.0 100.0 50.0

| Mass     | Calc. Mass | mDa  | PPM  | DBE  | i-FIT | Norm | Conf (%) | Formula       |
|----------|------------|------|------|------|-------|------|----------|---------------|
| 407.1757 | 407.1760   | -0.3 | -0.7 | 17.5 | 982.5 | n/a  | n/a      | C27 H23 N2 O2 |

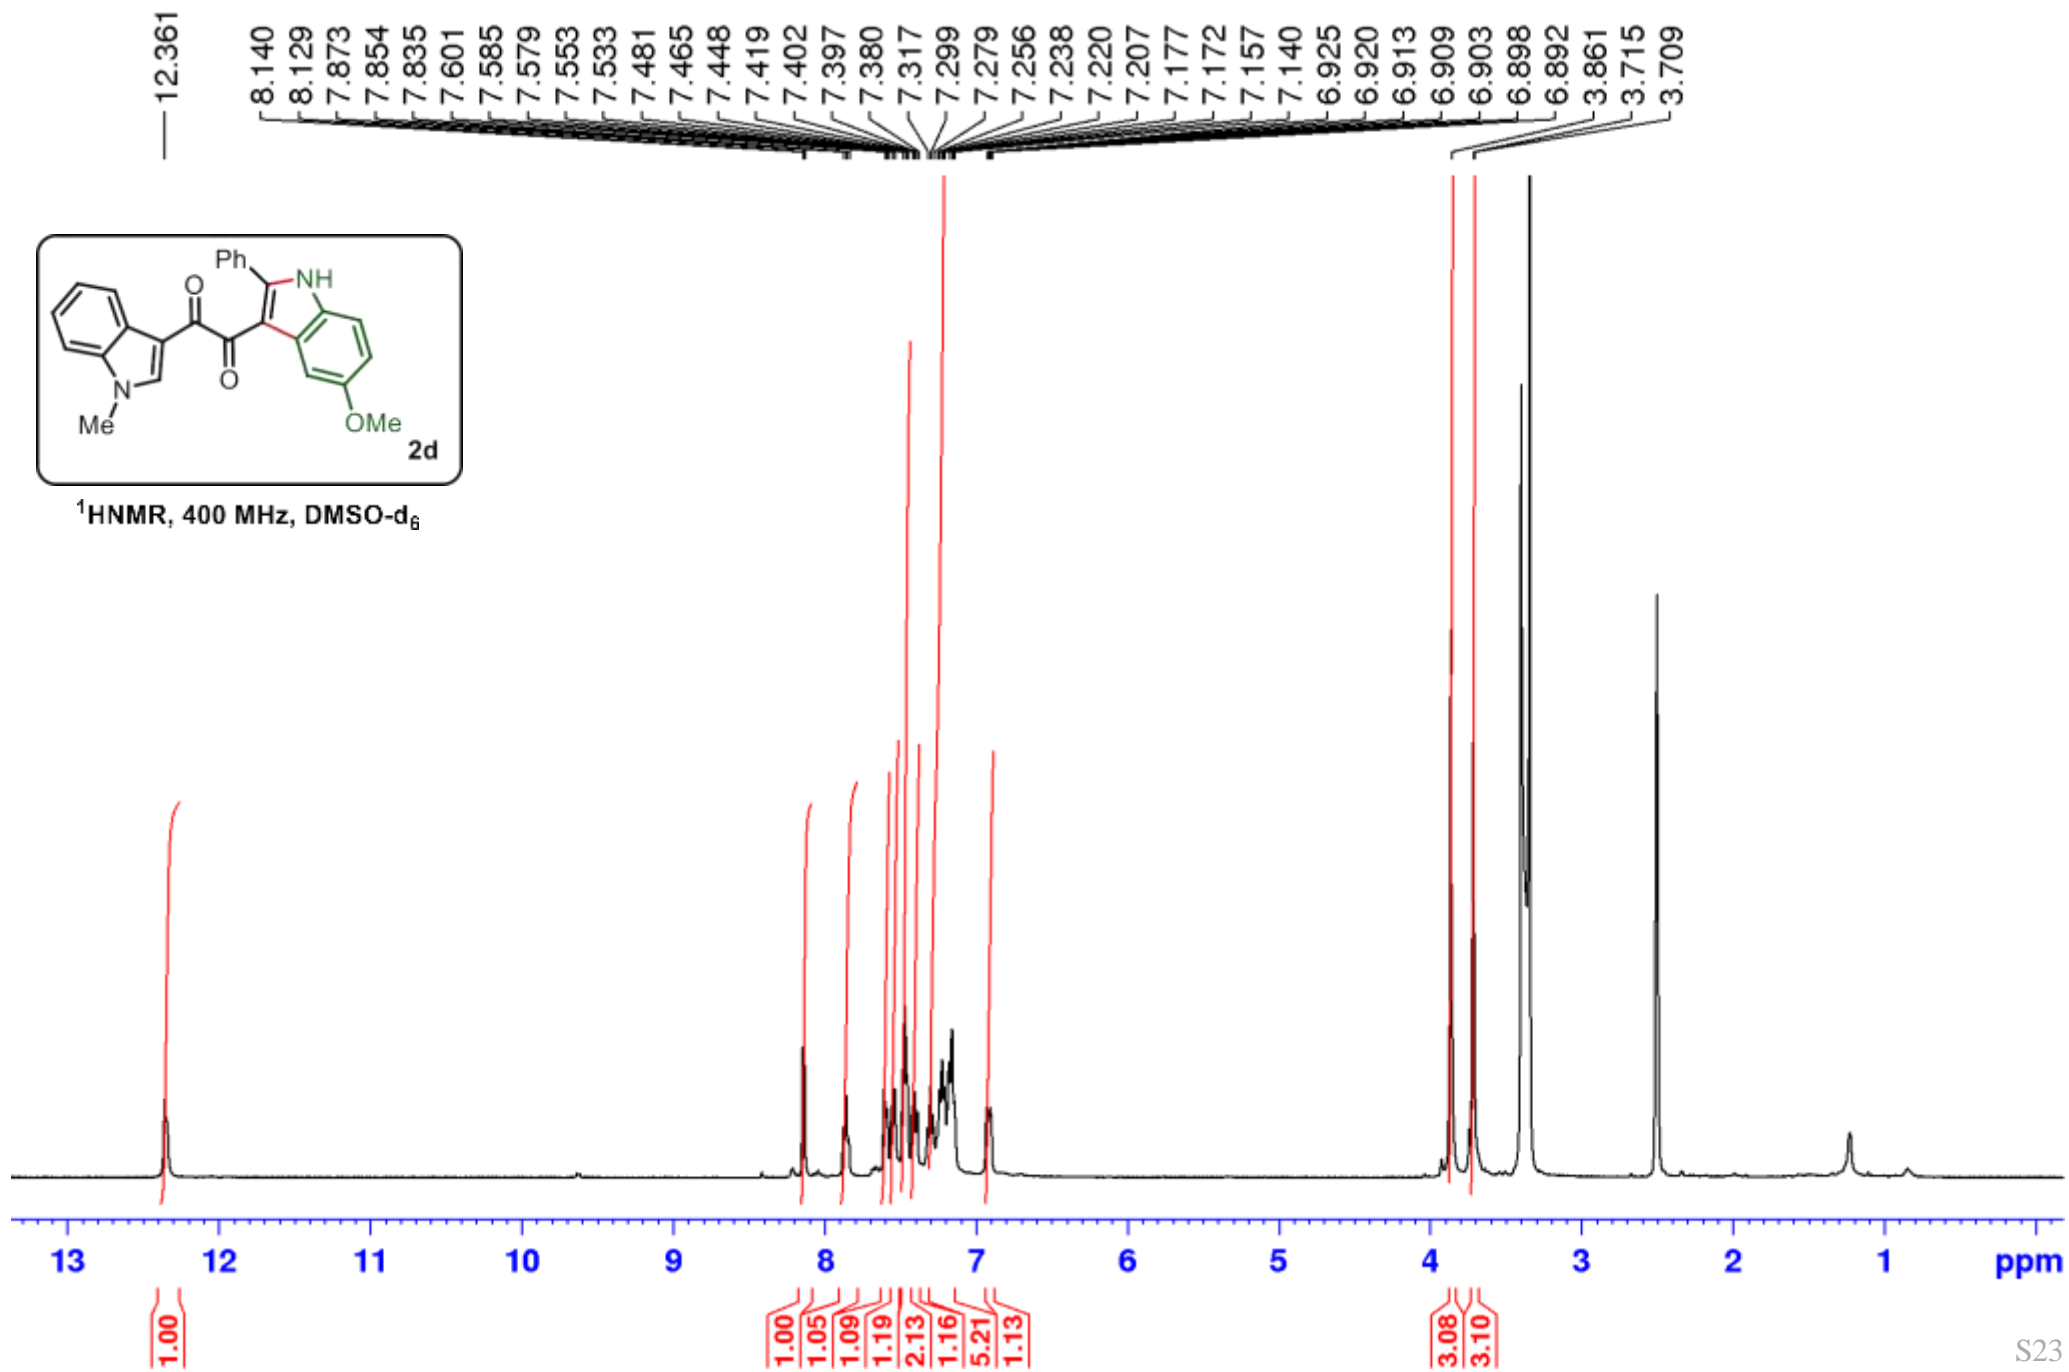

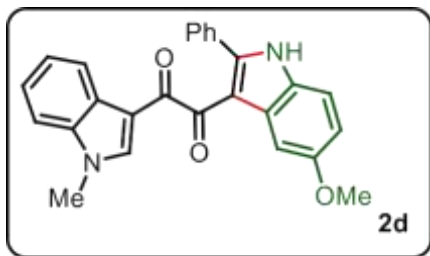

$^{13}\text{C}\{^1\text{H}\}$ NMR, 100 MHz,  $\text{CDCl}_3$

190.975  
188.934

156.621  
148.337  
139.261  
137.575  
131.265  
130.927  
129.232  
129.089  
128.958  
128.217  
126.500  
123.798  
122.988  
122.546  
113.997  
113.549  
113.138  
110.494  
109.792  
103.366

55.821

33.788

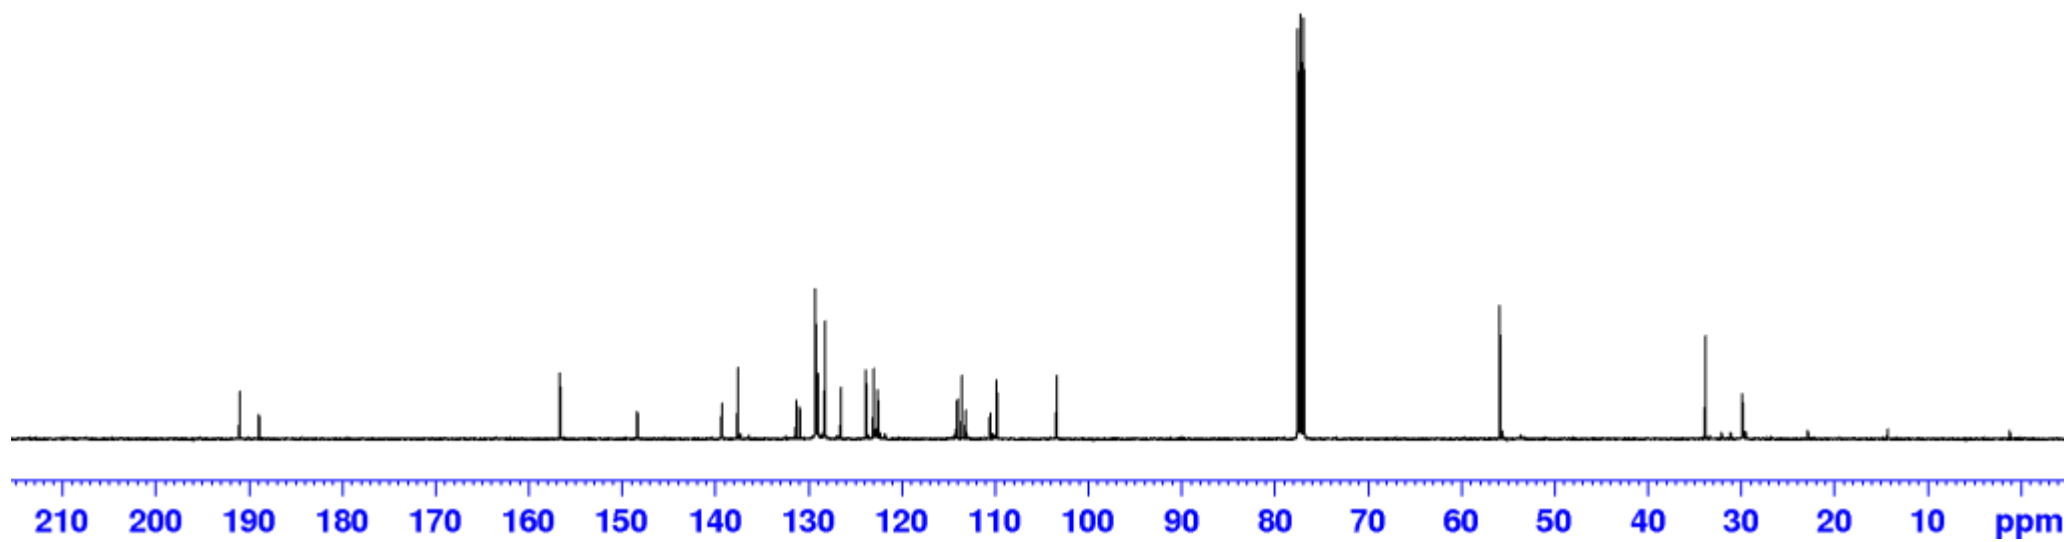



# Elemental Composition Report

## Single Mass Analysis

Tolerance = 100.0 PPM / DBE: min = -1.5, max = 50.0

Element prediction: Off

Number of isotope peaks used for i-FIT = 3

Monoisotopic Mass, Even Electron Ions

21 formula(e) evaluated with 1 results within limits (up to 3 closest results for each mass)

Elements Used:

C: 0-26 H: 0-100 N: 0-2 O: 0-3

NVD 51

QMI DIVISION, CSIR-IIIM JAMMU  
Xevo G2-XS QTOF YFC2015

17-May-2023  
11:41:45  
1: TOF MS ES+  
1.43e+007

170523\_02 5 (0.121)

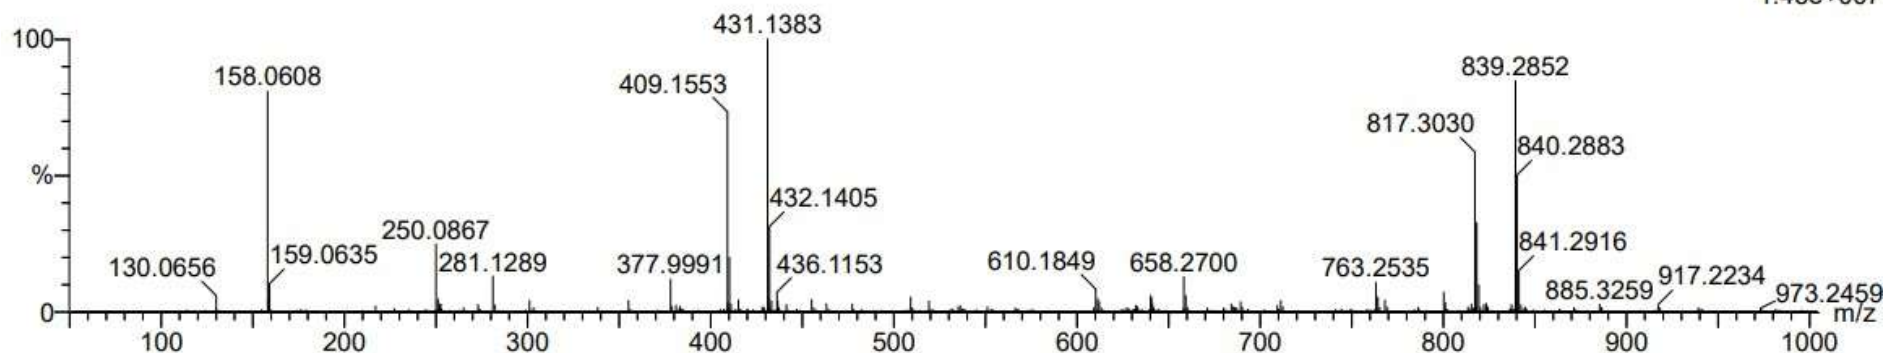

Minimum: -1.5  
Maximum: 2.0 100.0 50.0

| Mass     | Calc. Mass | mDa | PPM | DBE  | i-FIT  | Norm | Conf (%) | Formula       |
|----------|------------|-----|-----|------|--------|------|----------|---------------|
| 409.1553 | 409.1552   | 0.1 | 0.2 | 17.5 | 1021.9 | n/a  | n/a      | C26 H21 N2 O3 |

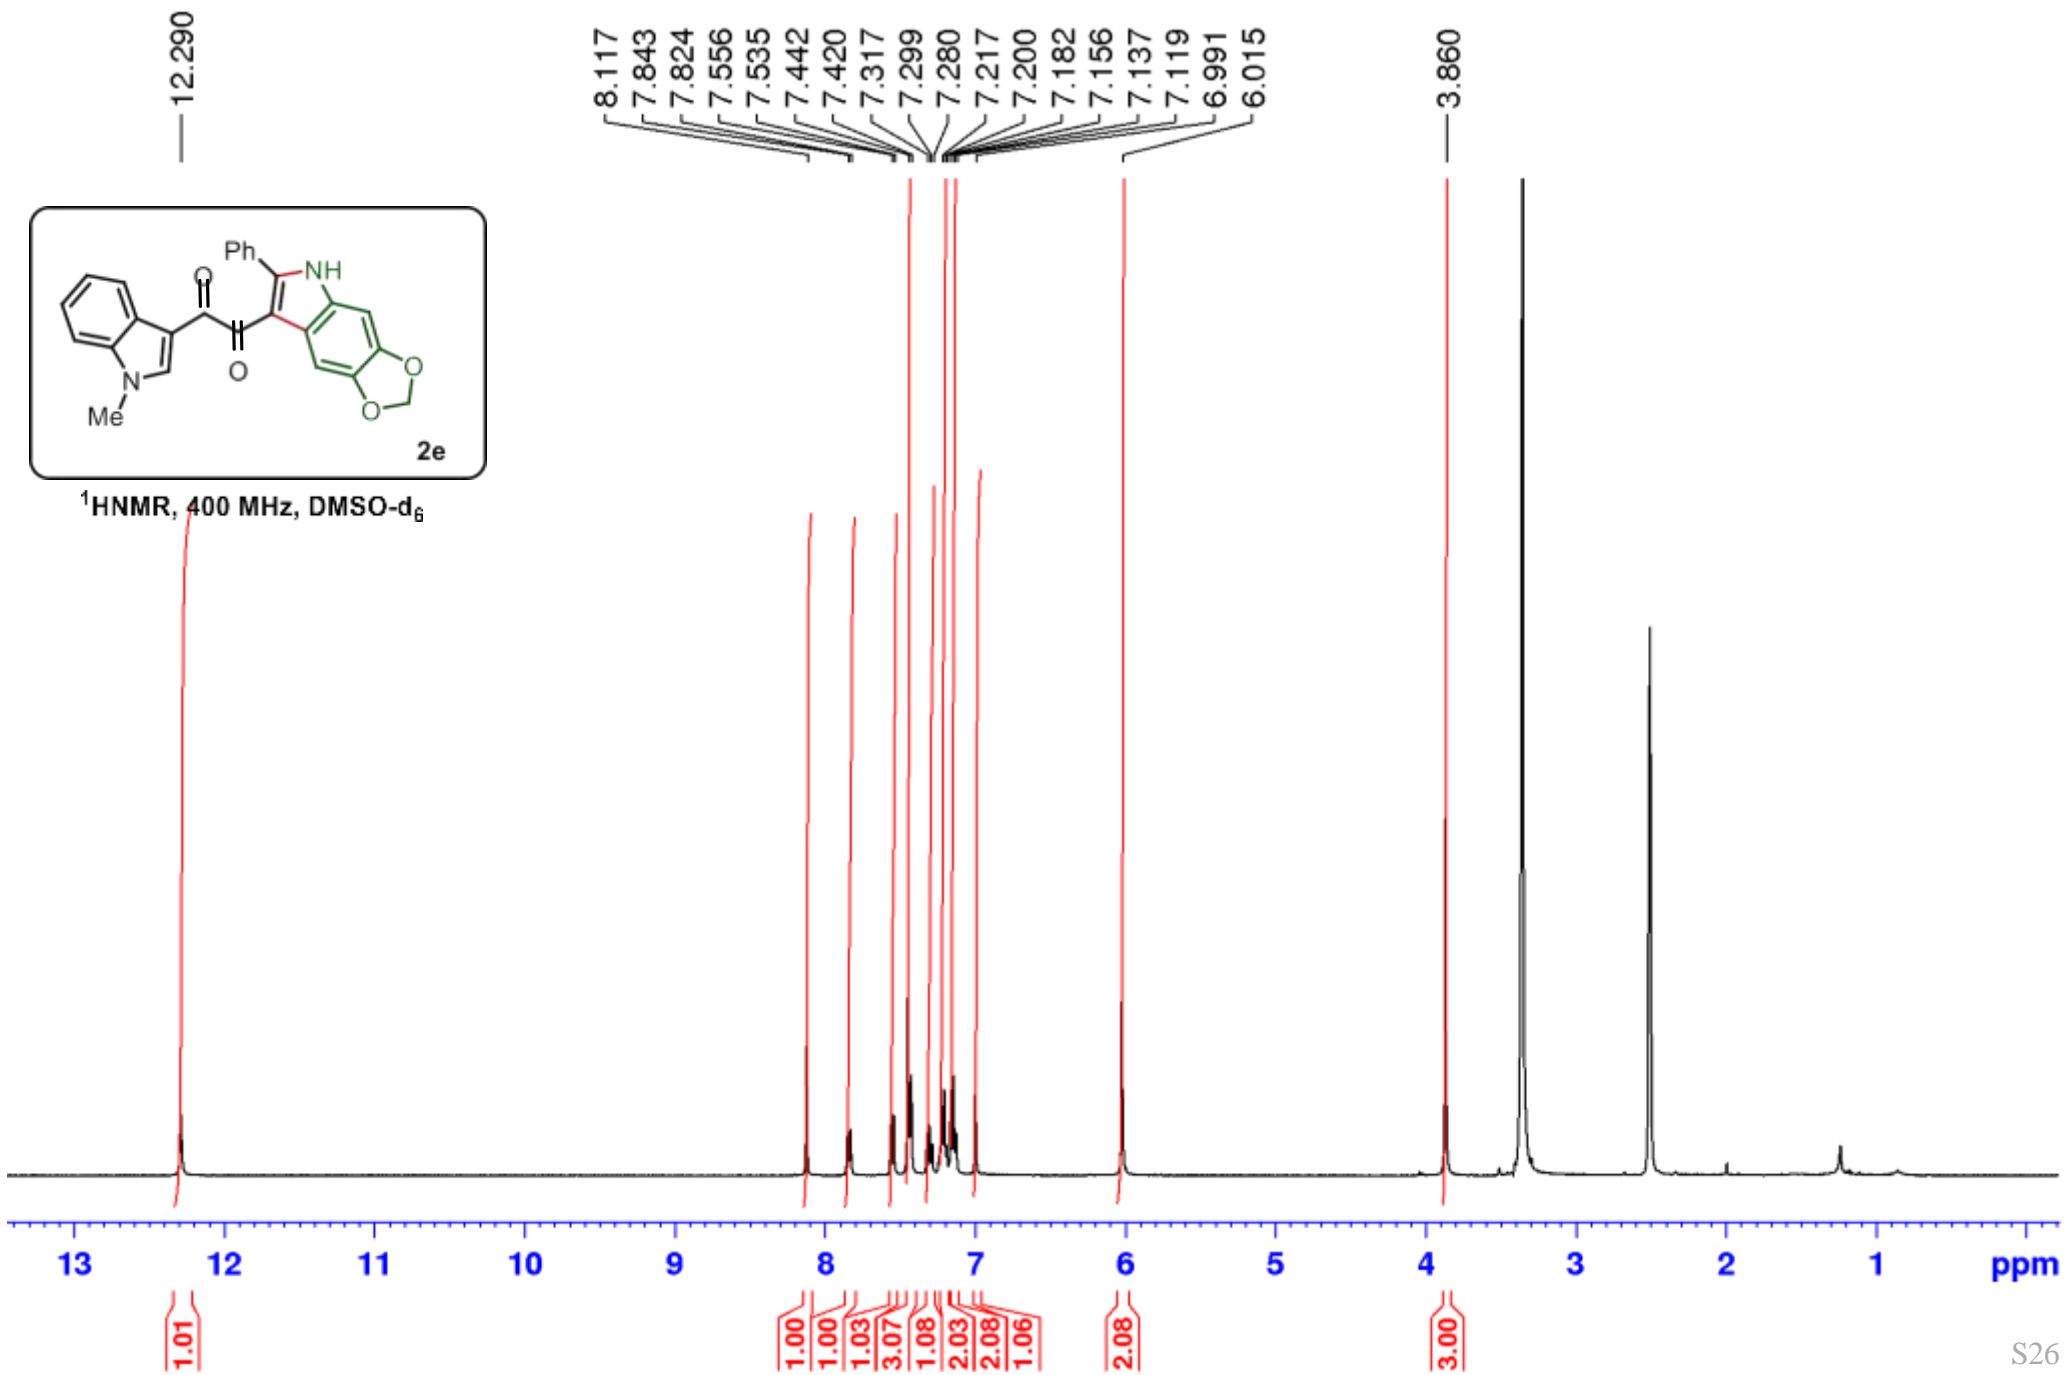

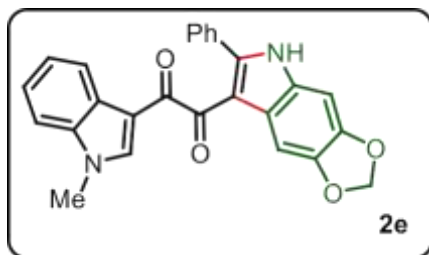

$^{13}\text{C}\{^1\text{H}\}$ NMR, 100 MHz, DMSO- $\text{d}_6$

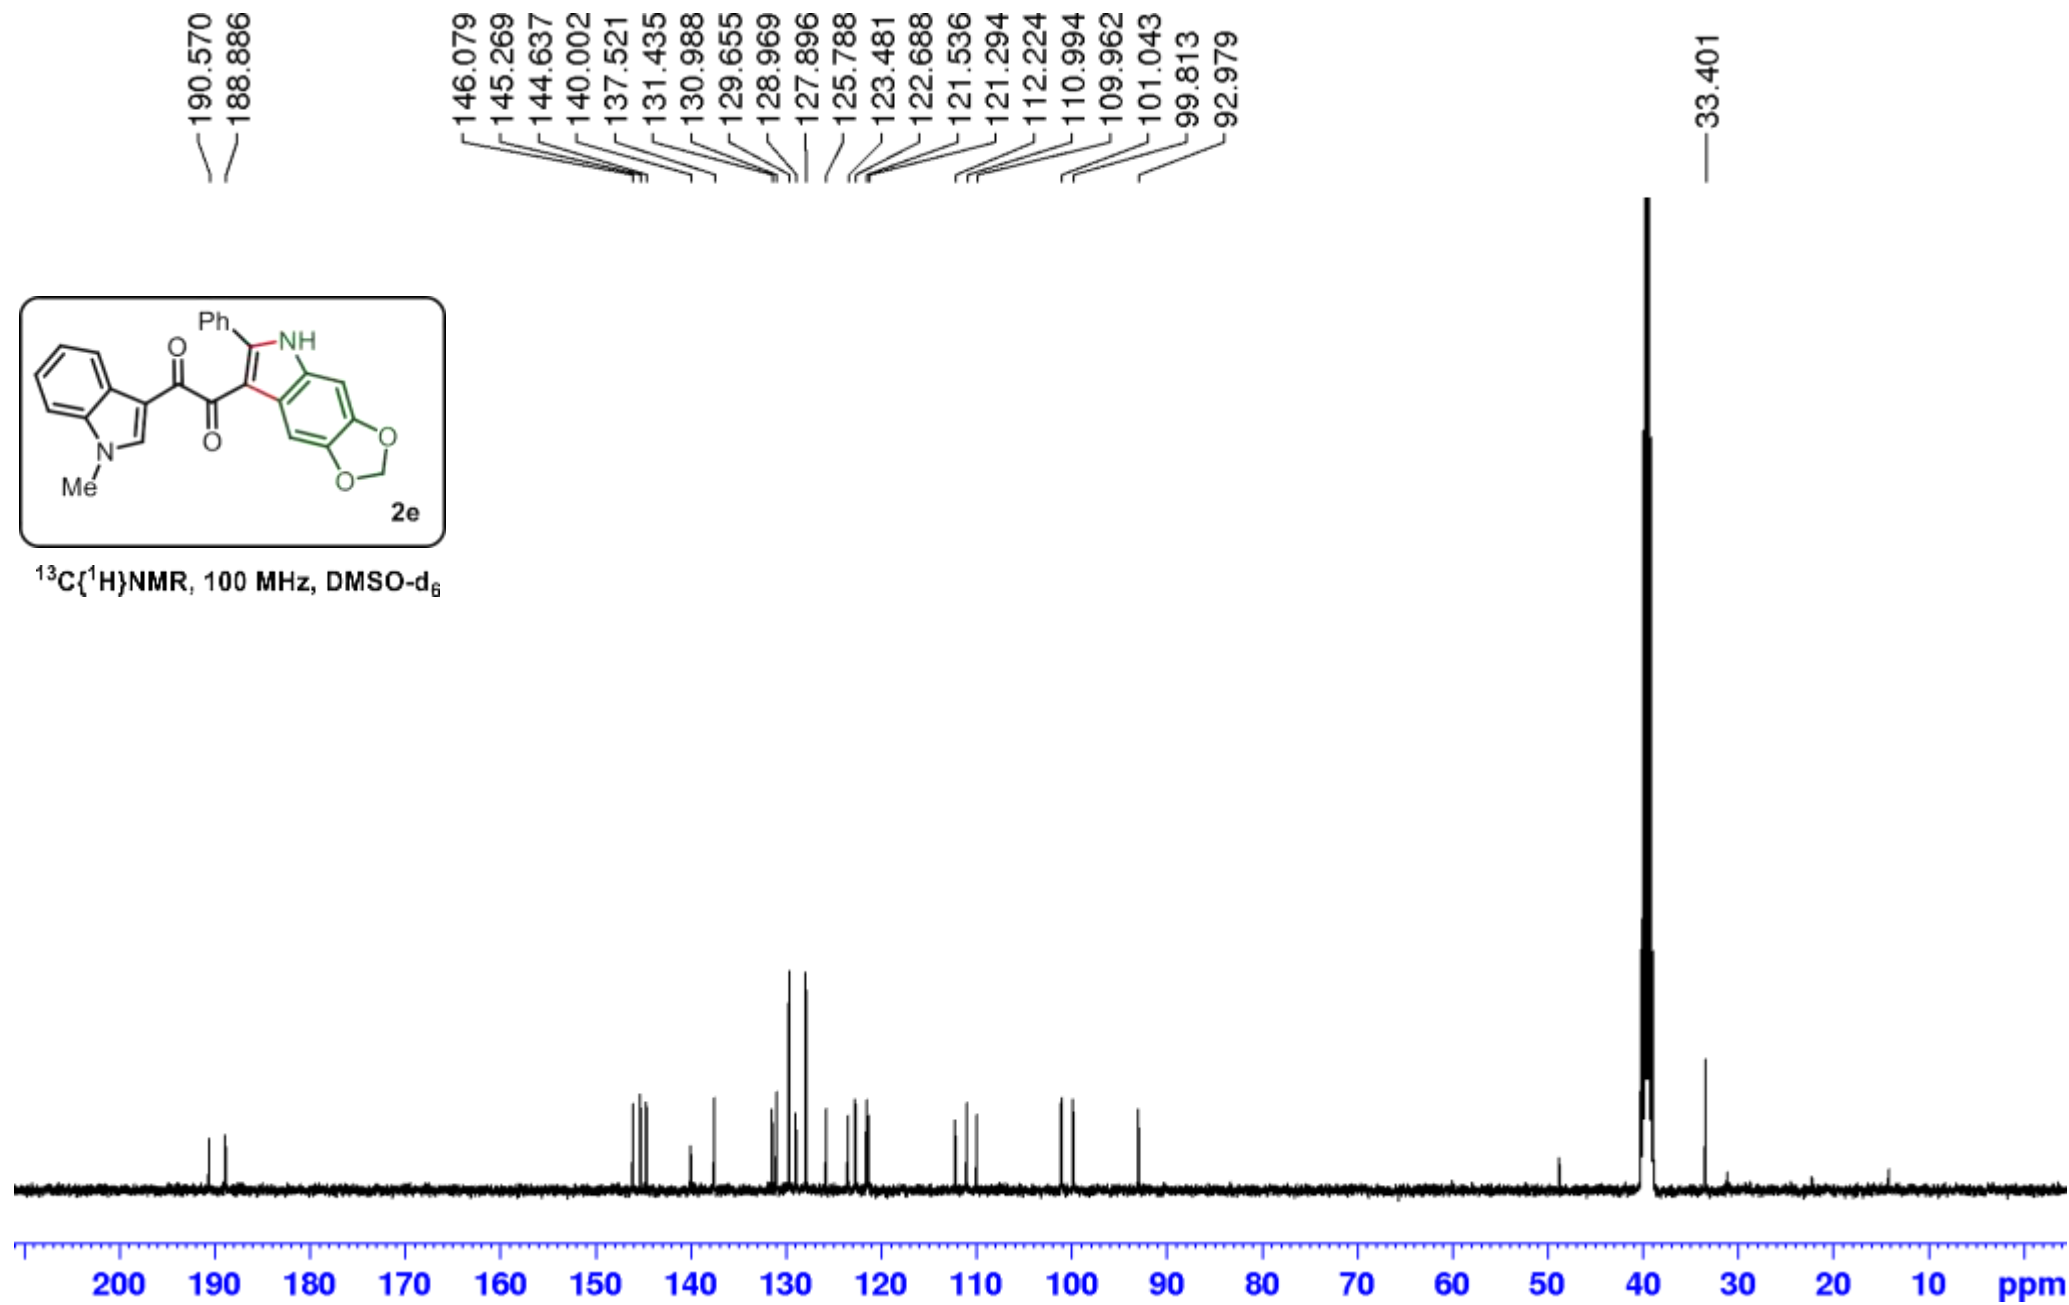

# Elemental Composition Report

## Single Mass Analysis

Tolerance = 100.0 PPM / DBE: min = -1.5, max = 50.0

Element prediction: Off

Number of isotope peaks used for i-FIT = 3

Monoisotopic Mass, Even Electron Ions

25 formula(e) evaluated with 1 results within limits (up to 3 closest results for each mass)

Elements Used:

C: 0-26 H: 0-100 N: 0-2 O: 0-4

NVD 46

QMI DIVISION, CSIR-IIIM JAMMU  
Xevo G2-XS QTOF YFC2015

17-May-2023

11:49:28

1: TOF MS ES+

1.09e+007

170523\_05 5 (0.121)

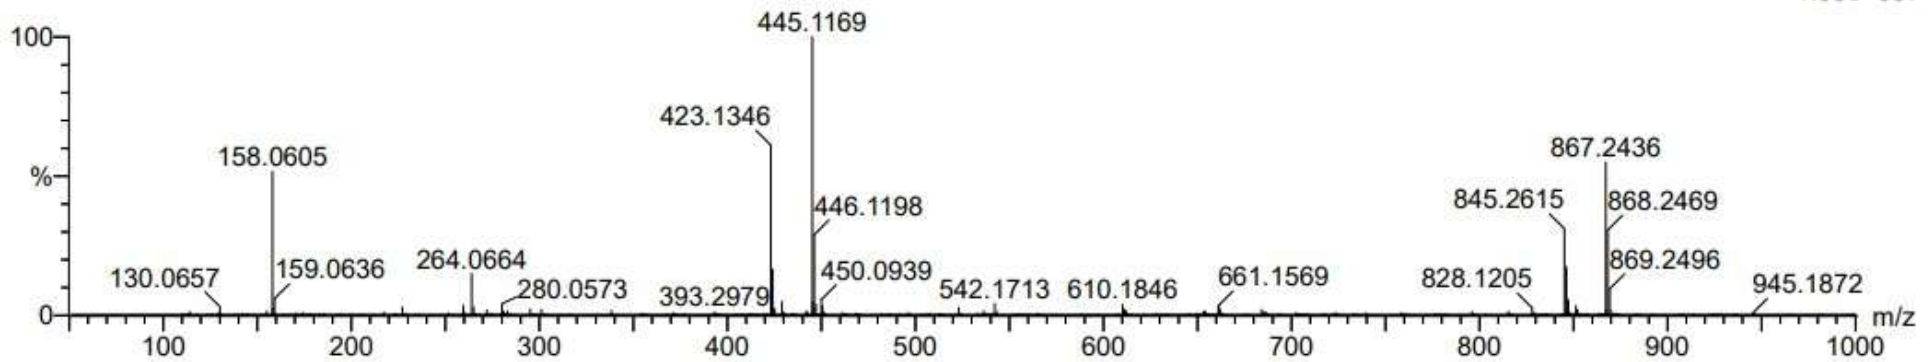

Minimum: -1.5  
Maximum: 2.0 100.0 50.0

| Mass     | Calc. Mass | mDa | PPM | DBE  | i-FIT | Norm | Conf (%) | Formula       |
|----------|------------|-----|-----|------|-------|------|----------|---------------|
| 423.1346 | 423.1345   | 0.1 | 0.2 | 18.5 | 933.2 | n/a  | n/a      | C26 H19 N2 O4 |

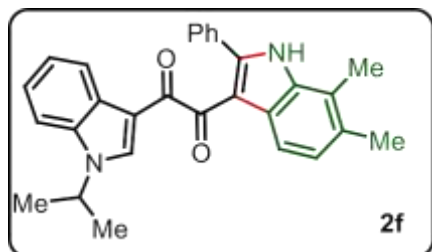

<sup>1</sup>HNMR, 400 MHz, DMSO-d<sub>6</sub>

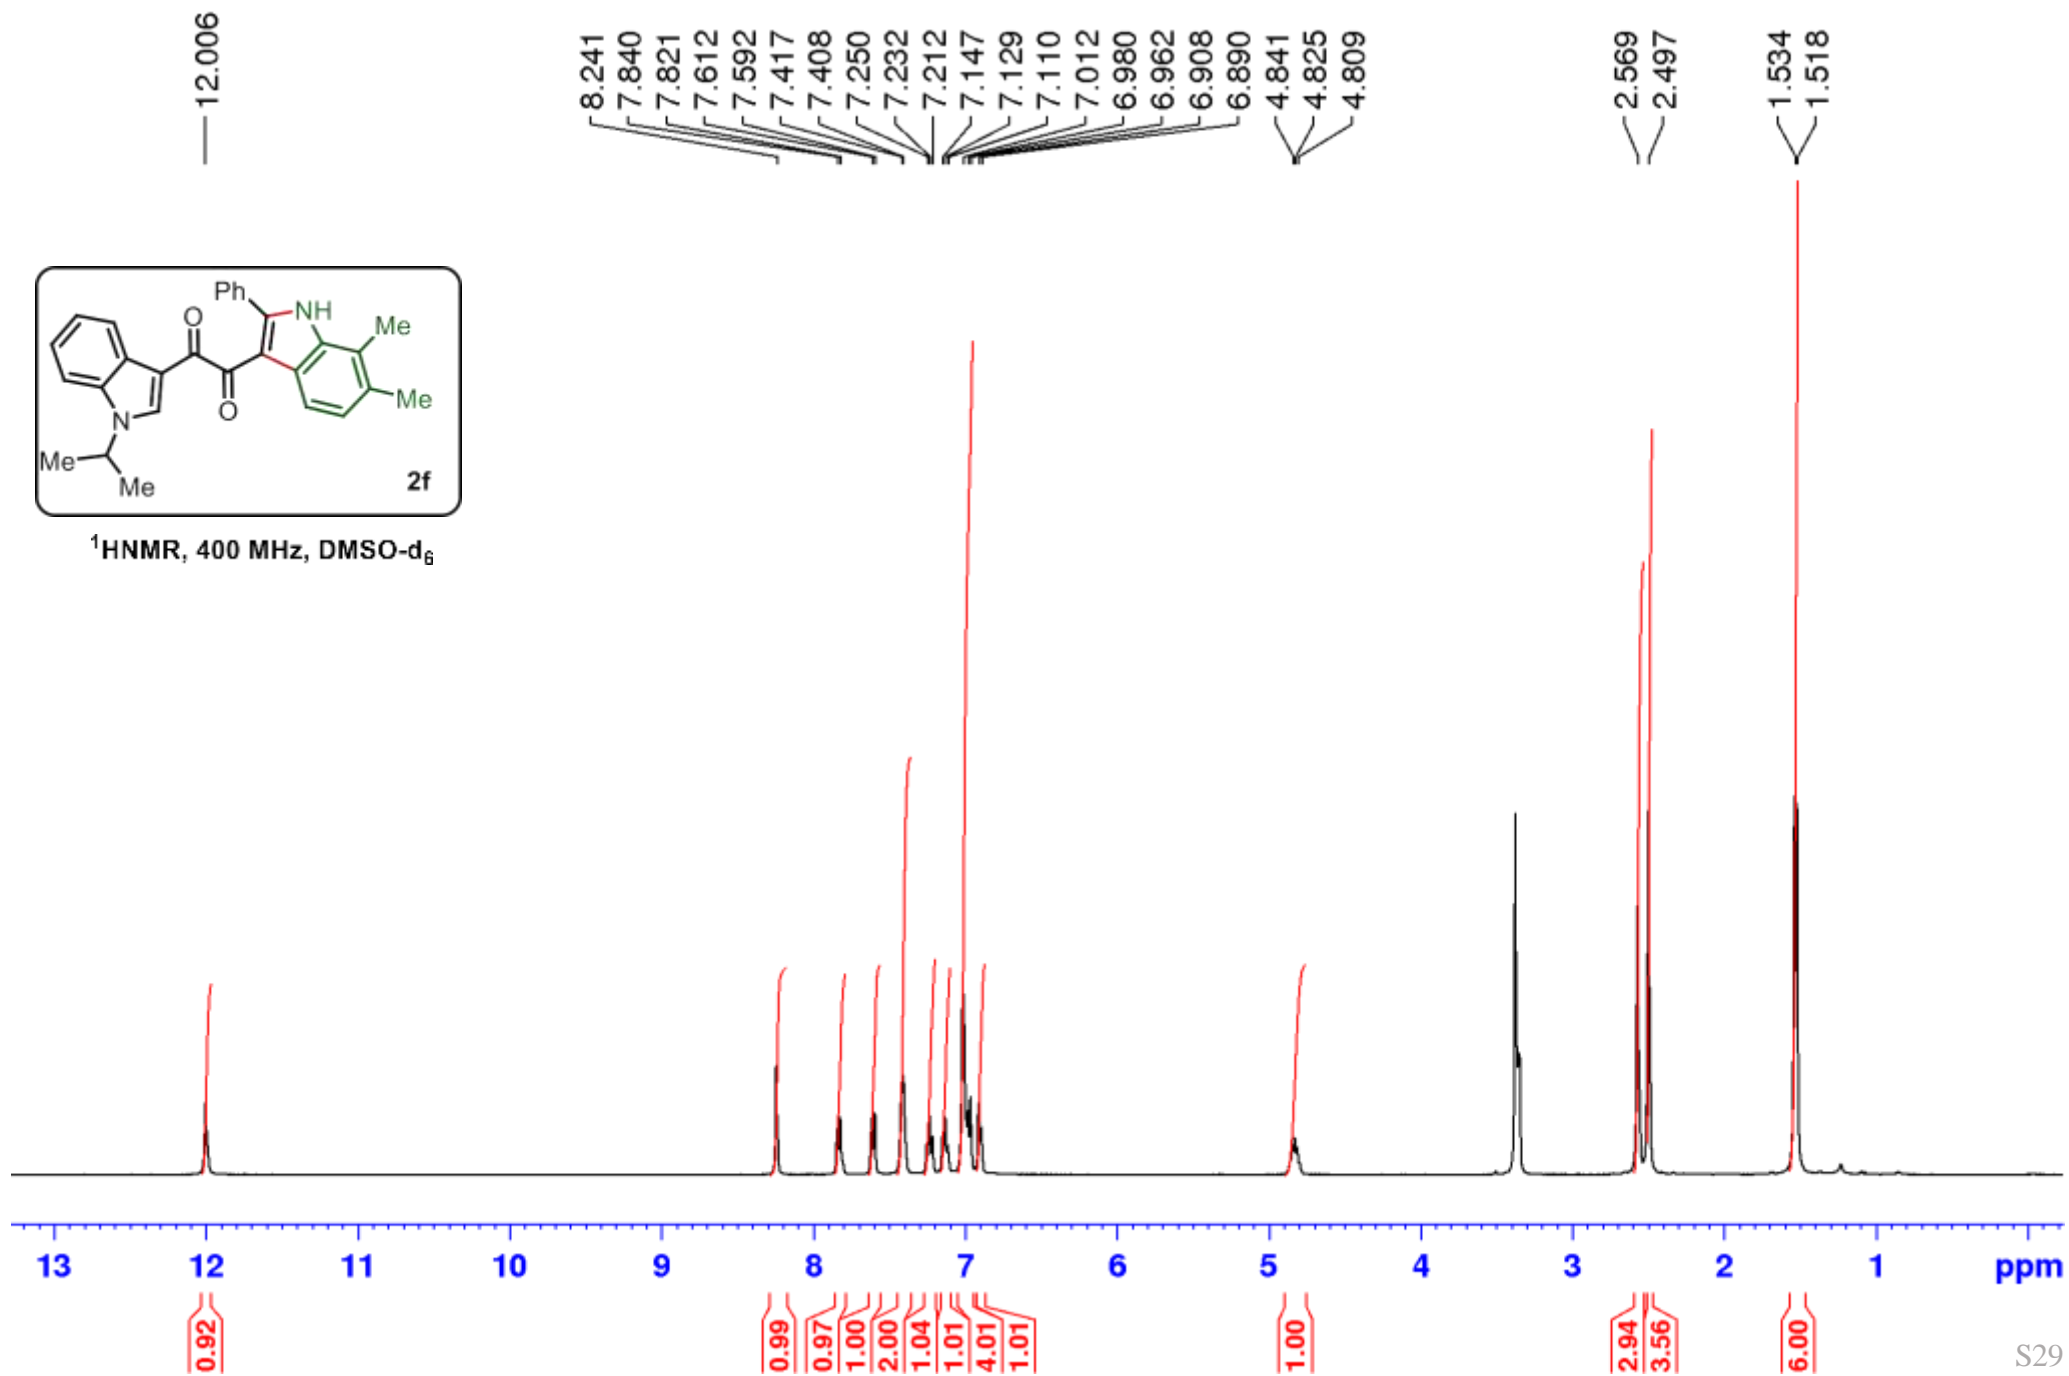

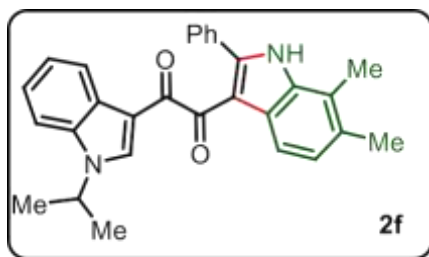

$^{13}\text{C}\{^1\text{H}\}$ NMR, 100 MHz,  $\text{CDCl}_3$

191.355  
188.600

146.878  
136.558  
135.645  
134.013  
131.835  
131.689  
129.533  
129.364  
128.240  
126.817  
125.868  
125.664  
123.420  
122.933  
122.805  
119.374  
118.335  
113.802  
111.841  
109.949

48.247

22.679  
19.470  
13.281

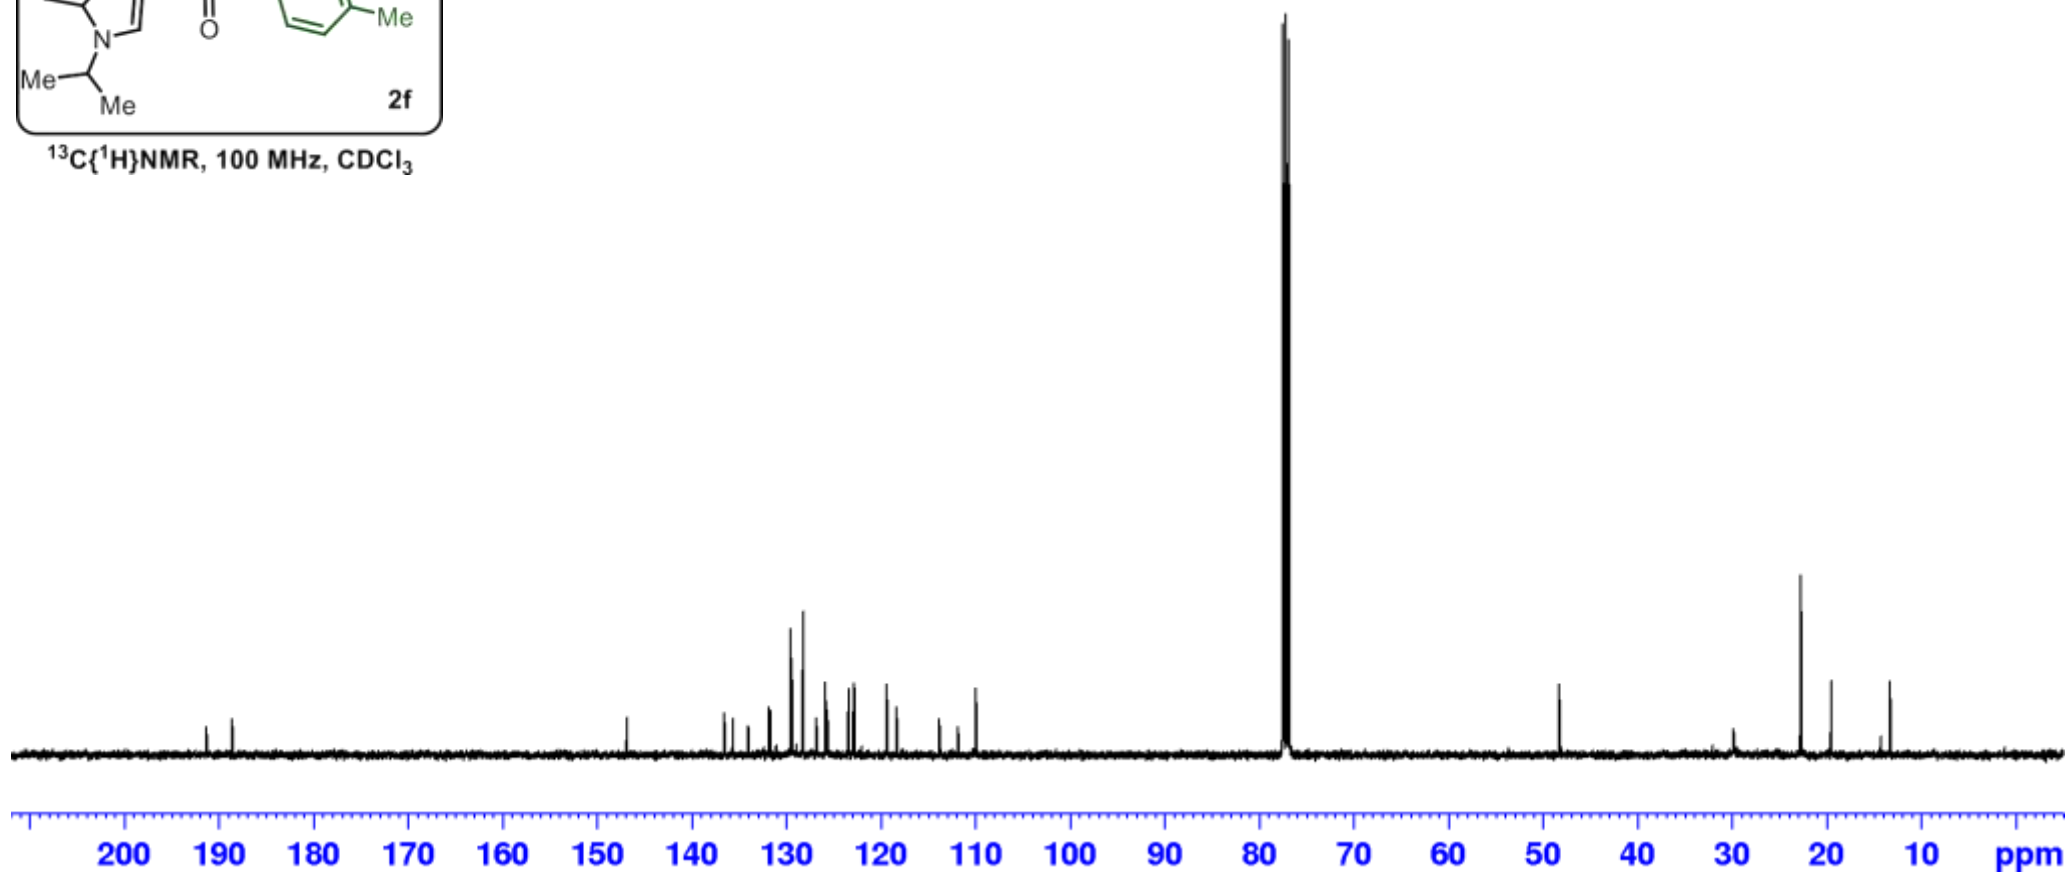

# Elemental Composition Report

## Single Mass Analysis

Tolerance = 50.0 PPM / DBE: min = -1.5, max = 50.0

Element prediction: Off

Number of isotope peaks used for i-FIT = 3

Monoisotopic Mass, Even Electron Ions

18 formula(e) evaluated with 1 results within limits (up to 3 closest results for each mass)

Elements Used:

C: 0-29 H: 0-100 N: 0-2 O: 0-2

NVD-100

QMI DIVISION, CSIR-IIIM JAMMU  
Xevo G2-XS QTOF YFC2015

03-May-2024

14:04:06

1: TOF MS ES+

9.60e+006

030524\_12 5 (0.121)

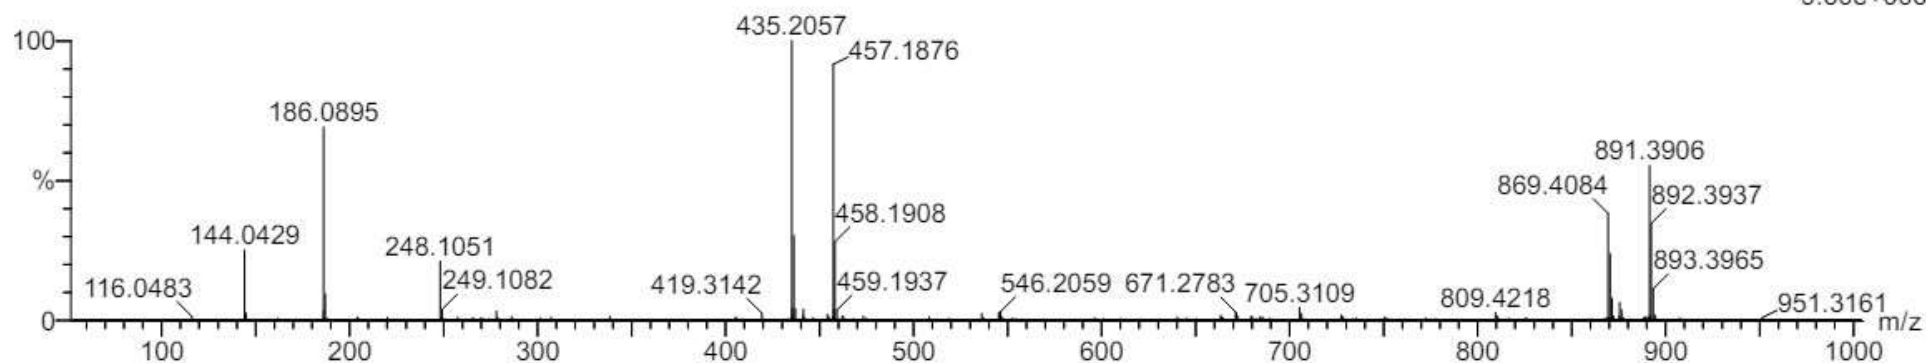

Minimum: -1.5  
Maximum: 2.0 50.0 50.0

| Mass     | Calc. Mass | mDa  | PPM  | DBE  | i-FIT  | Norm | Conf (%) | Formula       |
|----------|------------|------|------|------|--------|------|----------|---------------|
| 435.2057 | 435.2073   | -1.6 | -3.7 | 17.5 | 1029.8 | n/a  | n/a      | C29 H27 N2 O2 |

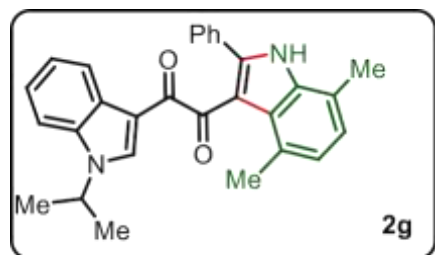

<sup>1</sup>H NMR, 400 MHz, DMSO-d<sub>6</sub>

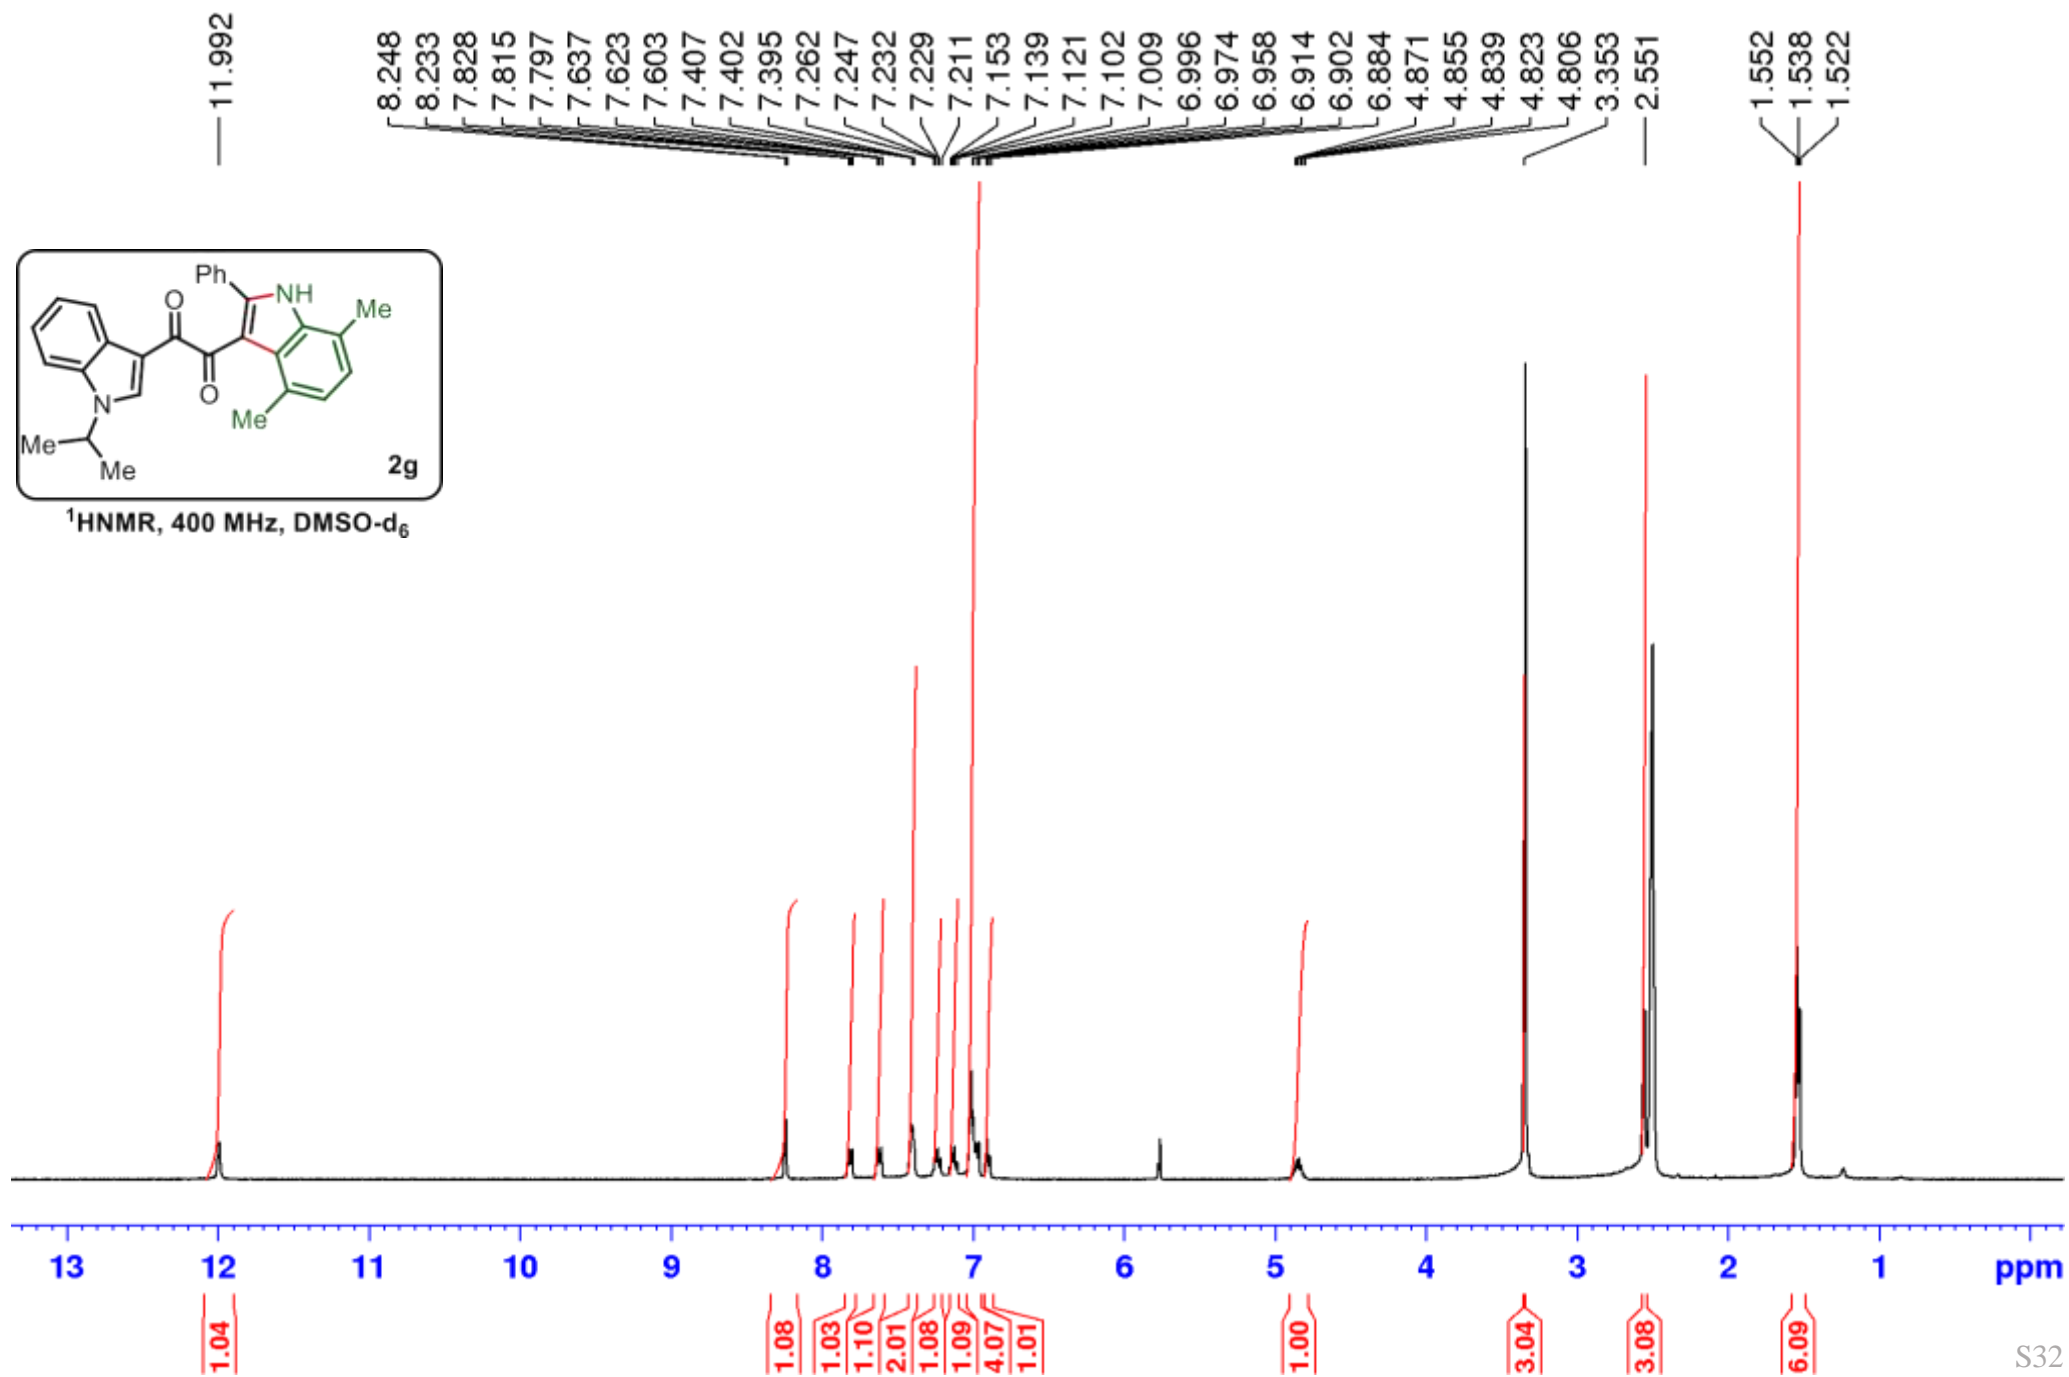



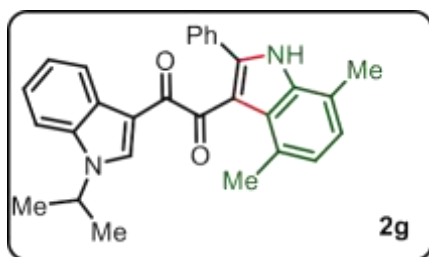

$^{13}\text{C}\{^1\text{H}\}$ NMR, 100 MHz,  $\text{CDCl}_3$

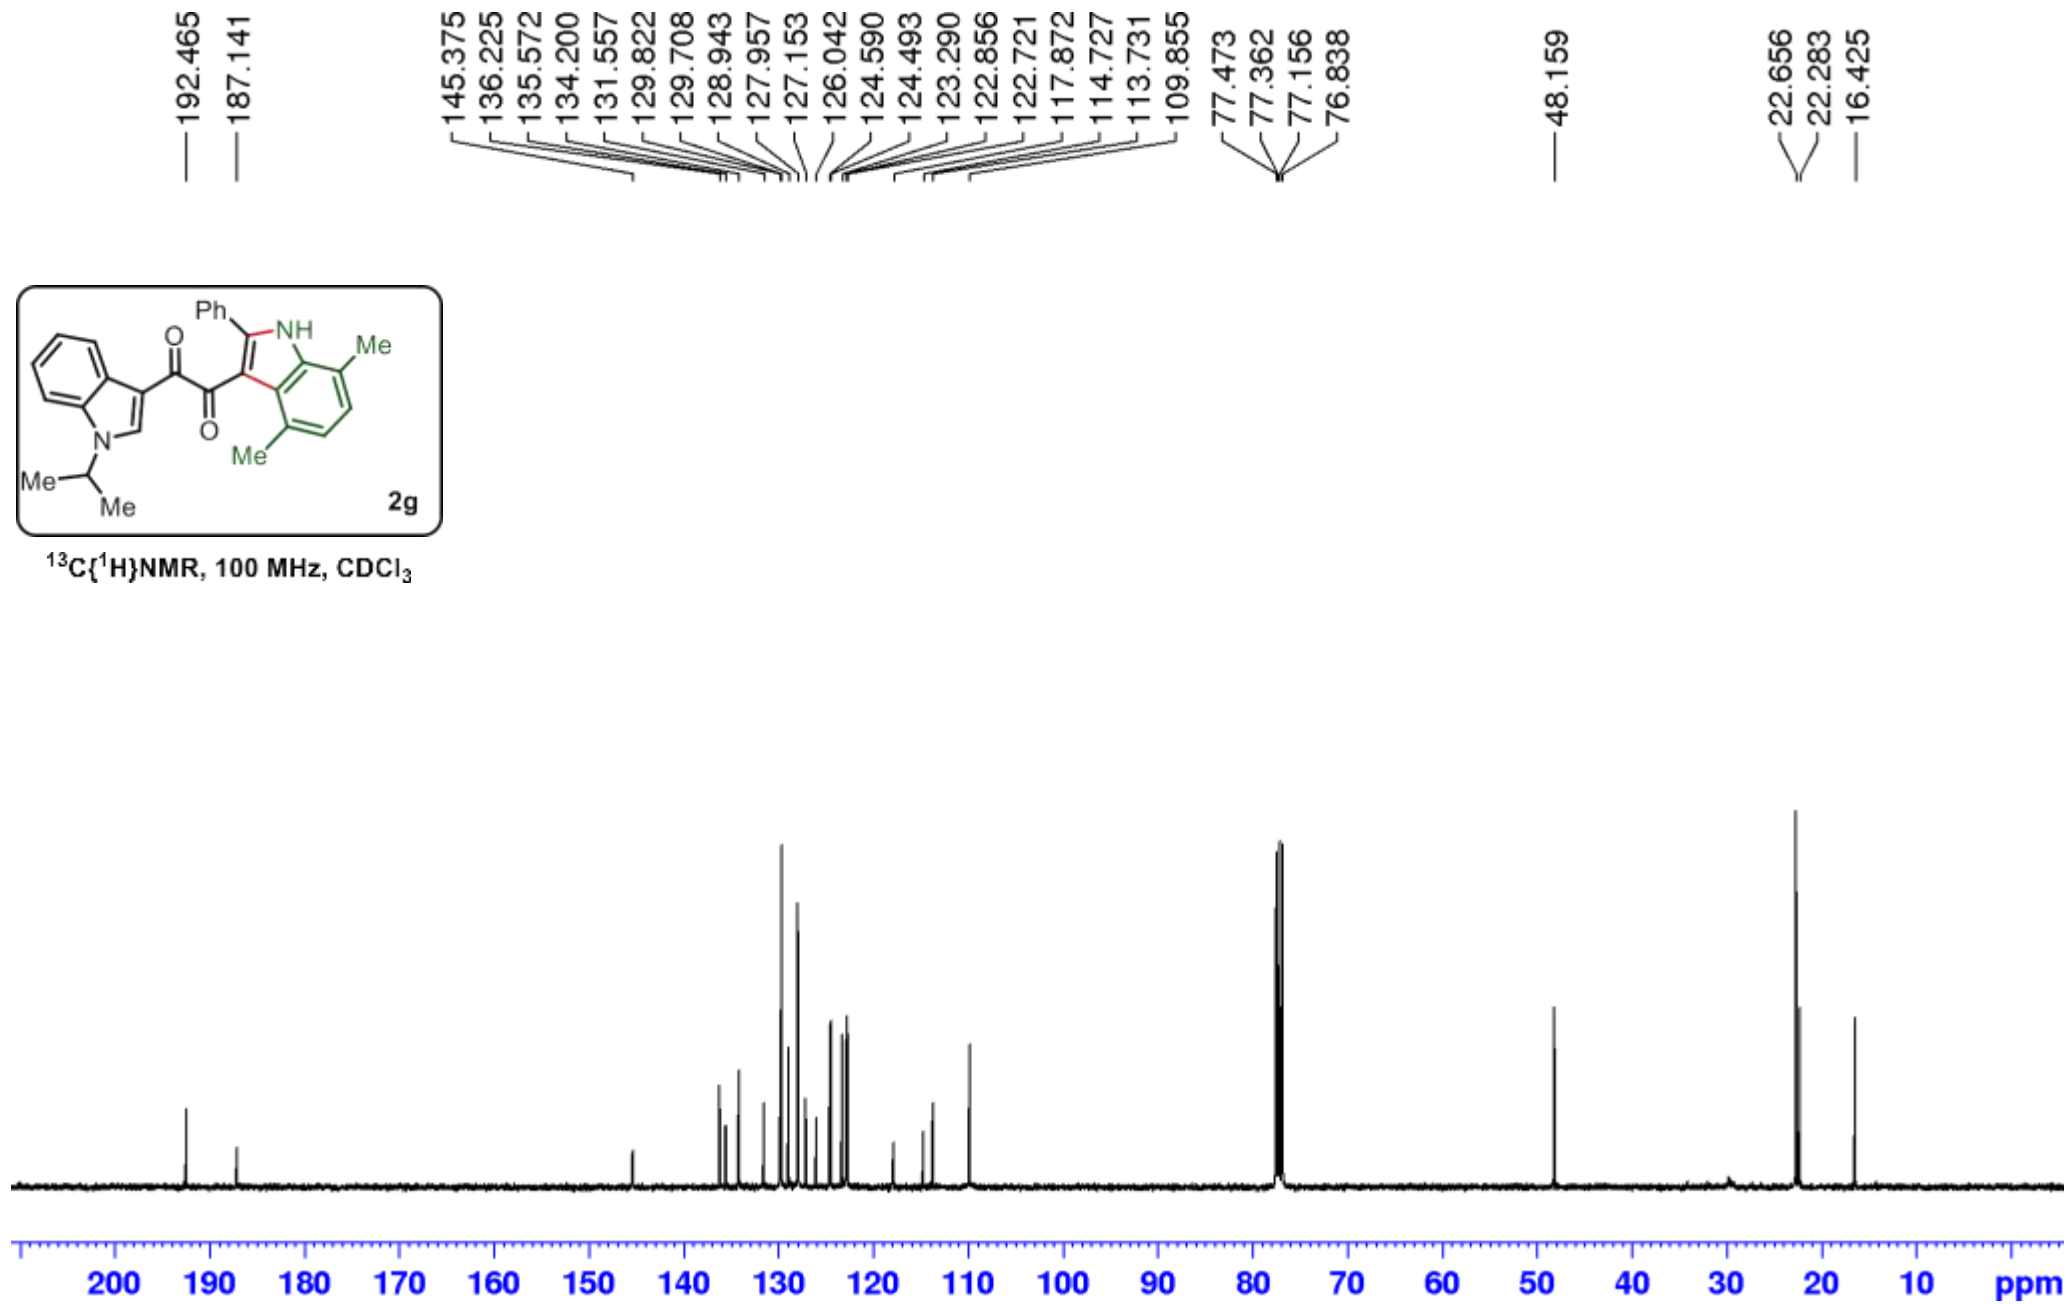

Single Mass Analysis

Tolerance = 100.0 PPM / DBE: min = -1.5, max = 50.0

Element prediction: Off

Number of isotope peaks used for i-FIT = 3

Monoisotopic Mass, Even Electron Ions

18 formula(e) evaluated with 1 results within limits (up to 3 closest results for each mass)

Elements Used:

C: 0-29 H: 0-100 N: 0-2 O: 0-2

NVD-92

QMI DIVISION, CSIR-IIIM JAMMU  
Xevo G2-XS QTOF YFC2015

06-Oct-2023  
13:59:10  
1: TOF MS ES+  
2.54e+006

061023\_13 5 (0.121)

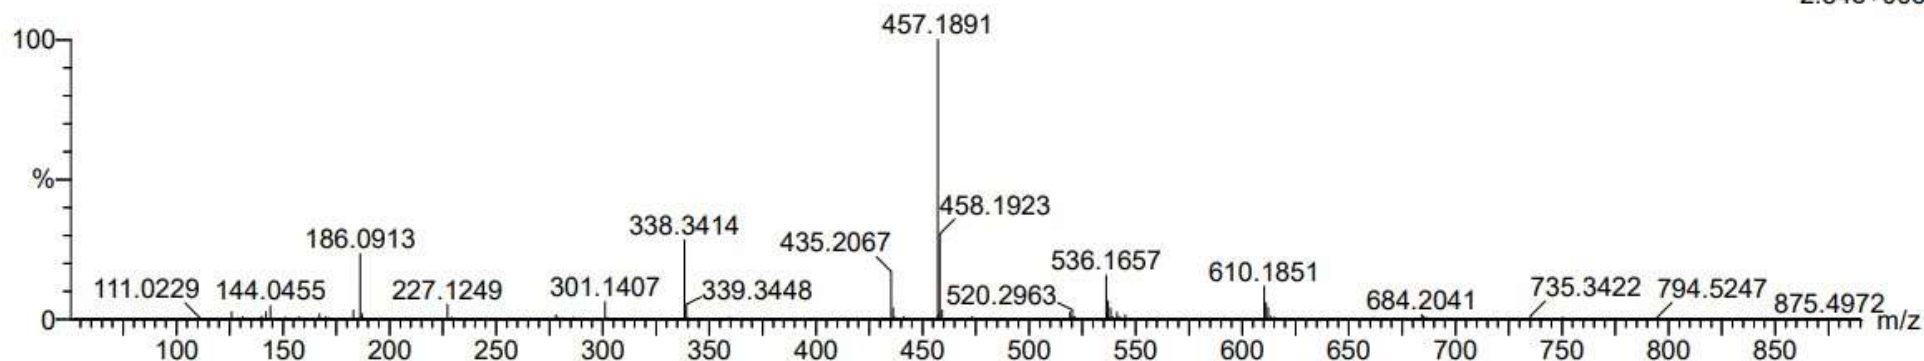

Minimum: -1.5  
Maximum: 2.0 100.0 50.0

| Mass     | Calc. Mass | mDa  | PPM  | DBE  | i-FIT | Norm | Conf (%) | Formula       |
|----------|------------|------|------|------|-------|------|----------|---------------|
| 435.2067 | 435.2073   | -0.6 | -1.4 | 17.5 | 776.1 | n/a  | n/a      | C29 H27 N2 O2 |

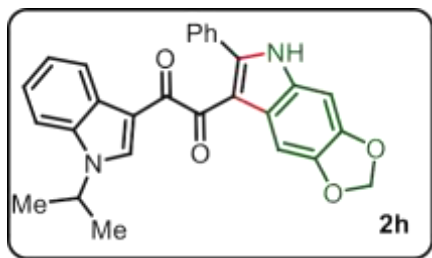

$^1\text{H NMR}$ , 400 MHz,  $\text{DMSO-d}_6$

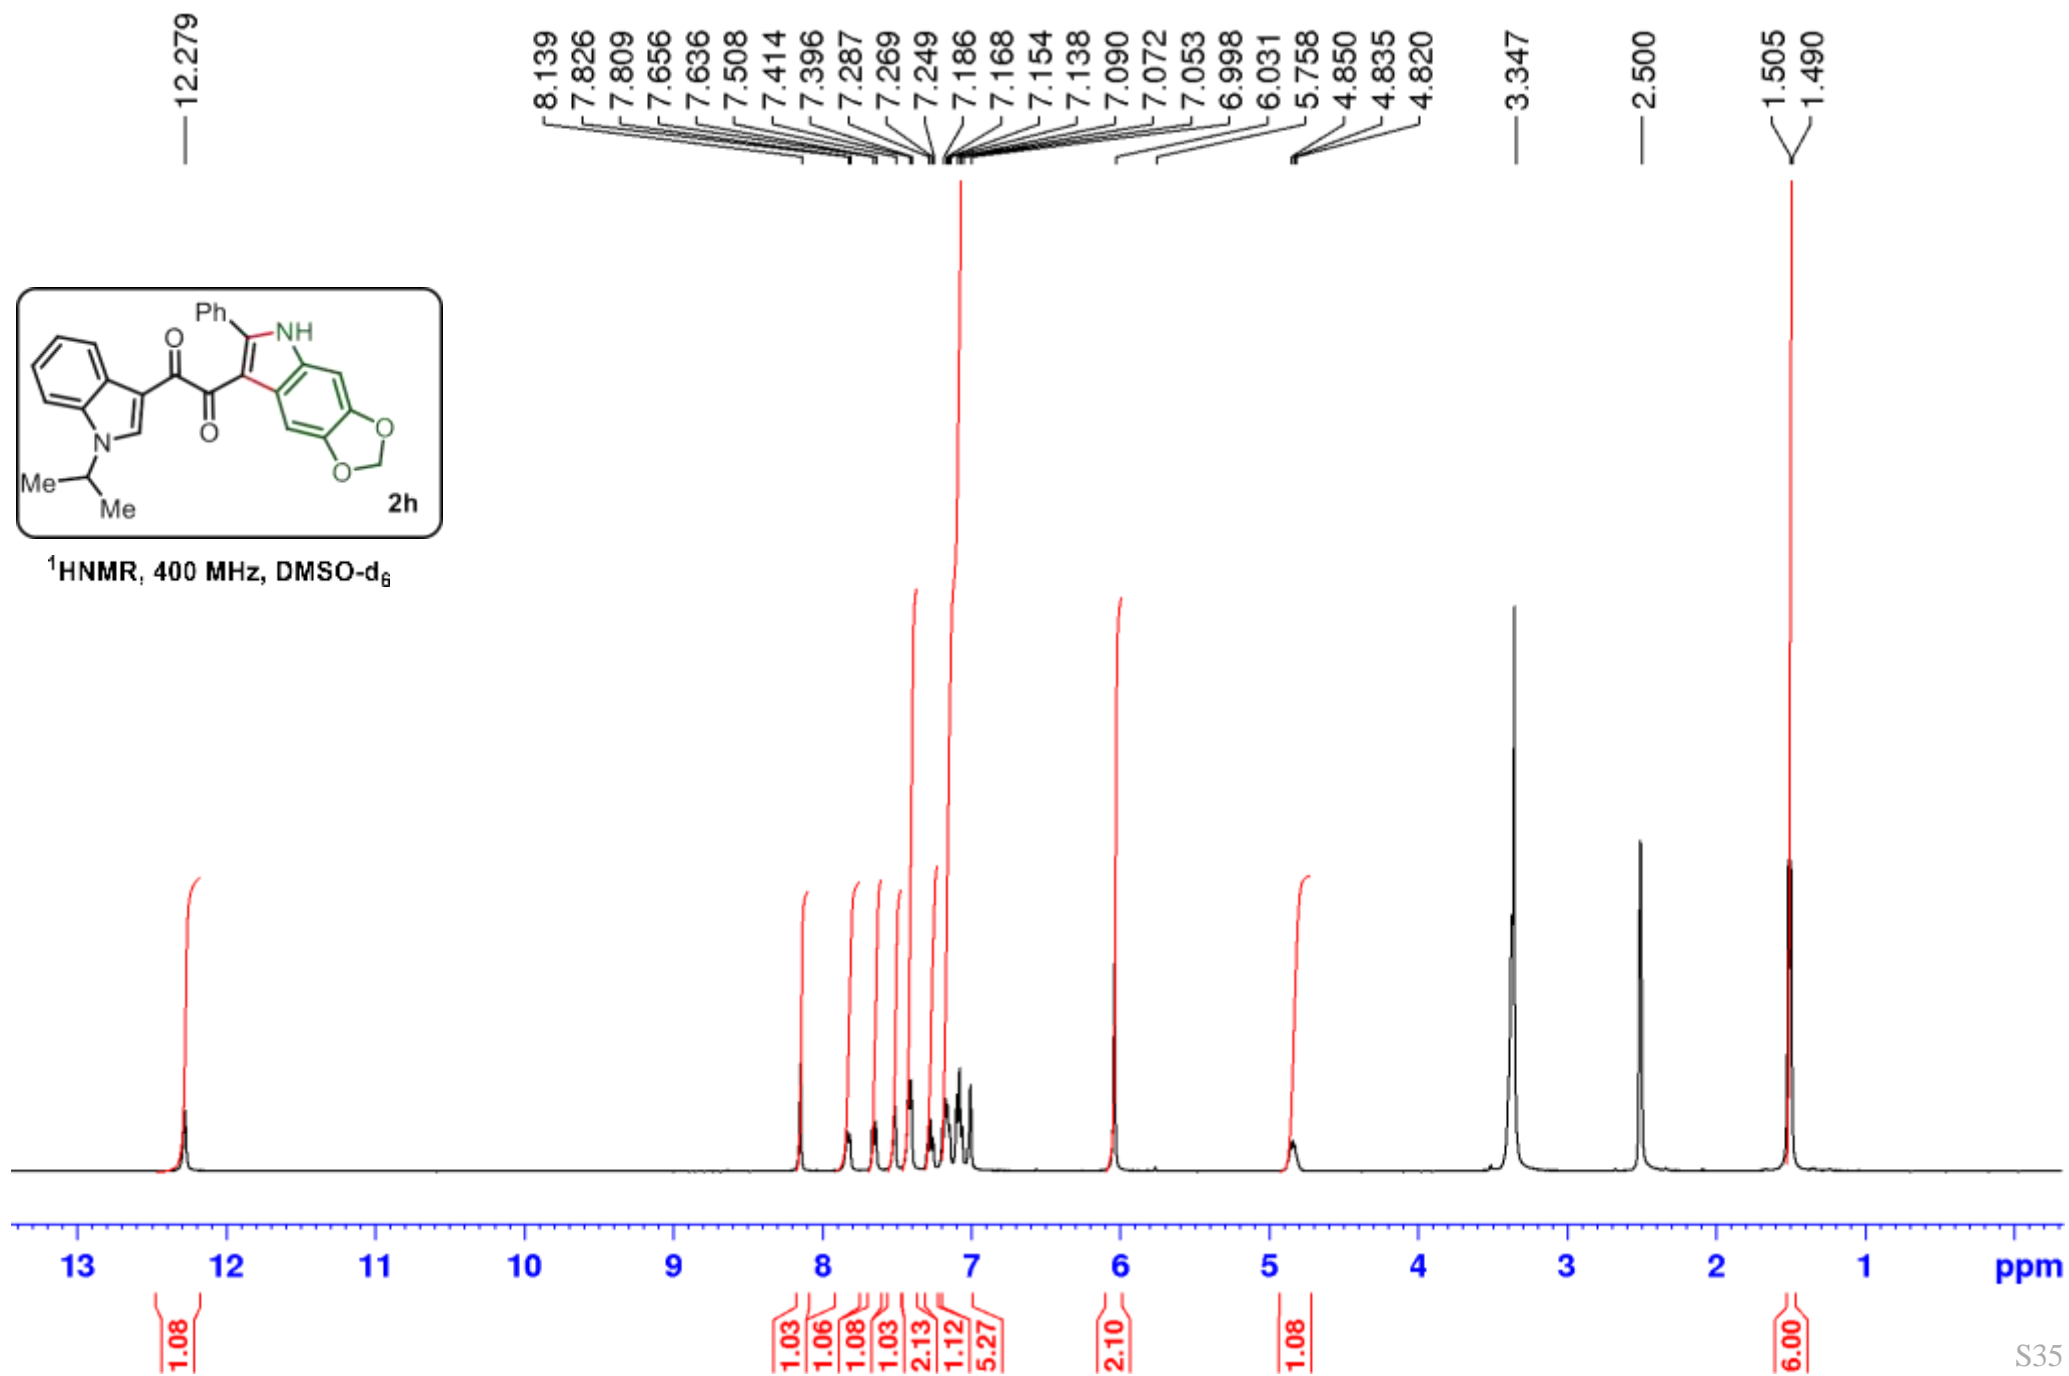

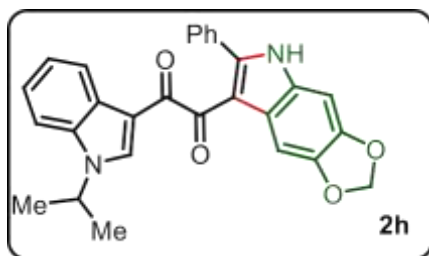

$^{13}\text{C}\{^1\text{H}\}$ NMR, 100 MHz,  $\text{DMSO-d}_6$

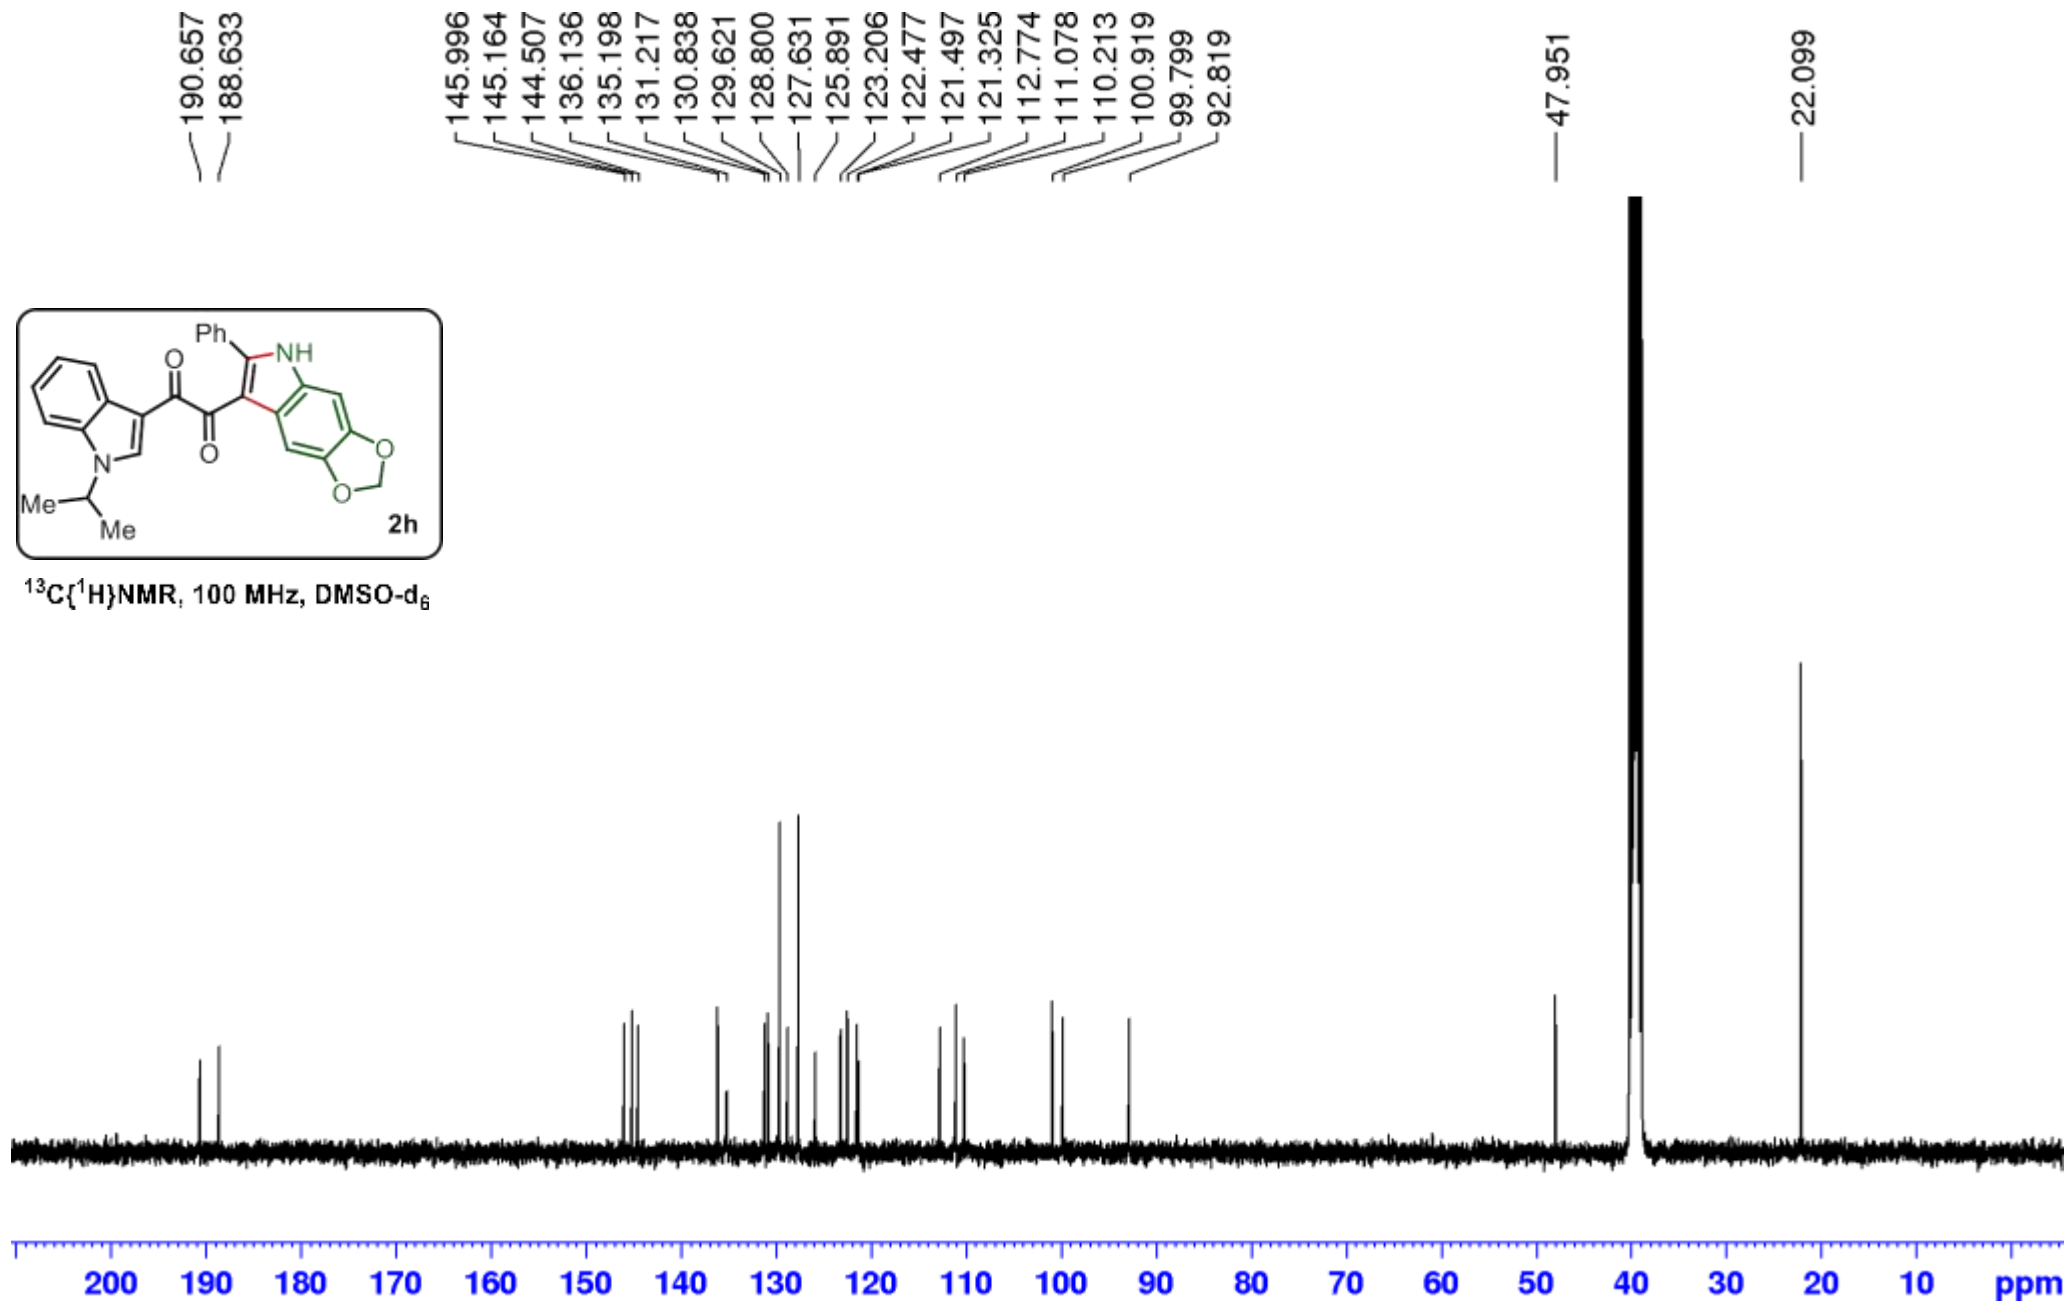

Single Mass Analysis

Tolerance = 100.0 PPM / DBE: min = -1.5, max = 50.0

Element prediction: Off

Number of isotope peaks used for i-FIT = 3

Monoisotopic Mass, Even Electron Ions

25 formula(e) evaluated with 1 results within limits (up to 3 closest results for each mass)

Elements Used:

C: 0-28 H: 0-100 N: 0-2 O: 0-4

NVD-91

QMI DIVISION, CSIR-IIIM JAMMU  
Xevo G2-XS QTOF YFC2015

06-Oct-2023

13:51:19

1: TOF MS ES+

1.75e+005

061023\_10 4 (0.104)

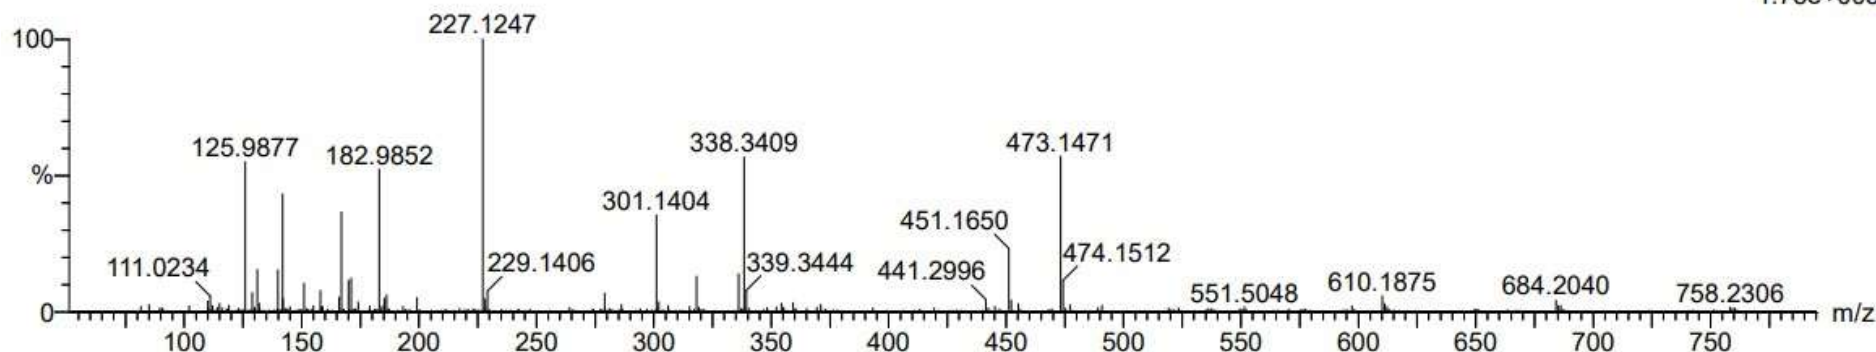

Minimum: -1.5  
Maximum: 2.0 100.0 50.0

| Mass     | Calc. Mass | mDa  | PPM  | DBE  | i-FIT | Norm | Conf (%) | Formula       |
|----------|------------|------|------|------|-------|------|----------|---------------|
| 451.1650 | 451.1658   | -0.8 | -1.8 | 18.5 | 560.1 | n/a  | n/a      | C28 H23 N2 O4 |

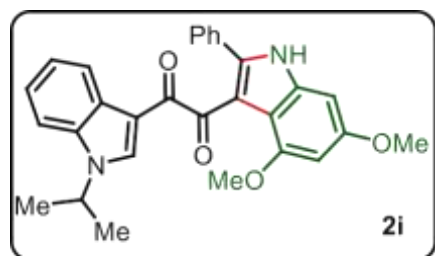

<sup>1</sup>HNMR, 400 MHz, DMSO-d<sub>6</sub>

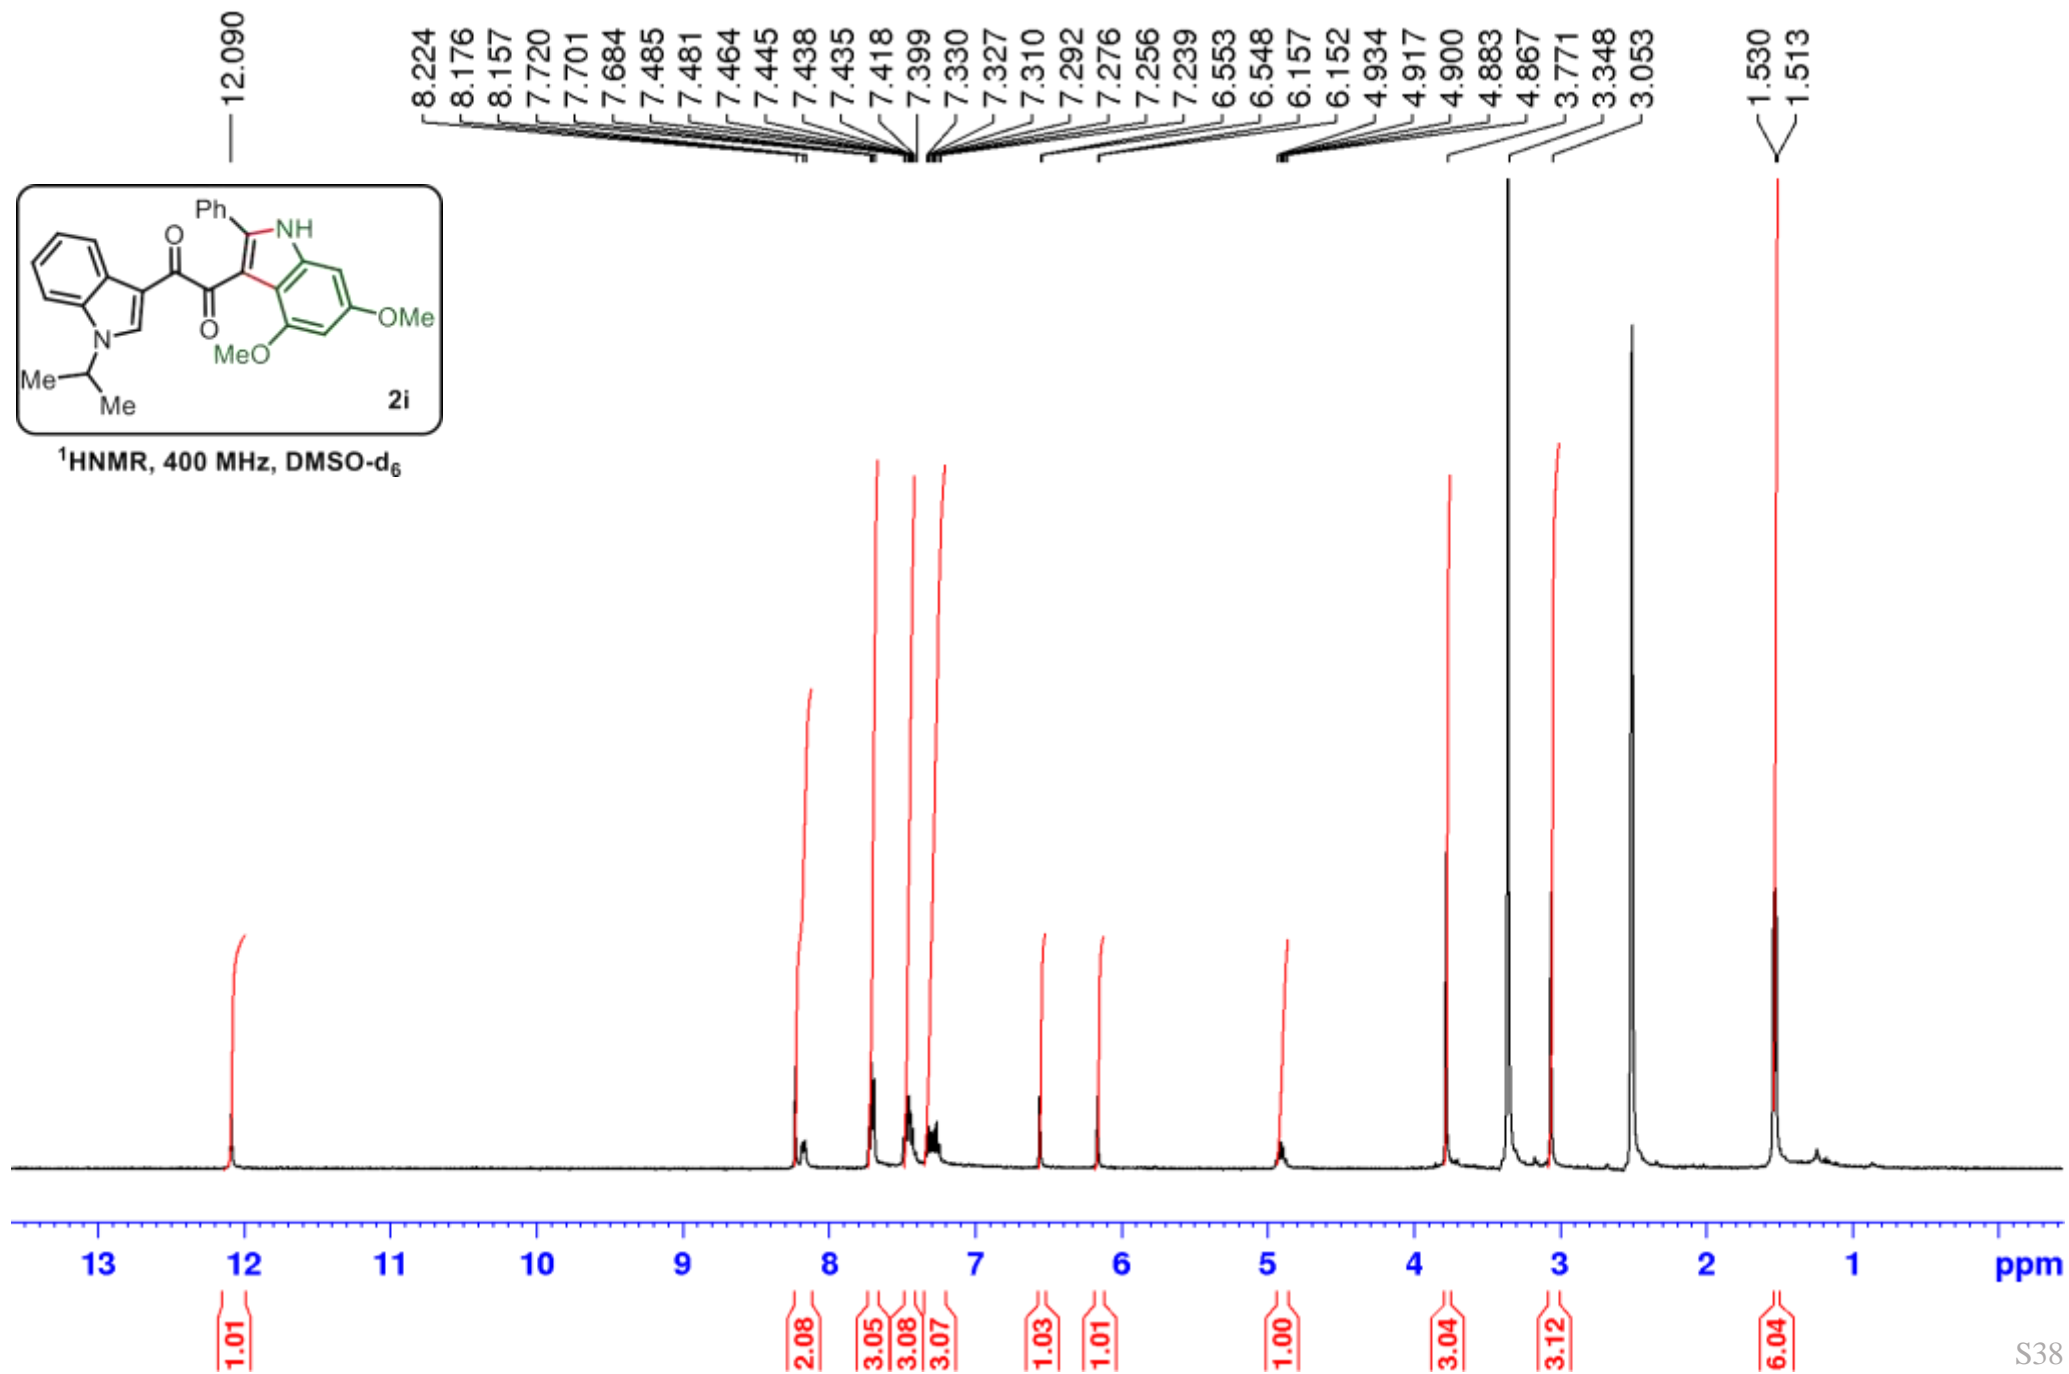

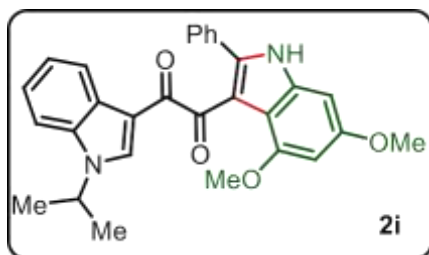

$^{13}\text{C}\{^1\text{H}\}$ NMR, 100 MHz,  $\text{CDCl}_3$

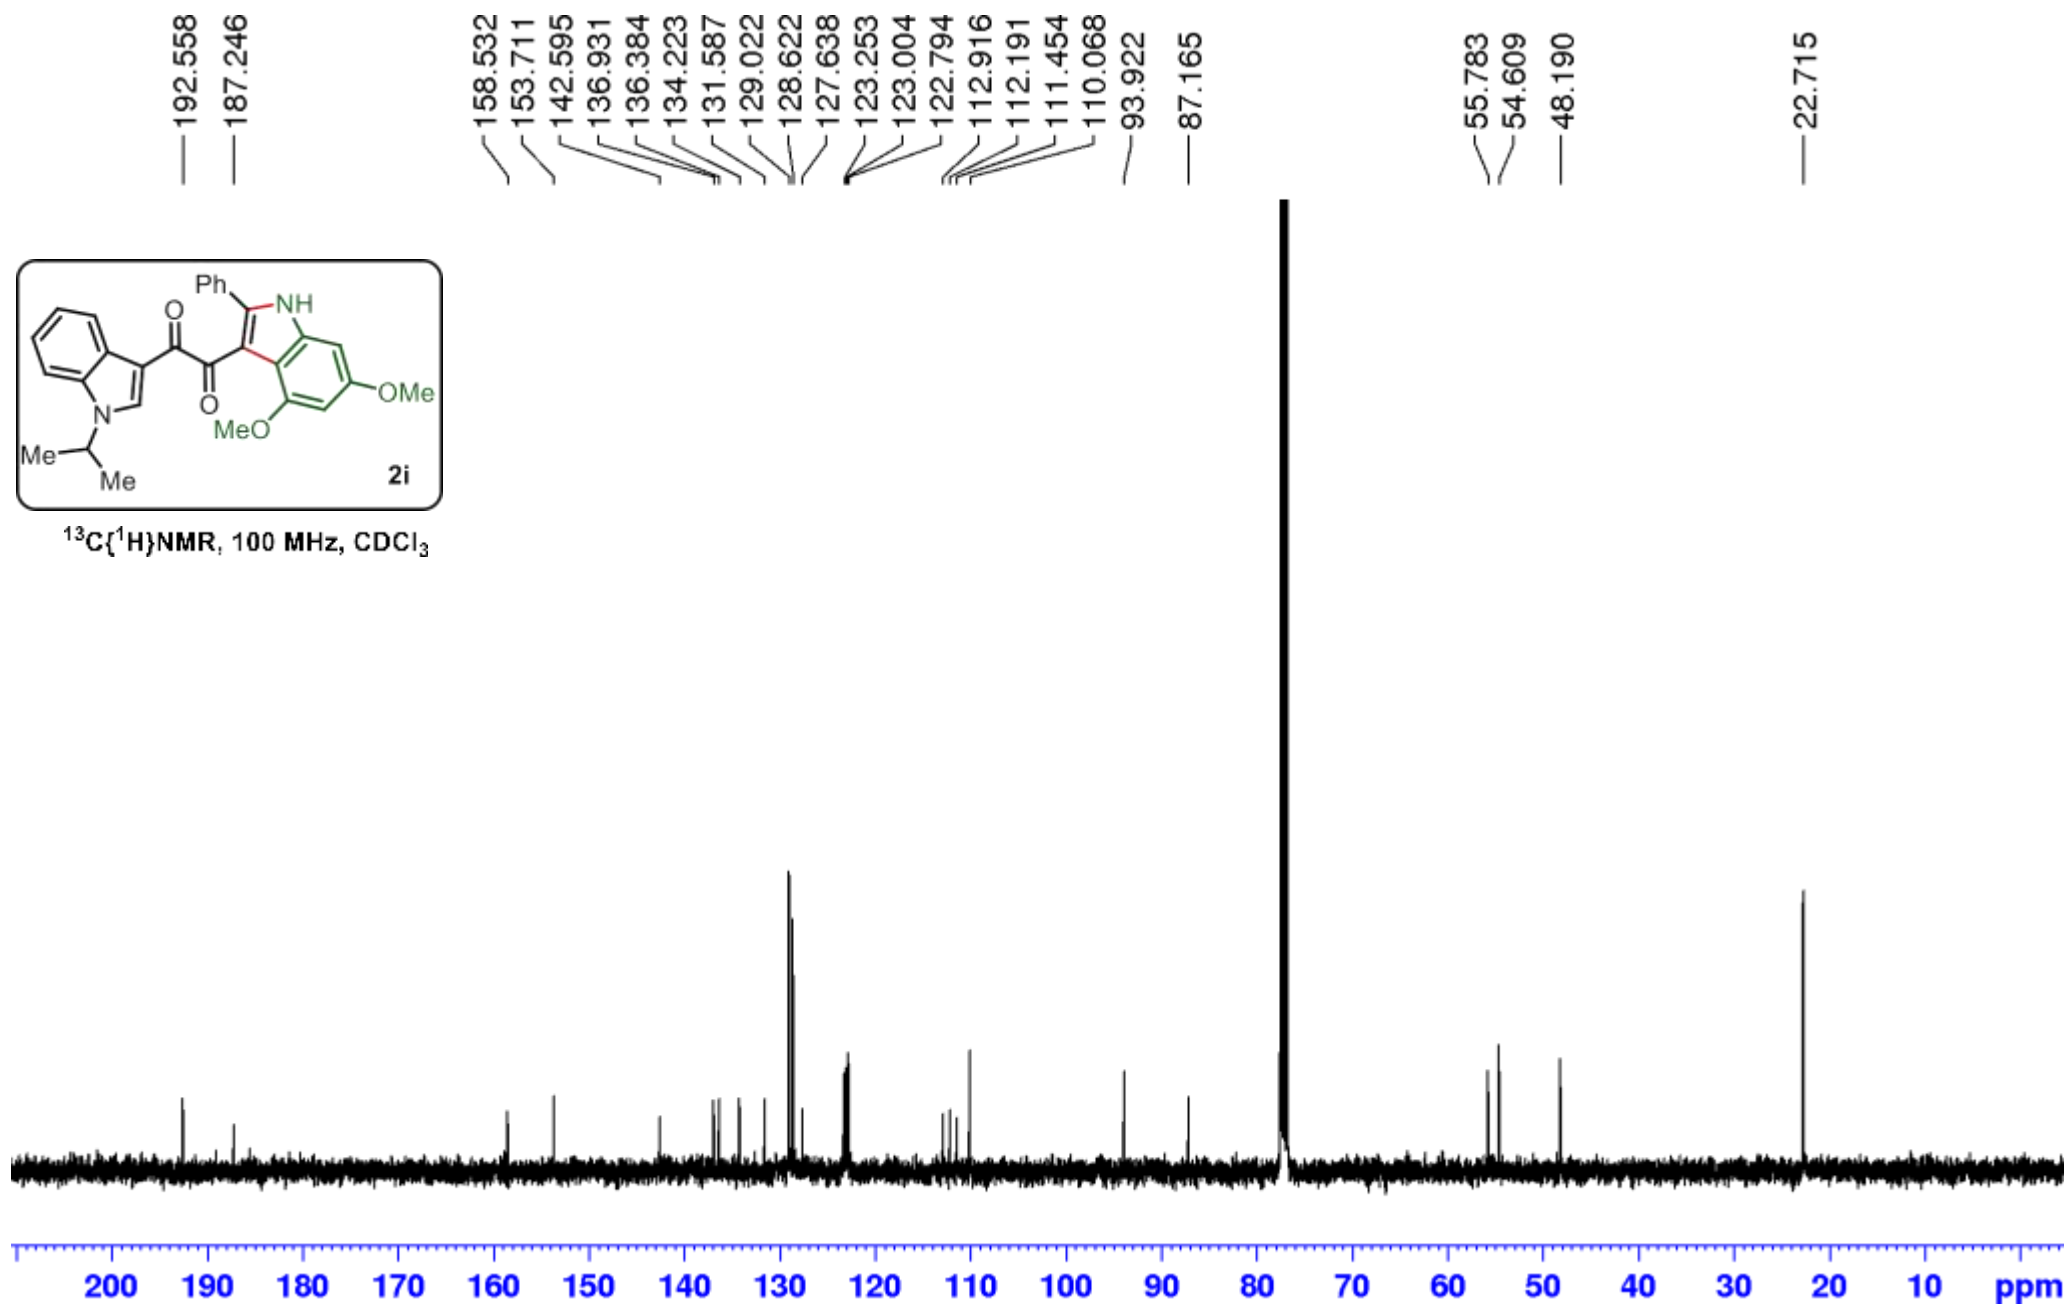

# Elemental Composition Report

## Single Mass Analysis

Tolerance = 10.0 PPM / DBE: min = -1.5, max = 50.0

Element prediction: Off

Number of isotope peaks used for i-FIT = 3

Monoisotopic Mass, Even Electron Ions

24 formula(e) evaluated with 1 results within limits (up to 3 closest results for each mass)

Elements Used:

C: 0-29 H: 0-100 N: 0-2 O: 0-4

NVD-67

QMI DIVISION, CSIR-IIIM JAMMU  
Xevo G2-XS QTOF YFC2015

04-Mar-2024  
13:41:47  
1: TOF MS ES+  
9.05e+005

040324\_12 8 (0.172) Cm (8)

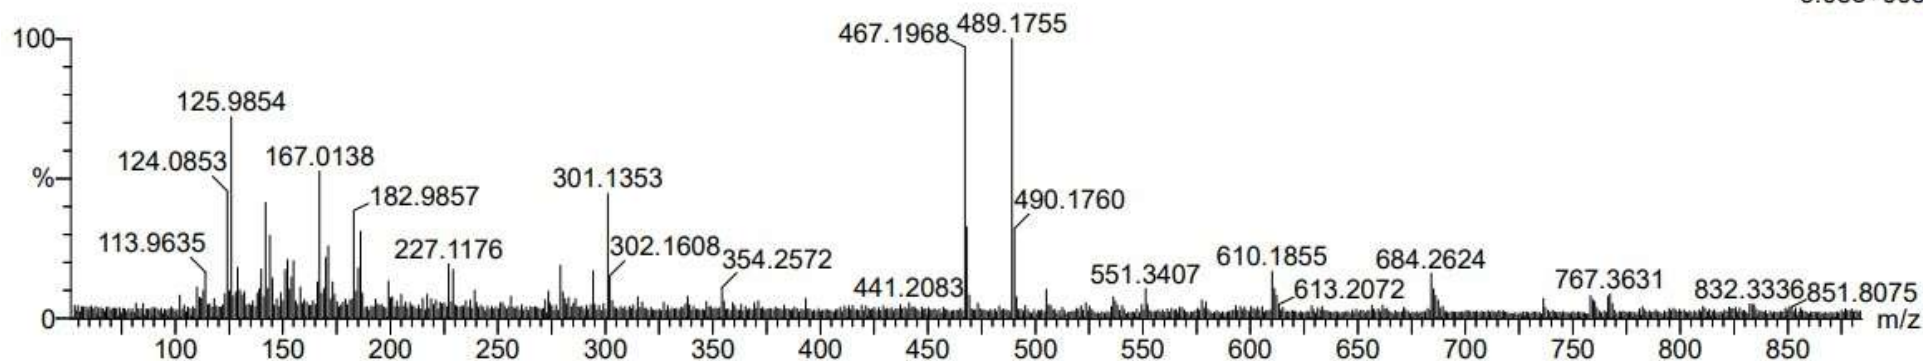

Minimum: -1.5  
Maximum: 2.0 10.0 50.0

| Mass     | Calc. Mass | mDa  | PPM  | DBE  | i-FIT | Norm | Conf(%) | Formula       |
|----------|------------|------|------|------|-------|------|---------|---------------|
| 467.1968 | 467.1971   | -0.3 | -0.6 | 17.5 | 31.9  | n/a  | n/a     | C29 H27 N2 O4 |



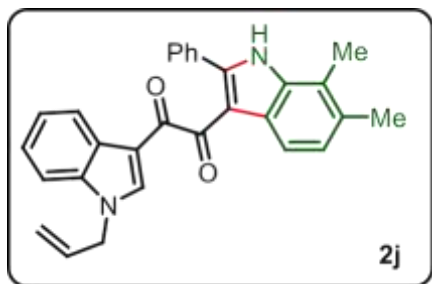

$^1\text{H NMR}$ , 400 MHz,  $\text{DMSO-d}_6$

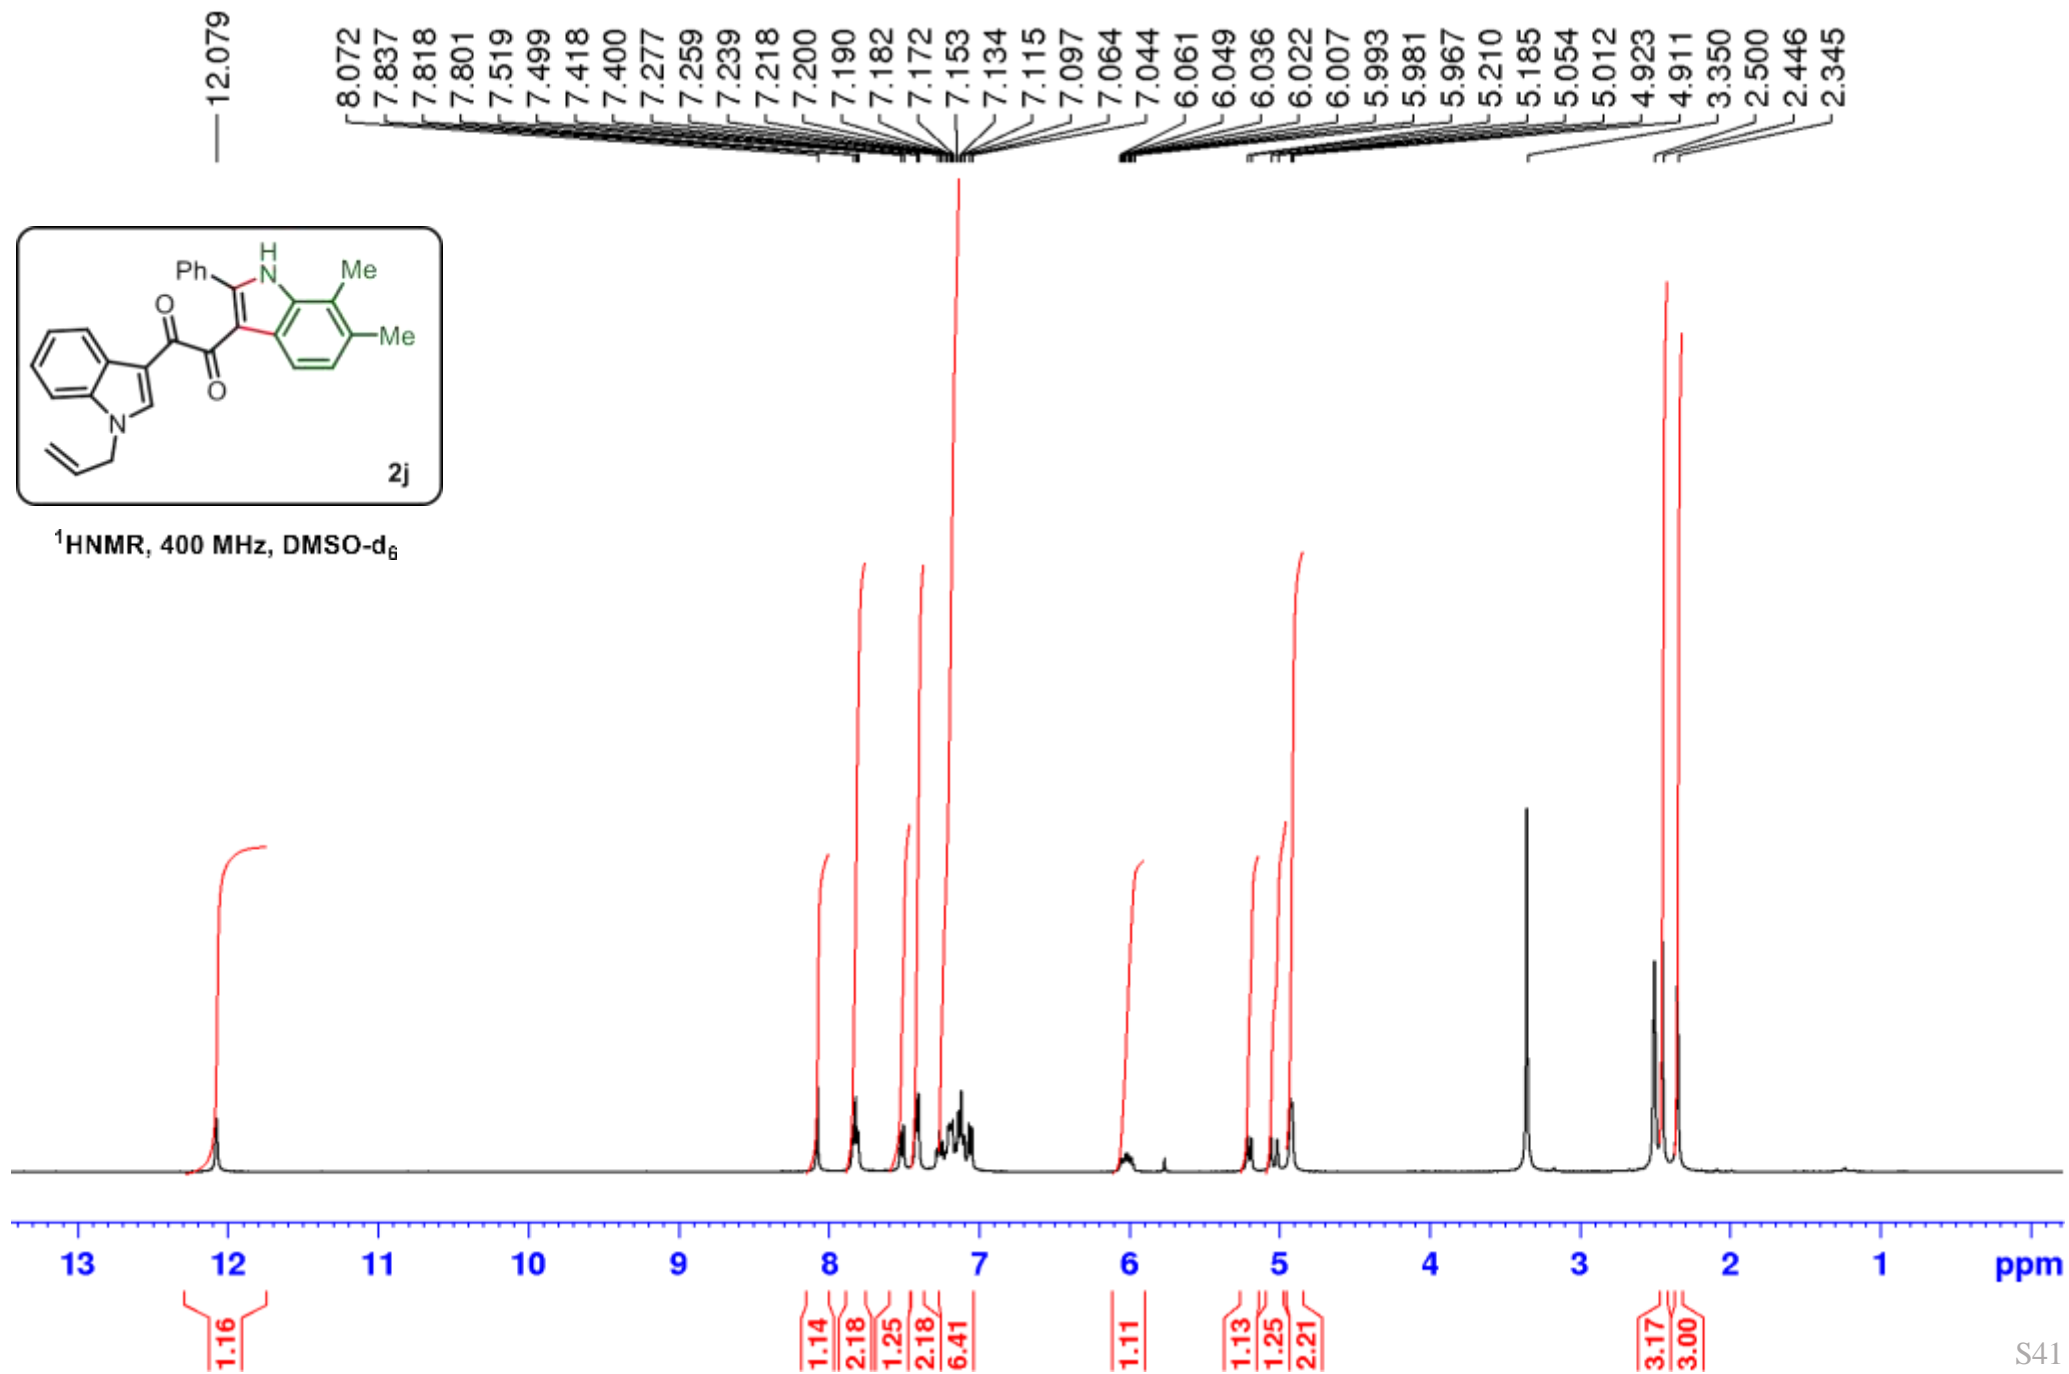

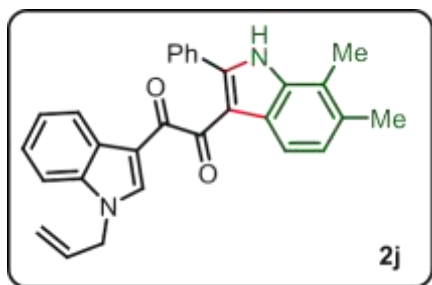

$^{13}\text{C}\{^1\text{H}\}$ NMR, 100 MHz,  $\text{CDCl}_3$

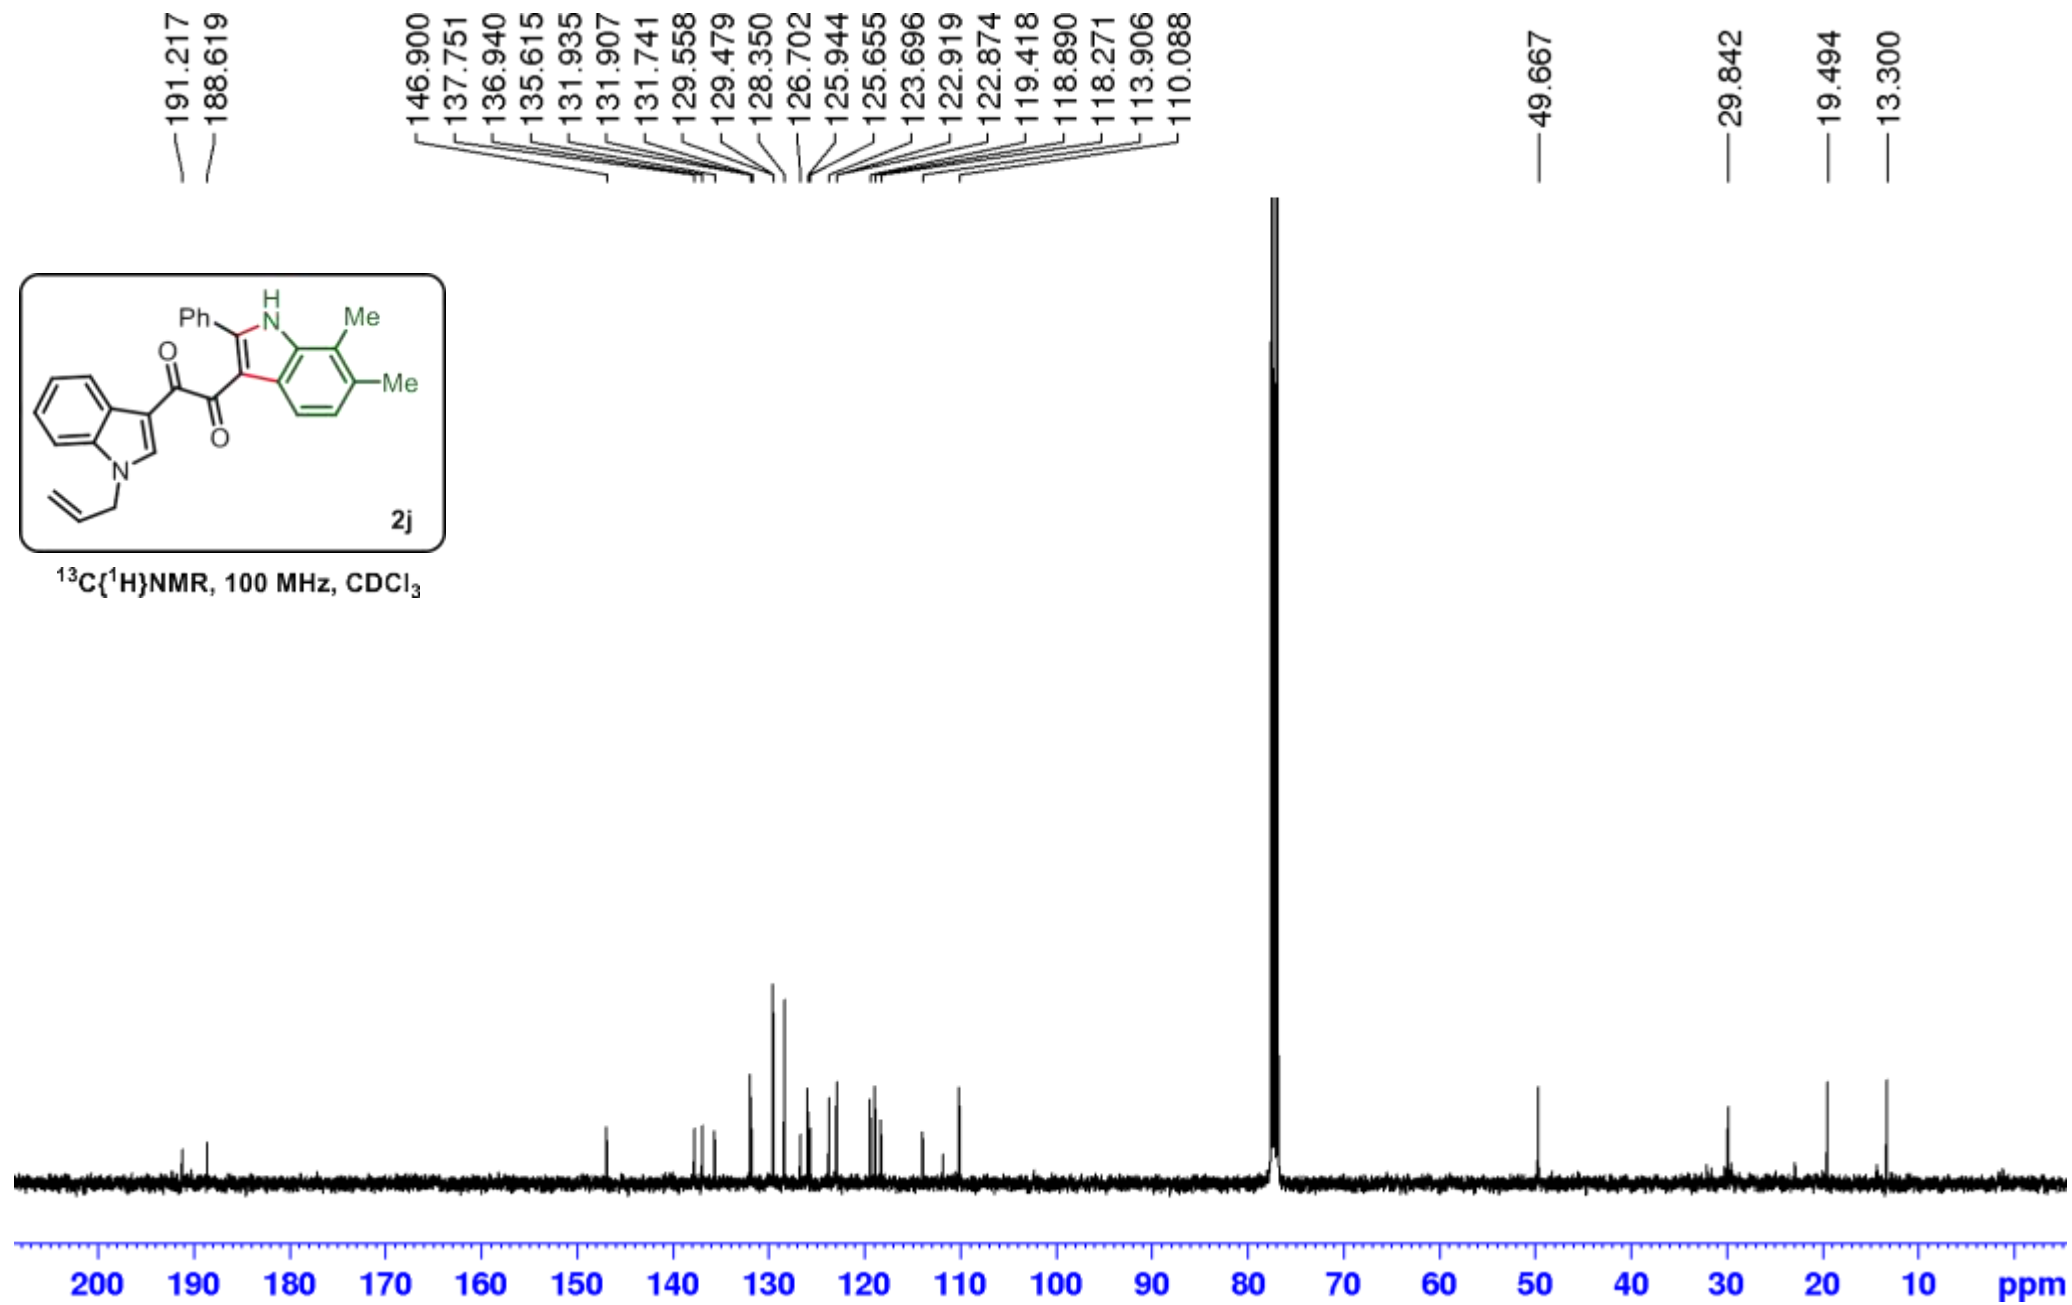

# Elemental Composition Report

## Single Mass Analysis

Tolerance = 50.0 PPM / DBE: min = -1.5, max = 50.0

Element prediction: Off

Number of isotope peaks used for i-FIT = 3

Monoisotopic Mass, Even Electron Ions

19 formula(e) evaluated with 1 results within limits (up to 3 closest results for each mass)

Elements Used:

C: 0-29 H: 0-100 N: 0-2 O: 0-2

NVD-99

QMI DIVISION, CSIR-IIIM JAMMU  
Xevo G2-XS QTOF YFC2015

03-May-2024

14:07:23

1: TOF MS ES+

6.72e+006

030524\_13 5 (0.121)

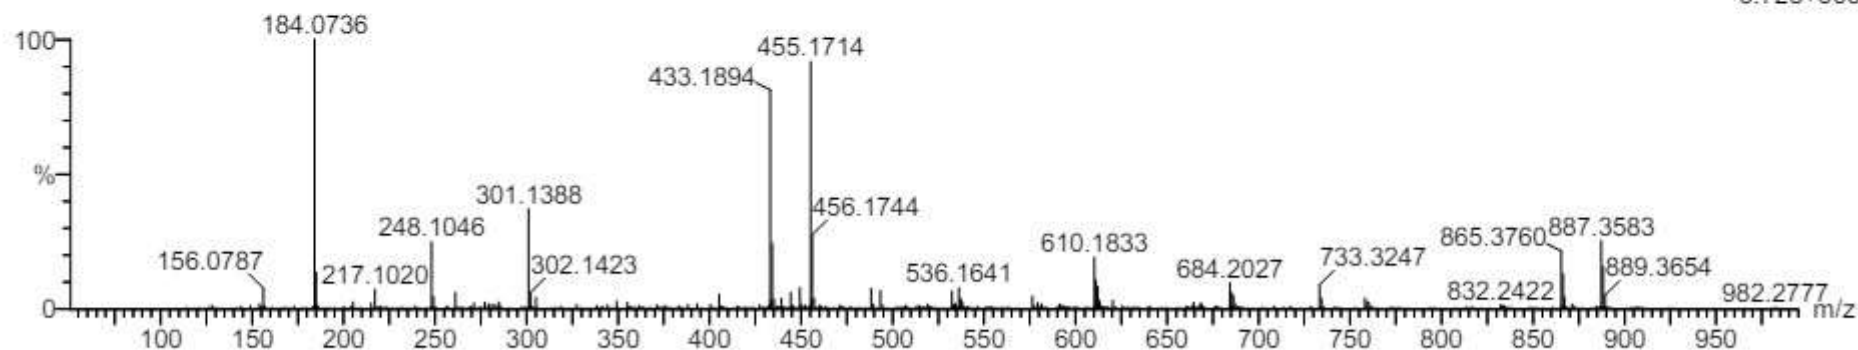

Minimum: -1.5  
Maximum: 2.0 50.0 50.0

| Mass     | Calc. Mass | mDa  | PPM  | DBE  | i-FIT  | Norm | Conf (%) | Formula       |
|----------|------------|------|------|------|--------|------|----------|---------------|
| 433.1894 | 433.1916   | -2.2 | -5.1 | 18.5 | 1064.0 | n/a  | n/a      | C29 H25 N2 O2 |

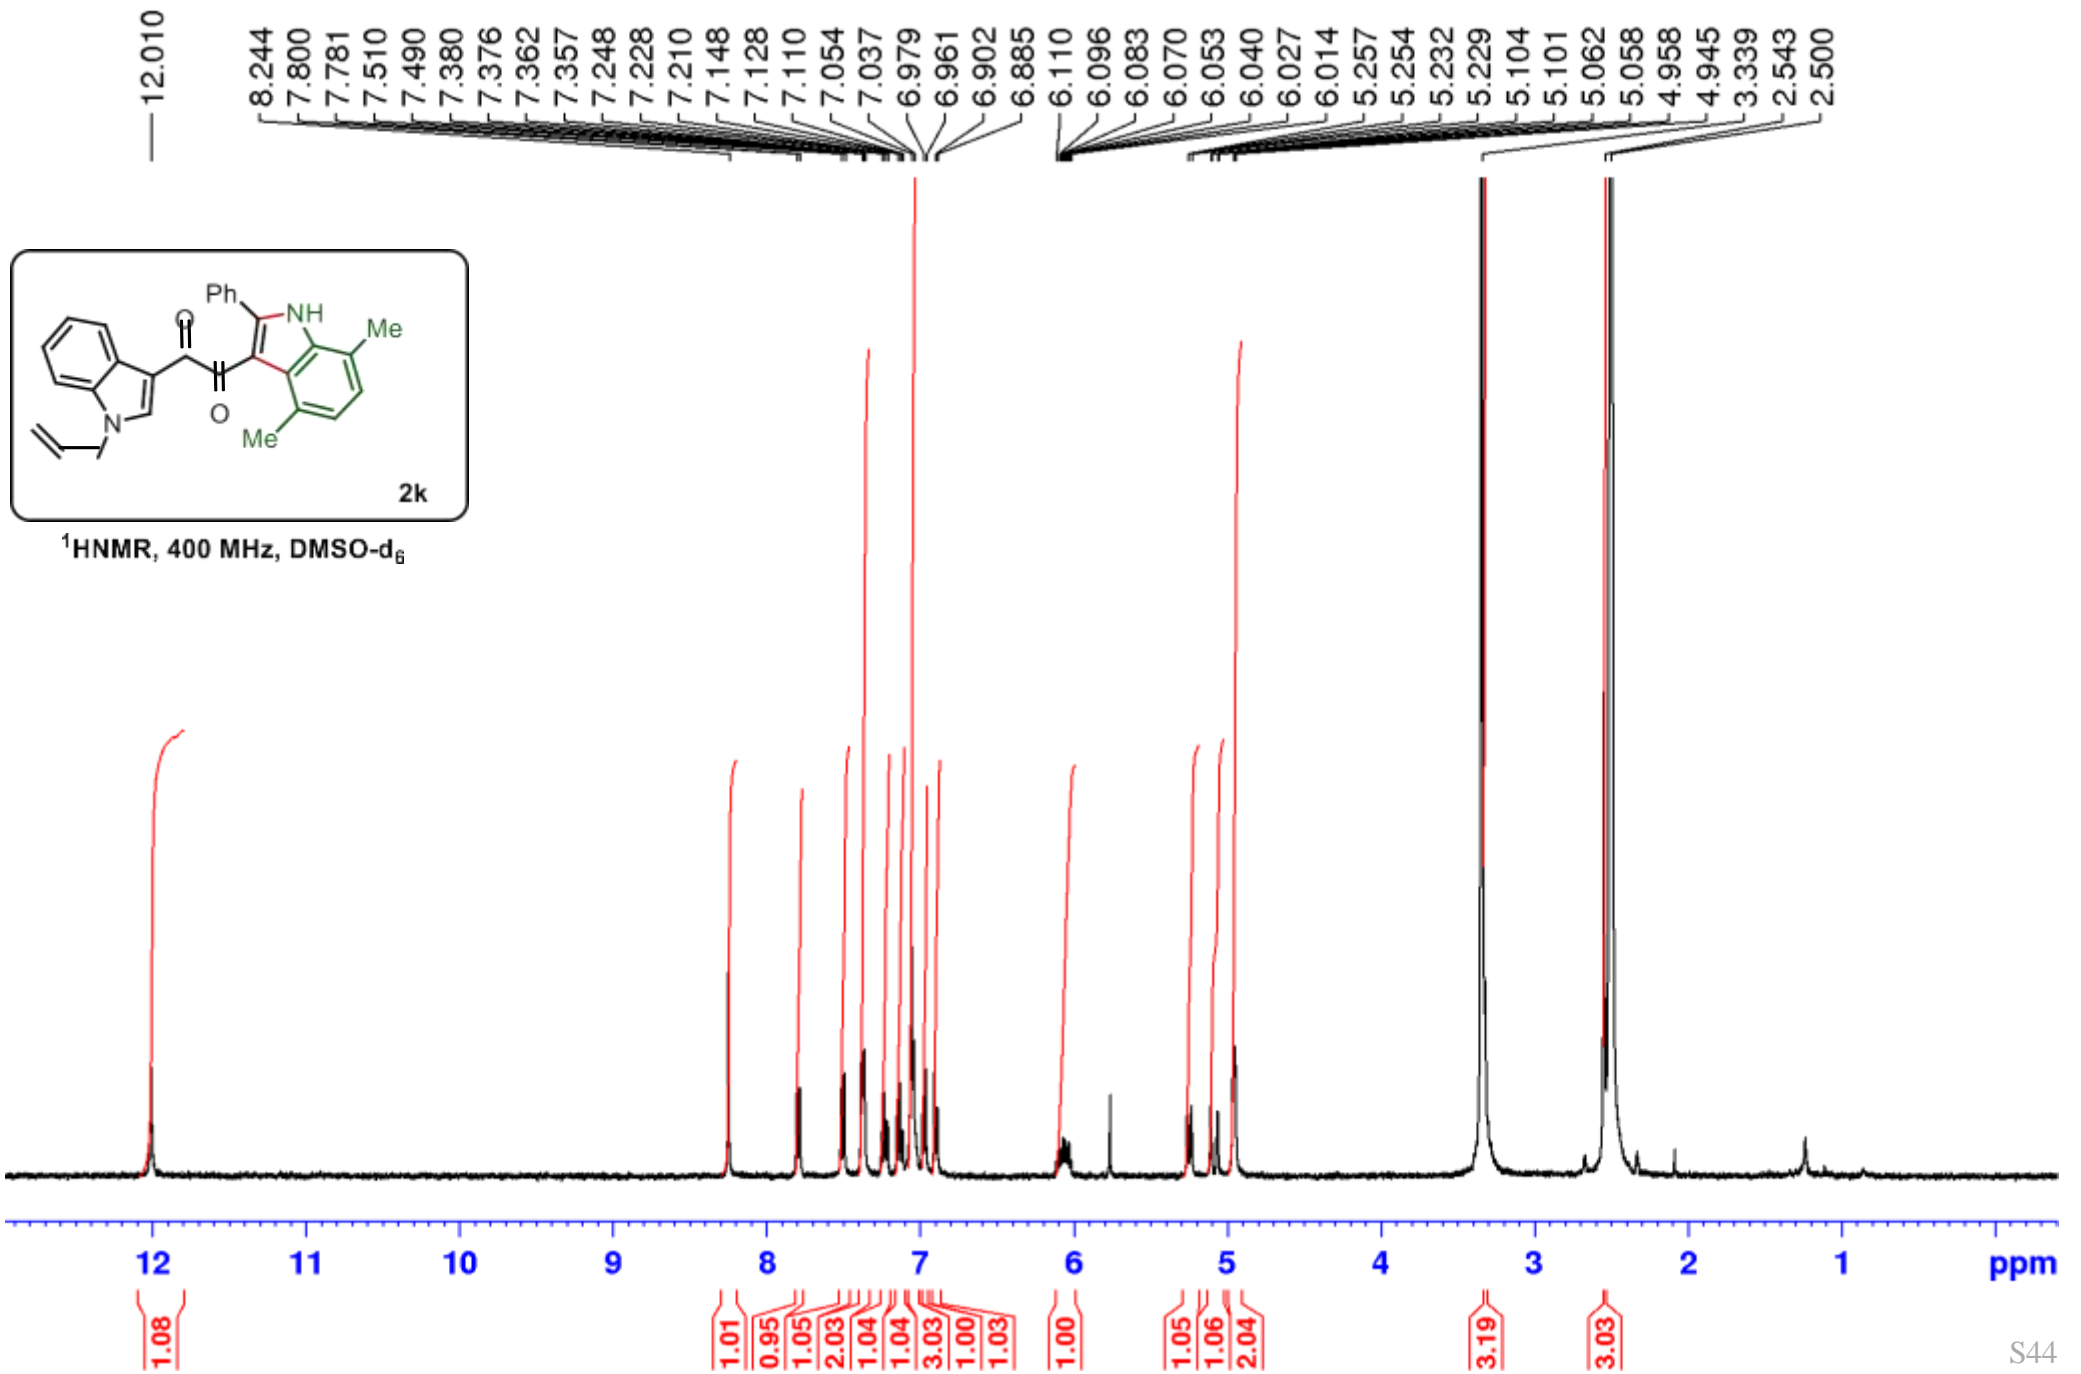

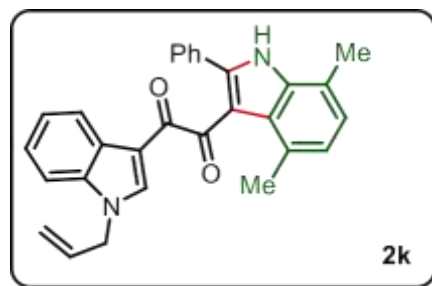

$^{13}\text{C}\{^1\text{H}\}\text{NMR}$ , 100 MHz,  $\text{CDCl}_3$

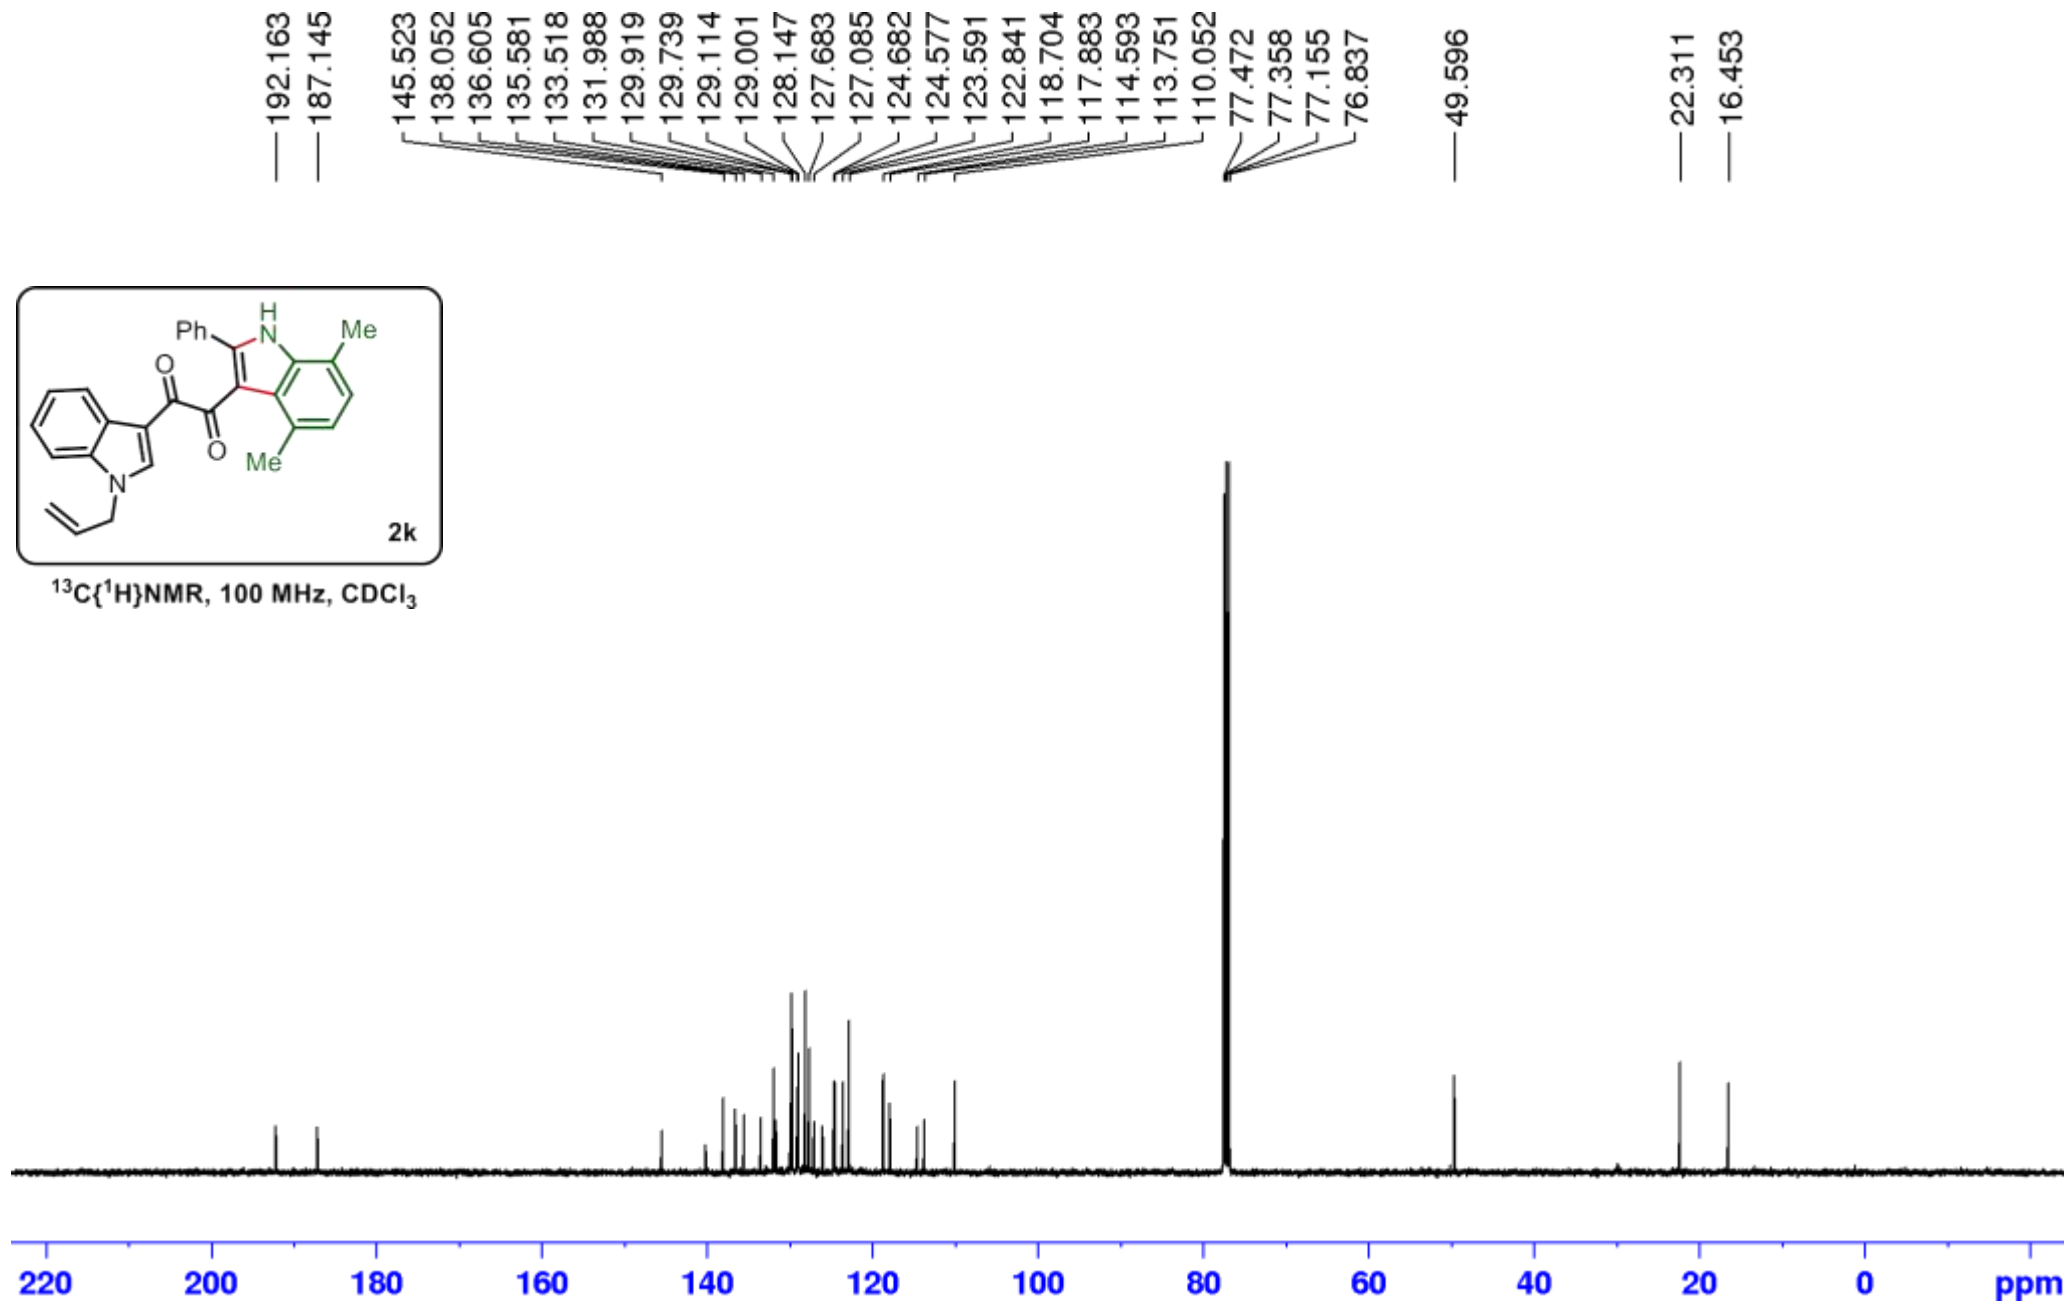

# Elemental Composition Report

## Single Mass Analysis

Tolerance = 100.0 PPM / DBE: min = -1.5, max = 50.0

Element prediction: Off

Number of isotope peaks used for i-FIT = 3

Monoisotopic Mass, Even Electron Ions

19 formula(e) evaluated with 1 results within limits (up to 3 closest results for each mass)

Elements Used:

C: 0-29 H: 0-100 N: 0-2 O: 0-2

NVD-89

QMI DIVISION, CSIR-IIIM JAMMU  
Xevo G2-XS QTOF YFC2015

06-Oct-2023

13:56:35

1: TOF MS ES+

5.58e+006

061023\_12 5 (0.121)

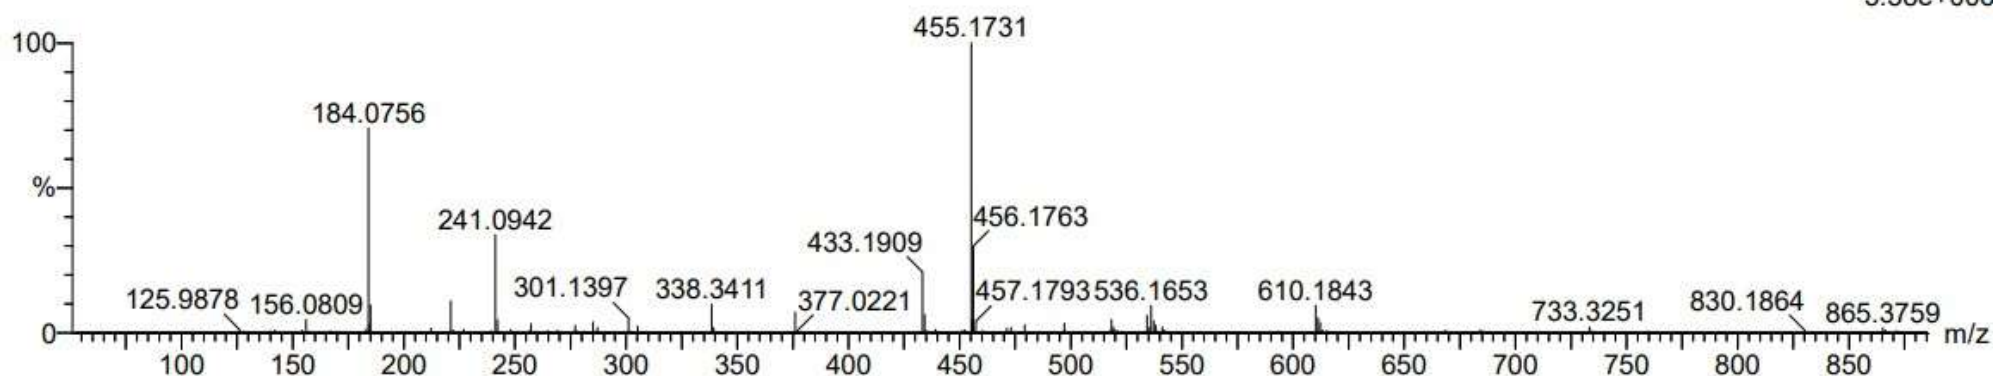

Minimum: -1.5

Maximum: 2.0 100.0 50.0

| Mass     | Calc. Mass | mDa  | PPM  | DBE  | i-FIT | Norm | Conf (%) | Formula       |
|----------|------------|------|------|------|-------|------|----------|---------------|
| 433.1909 | 433.1916   | -0.7 | -1.6 | 18.5 | 777.3 | n/a  | n/a      | C29 H25 N2 O2 |

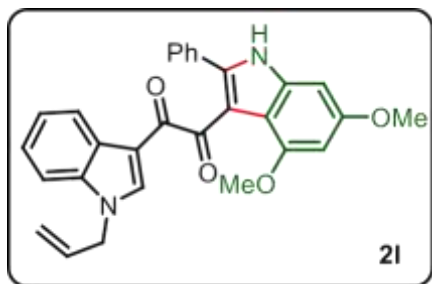

$^1\text{H NMR}$ , 400 MHz,  $\text{DMSO-d}_6$

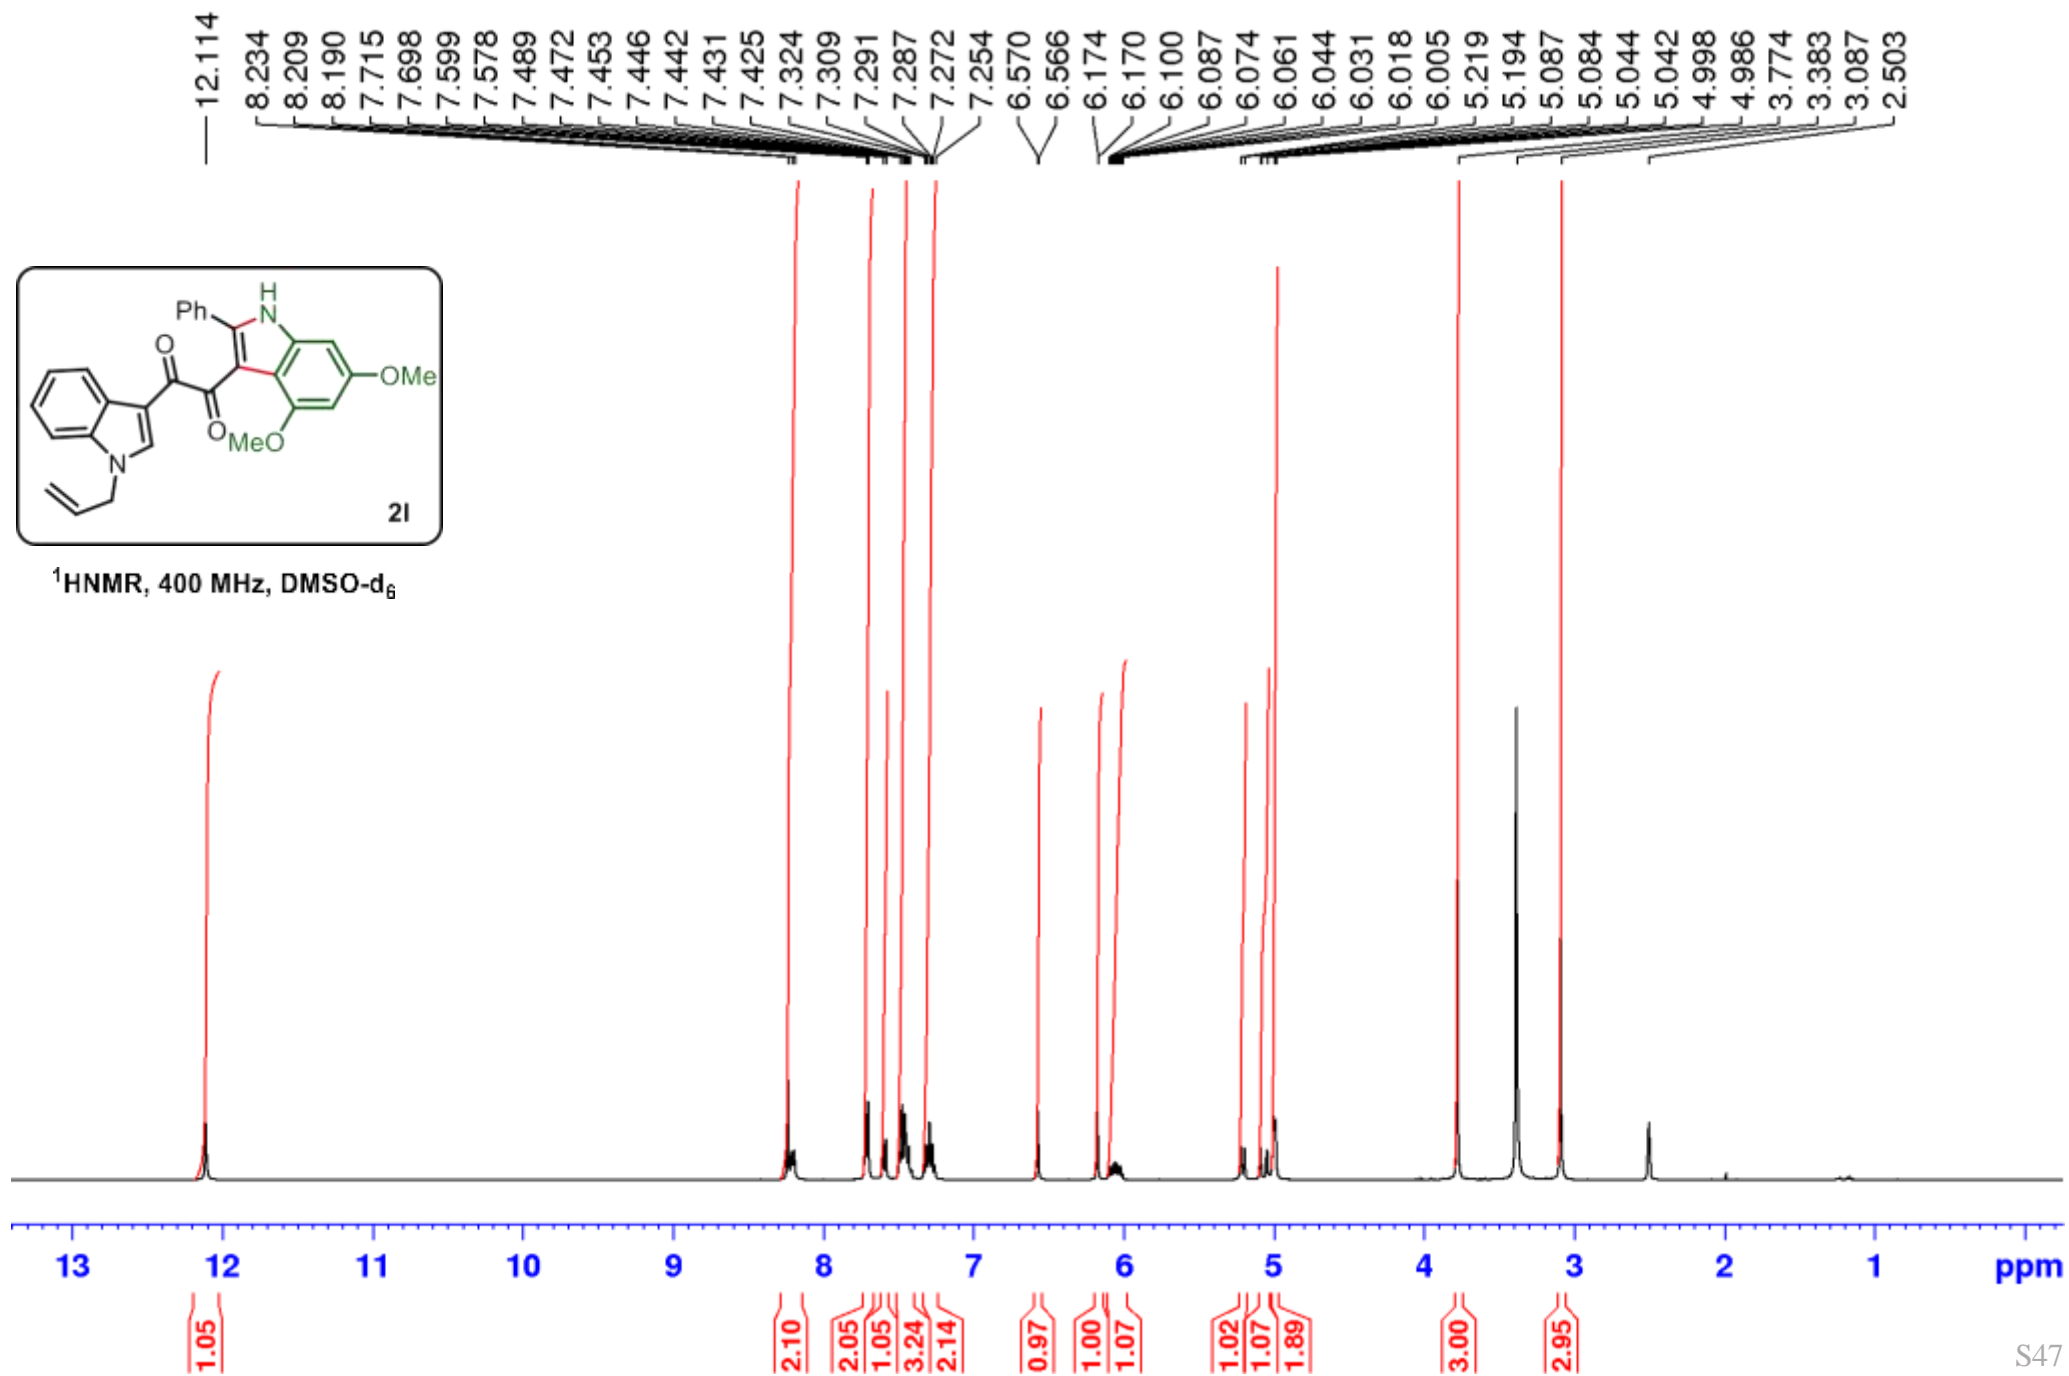

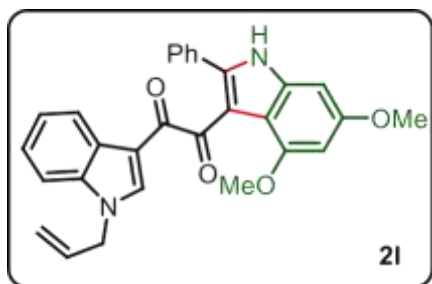

$^{13}\text{C}\{^1\text{H}\}\text{NMR}$ , 100 MHz,  $\text{CDCl}_3$

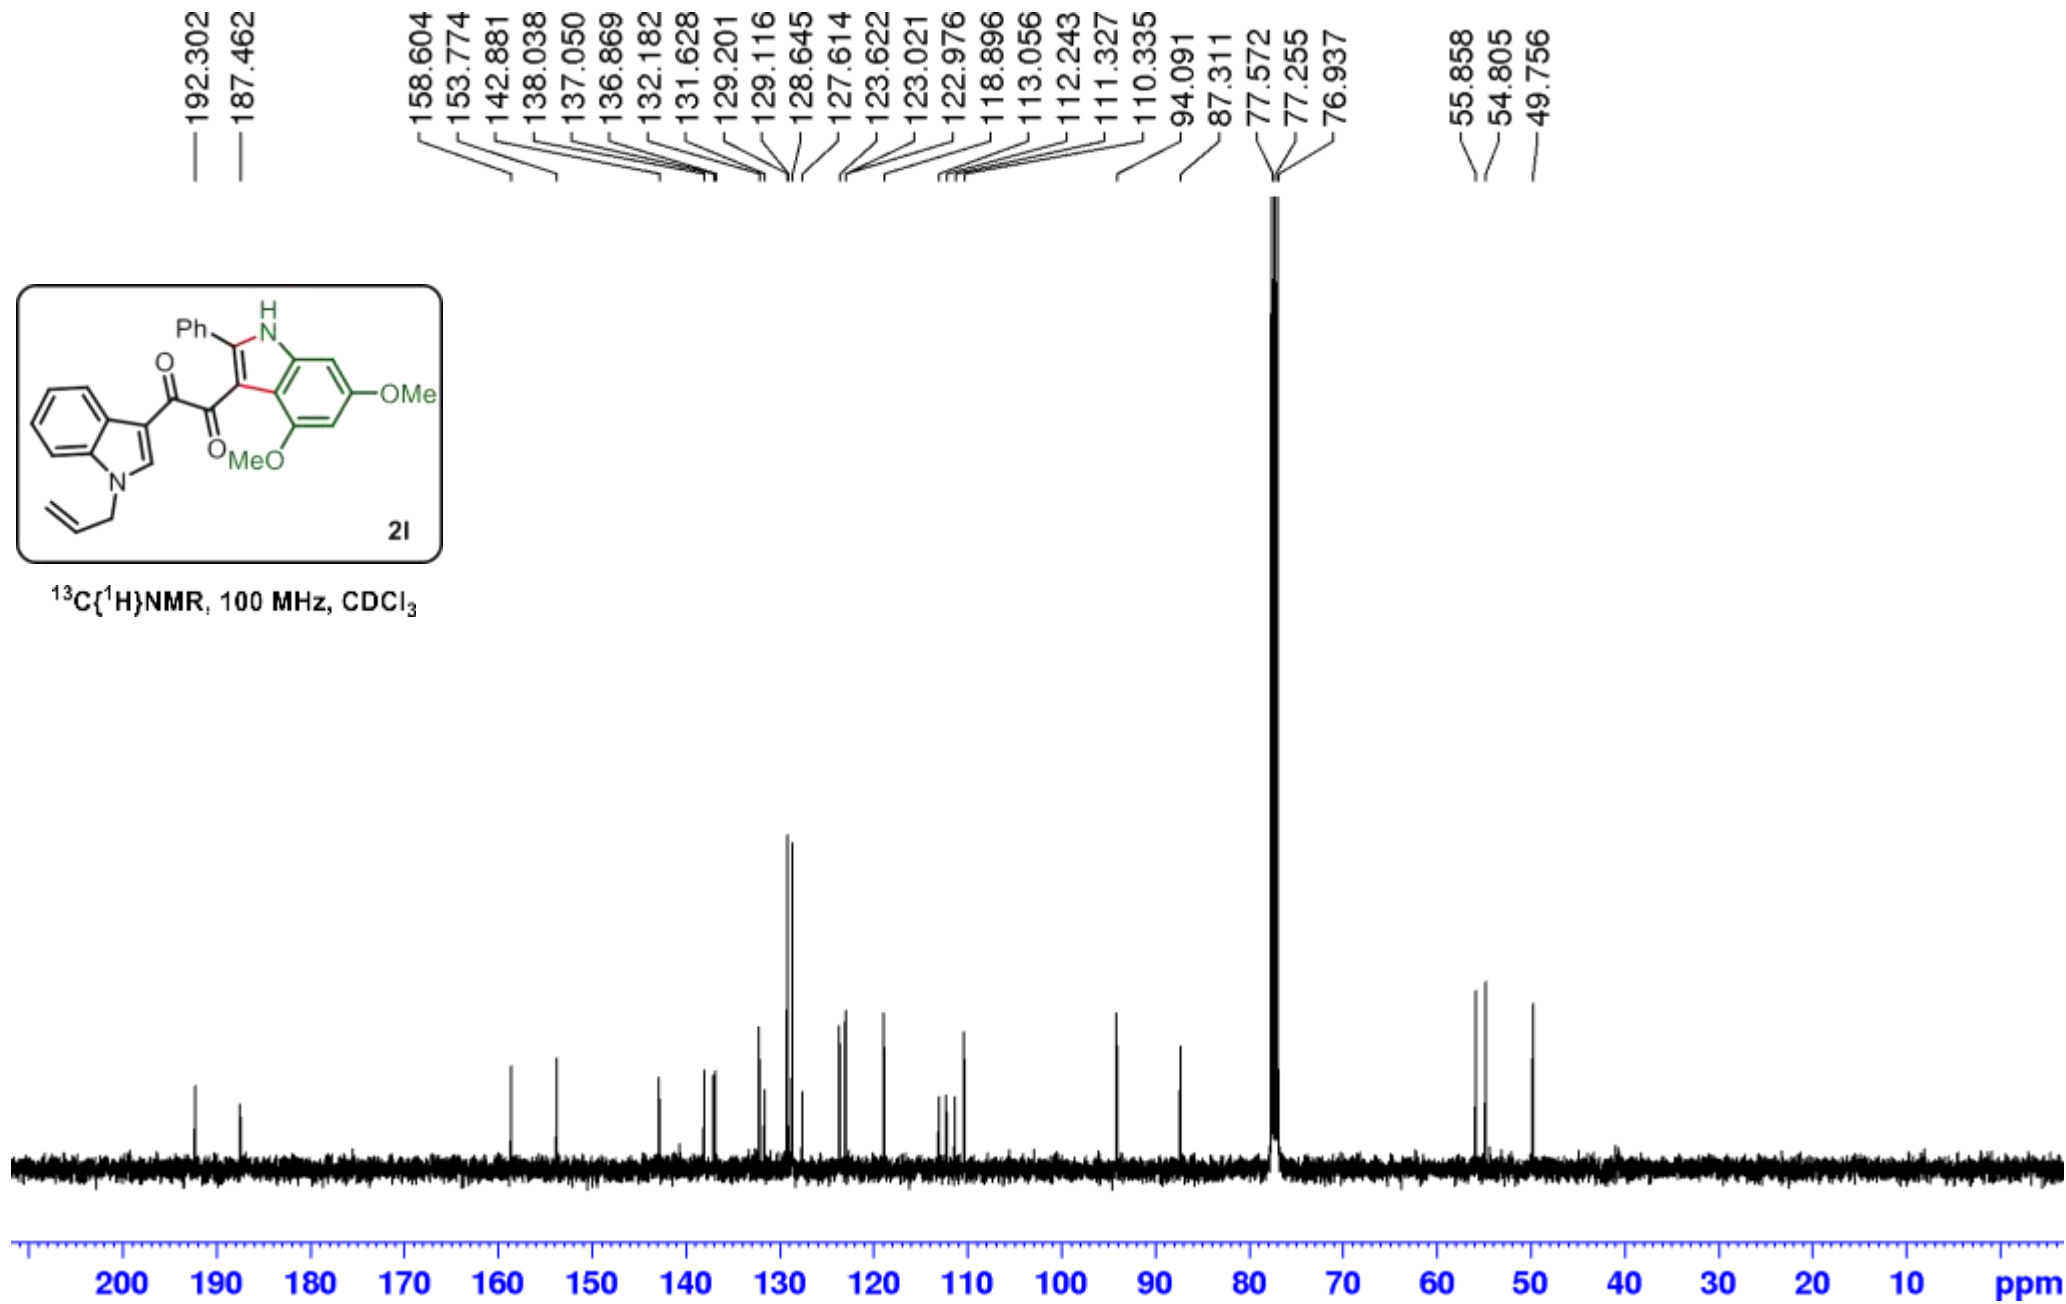



# Elemental Composition Report

## Single Mass Analysis

Tolerance = 10.0 PPM / DBE: min = -1.5, max = 50.0

Element prediction: Off

Number of isotope peaks used for i-FIT = 3

Monoisotopic Mass, Even Electron Ions

25 formula(e) evaluated with 1 results within limits (up to 3 closest results for each mass)

Elements Used:

C: 0-29 H: 0-100 N: 0-2 O: 0-4

NVD-65

QMI DIVISION, CSIR-IIIM JAMMU  
Xevo G2-XS QTOF YFC2015

04-Mar-2024

13:28:40

1: TOF MS ES+

1.52e+007

040324\_07 6 (0.138)

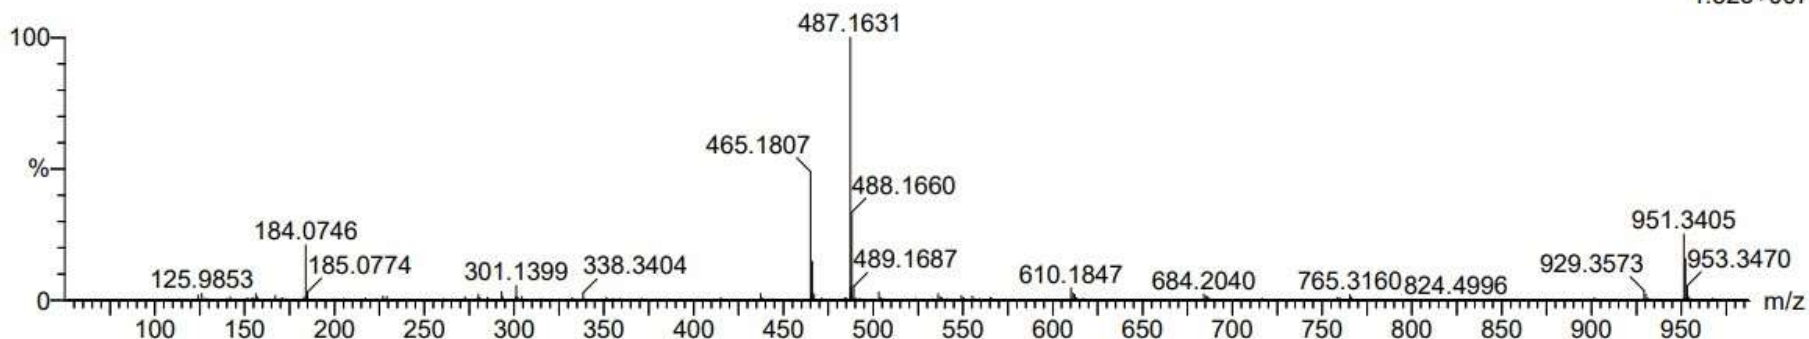

Minimum: -1.5  
Maximum: 2.0 10.0 50.0

| Mass     | Calc. Mass | mDa  | PPM  | DBE  | i-FIT | Norm | Conf (%) | Formula       |
|----------|------------|------|------|------|-------|------|----------|---------------|
| 465.1807 | 465.1814   | -0.7 | -1.5 | 18.5 | 941.4 | n/a  | n/a      | C29 H25 N2 O4 |

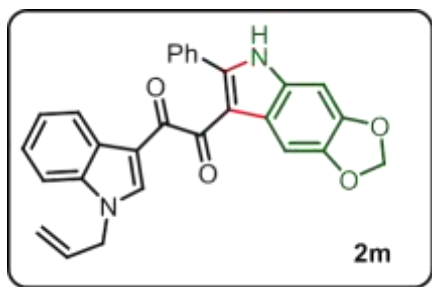

<sup>1</sup>H NMR, 400 MHz, DMSO-d<sub>6</sub>

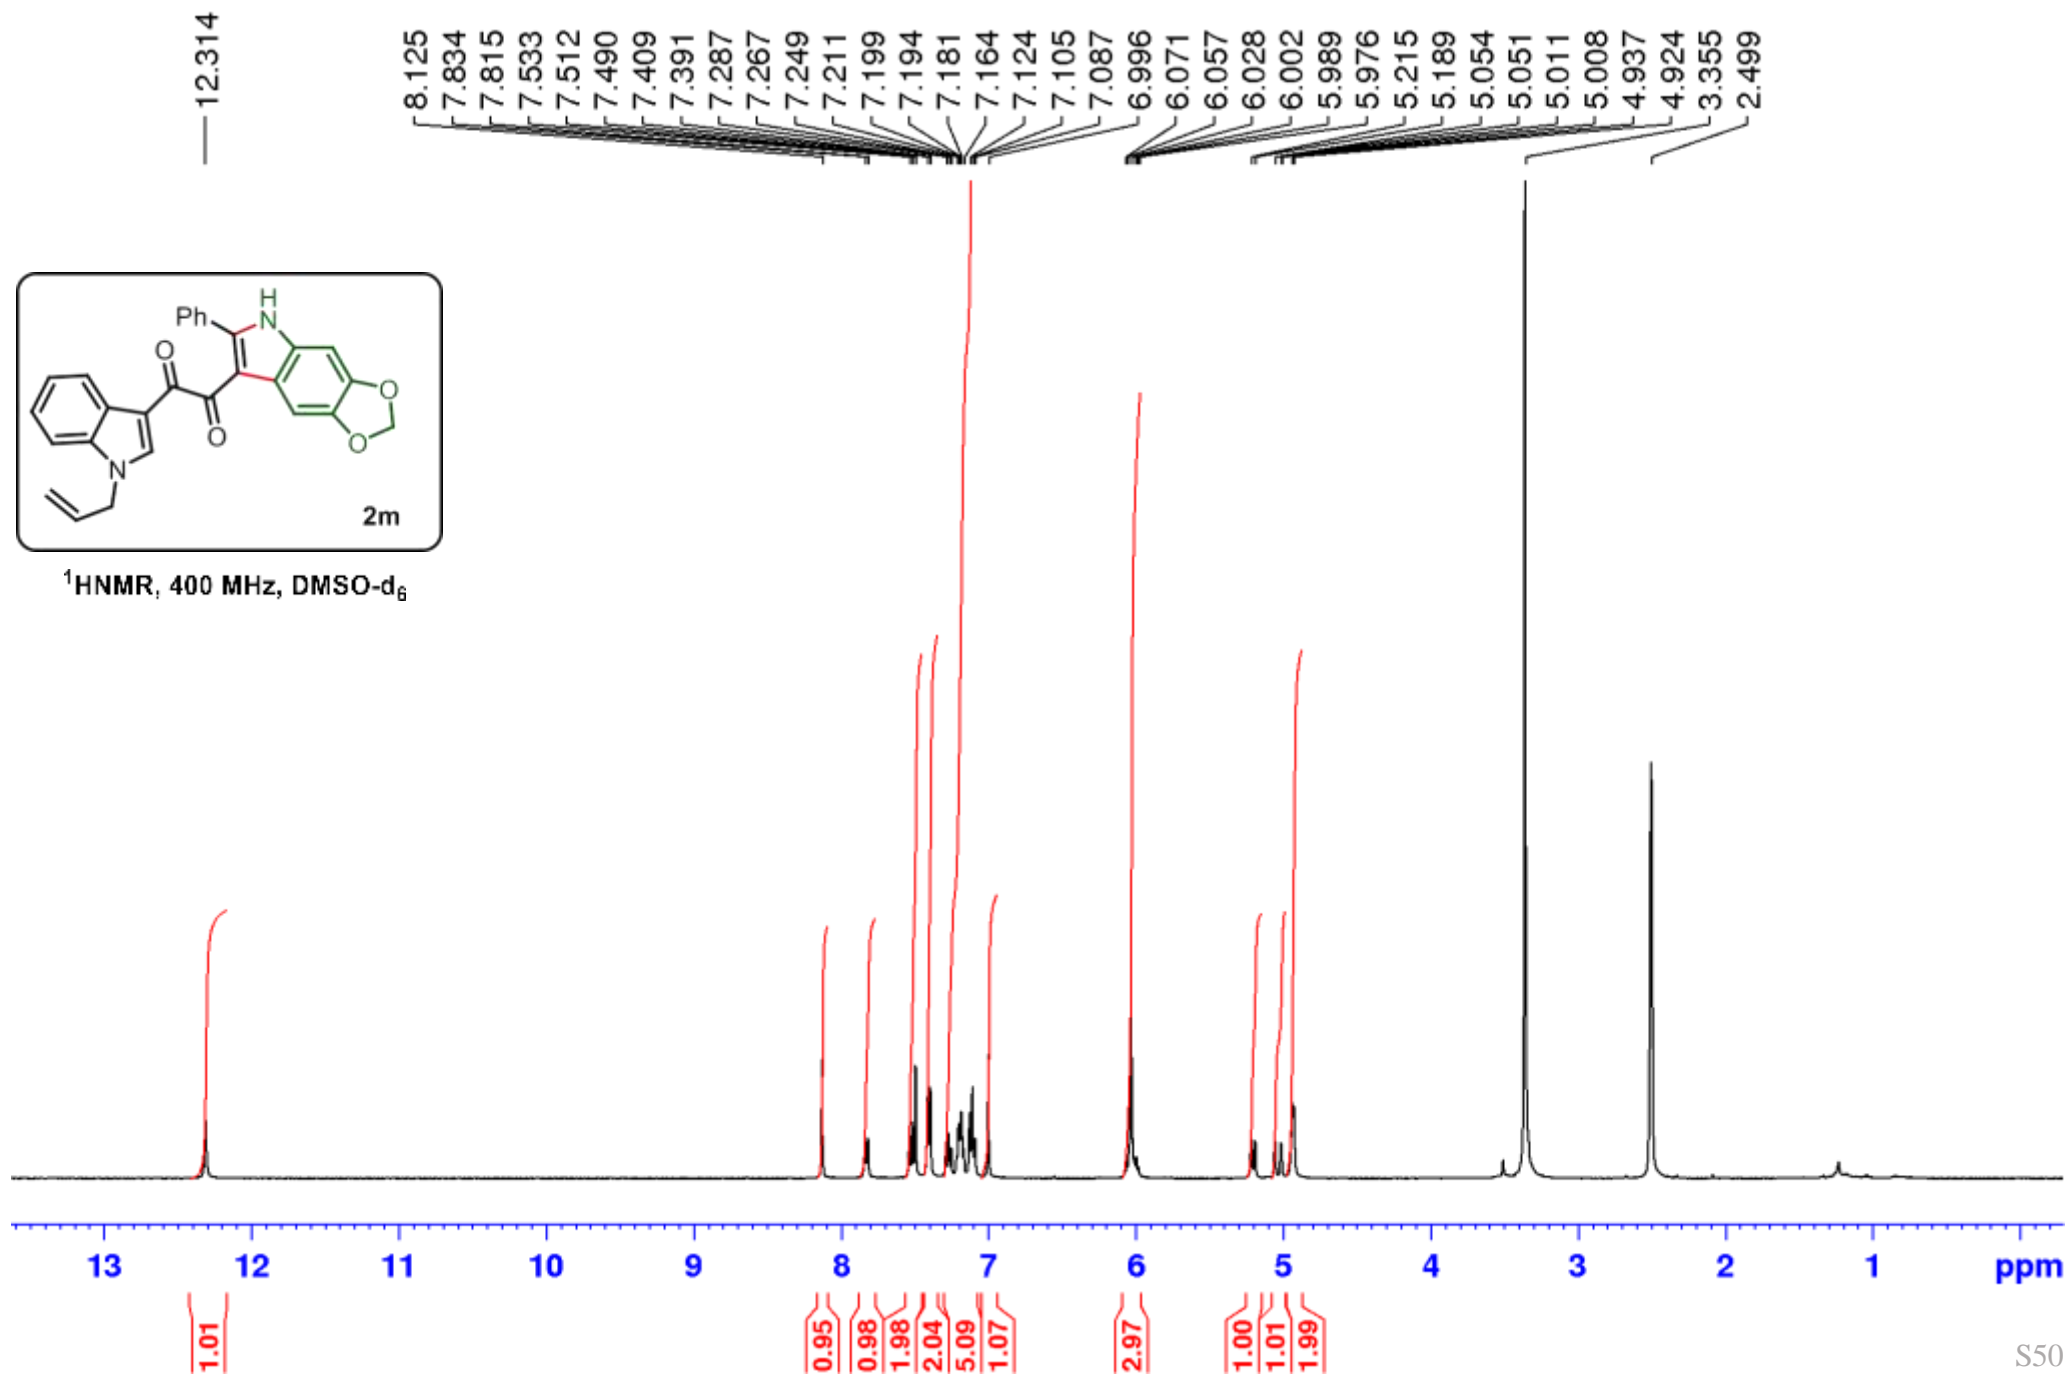

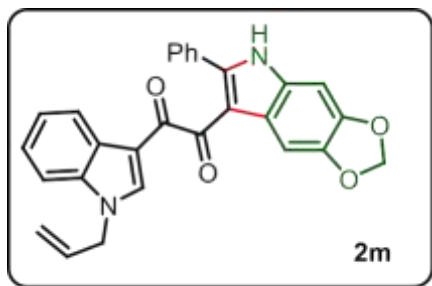

$^{13}\text{C}\{^1\text{H}\}$ NMR, 100 MHz,  $\text{DMSO-d}_6$

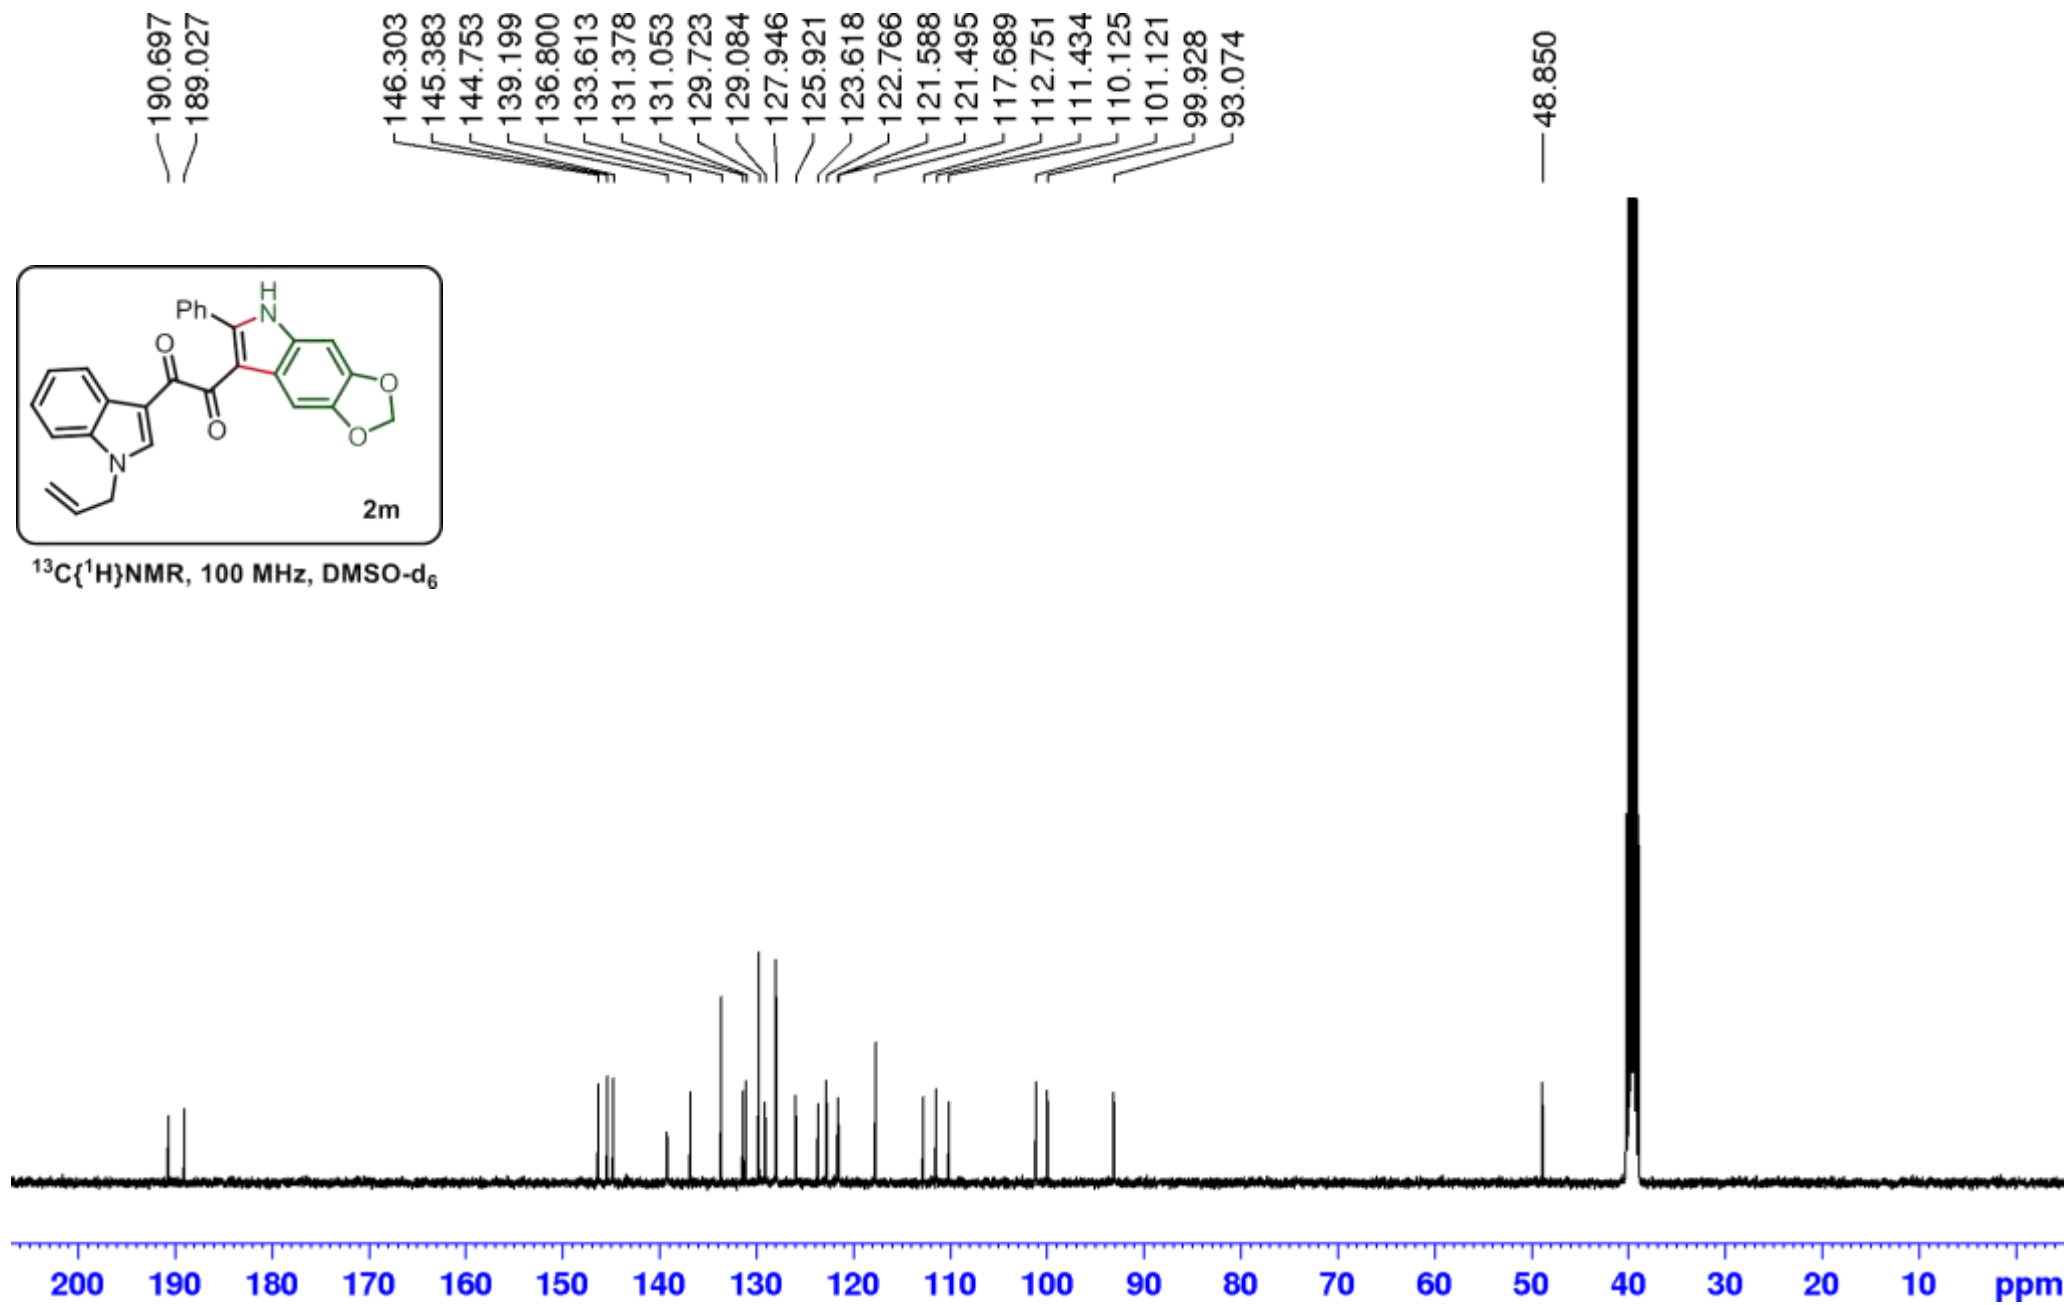

# Elemental Composition Report

## Single Mass Analysis

Tolerance = 100.0 PPM / DBE: min = -1.5, max = 50.0

Element prediction: Off

Number of isotope peaks used for i-FIT = 3

Monoisotopic Mass, Even Electron Ions

25 formula(e) evaluated with 1 results within limits (up to 3 closest results for each mass)

Elements Used:

C: 0-28 H: 0-100 N: 0-2 O: 0-4

NVD-88

QMI DIVISION, CSIR-IIIM JAMMU  
Xevo G2-XS QTOF YFC2015

06-Oct-2023

14:04:17

1: TOF MS ES+

4.92e+006

061023\_15 6 (0.138)

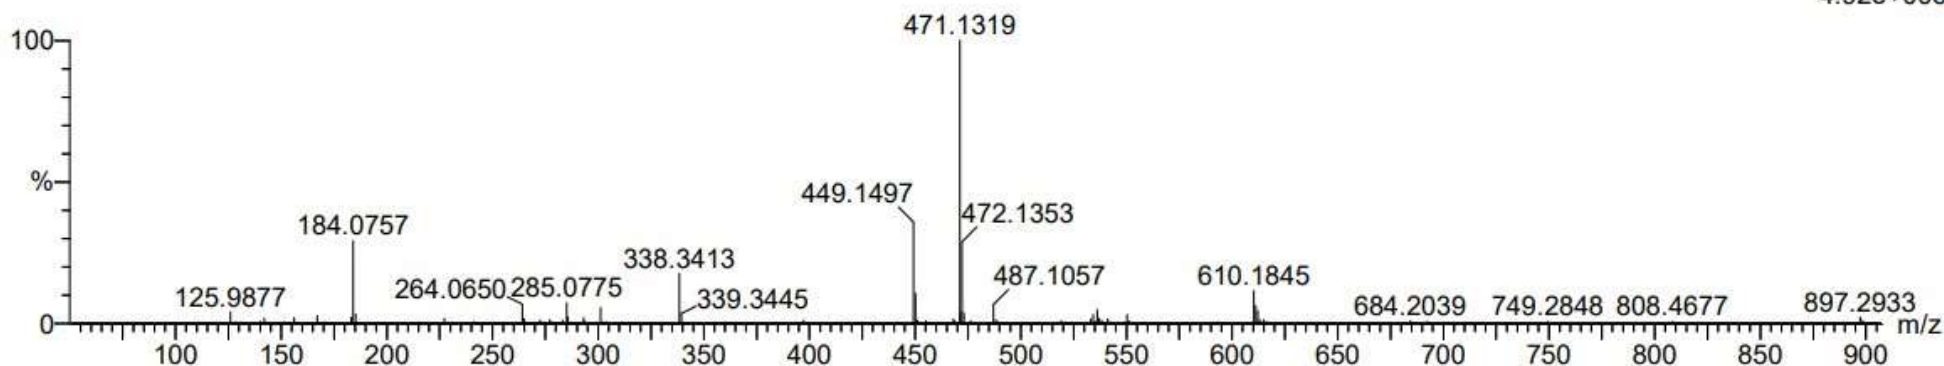

Minimum: -1.5  
Maximum: 2.0 100.0 50.0

| Mass     | Calc. Mass | mDa  | PPM  | DBE  | i-FIT | Norm | Conf (%) | Formula       |
|----------|------------|------|------|------|-------|------|----------|---------------|
| 449.1497 | 449.1501   | -0.4 | -0.9 | 19.5 | 785.8 | n/a  | n/a      | C28 H21 N2 O4 |

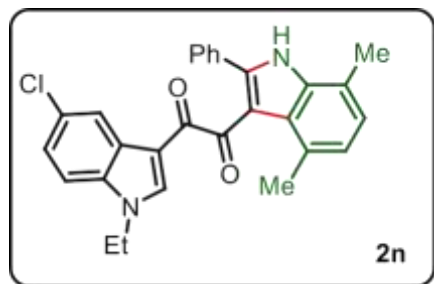

<sup>1</sup>HNMR, 400 MHz, DMSO-d<sub>6</sub>

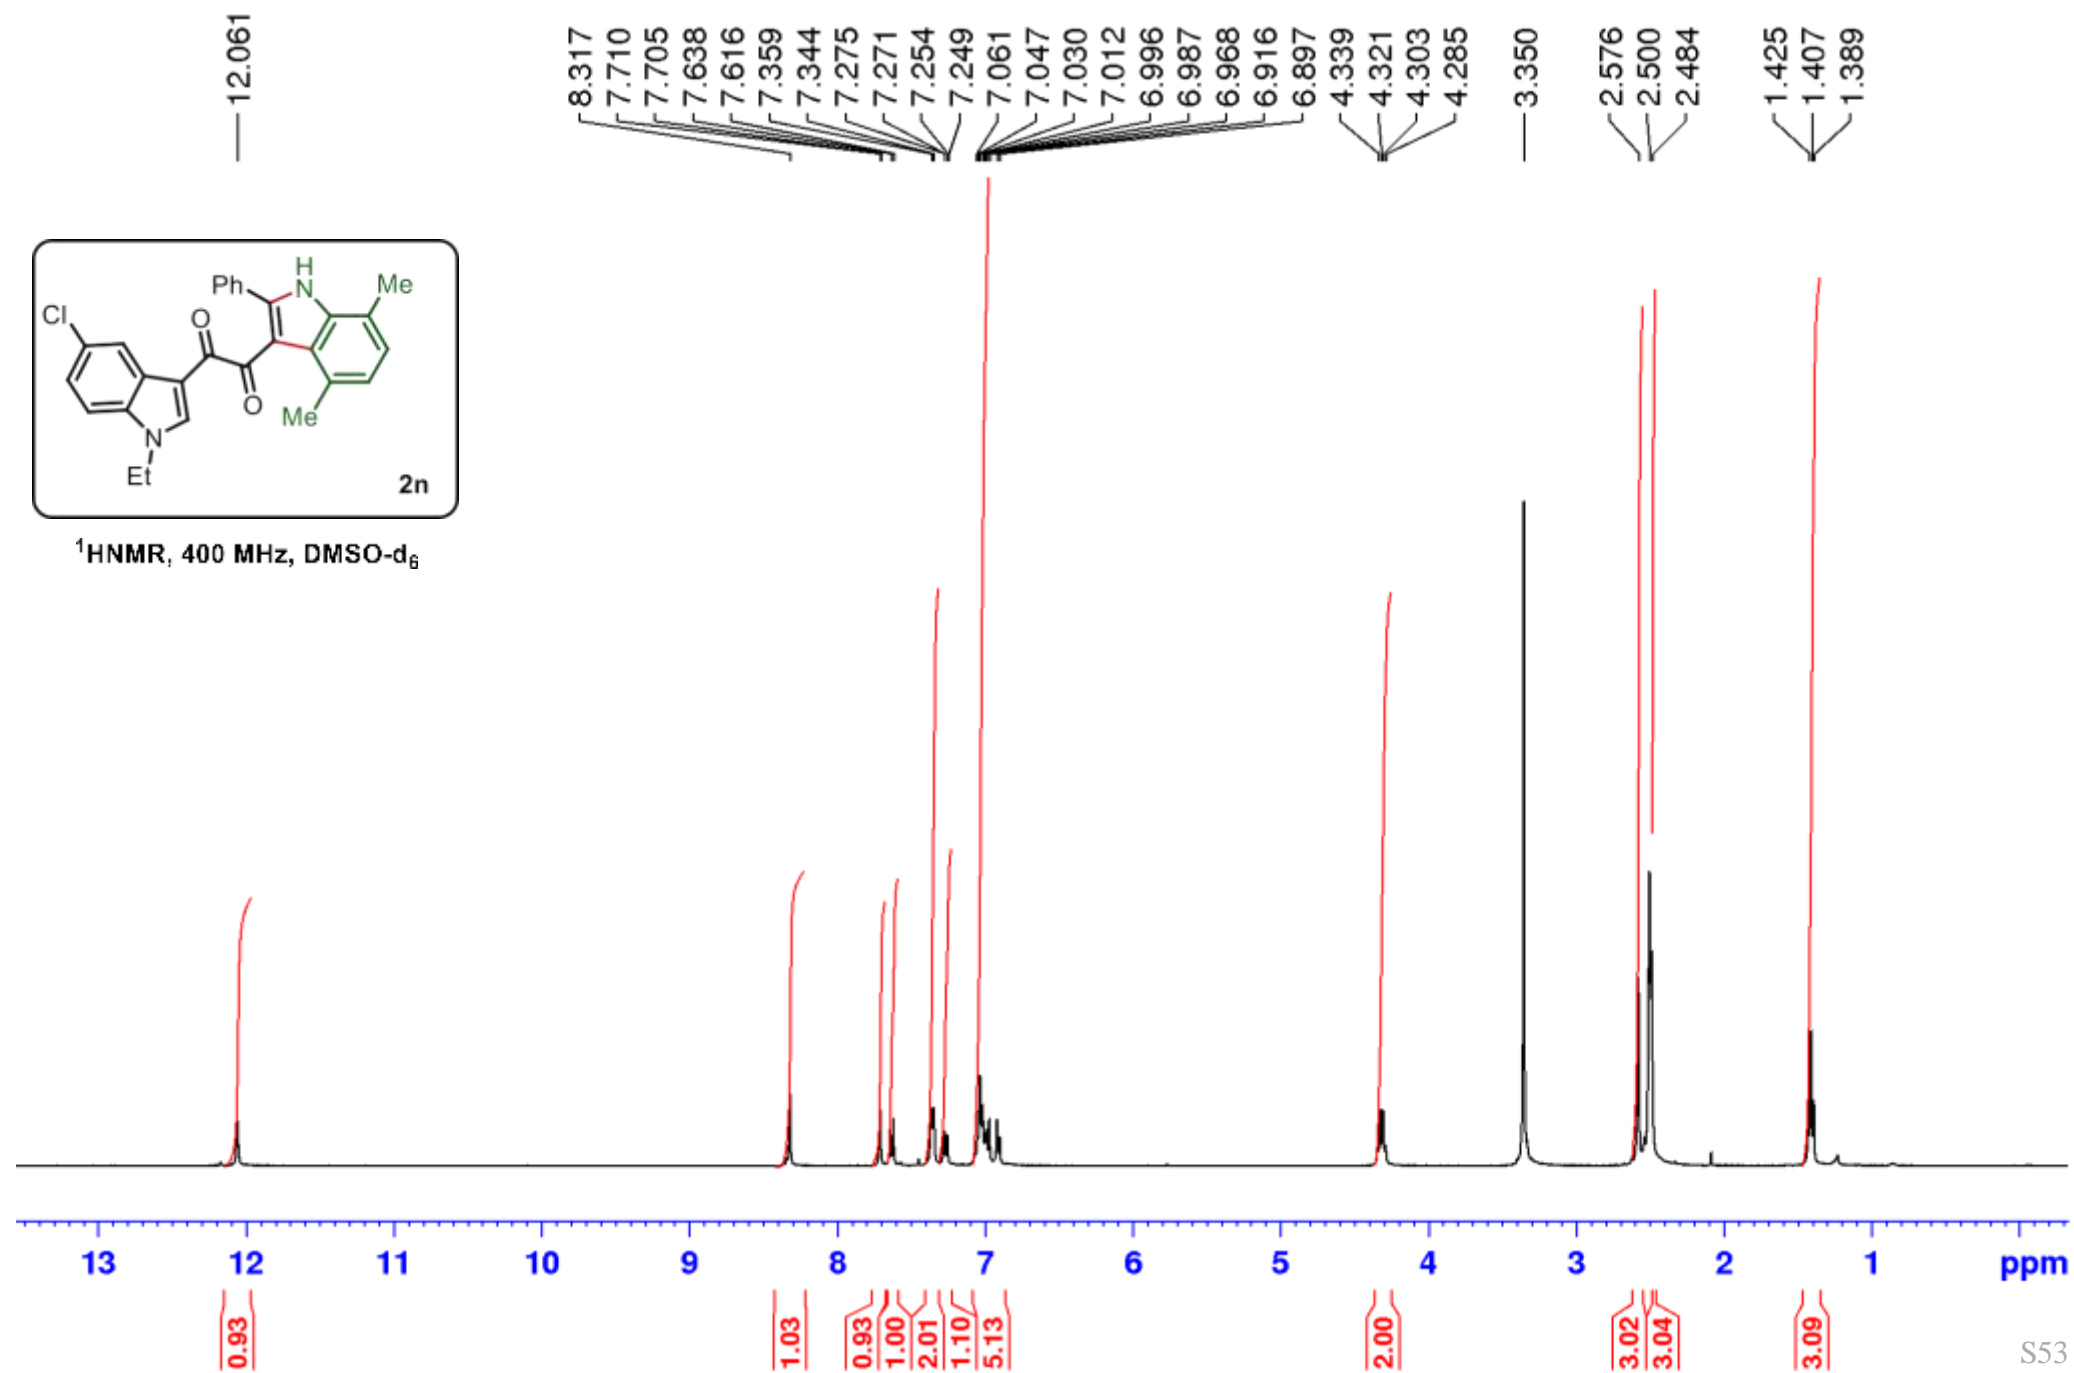

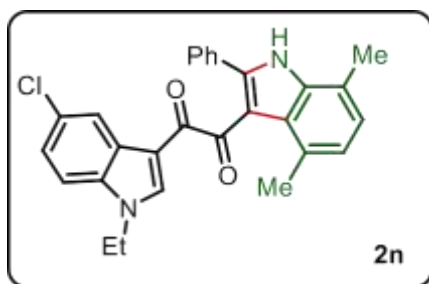

$^{13}\text{C}\{^1\text{H}\}\text{NMR}$ , 100 MHz,  $\text{CDCl}_3$

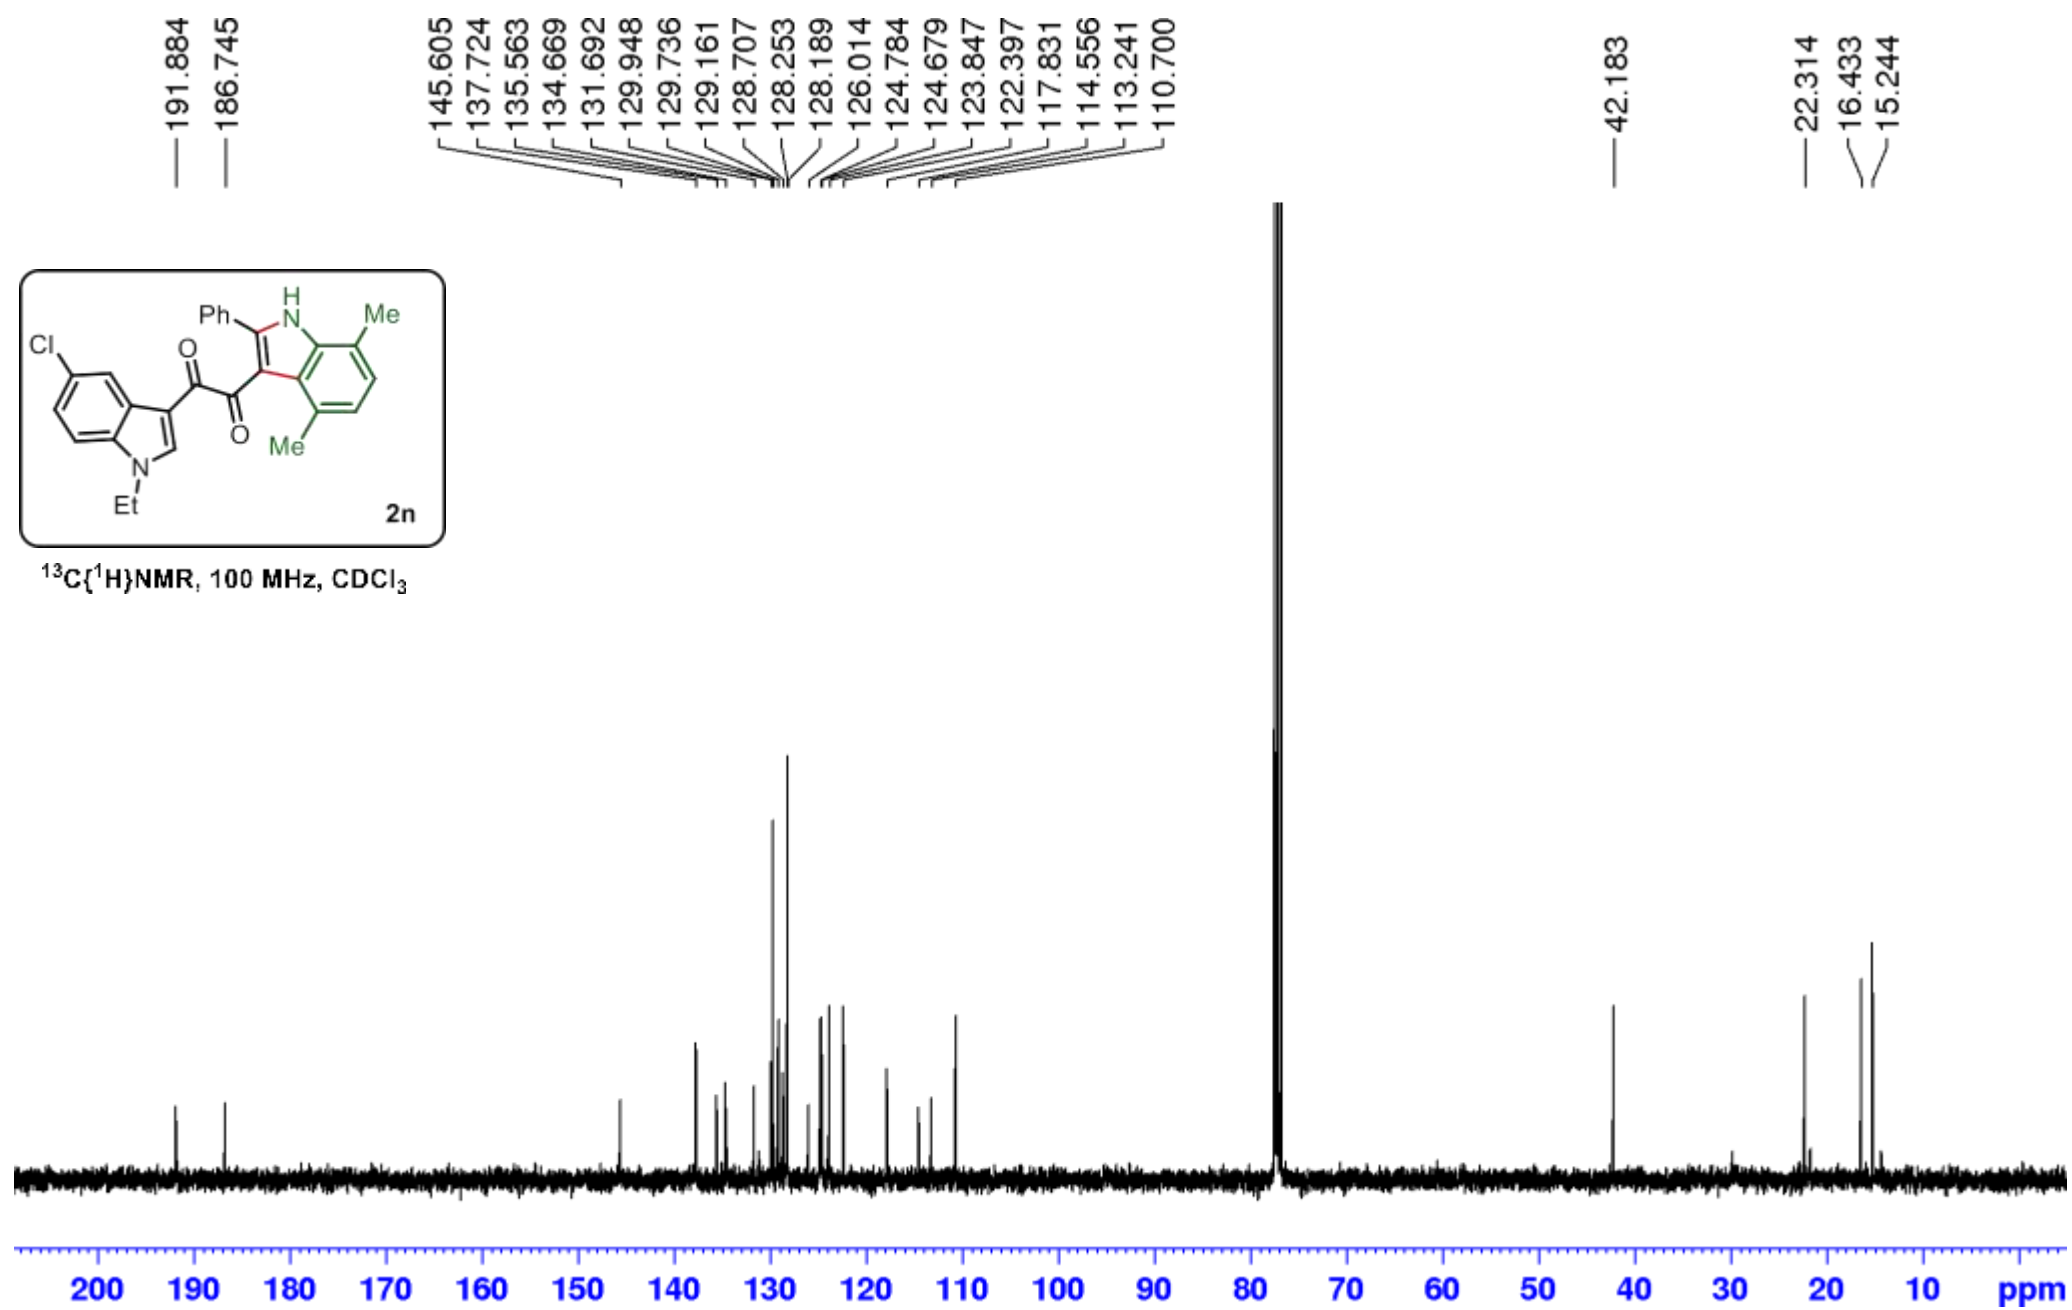

# Elemental Composition Report

## Single Mass Analysis

Tolerance = 100.0 PPM / DBE: min = -1.5, max = 50.0

Element prediction: Off

Number of isotope peaks used for i-FIT = 3

Monoisotopic Mass, Even Electron Ions

27 formula(e) evaluated with 1 results within limits (up to 3 closest results for each mass)

Elements Used:

C: 0-28 H: 0-100 N: 0-2 O: 0-2 Cl: 0-1

NVD-96

QMI DIVISION, CSIR-IIIM JAMMU  
Xevo G2-XS QTOF YFC2015

11-Oct-2023  
13:17:40  
1: TOF MS ES+  
1.19e+006

111023\_02 5 (0.121)

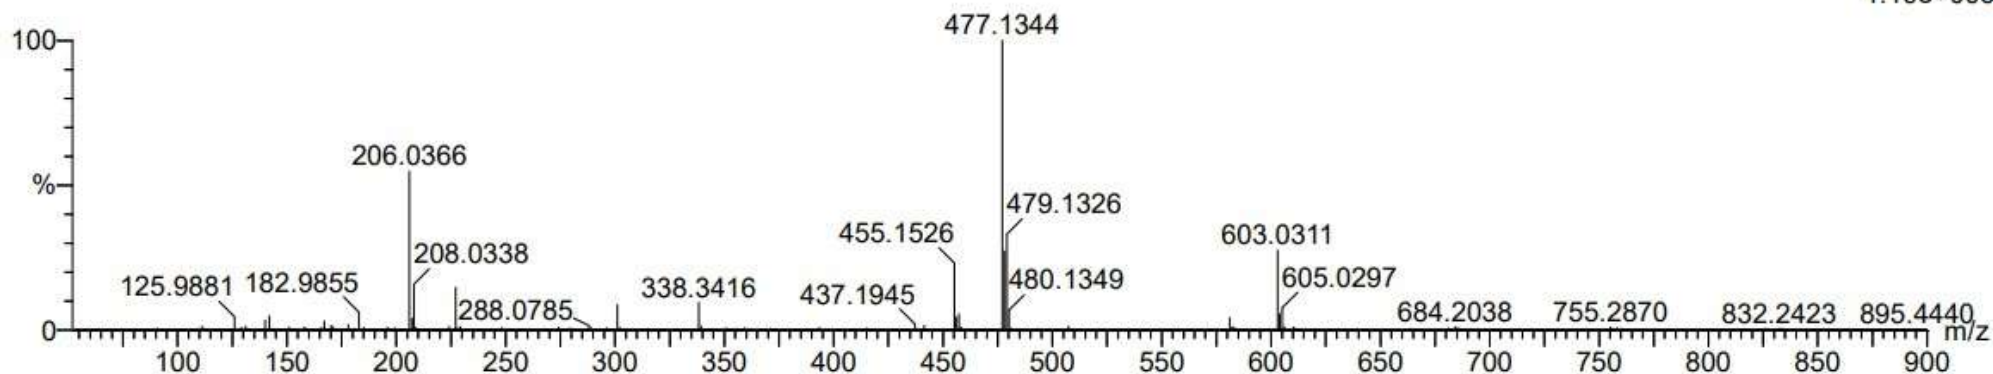

Minimum: -1.5  
Maximum: 2.0 100.0 50.0

| Mass     | Calc. Mass | mDa | PPM | DBE  | i-FIT | Norm | Conf (%) | Formula          |
|----------|------------|-----|-----|------|-------|------|----------|------------------|
| 455.1526 | 455.1526   | 0.0 | 0.0 | 17.5 | 636.7 | n/a  | n/a      | C28 H24 N2 O2 Cl |

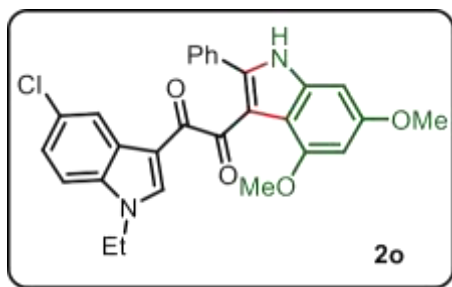

<sup>1</sup>HNMR, 400 MHz, DMSO-d<sub>6</sub>

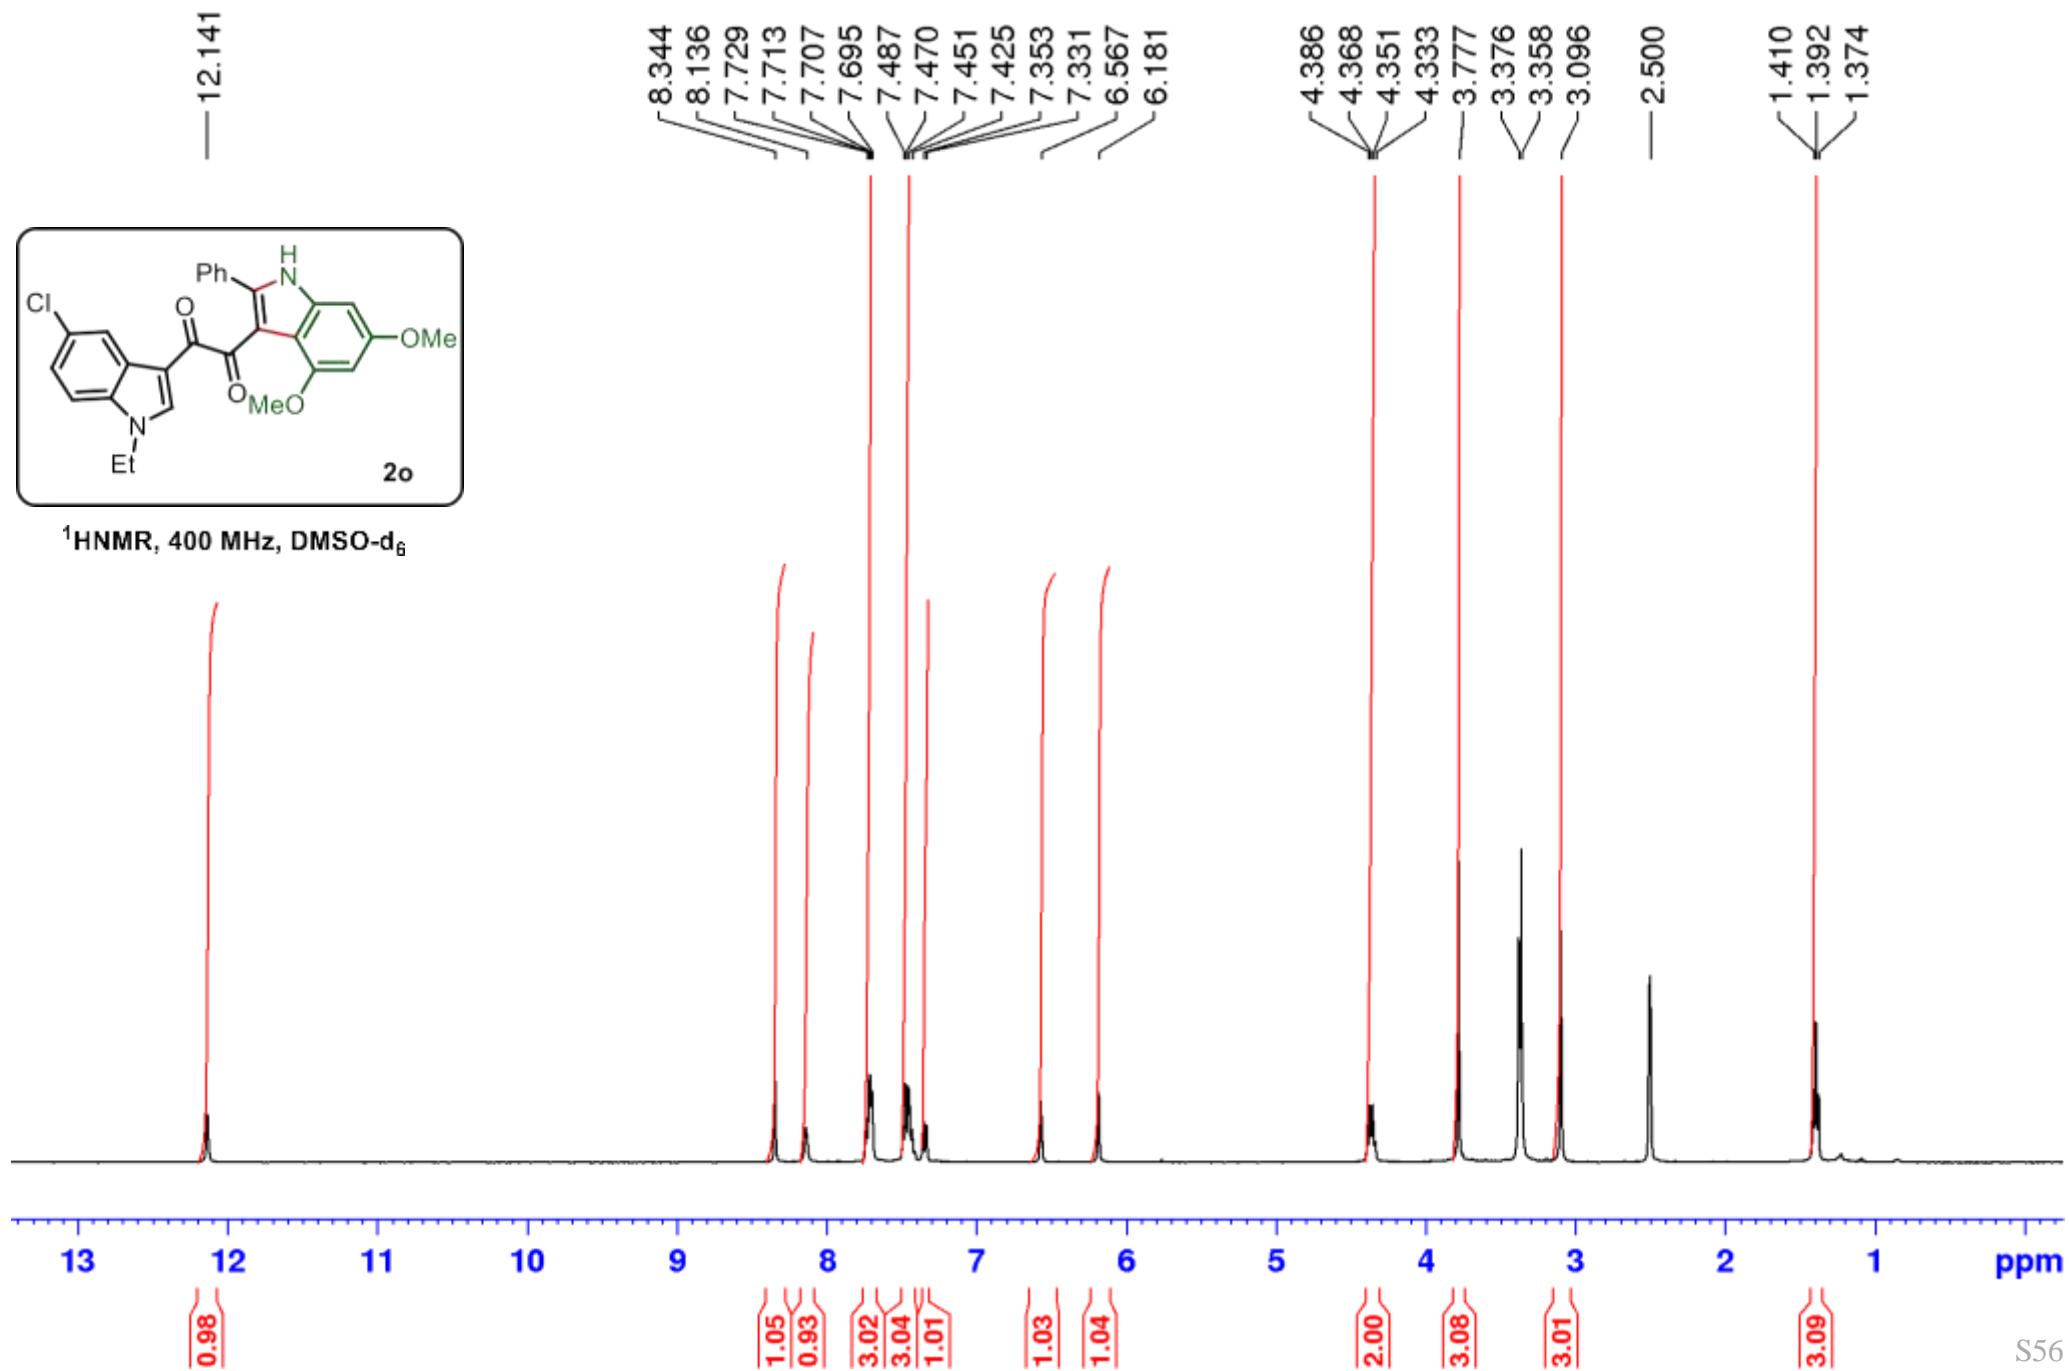



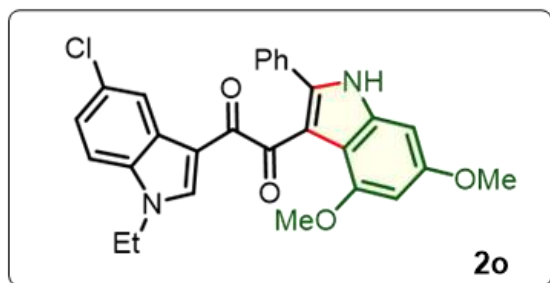

$^{13}\text{C}\{^1\text{H}\}$ NMR, 100MHz, DMSO- $\text{d}_6$

— 191.216  
— 186.857

— 157.684  
— 152.960  
— 142.420  
— 138.970  
— 137.073  
— 134.626  
— 131.450  
— 129.259  
— 128.762  
— 128.181  
— 127.772  
— 127.060  
— 123.022  
— 120.434  
— 112.738  
— 111.385  
— 111.267  
— 109.886  
— 93.305  
— 87.437

— 55.419  
— 54.311

— 41.474

— 15.293

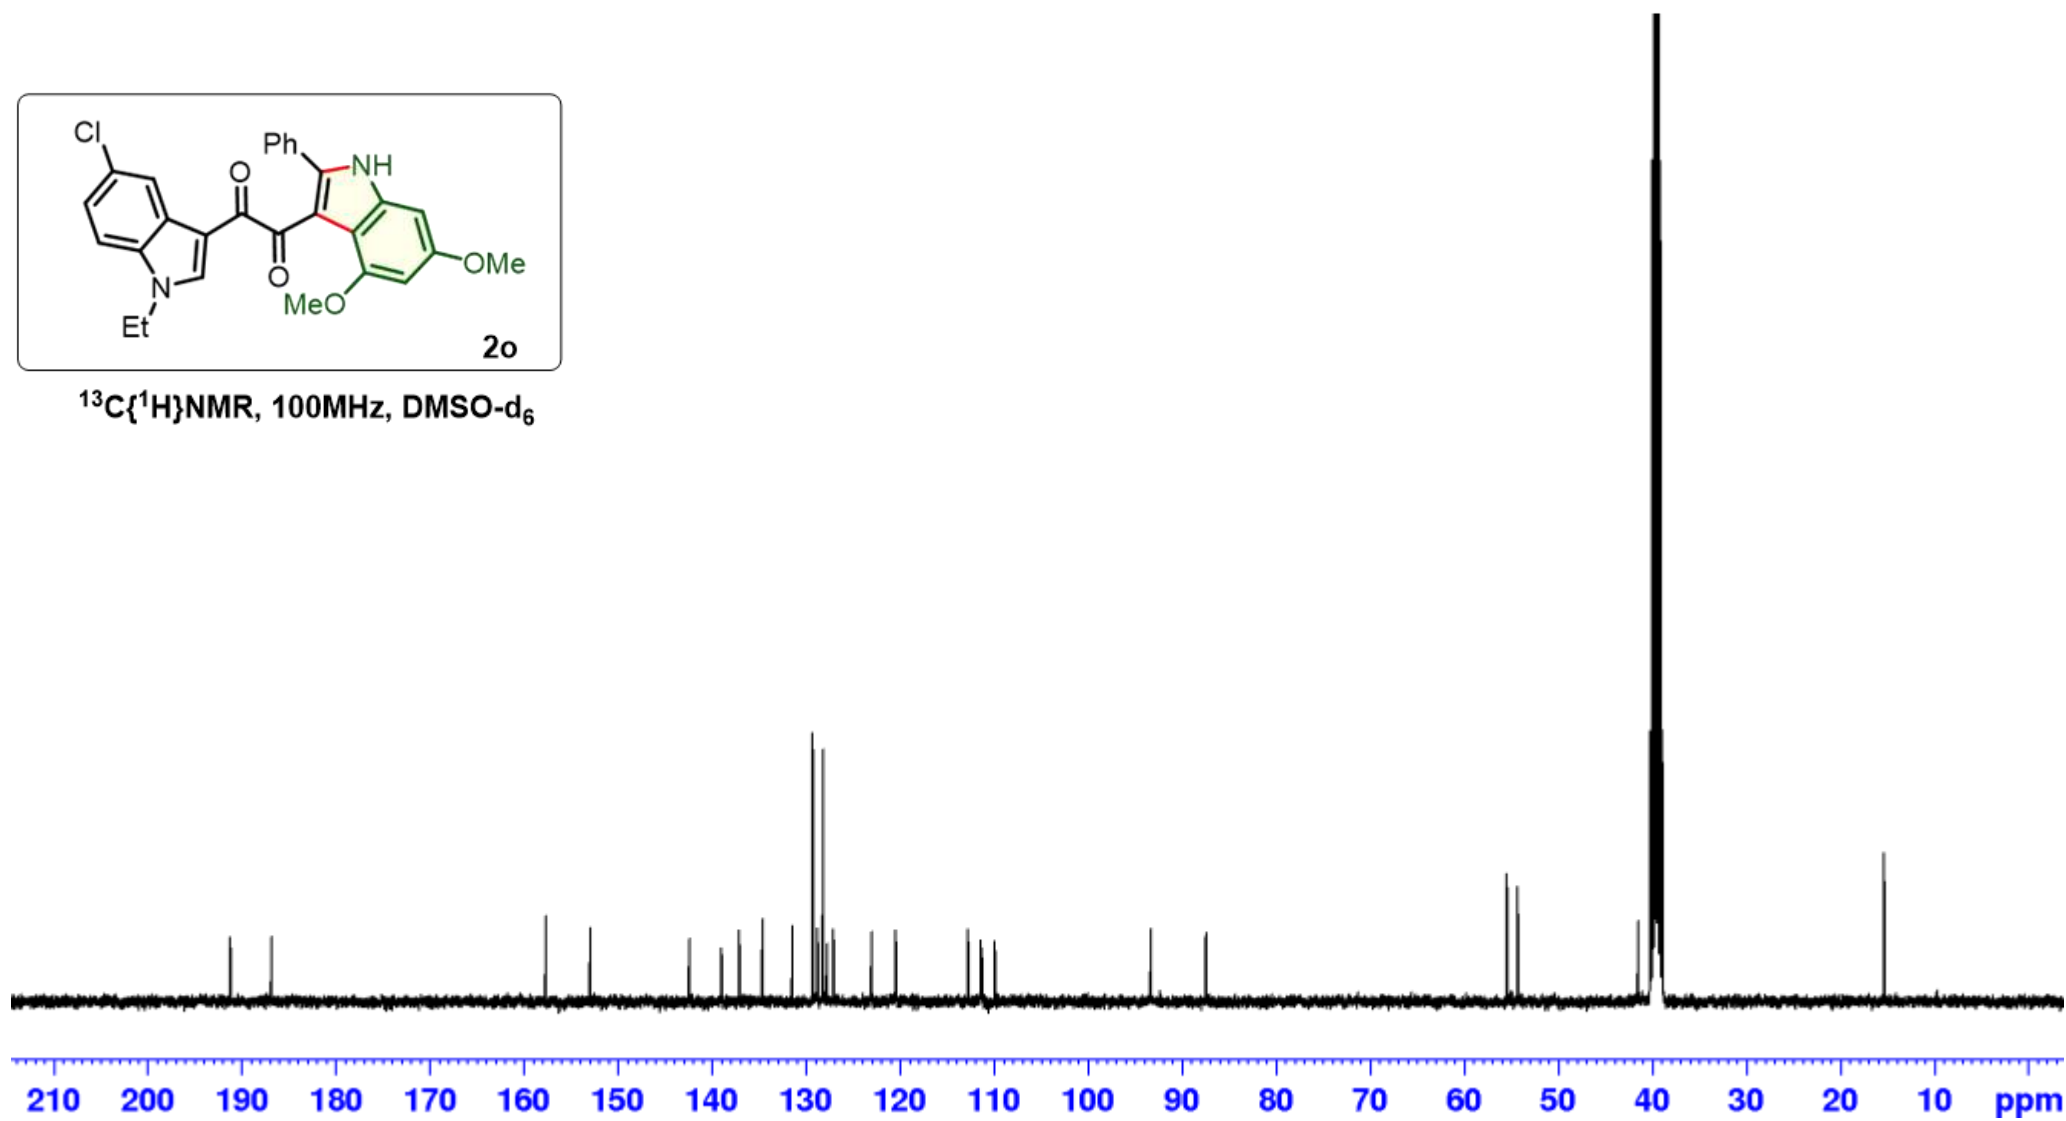

# Elemental Composition Report

## Single Mass Analysis

Tolerance = 10.0 PPM / DBE: min = -1.5, max = 50.0

Element prediction: Off

Number of isotope peaks used for i-FIT = 3

Monoisotopic Mass, Even Electron Ions

39 formula(e) evaluated with 1 results within limits (up to 3 closest results for each mass)

Elements Used:

C: 0-28 H: 0-100 N: 0-2 O: 0-4 Cl: 0-1

NVD-68

QMI DIVISION, CSIR-IIIM JAMMU  
Xevo G2-XS QTOF YFC2015

04-Mar-2024

13:26:06

1: TOF MS ES+

6.92e+006

040324\_06 6 (0.138)

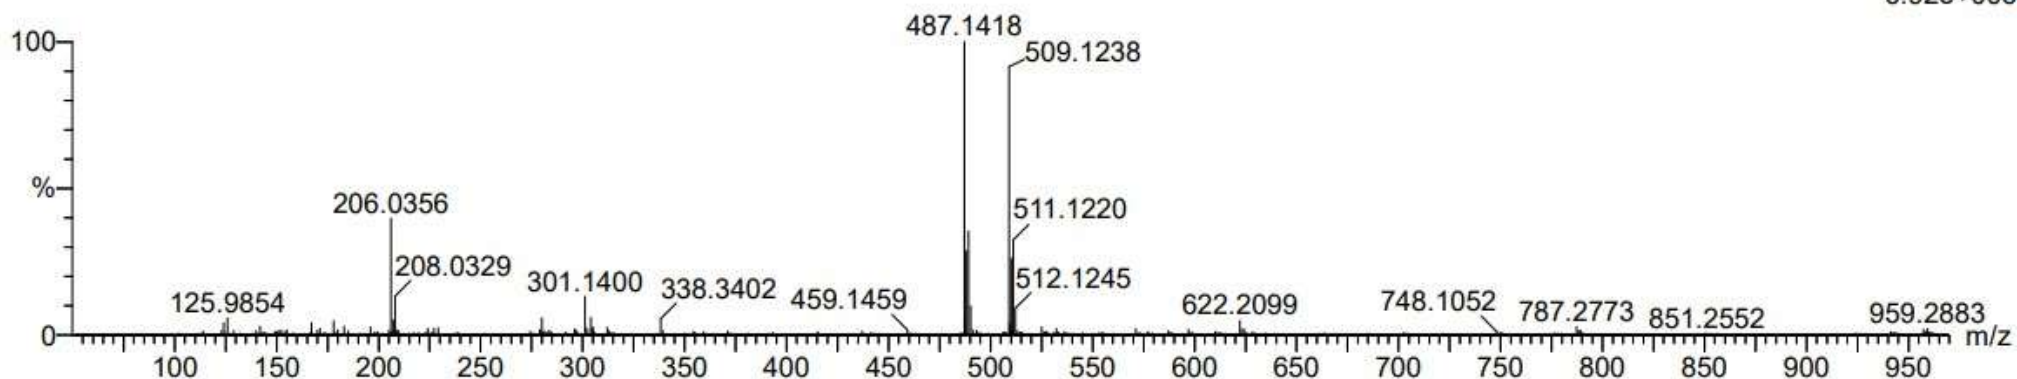

Minimum: -1.5  
Maximum: 2.0 10.0 50.0

| Mass     | Calc. Mass | mDa  | PPM  | DBE  | i-FIT | Norm | Conf(%) | Formula          |
|----------|------------|------|------|------|-------|------|---------|------------------|
| 487.1418 | 487.1425   | -0.7 | -1.4 | 17.5 | 967.4 | n/a  | n/a     | C28 H24 N2 O4 Cl |

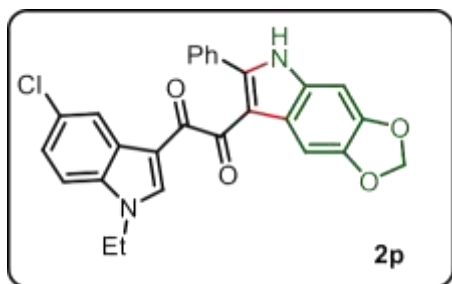

<sup>1</sup>H NMR, 400 MHz, DMSO-d<sub>6</sub>

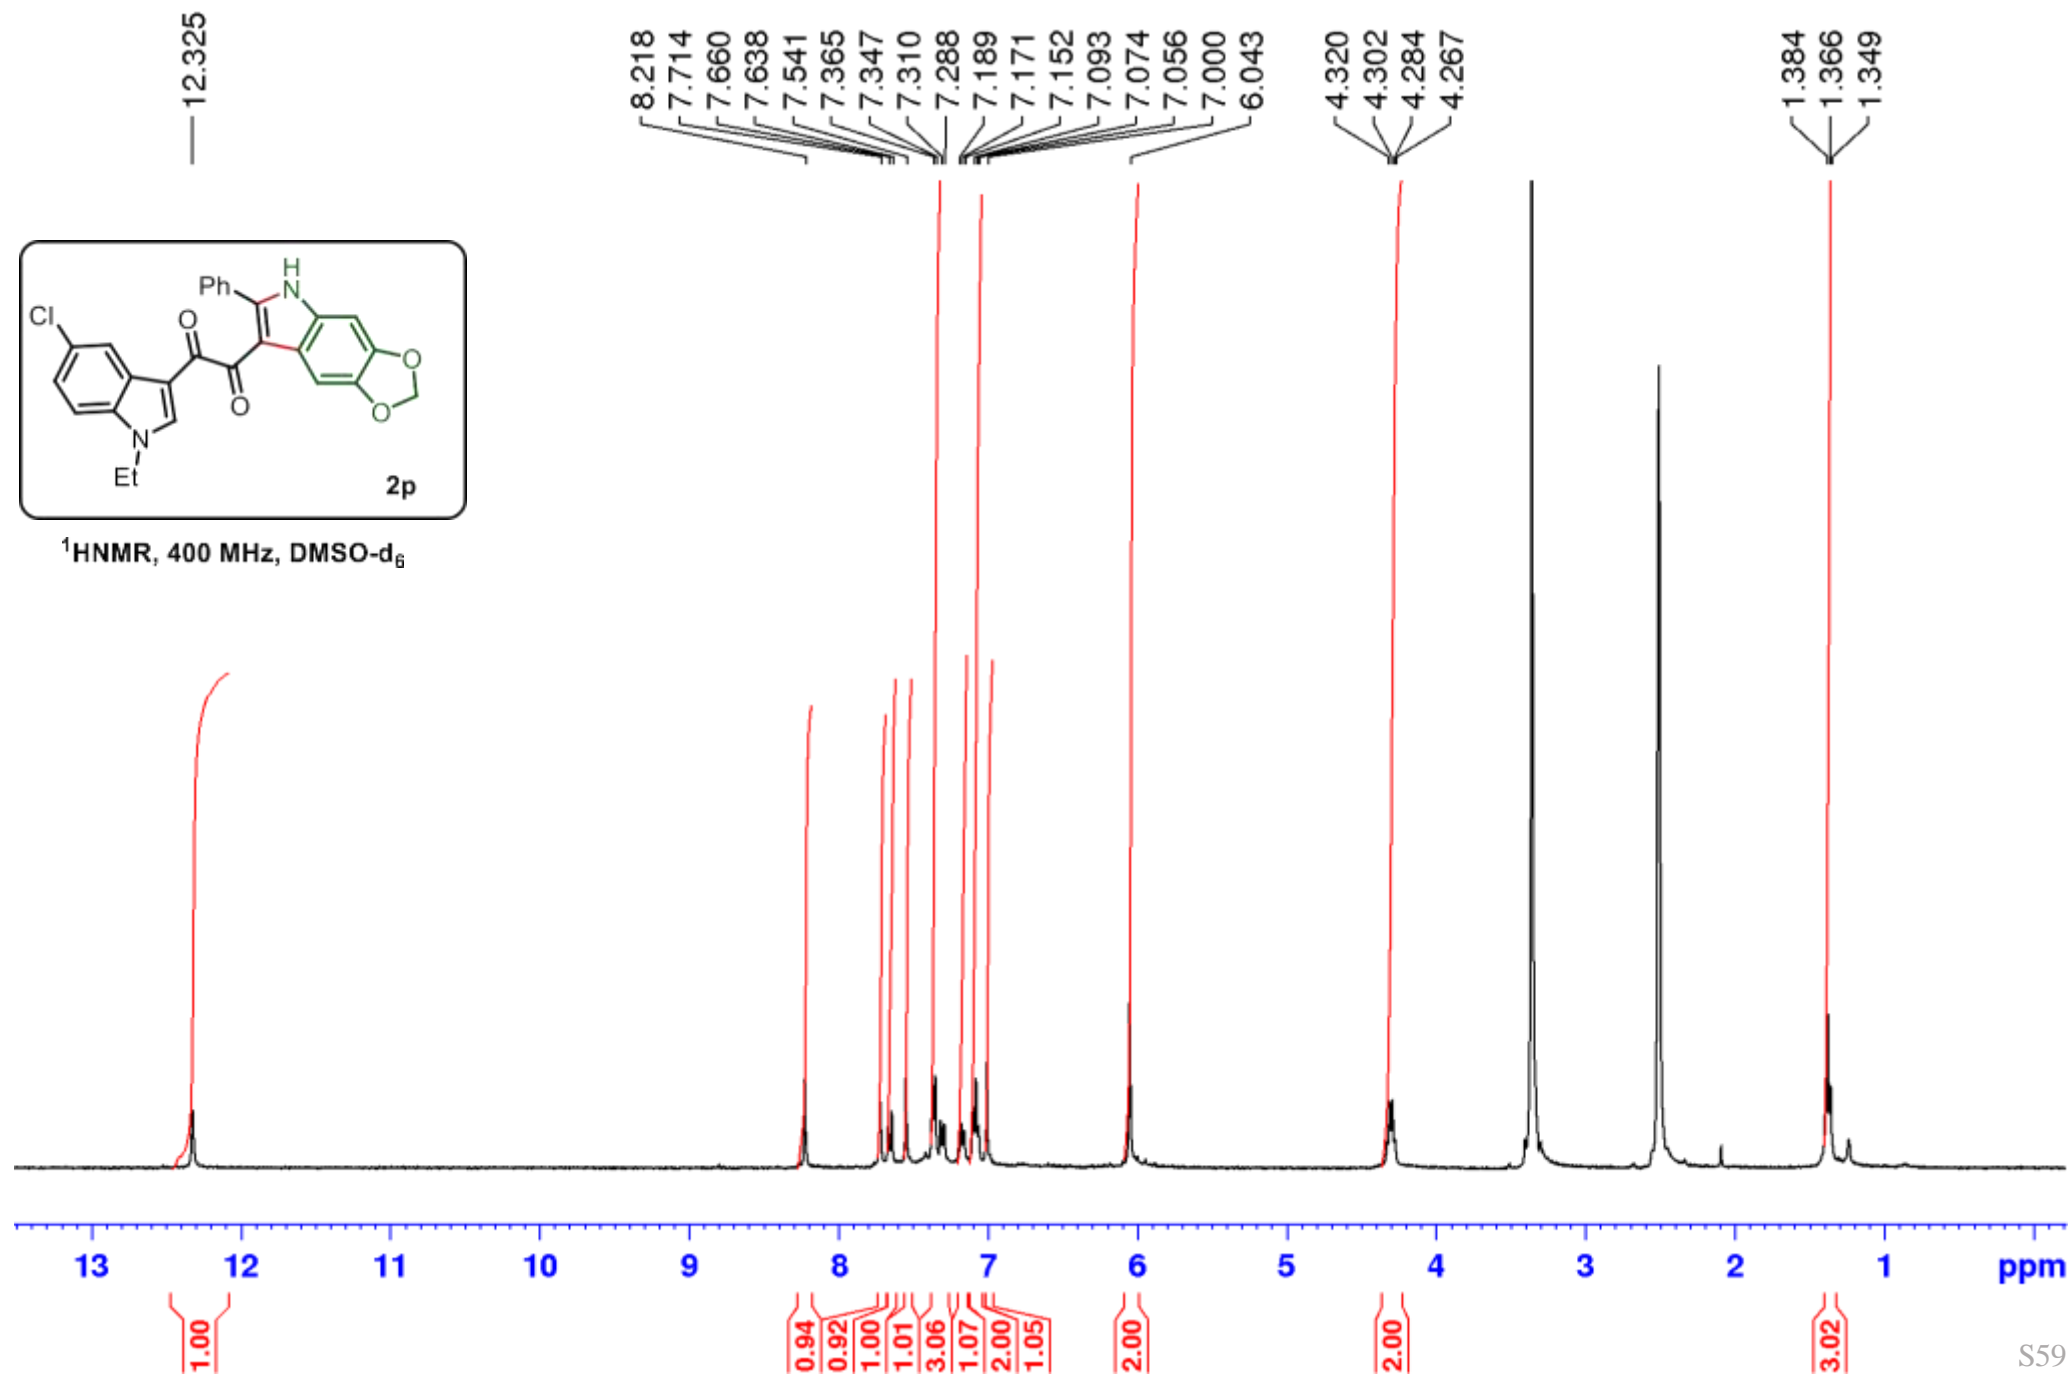

190.305  
188.476

146.356  
145.272  
144.637  
139.500  
134.815  
131.262  
130.873  
129.637  
128.753  
127.688  
127.161  
126.987  
123.242  
121.423  
120.437  
112.643  
112.074  
110.125  
100.972  
99.836  
92.894

41.584

15.278

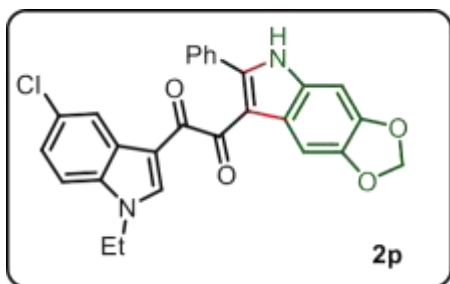

$^{13}\text{C}\{^1\text{H}\}$ NMR, 100 MHz,  $\text{DMSO-d}_6$

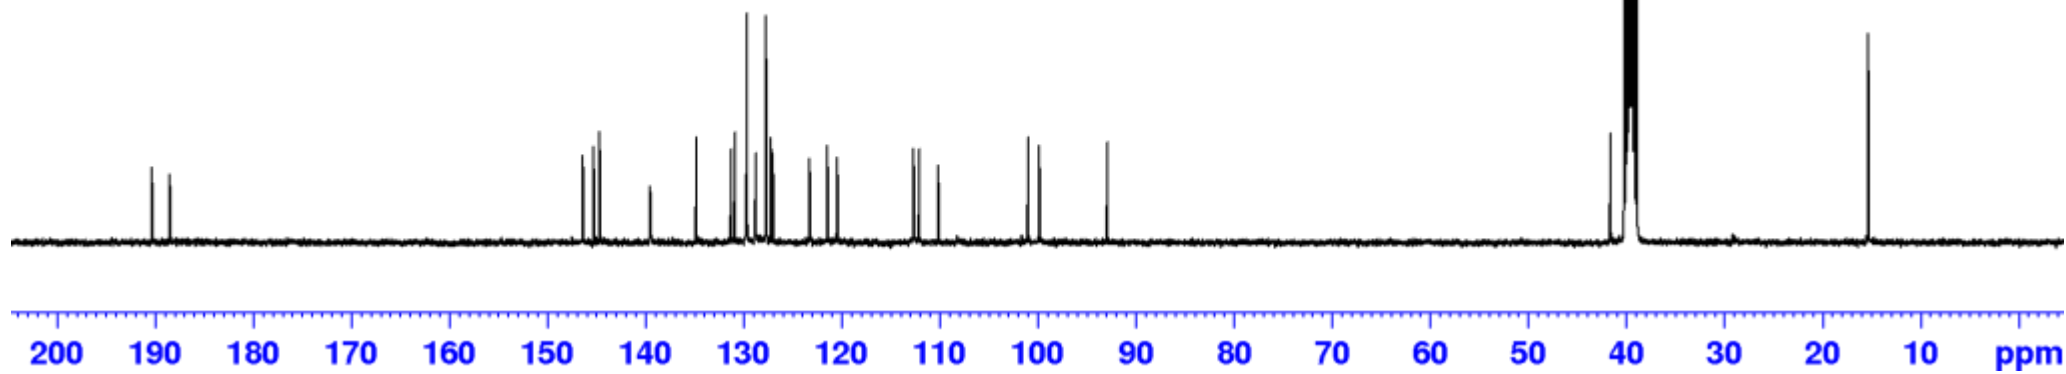

# Elemental Composition Report

## Single Mass Analysis

Tolerance = 50.0 PPM / DBE: min = -1.5, max = 50.0

Element prediction: Off

Number of isotope peaks used for i-FIT = 3

Monoisotopic Mass, Even Electron Ions

49 formula(e) evaluated with 1 results within limits (up to 3 closest results for each mass)

Elements Used:

C: 0-28 H: 0-100 N: 0-2 O: 0-4 Cl: 0-1

NVD-95

QMI DIVISION, CSIR-IIIM JAMMU  
Xevo G2-XS QTOF YFC2015

11-Oct-2023

13:20:22

1: TOF MS ES+

7.66e+005

111023\_03 6 (0.138)

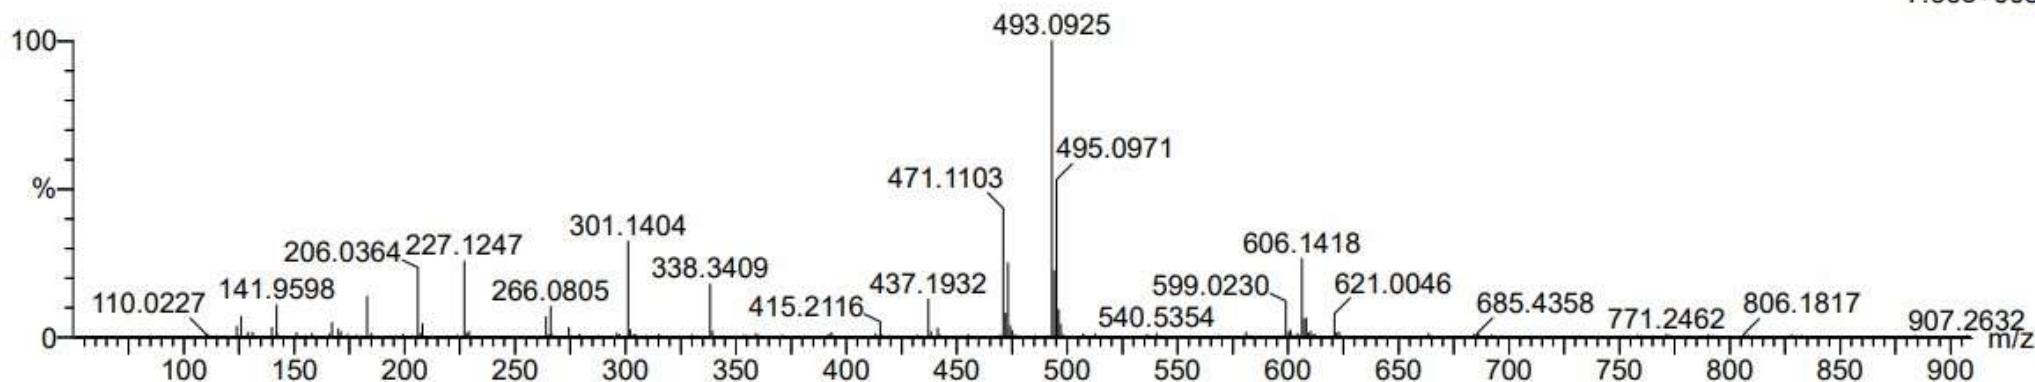

Minimum: -1.5  
Maximum: 2.0 50.0 50.0

| Mass     | Calc. Mass | mDa  | PPM  | DBE  | i-FIT | Norm | Conf(%) | Formula          |
|----------|------------|------|------|------|-------|------|---------|------------------|
| 471.1103 | 471.1112   | -0.9 | -1.9 | 18.5 | 606.1 | n/a  | n/a     | C27 H20 N2 O4 Cl |

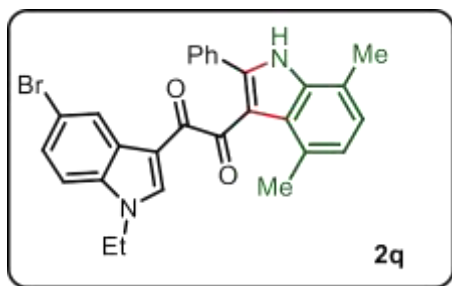

$^1\text{H NMR}$ , 400 MHz,  $\text{DMSO-d}_6$

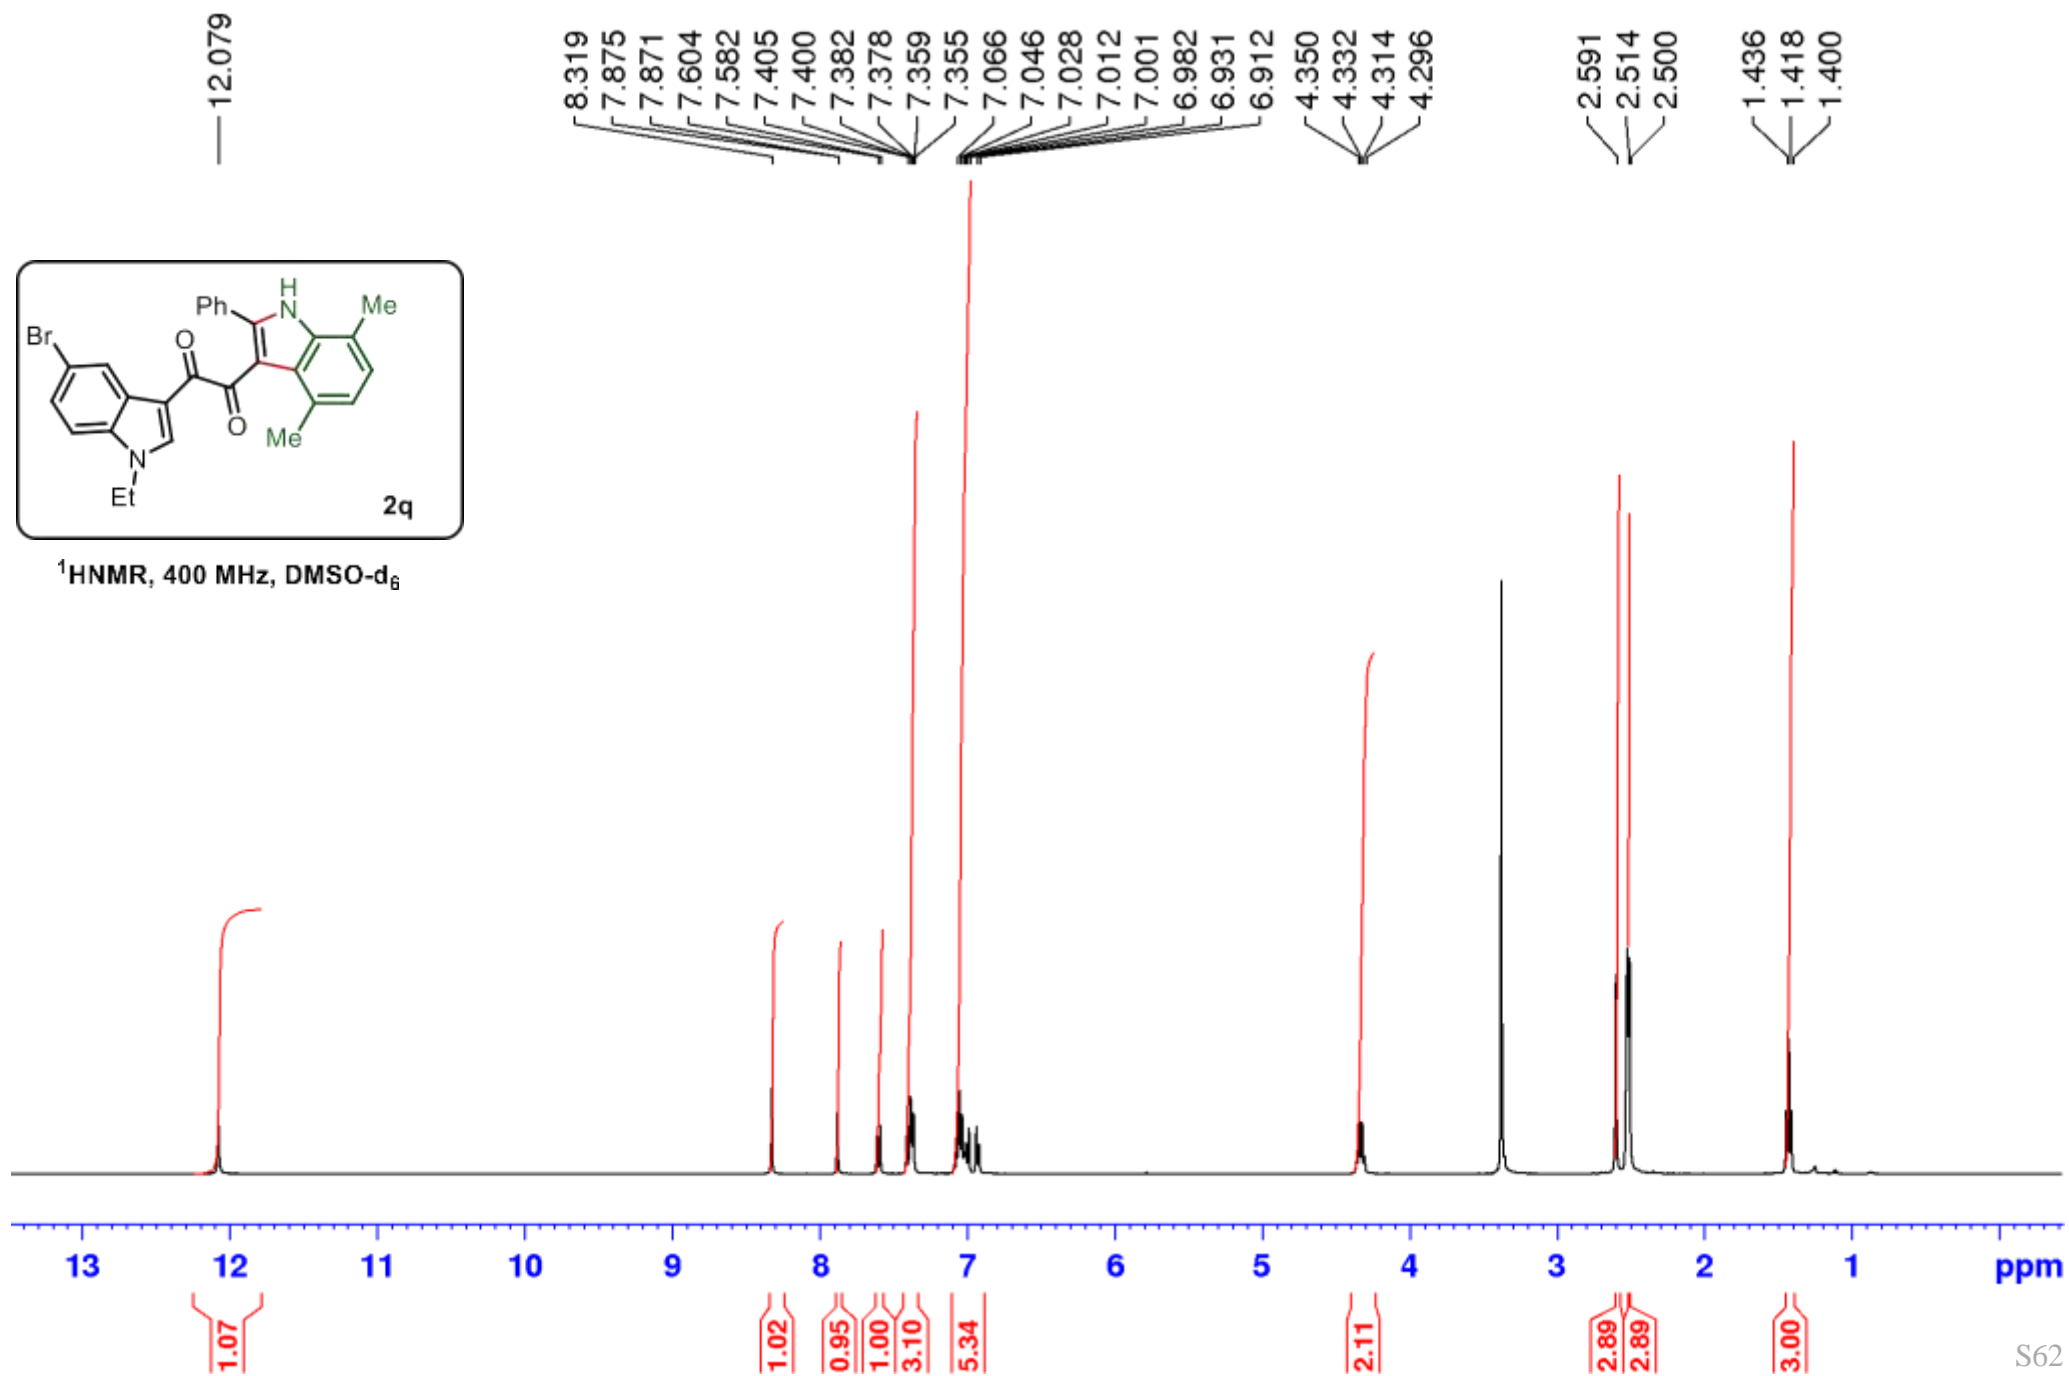

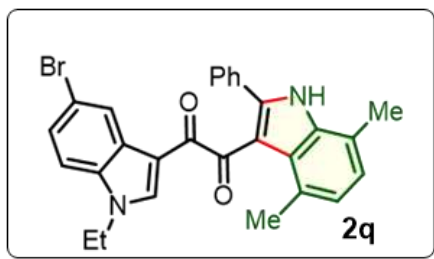

$^{13}\text{C}\{^1\text{H}\}$ NMR, 100MHz, DMSO- $\text{d}_6$

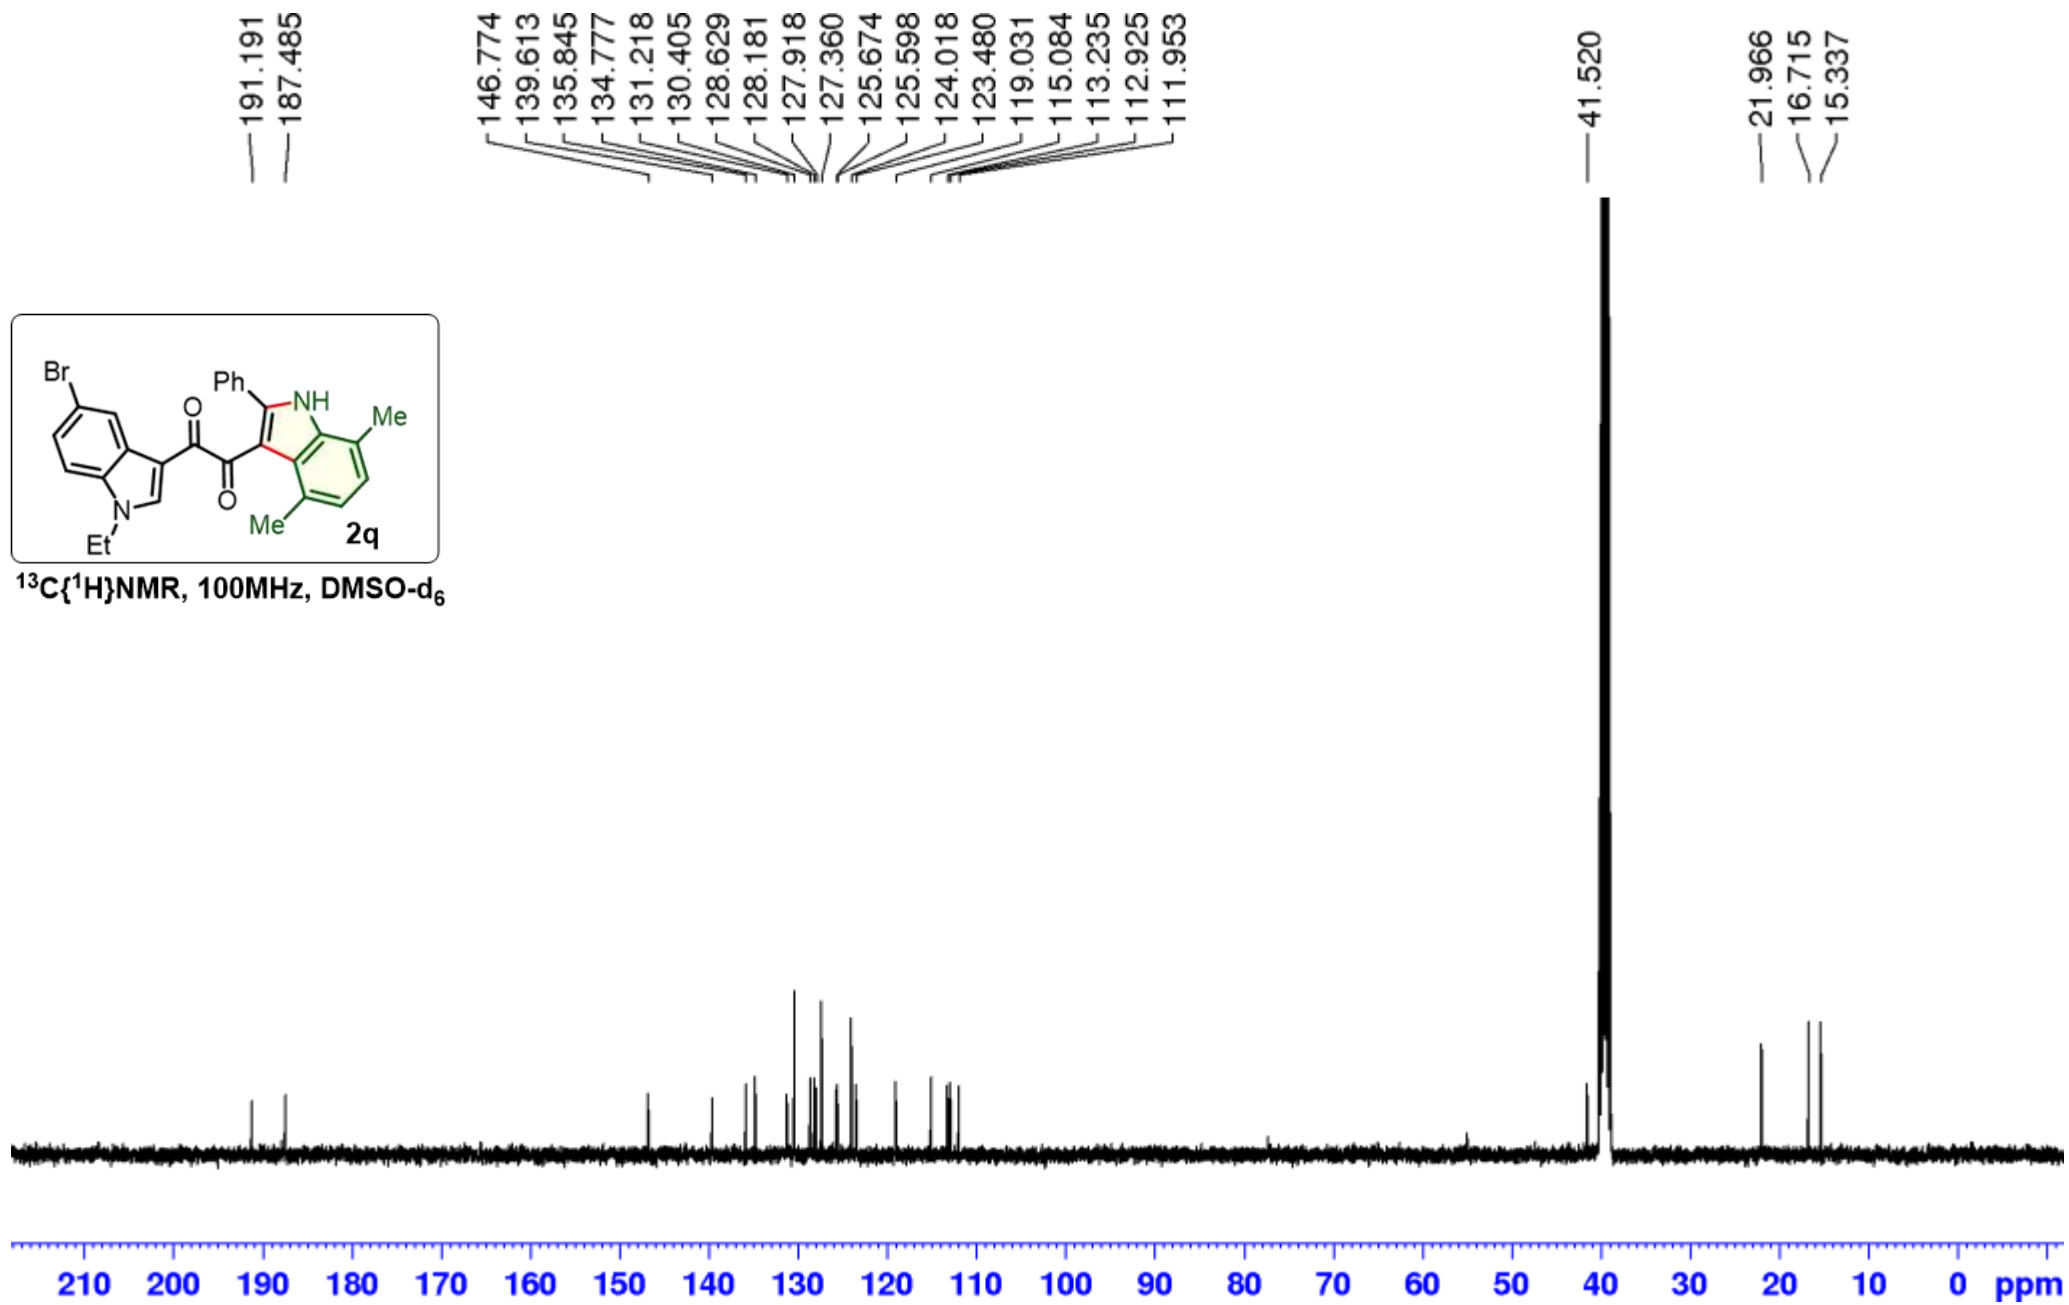

# Elemental Composition Report

## Single Mass Analysis

Tolerance = 100.0 PPM / DBE: min = -1.5, max = 50.0

Element prediction: Off

Number of isotope peaks used for i-FIT = 3

Monoisotopic Mass, Even Electron Ions

27 formula(e) evaluated with 1 results within limits (up to 3 closest results for each mass)

Elements Used:

C: 0-28 H: 0-100 N: 0-2 O: 0-2 Br: 0-1

NVD-94

QMI DIVISION, CSIR-IIIM JAMMU  
Xevo G2-XS QTOF YFC2015

06-Oct-2023

14:01:43

061023\_14 4 (0.104)

1: TOF MS ES+  
1.12e+005

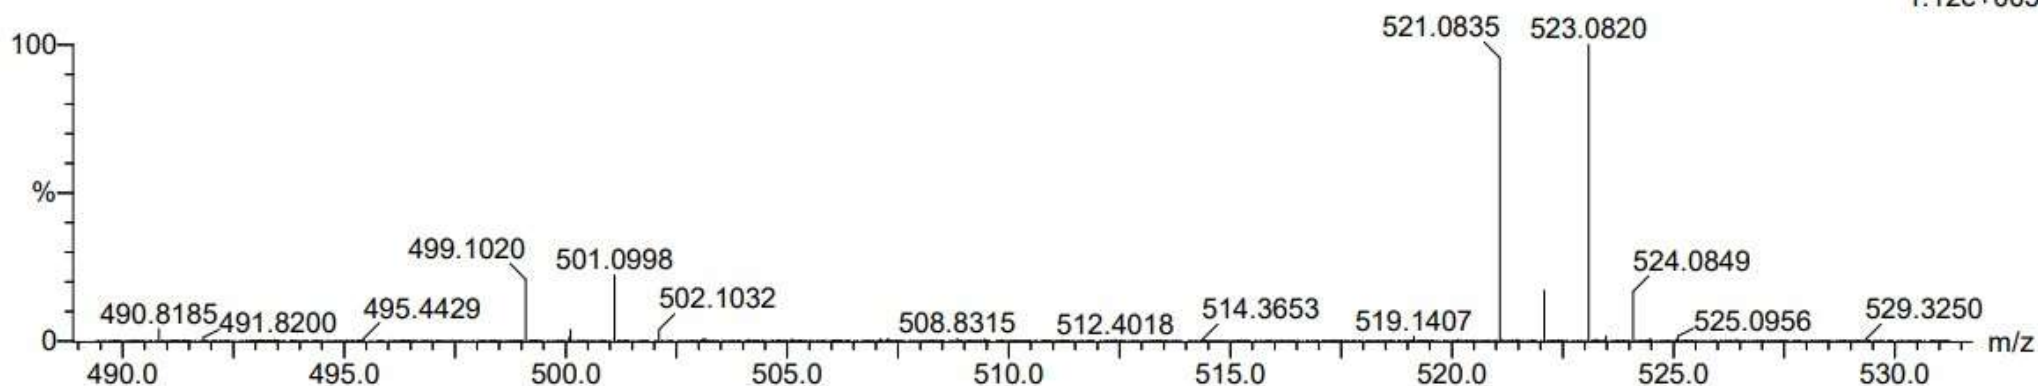

Minimum: -1.5  
Maximum: 2.0 100.0 50.0

| Mass     | Calc. Mass | mDa  | PPM  | DBE  | i-FIT | Norm | Conf(%) | Formula          |
|----------|------------|------|------|------|-------|------|---------|------------------|
| 499.1020 | 499.1021   | -0.1 | -0.2 | 17.5 | 517.0 | n/a  | n/a     | C28 H24 N2 O2 Br |



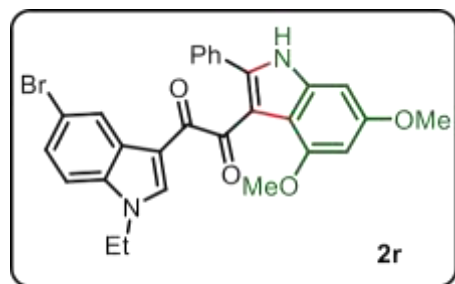

<sup>1</sup>HNMR, 400 MHz, DMSO-d<sub>6</sub>

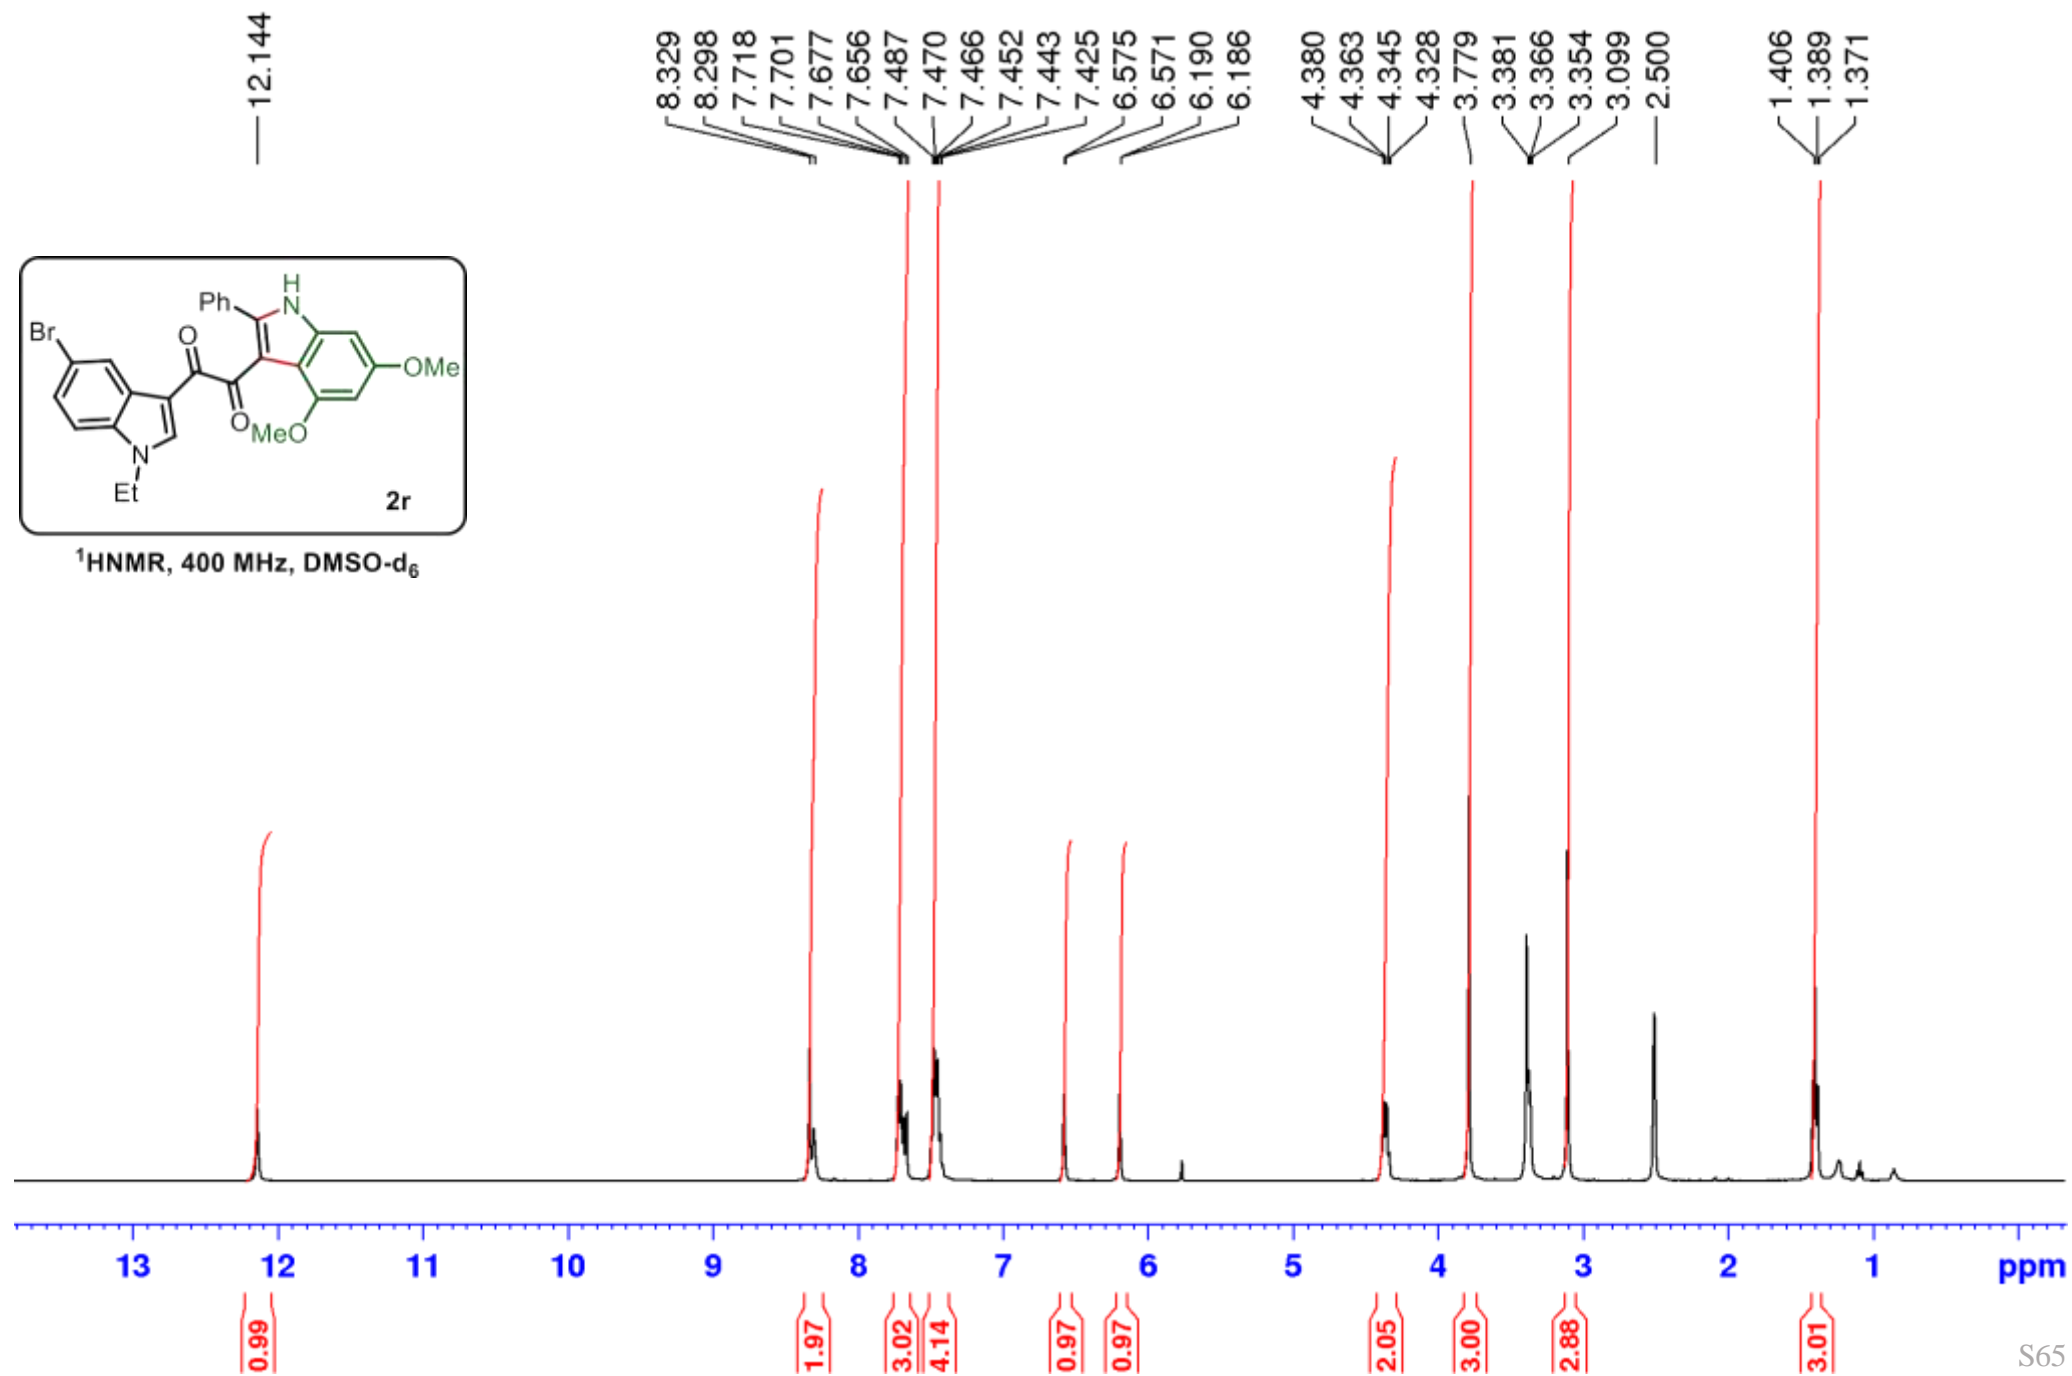

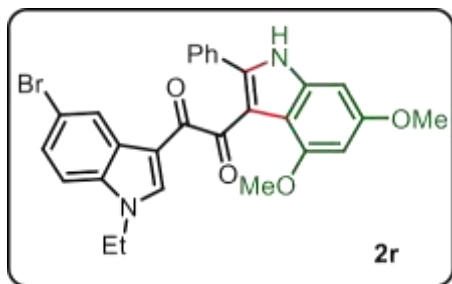

$^{13}\text{C}\{^1\text{H}\}$ NMR, 100 MHz,  $\text{CDCl}_3$

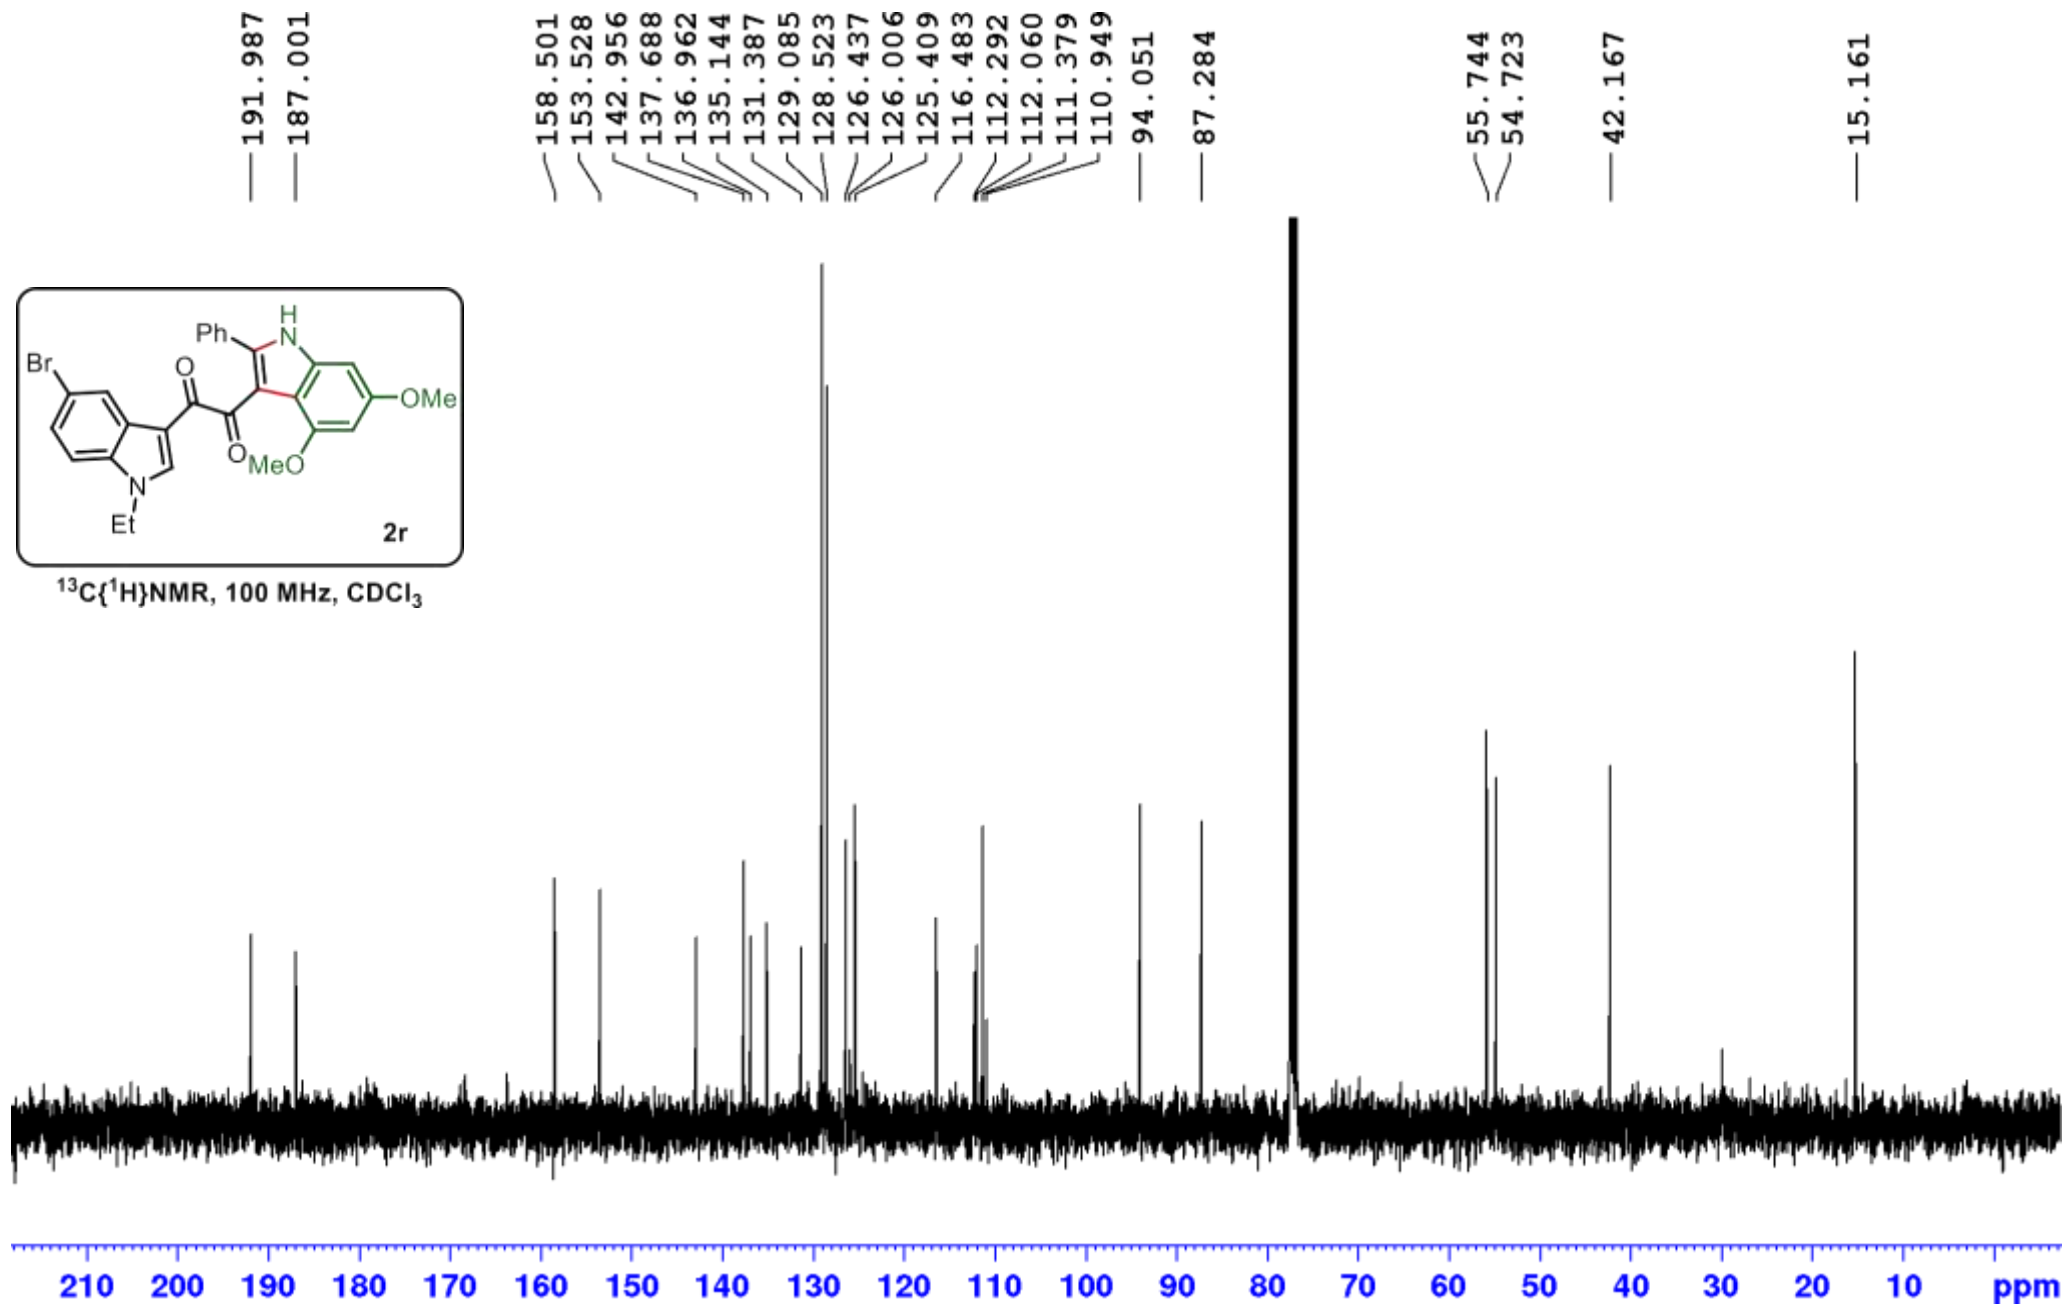

# Elemental Composition Report

## Single Mass Analysis

Tolerance = 10.0 PPM / DBE: min = -1.5, max = 50.0

Element prediction: Off

Number of isotope peaks used for i-FIT = 3

Monoisotopic Mass, Even Electron Ions

39 formula(e) evaluated with 1 results within limits (up to 3 closest results for each mass)

Elements Used:

C: 0-28 H: 0-100 N: 0-2 O: 0-4 Br: 0-1

NVD-66

QMI DIVISION, CSIR-IIIM JAMMU  
Xevo G2-XS QTOF YFC2015

04-Mar-2024

13:31:14

040324\_08 6 (0.138)

1: TOF MS ES+  
5.08e+006

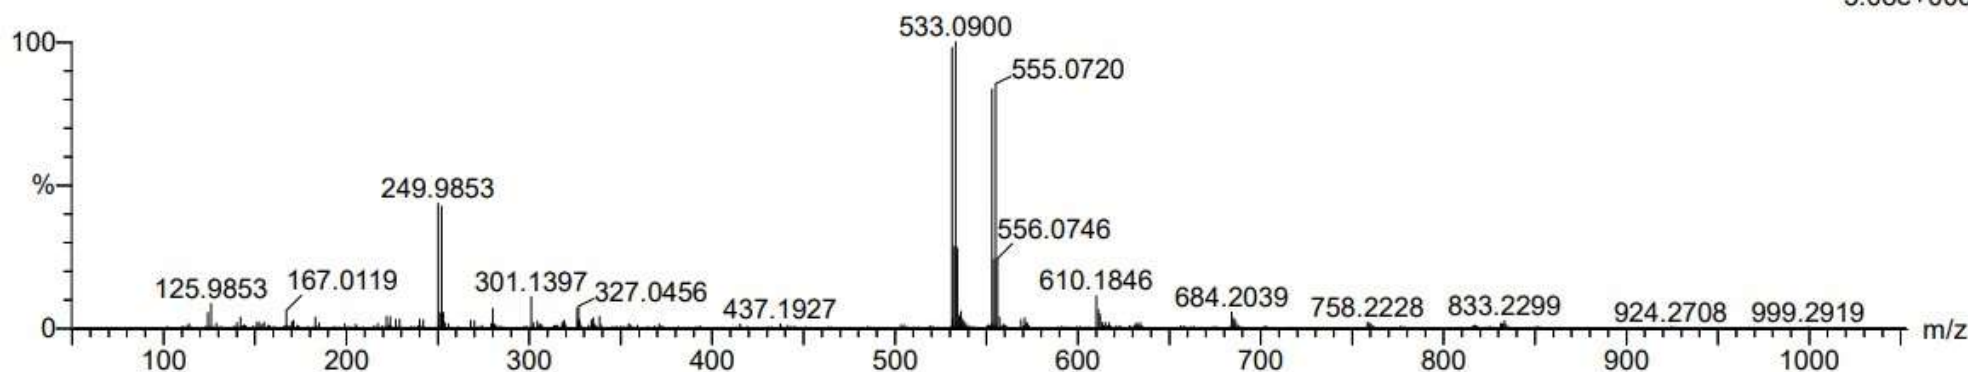

Minimum: -1.5  
Maximum: 2.0 10.0 50.0

| Mass     | Calc. Mass | mDa  | PPM  | DBE  | i-FIT | Norm | Conf (%) | Formula          |
|----------|------------|------|------|------|-------|------|----------|------------------|
| 531.0916 | 531.0919   | -0.3 | -0.6 | 17.5 | 873.6 | n/a  | n/a      | C28 H24 N2 O4 Br |

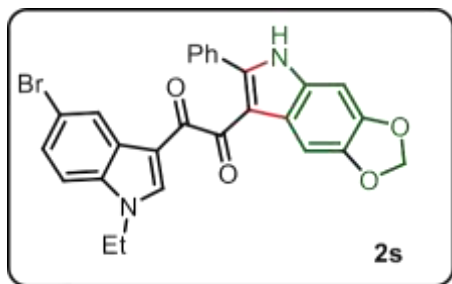

<sup>1</sup>HNMR, 400 MHz, DMSO-d<sub>6</sub>

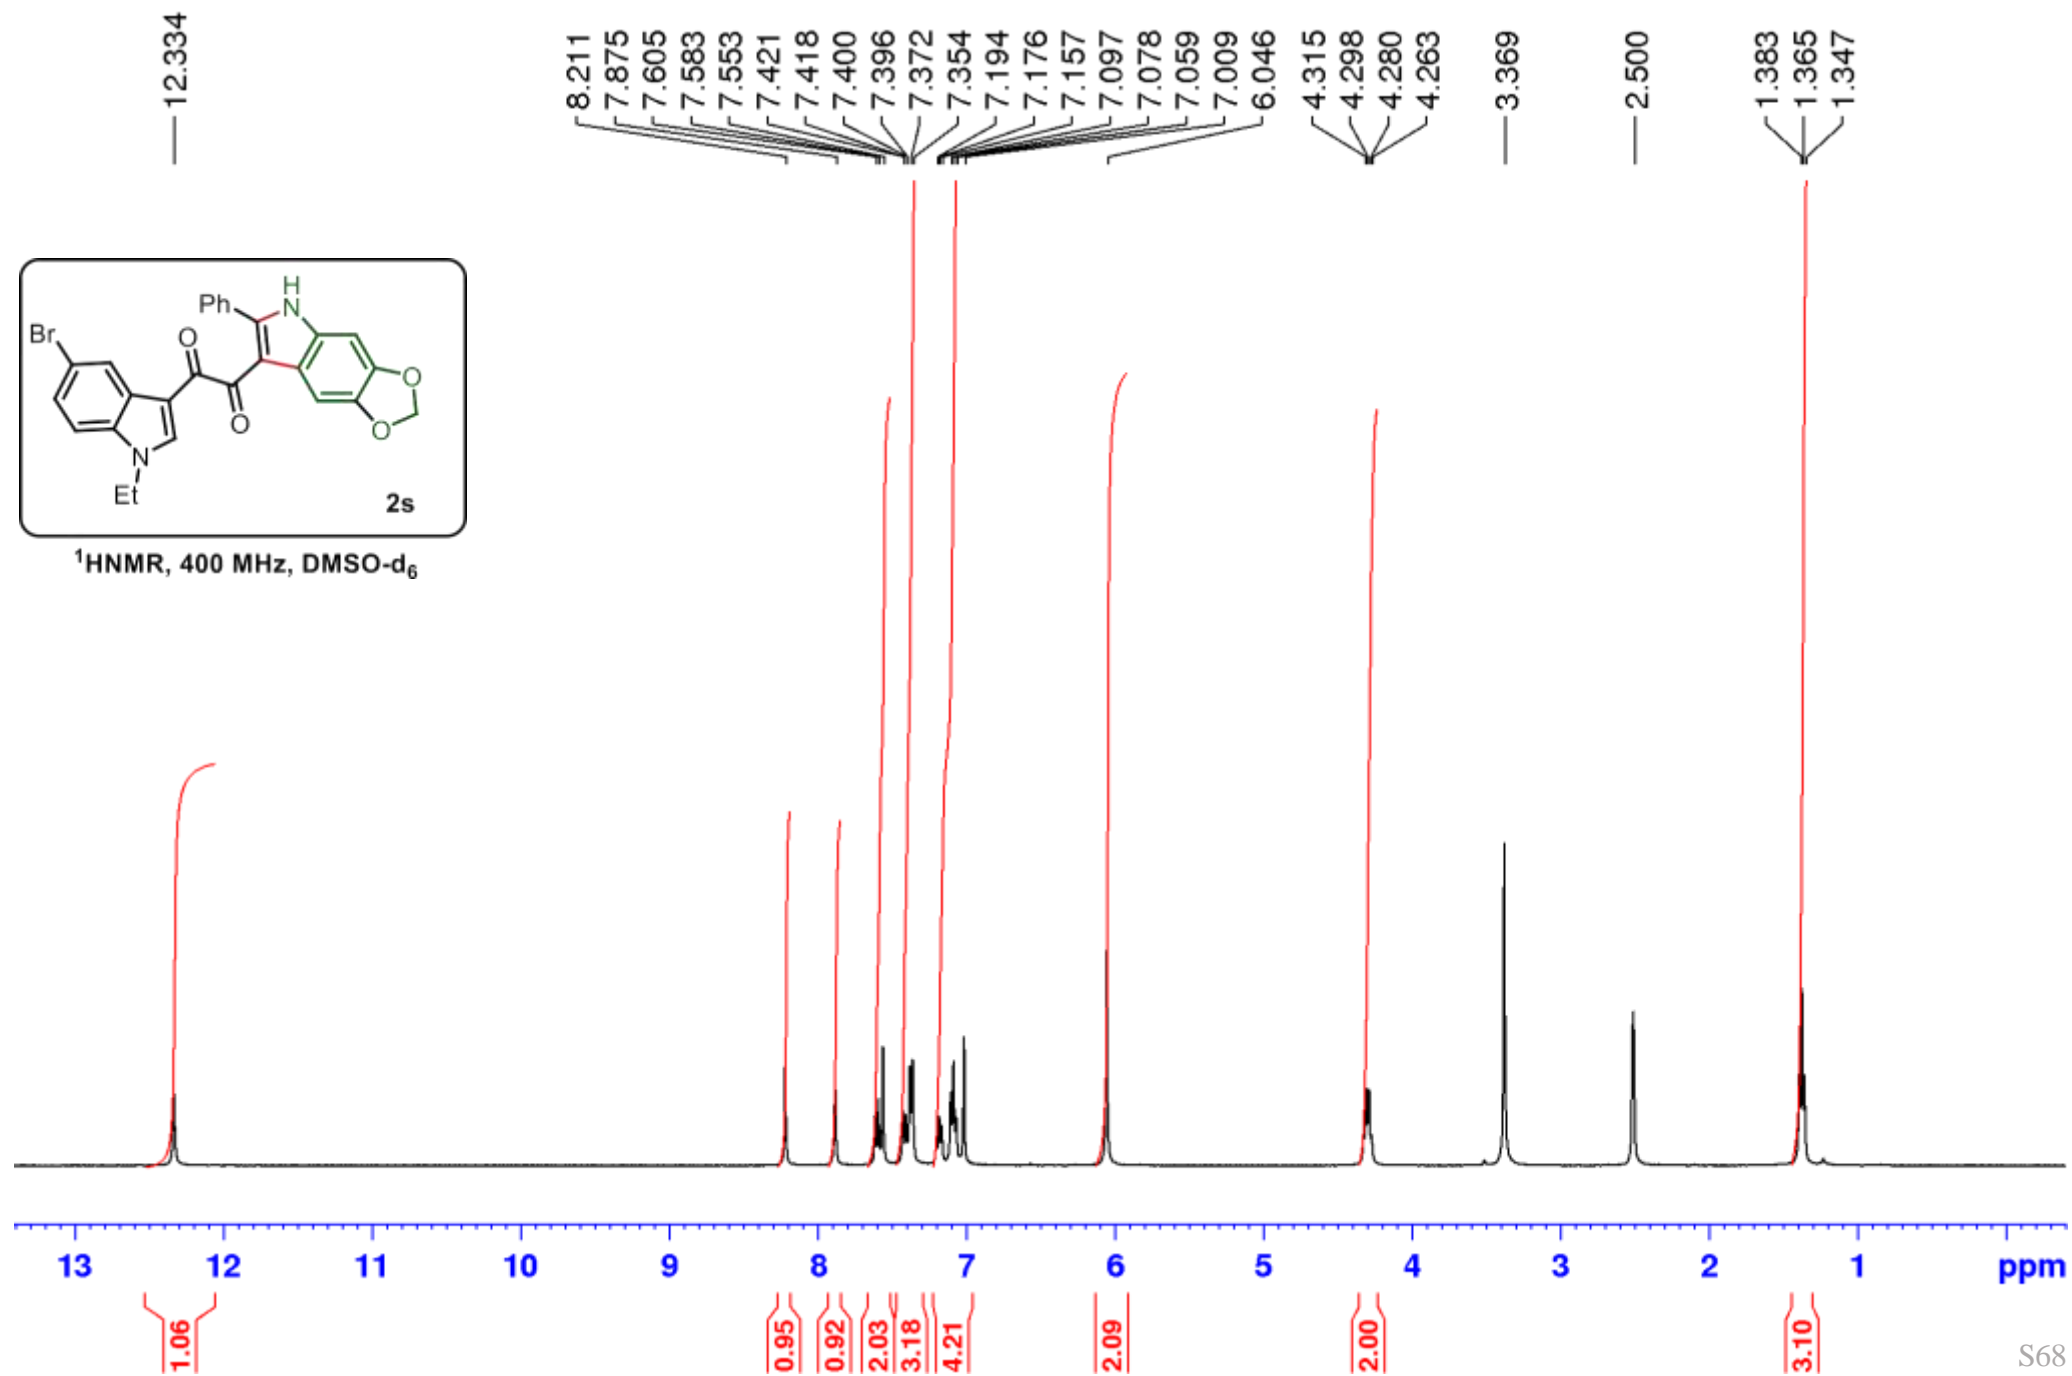

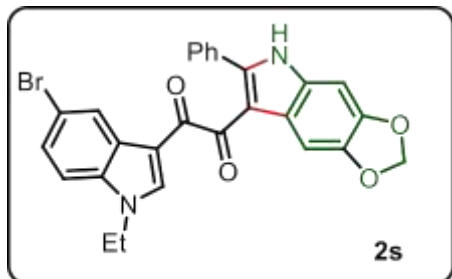

$^{13}\text{C}\{^1\text{H}\}\text{NMR}$ , 100 MHz,  $\text{DMSO-d}_6$

190.467  
188.659

146.571  
145.440  
144.805  
139.460  
135.231  
131.374  
131.032  
129.752  
128.943  
127.901  
127.689  
126.023  
123.619  
121.564  
115.438  
113.230  
112.127  
110.256  
101.139  
99.968  
93.095

41.757

15.403

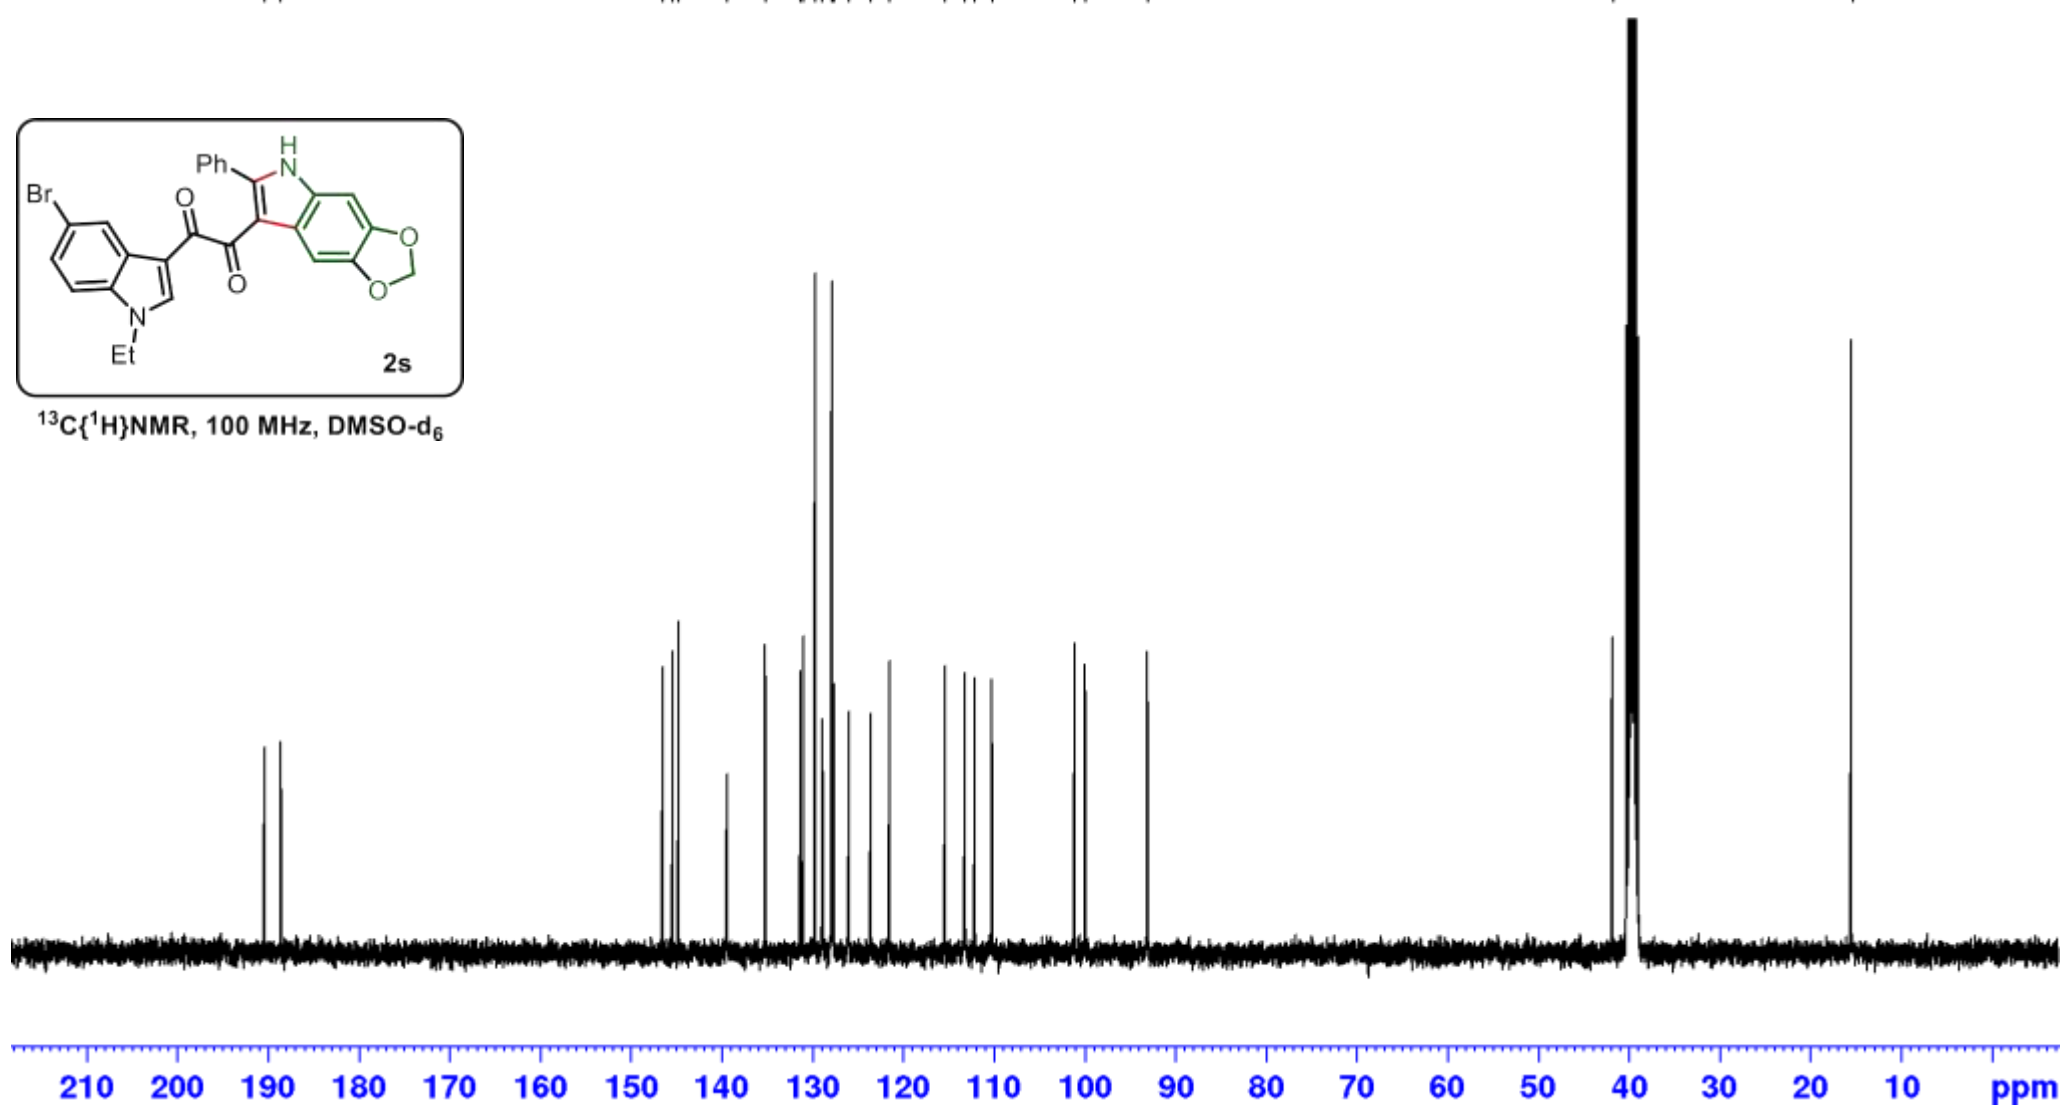

# Elemental Composition Report

## Single Mass Analysis

Tolerance = 20.0 PPM / DBE: min = -1.5, max = 50.0

Element prediction: Off

Number of isotope peaks used for i-FIT = 3

Monoisotopic Mass, Even Electron Ions

40 formula(e) evaluated with 1 results within limits (up to 3 closest results for each mass)

Elements Used:

C: 0-27 H: 0-100 N: 0-2 O: 0-4 Br: 0-1

NVD-93

QMI DIVISION, CSIR-IIIM JAMMU  
Xevo G2-XS QTOF YFC2015

28-Mar-2024

15:27:49

280324\_03 6 (0.138)

1: TOF MS ES-  
3.88e+006

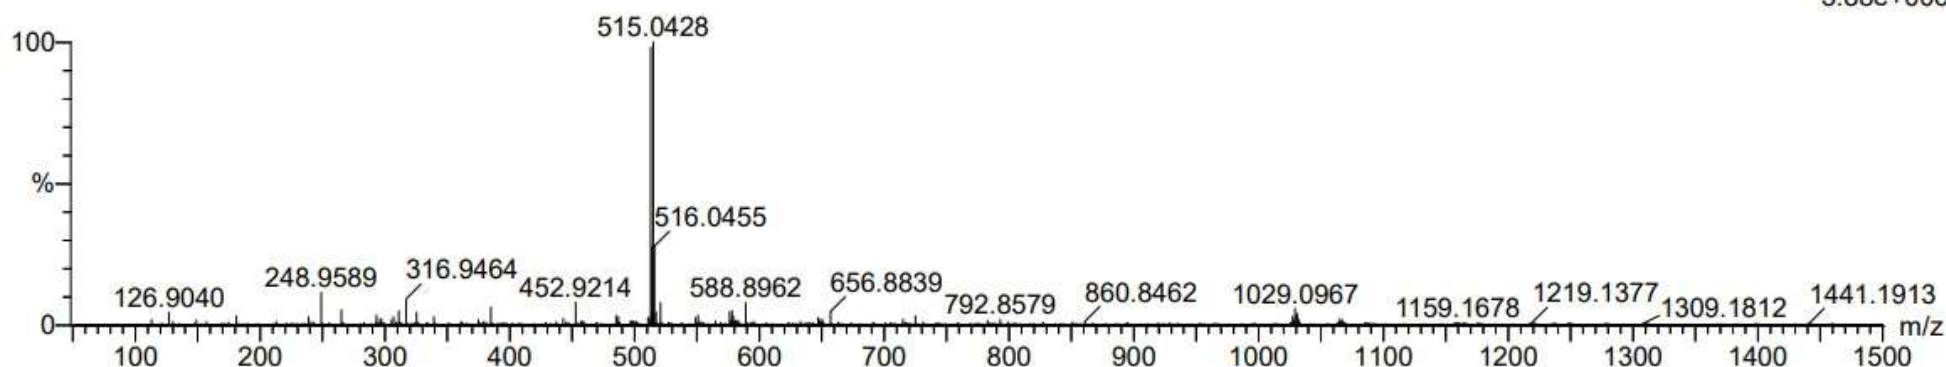

Minimum: -1.5  
Maximum: 2.0 20.0 50.0

| Mass     | Calc. Mass | mDa  | PPM  | DBE  | i-FIT | Norm | Conf (%) | Formula          |
|----------|------------|------|------|------|-------|------|----------|------------------|
| 513.0445 | 513.0450   | -0.5 | -1.0 | 19.5 | 952.6 | n/a  | n/a      | C27 H18 N2 O4 Br |

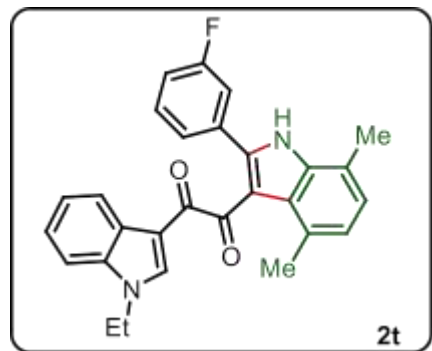

$^1\text{H NMR}$ , 400 MHz,  $\text{DMSO-d}_6$

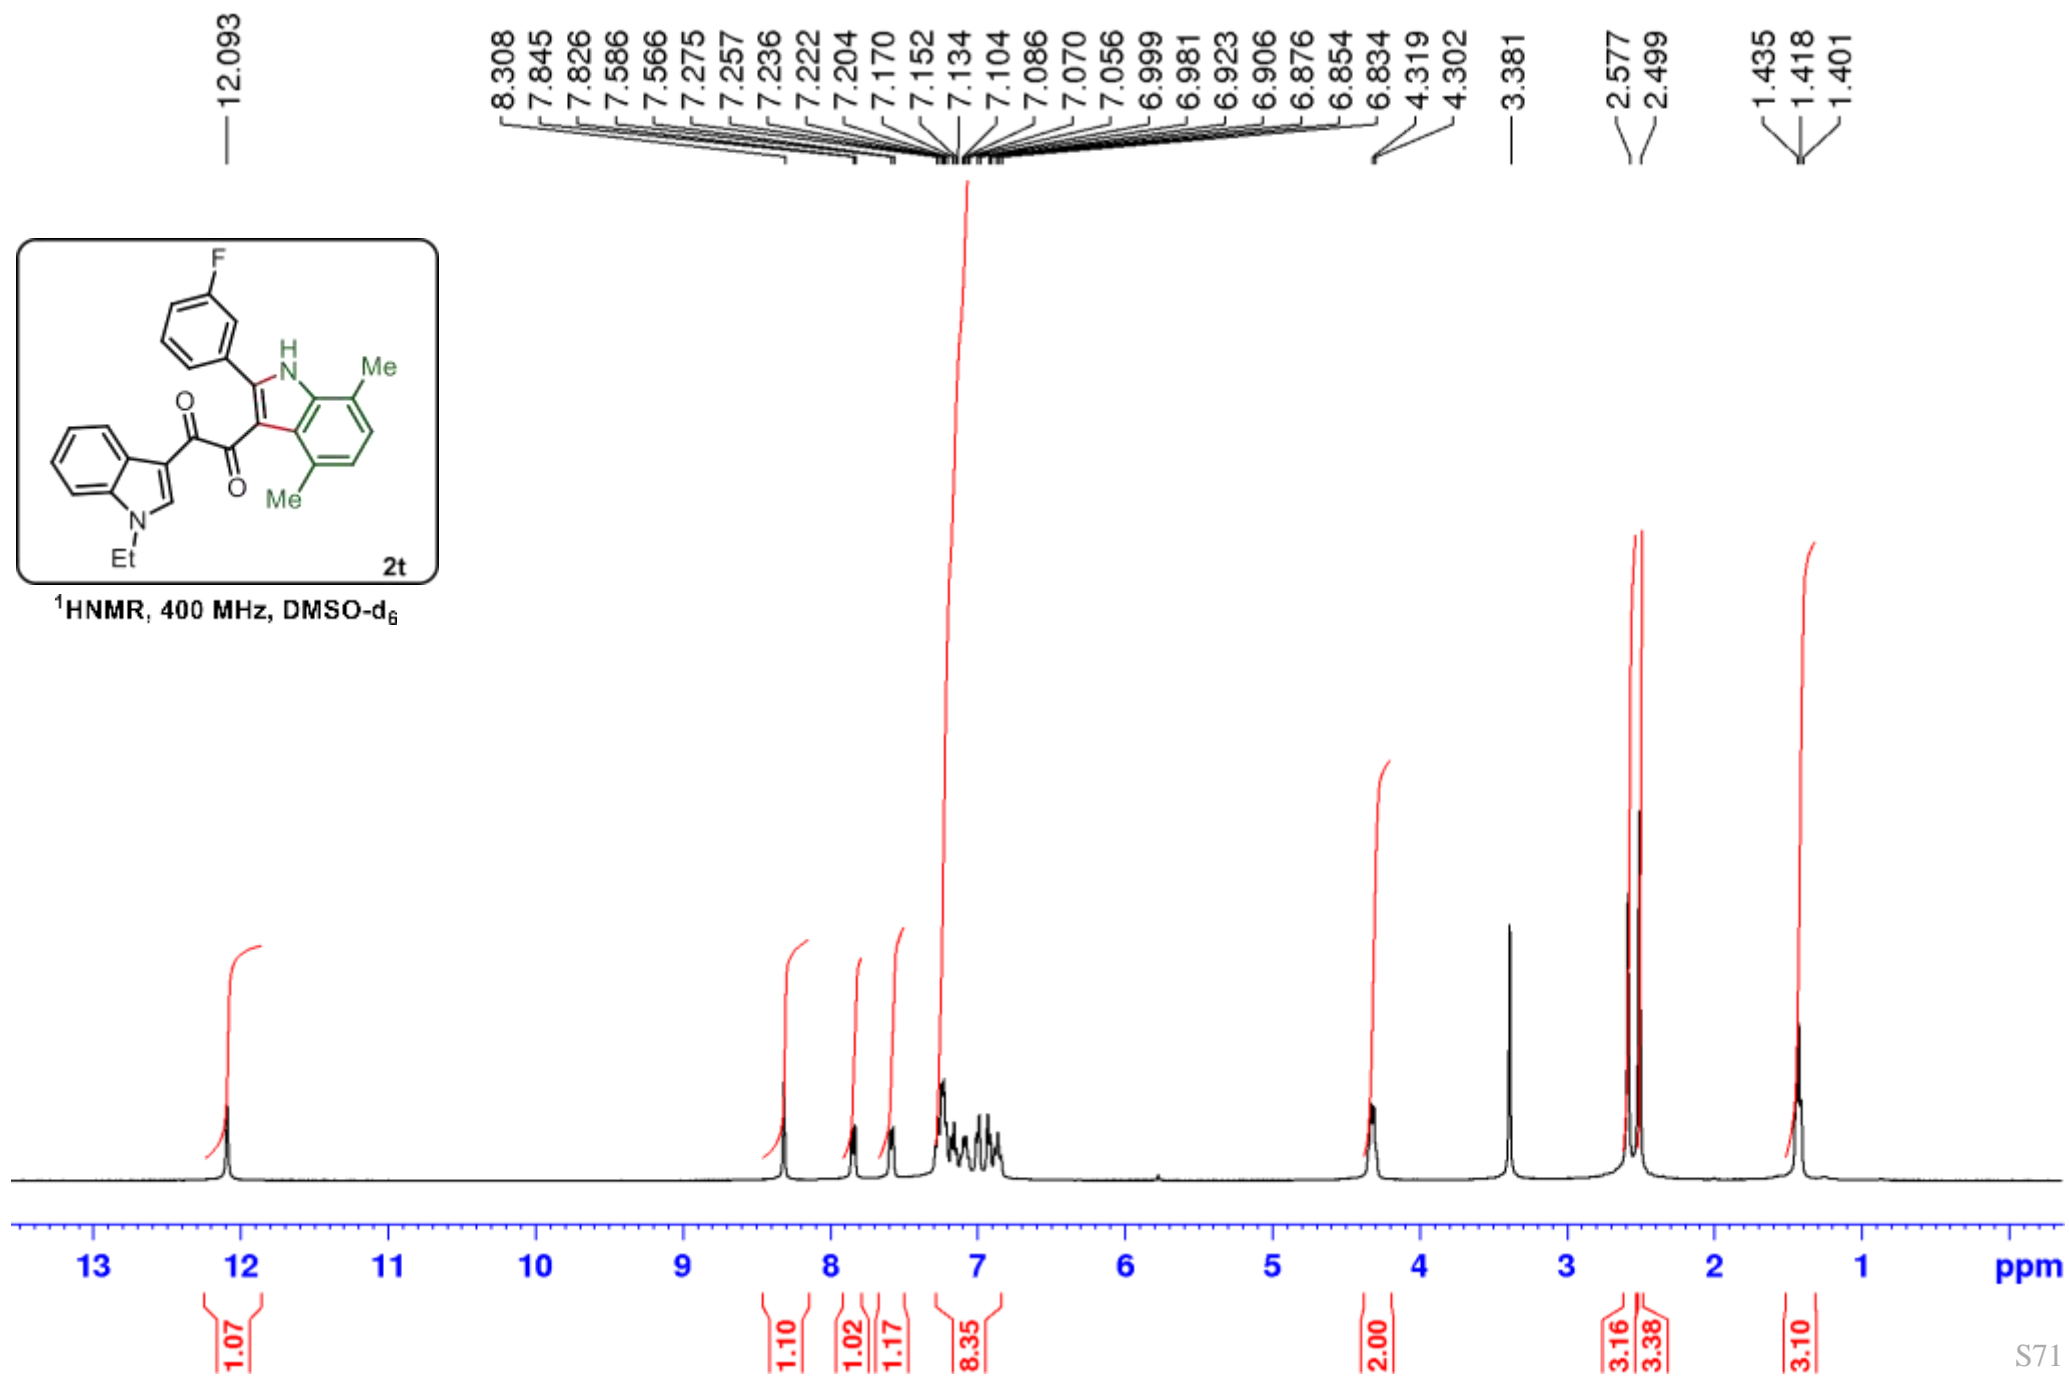

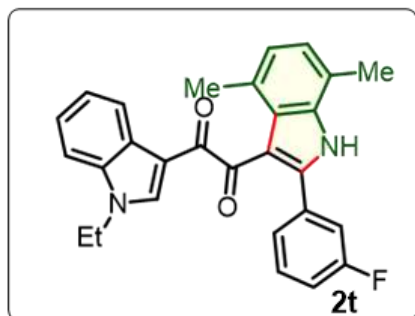

$^{13}\text{C}\{^1\text{H}\}$ NMR, 100MHz, DMSO- $\text{d}_6$

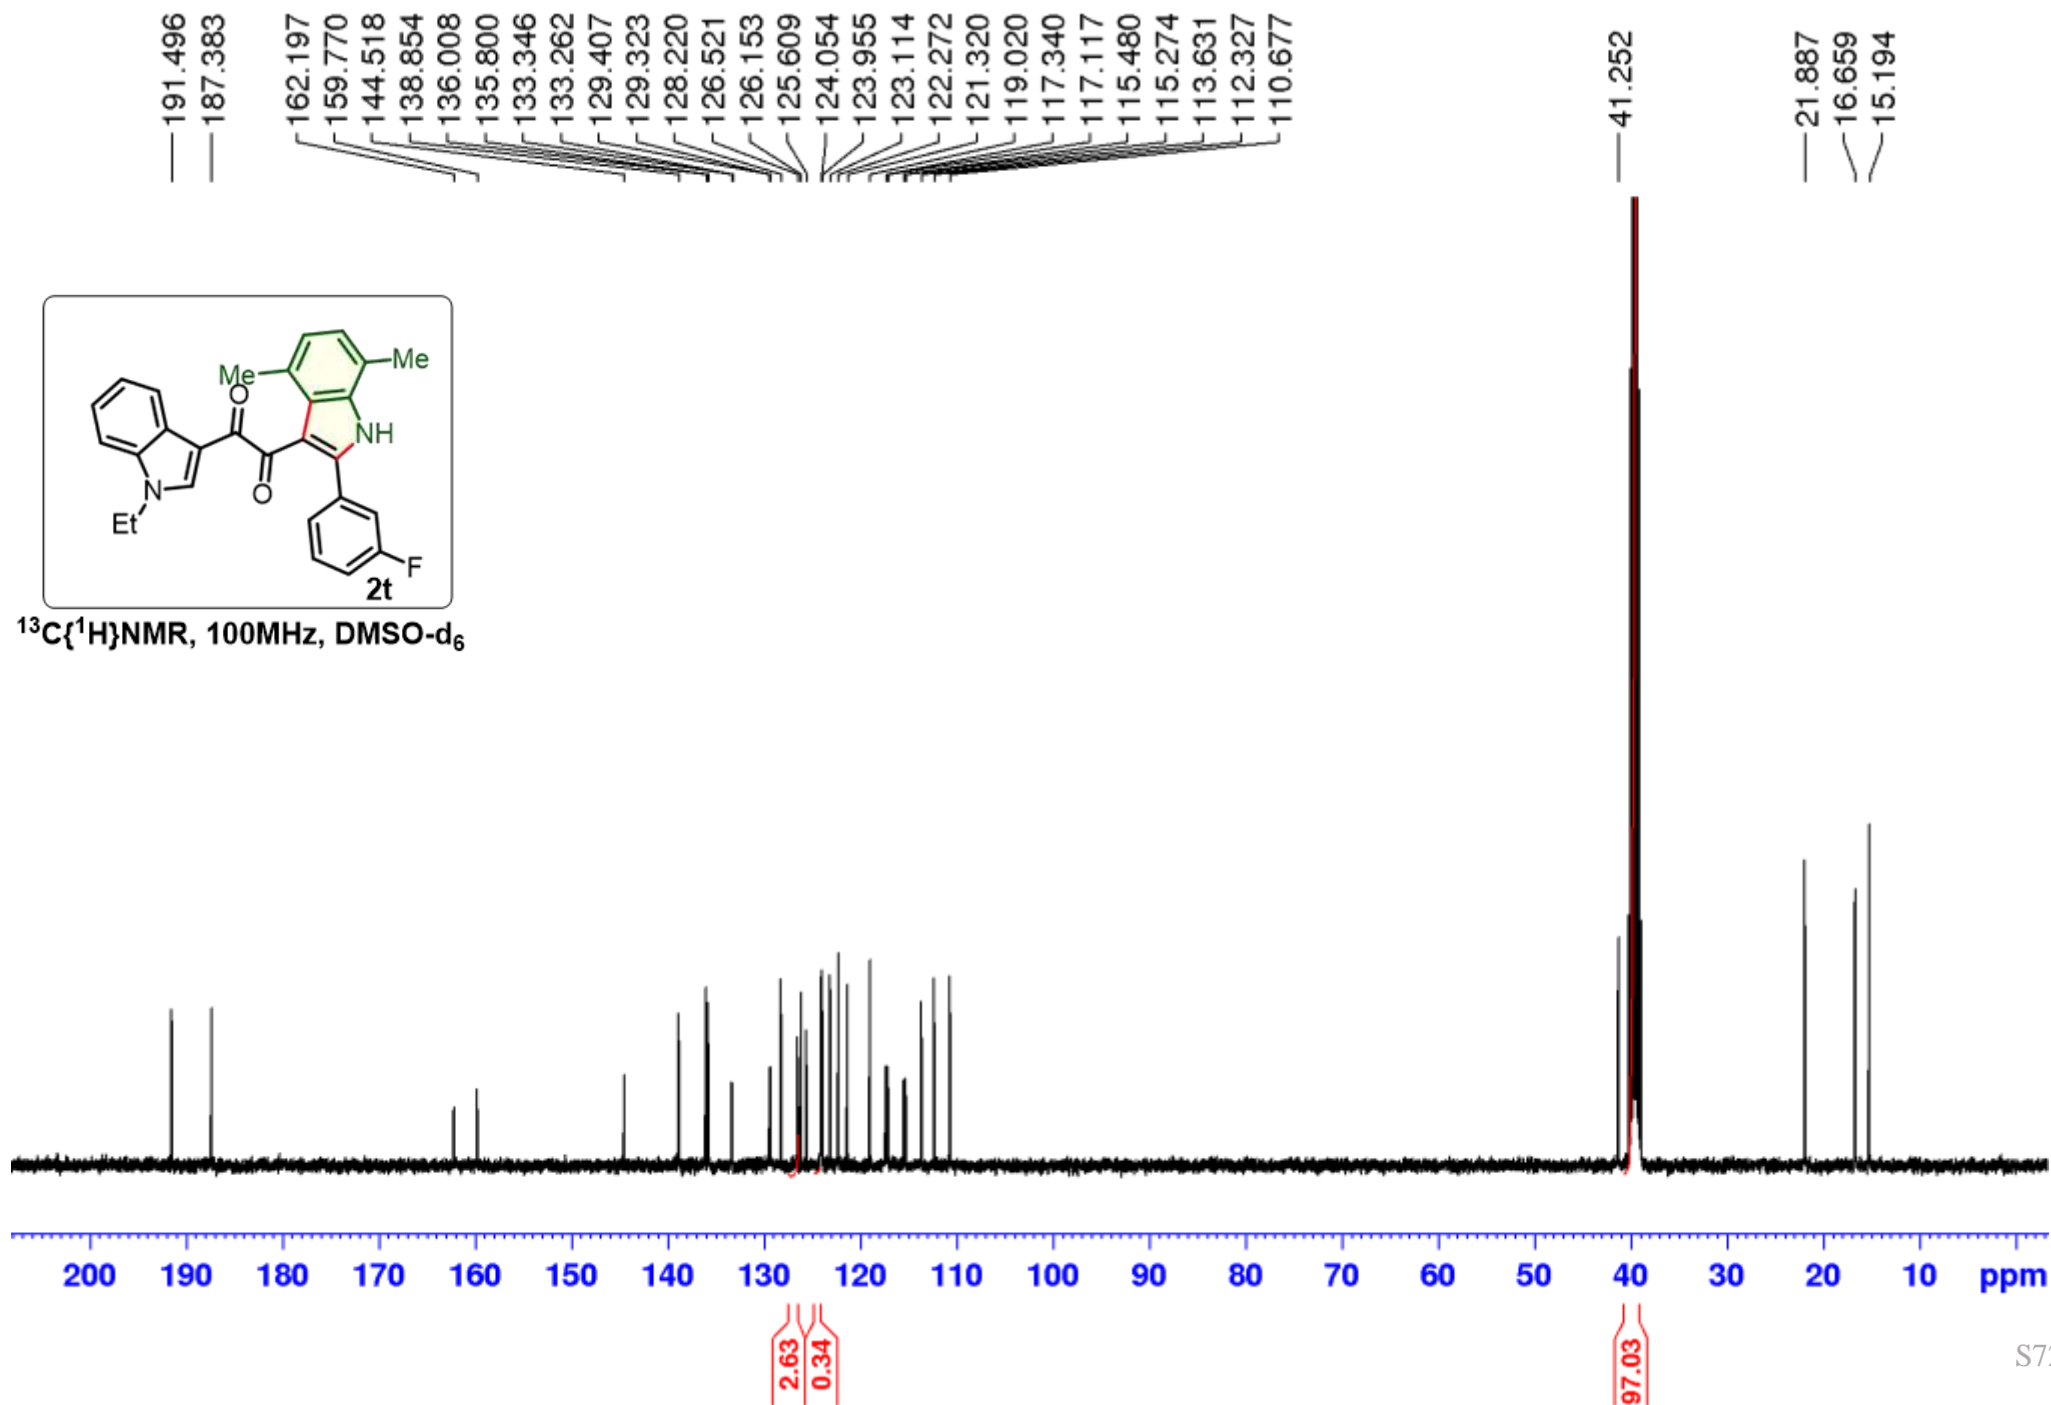



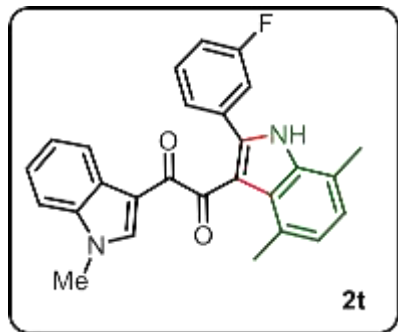

-133.161  
-133.185  
-133.201  
-133.224

<sup>19</sup>F NMR, 376 MHz, DMSO-d<sub>6</sub>

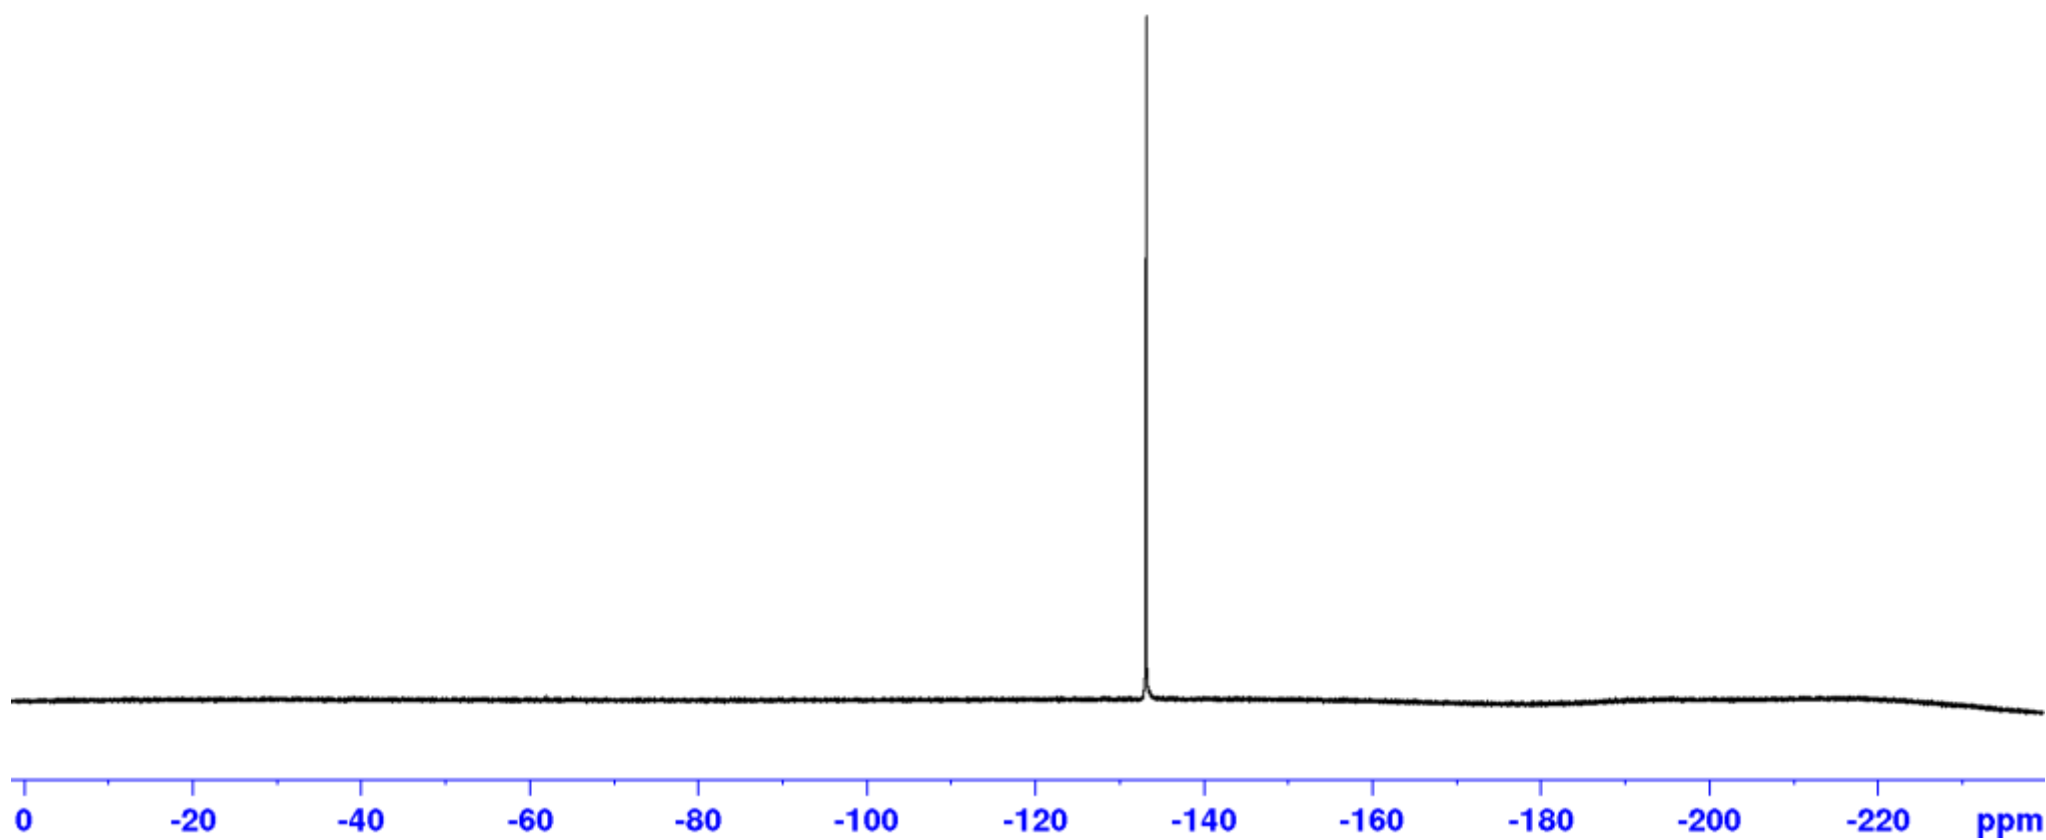

# Elemental Composition Report

## Single Mass Analysis

Tolerance = 50.0 PPM / DBE: min = -1.5, max = 50.0

Element prediction: Off

Number of isotope peaks used for i-FIT = 3

Monoisotopic Mass, Even Electron Ions

28 formula(e) evaluated with 1 results within limits (up to 3 closest results for each mass)

Elements Used:

C: 0-28 H: 0-100 N: 0-2 O: 0-2 F: 0-1

NVD-98

QMI DIVISION, CSIR-IIIM JAMMU  
Xevo G2-XS QTOF YFC2015

11-Oct-2023

13:23:05

1: TOF MS ES+

4.45e+006

111023\_04 7 (0.155)

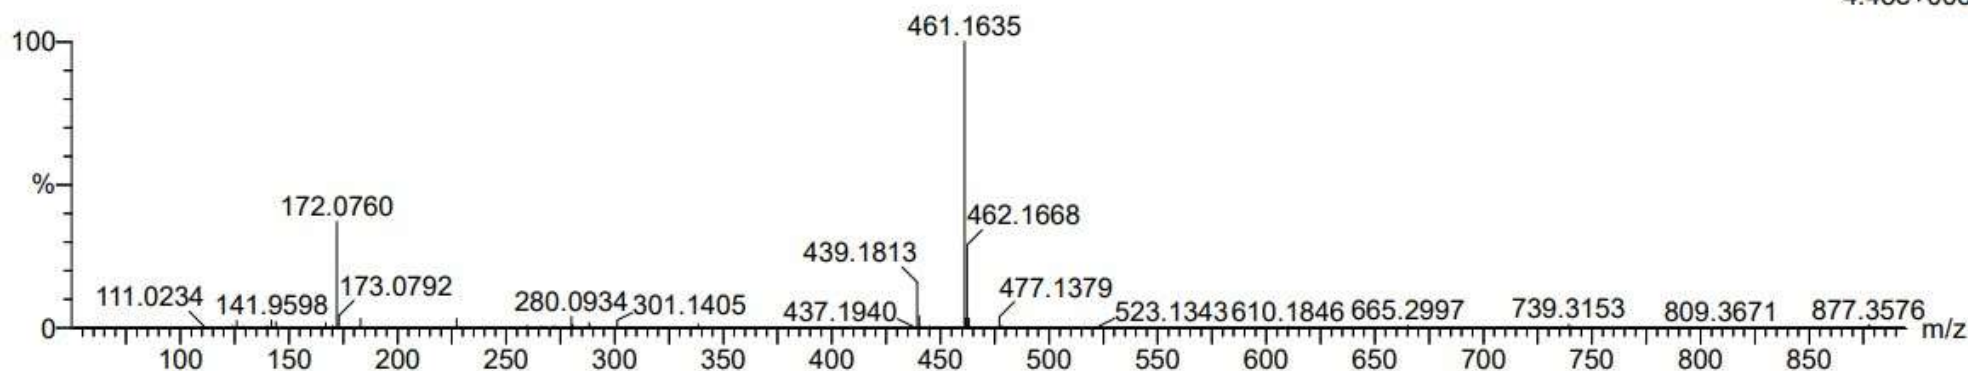

Minimum: -1.5  
Maximum: 2.0 50.0 50.0

| Mass     | Calc. Mass | mDa  | PPM  | DBE  | i-FIT | Norm | Conf(%) | Formula         |
|----------|------------|------|------|------|-------|------|---------|-----------------|
| 439.1813 | 439.1822   | -0.9 | -2.0 | 17.5 | 632.7 | n/a  | n/a     | C28 H24 N2 O2 F |

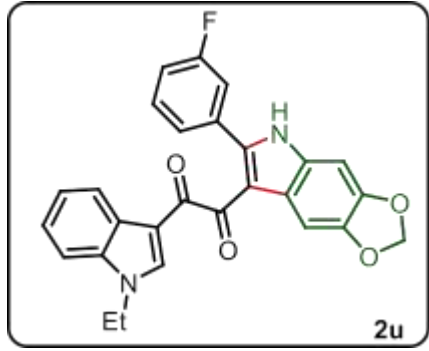

<sup>1</sup>HNMR, 400 MHz, DMSO-d<sub>6</sub>

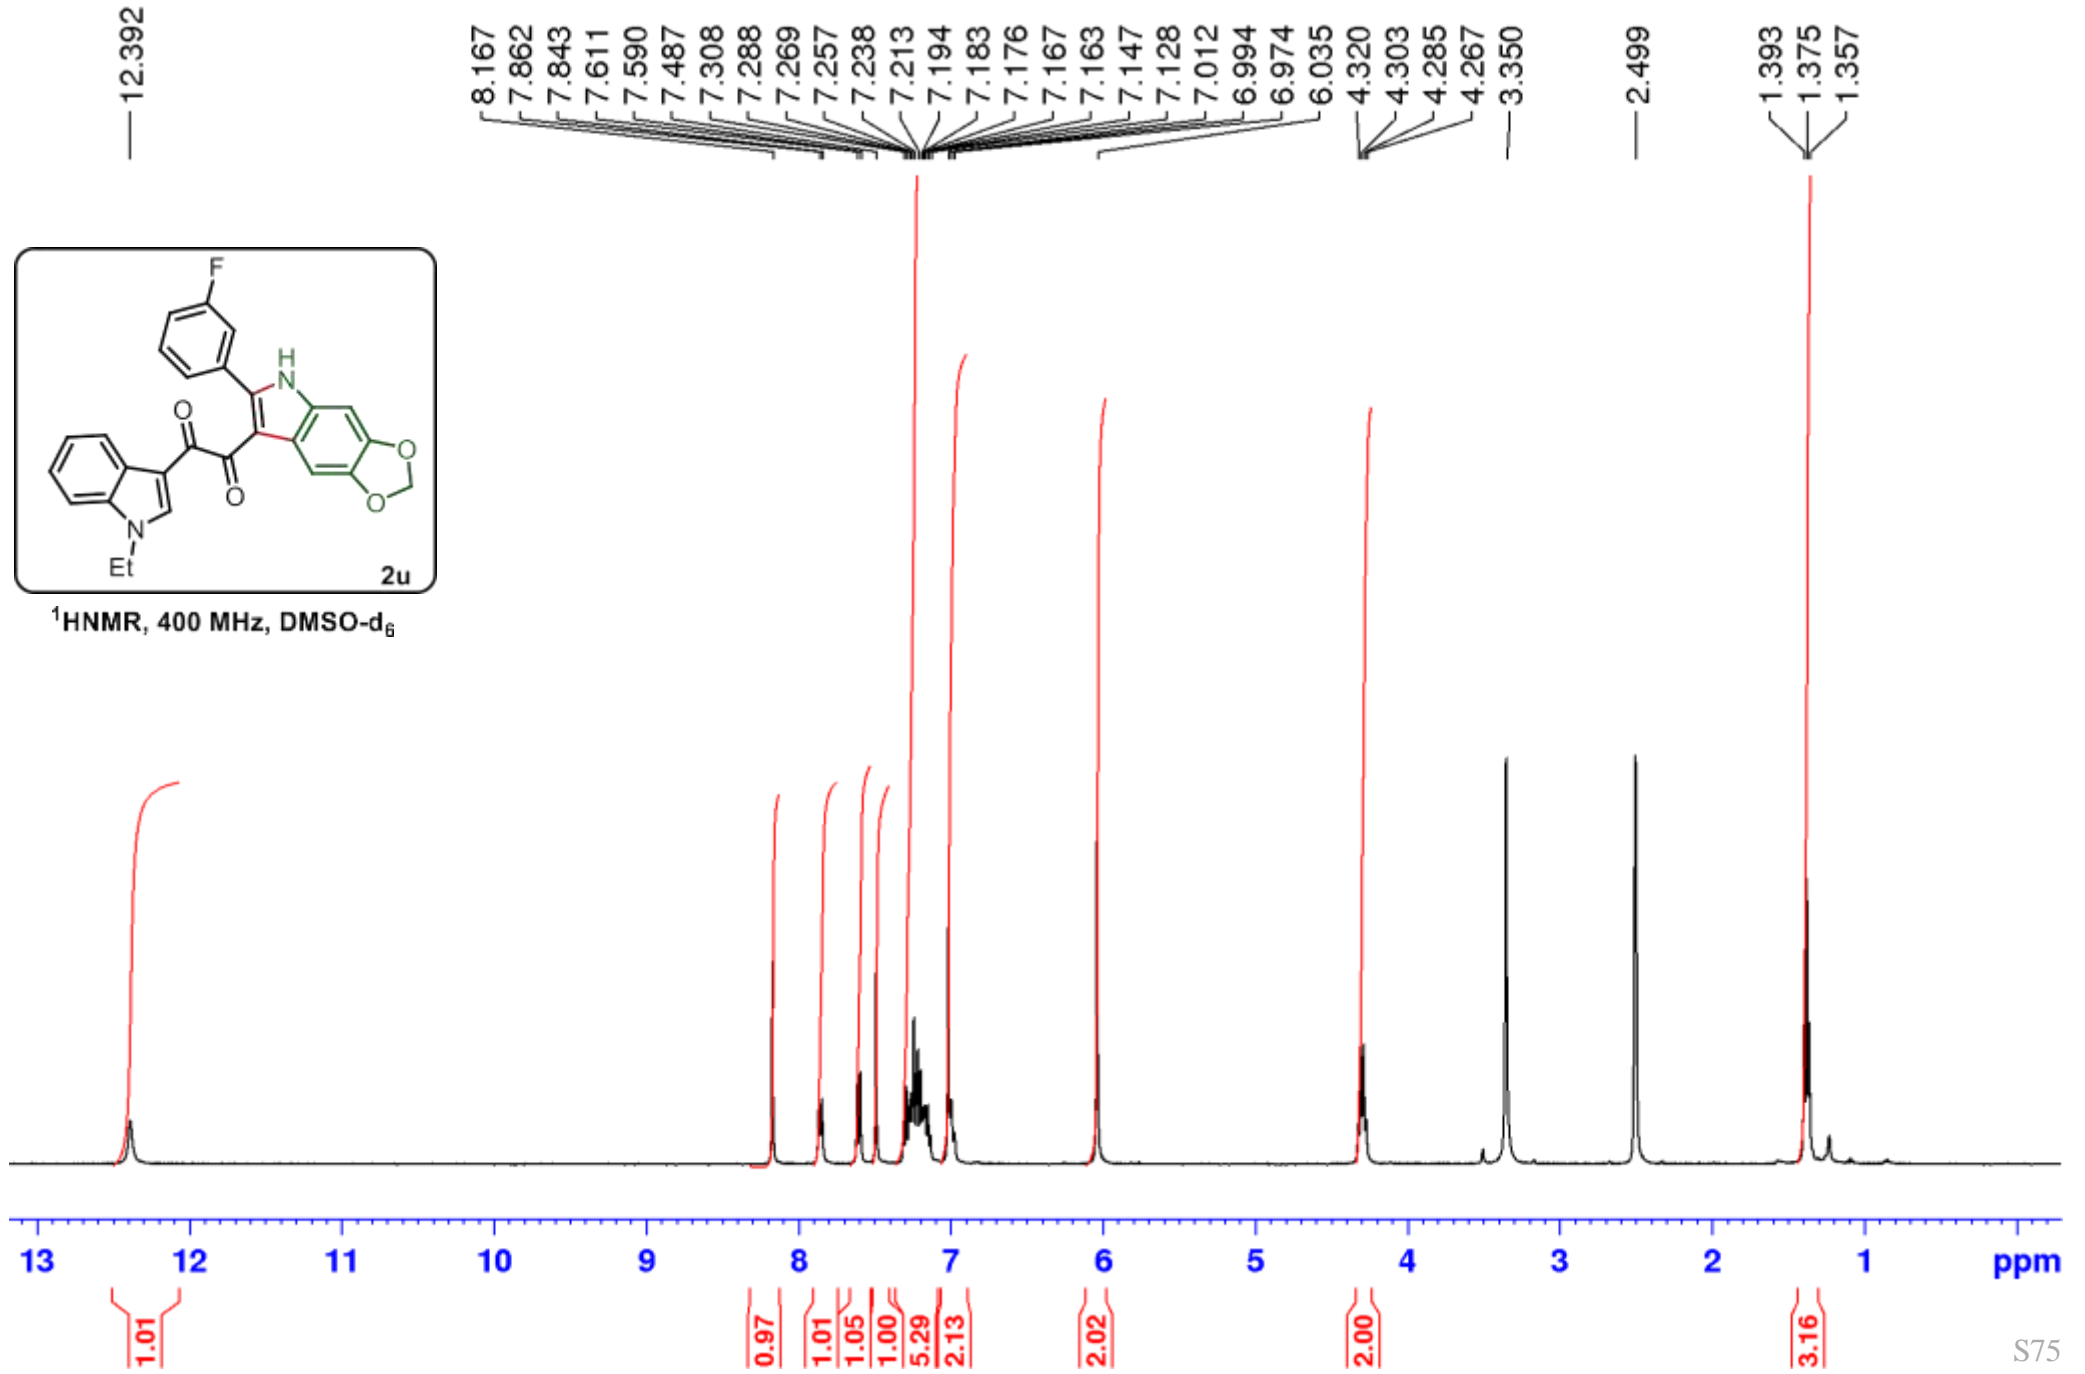

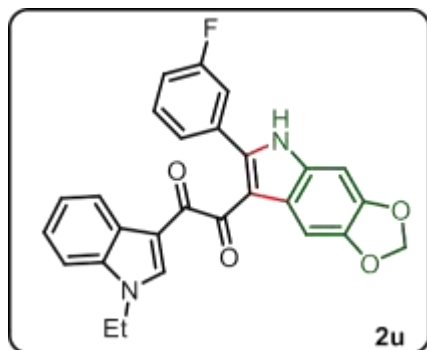

$^{13}\text{C}\{^1\text{H}\}$ NMR, 100 MHz,  $\text{DMSO-d}_6$

190.706  
188.857  
162.599  
160.173  
145.575  
144.878  
144.383  
138.782  
136.508  
133.512  
133.428  
131.066  
129.975  
129.891  
125.946  
125.876  
125.854  
123.604  
122.758  
121.504  
121.417  
116.870  
116.644  
115.909  
115.701  
112.530  
111.060  
110.545  
101.172  
99.903  
93.071

41.540

15.381

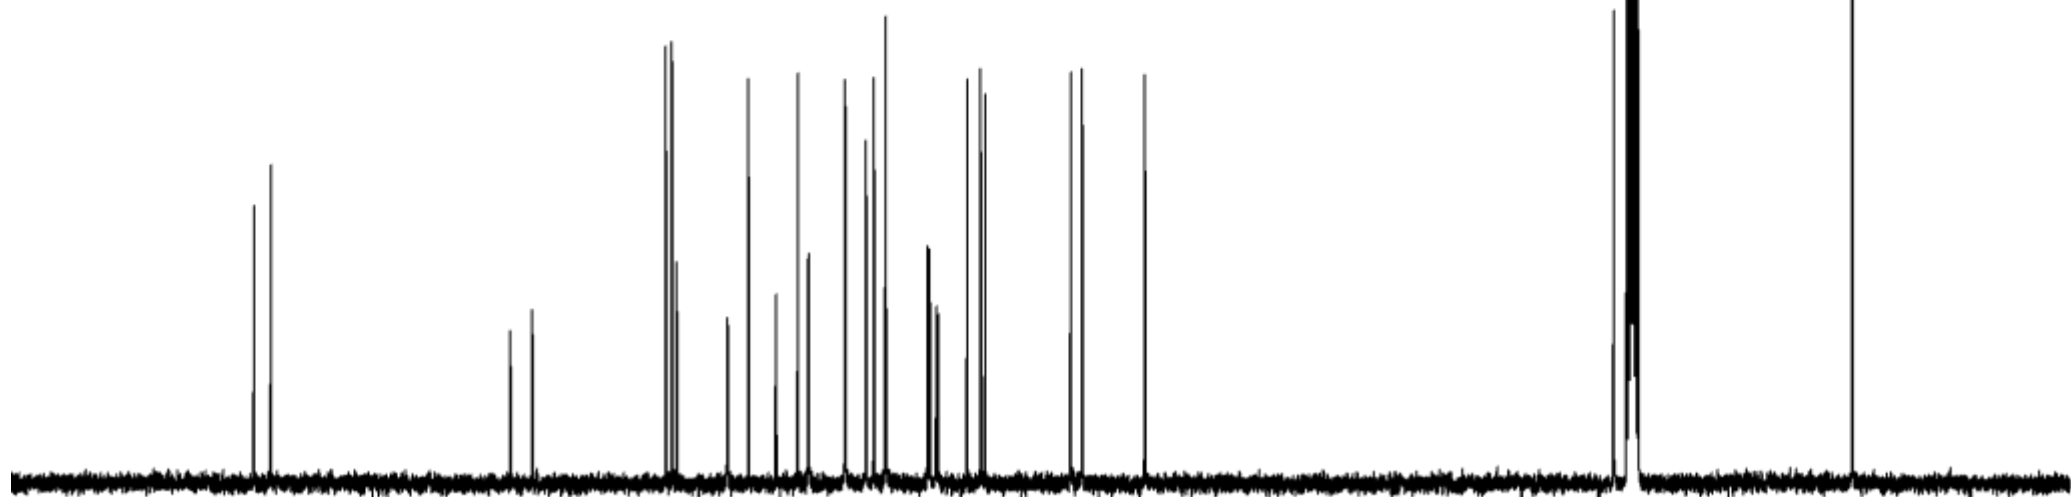

210 200 190 180 170 160 150 140 130 120 110 100 90 80 70 60 50 40 30 20 10 ppm

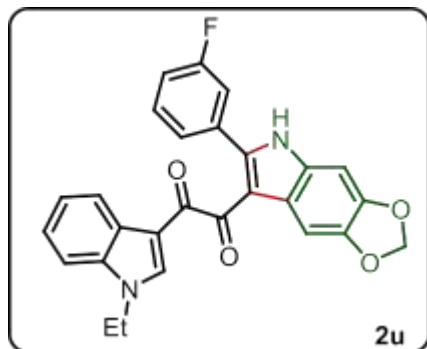

$^{19}\text{F}$ NMR, 376 MHz,  $\text{DMSO-d}_6$

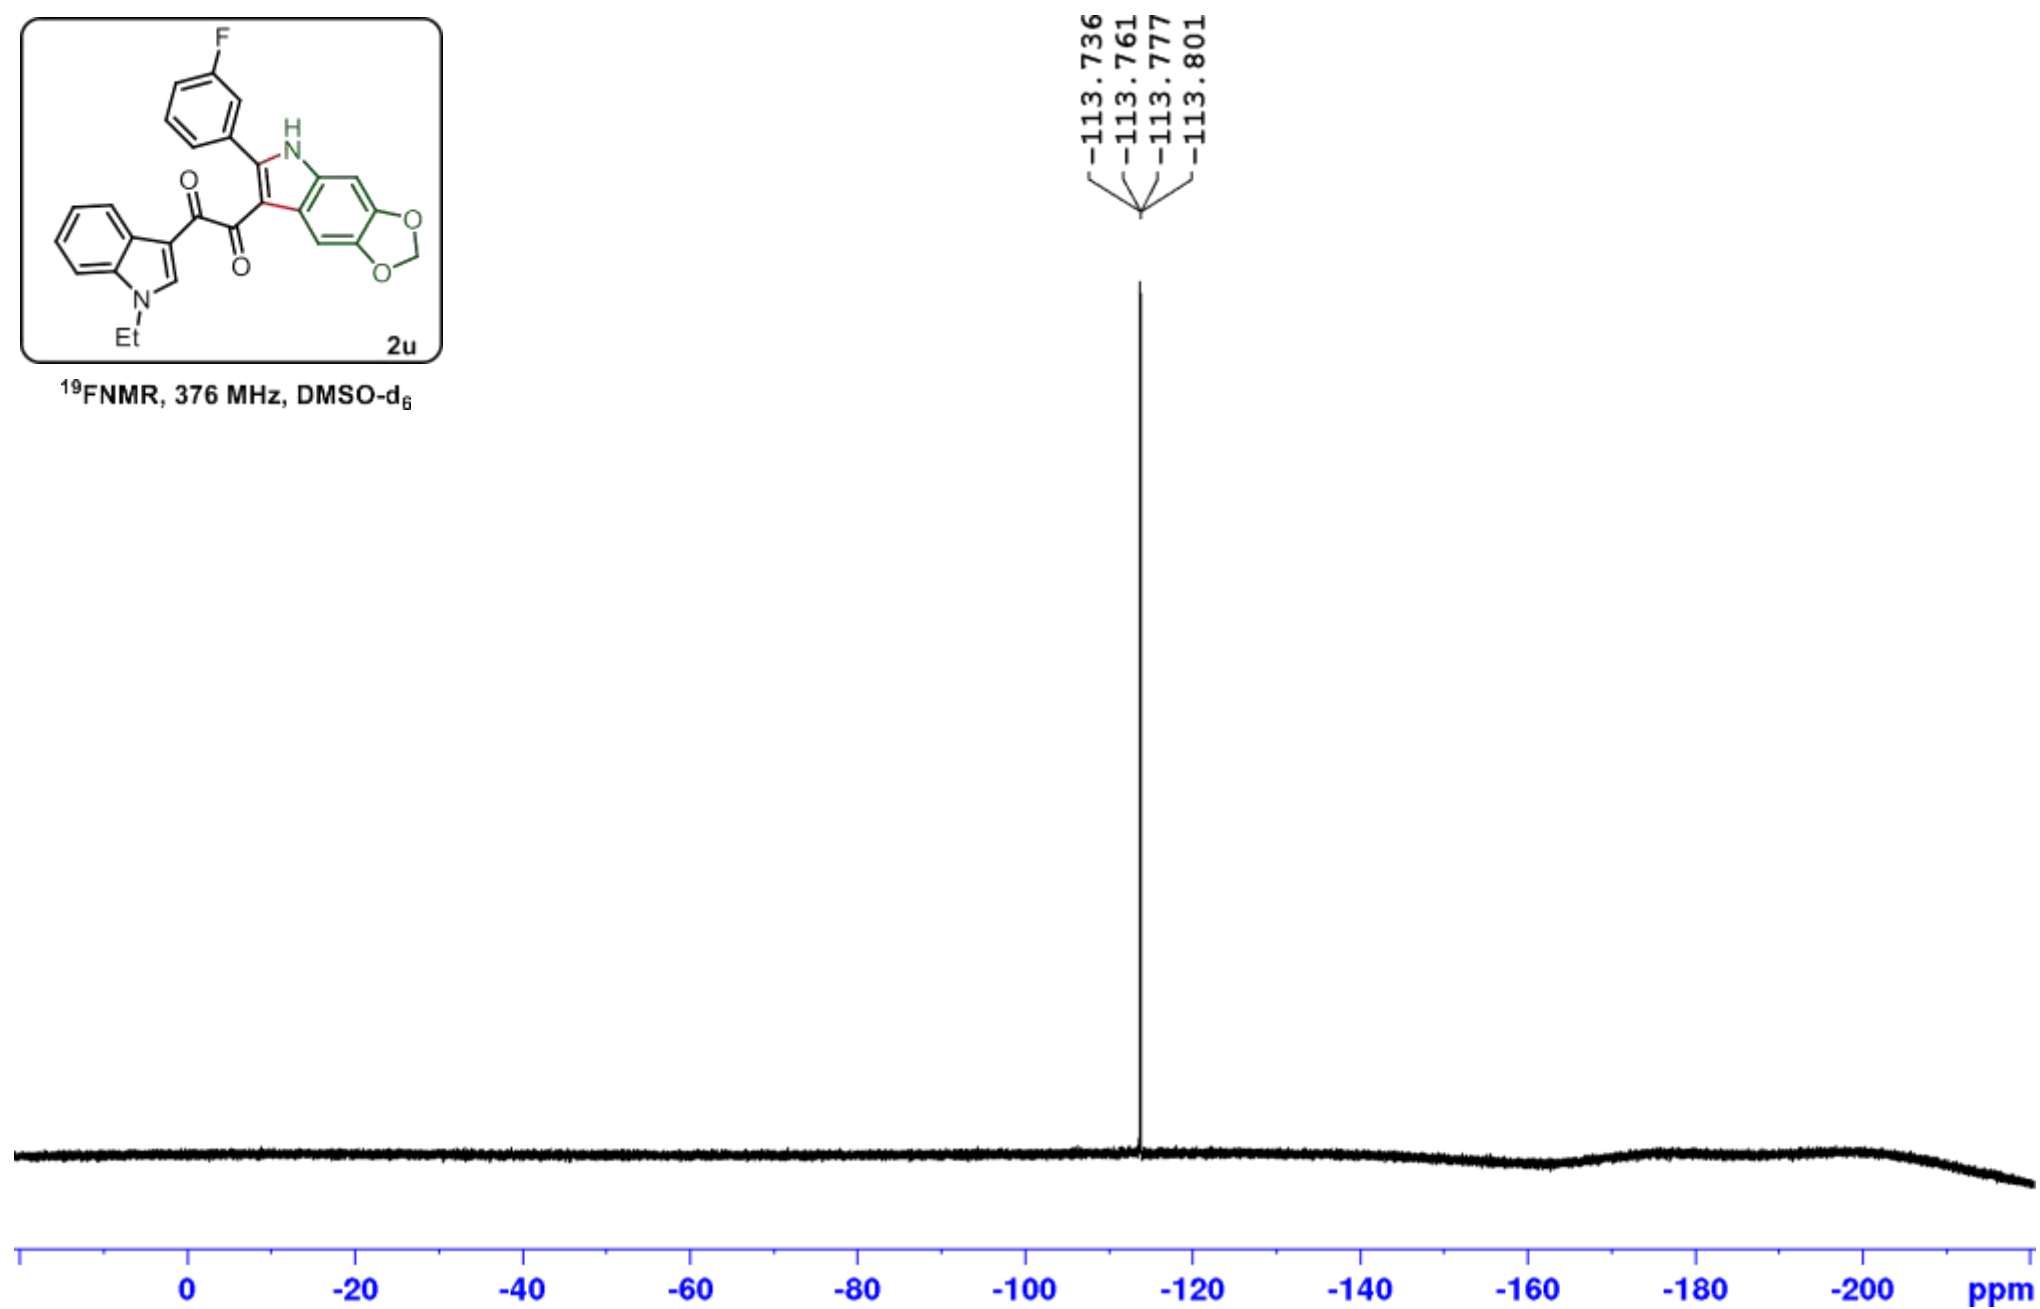

# Elemental Composition Report

## Single Mass Analysis

Tolerance = 50.0 PPM / DBE: min = -1.5, max = 50.0

Element prediction: Off

Number of isotope peaks used for i-FIT = 3

Monoisotopic Mass, Even Electron Ions

43 formula(e) evaluated with 1 results within limits (up to 3 closest results for each mass)

Elements Used:

C: 0-27 H: 0-100 N: 0-2 O: 0-4 F: 0-1

NVD-97

QMI DIVISION, CSIR-IIIM JAMMU  
Xevo G2-XS QTOF YFC2015

11-Oct-2023  
13:25:49  
1: TOF MS ES+  
7.76e+006

111023\_05 6 (0.138)

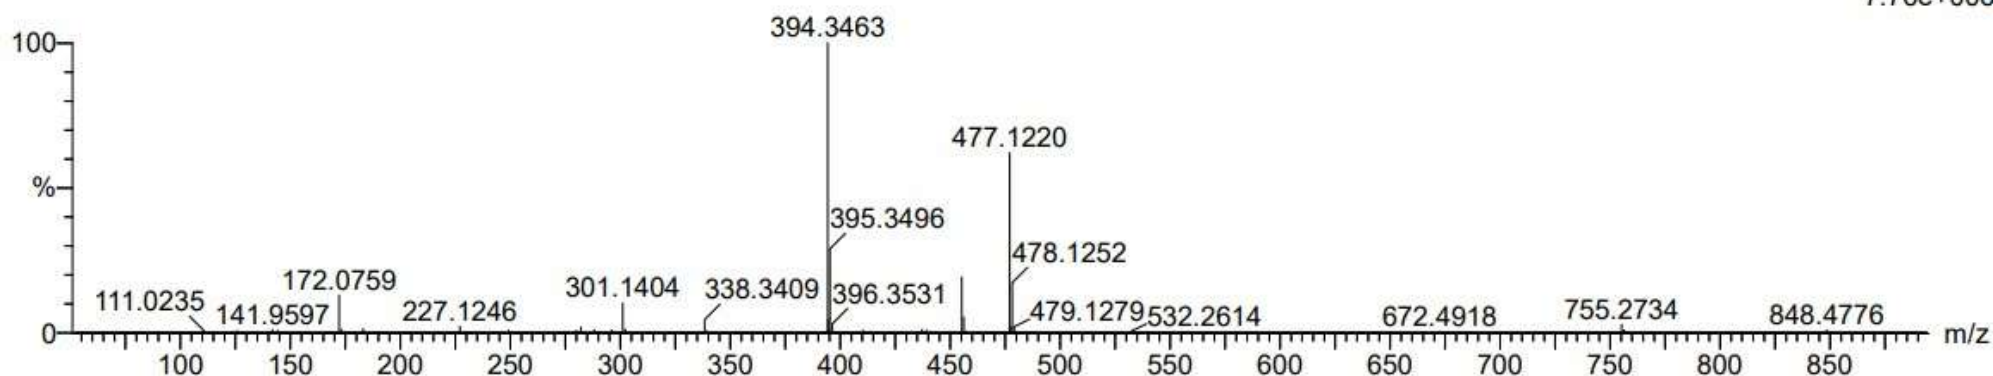

Minimum: -1.5  
Maximum: 2.0 50.0 50.0

| Mass     | Calc. Mass | mDa  | PPM  | DBE  | i-FIT | Norm | Conf (%) | Formula         |
|----------|------------|------|------|------|-------|------|----------|-----------------|
| 455.1400 | 455.1407   | -0.7 | -1.5 | 18.5 | 741.1 | n/a  | n/a      | C27 H20 N2 O4 F |

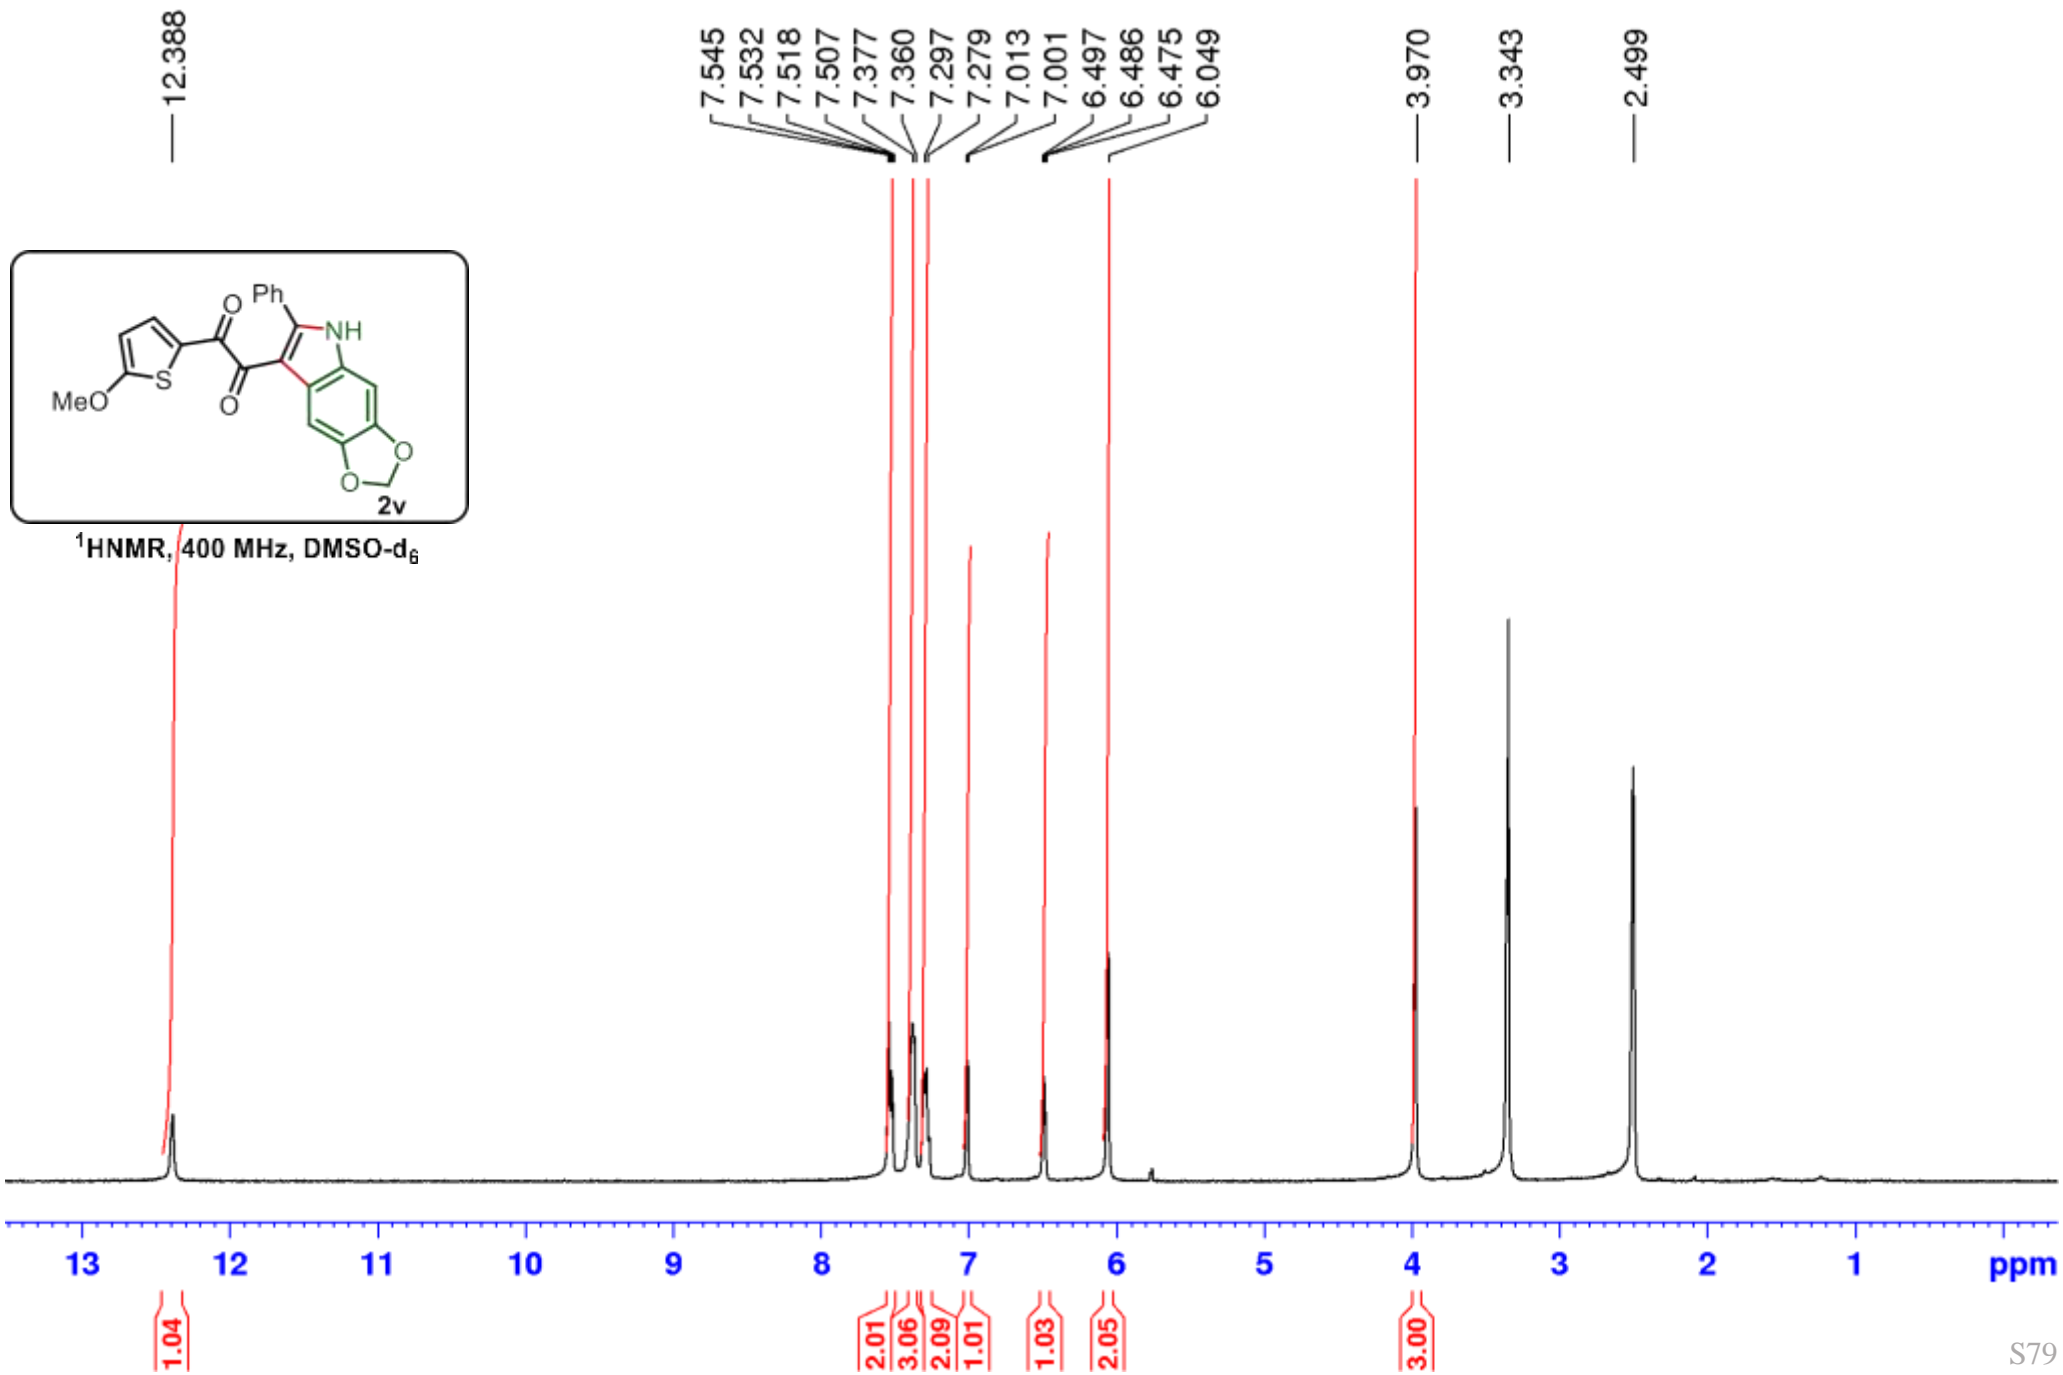

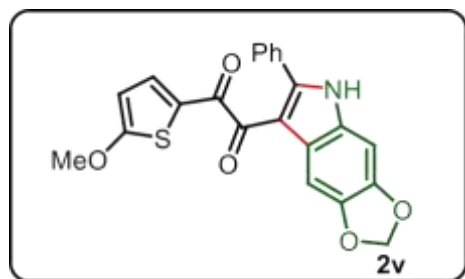

$^{13}\text{C}\{^1\text{H}\}$ NMR, 100 MHz,  $\text{DMSO-d}_6$

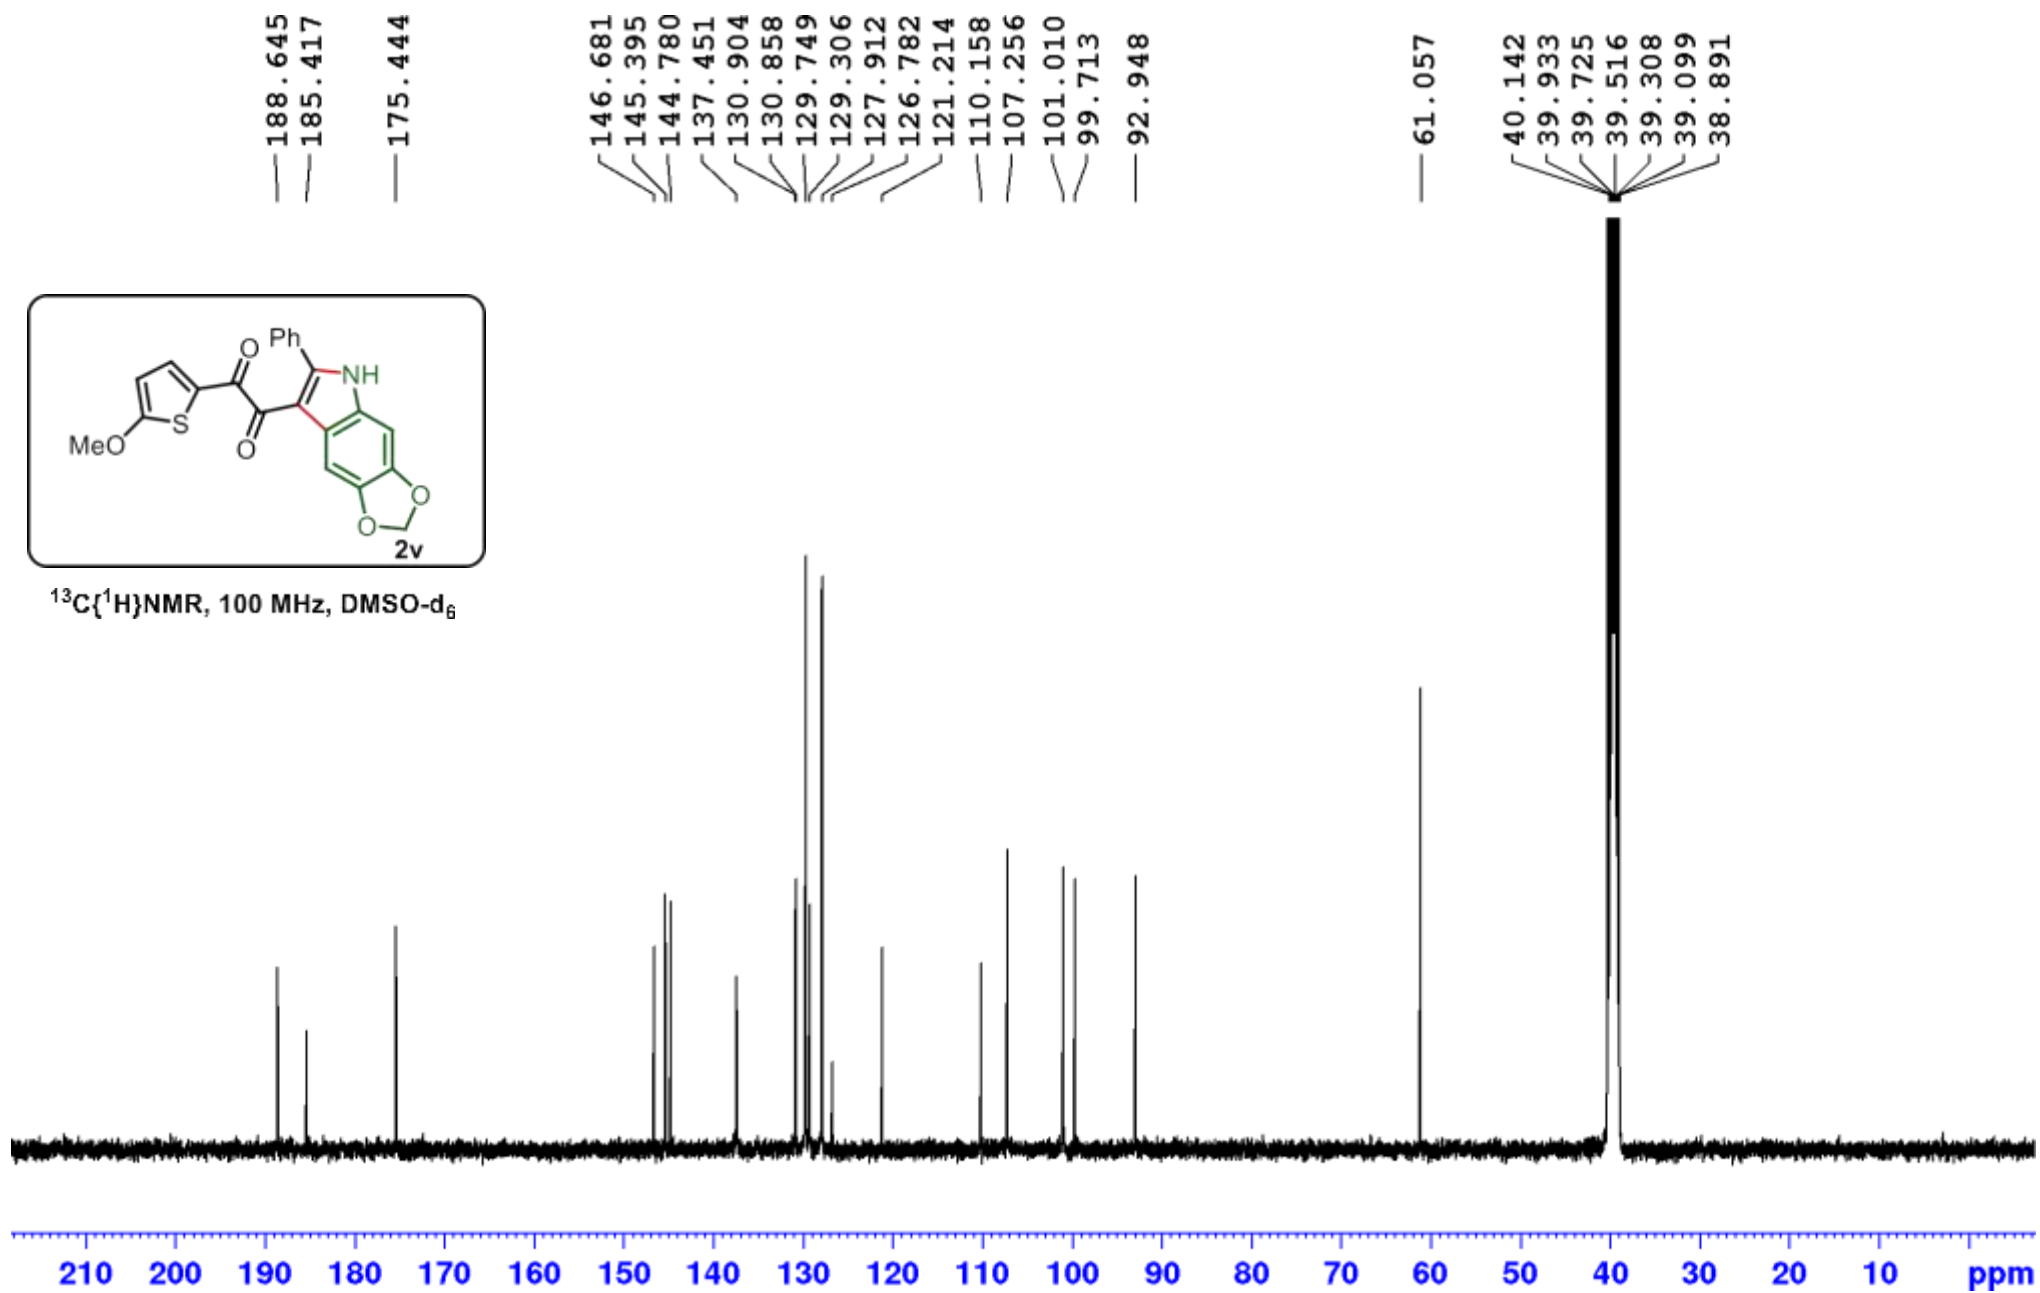



# Elemental Composition Report

## Single Mass Analysis

Tolerance = 10.0 PPM / DBE: min = -1.5, max = 50.0

Element prediction: Off

Number of isotope peaks used for i-FIT = 3

Monoisotopic Mass, Even Electron Ions

28 formula(e) evaluated with 1 results within limits (up to 3 closest results for each mass)

Elements Used:

C: 0-22 H: 0-100 N: 0-1 O: 0-5 S: 0-1

NVD-116

QMI DIVISION, CSIR-IIIM JAMMU  
Xevo G2-XS QTOF YFC2015

04-Mar-2024

13:39:05

1: TOF MS ES+

4.51e+006

040324\_11 5 (0.121)

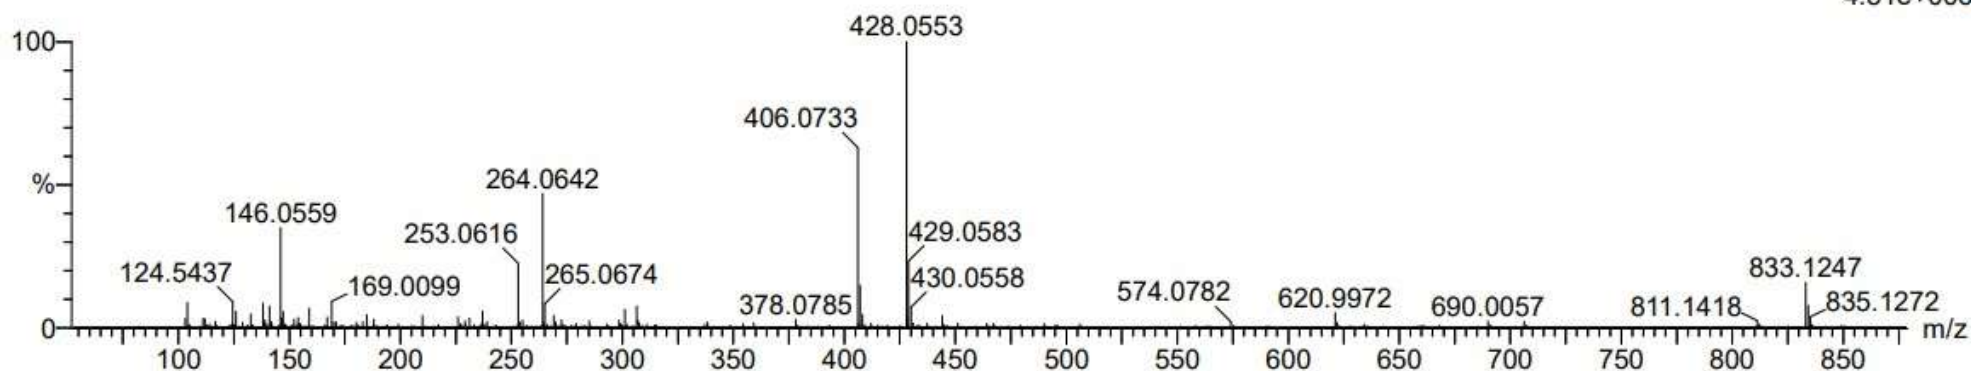

Minimum: -1.5  
Maximum: 2.0 10.0 50.0

| Mass     | Calc. Mass | mDa  | PPM  | DBE  | i-FIT  | Norm | Conf(%) | Formula        |
|----------|------------|------|------|------|--------|------|---------|----------------|
| 406.0733 | 406.0749   | -1.6 | -3.9 | 15.5 | 1036.7 | n/a  | n/a     | C22 H16 N O5 S |

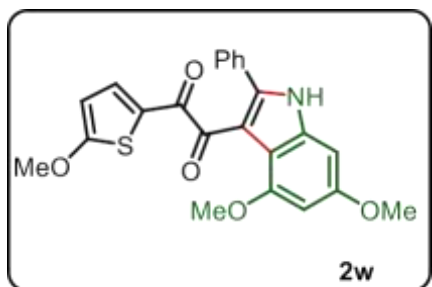

<sup>1</sup>HNMR, 400 MHz, DMSO-d<sub>6</sub>

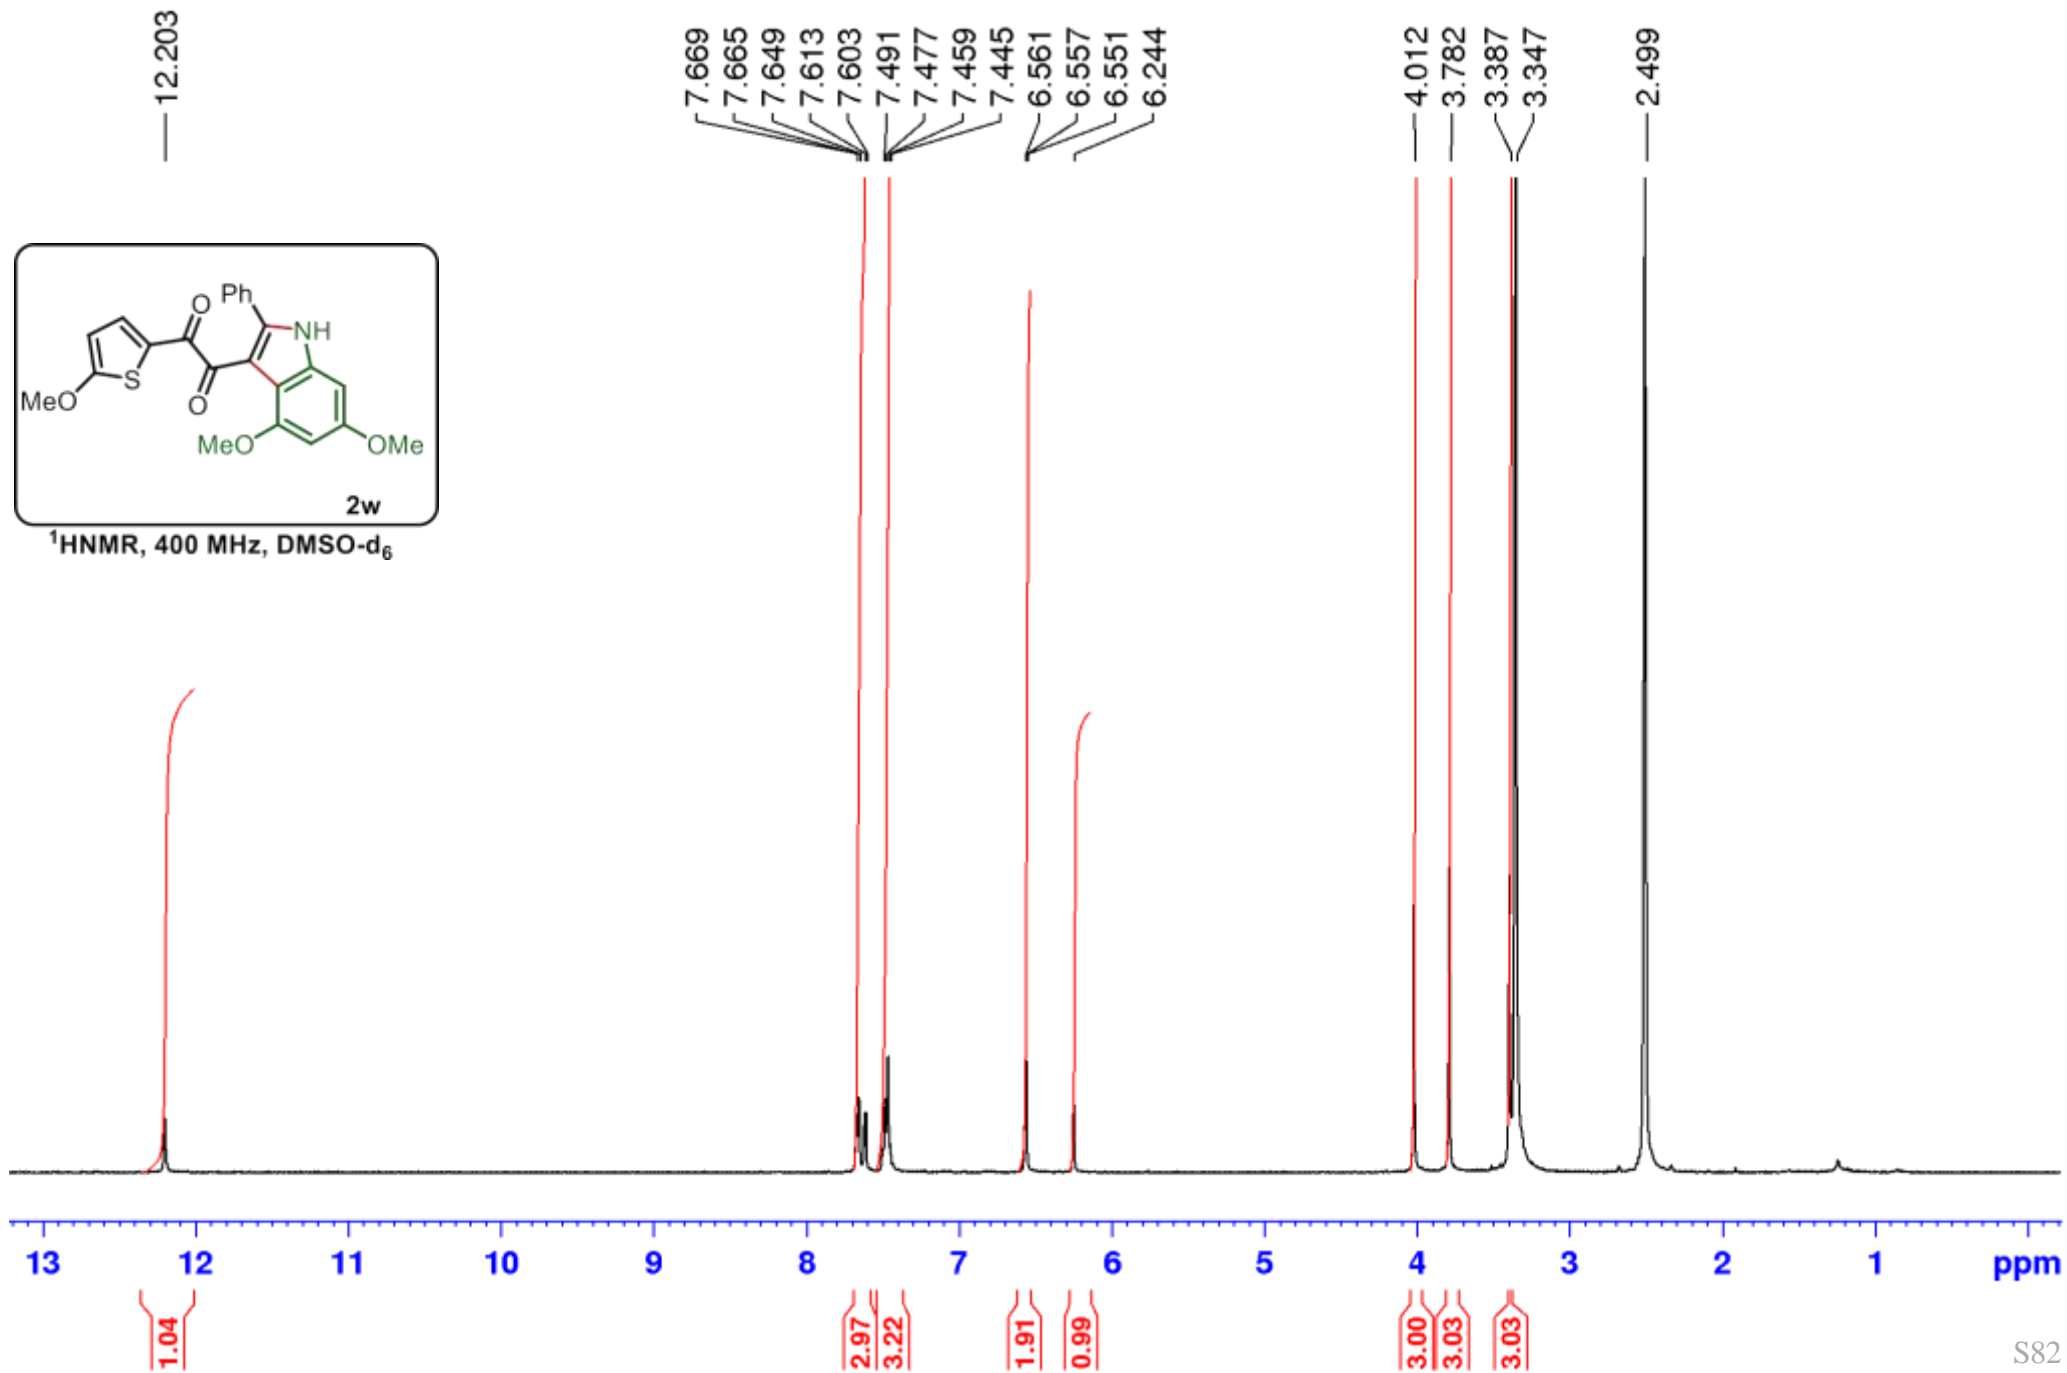

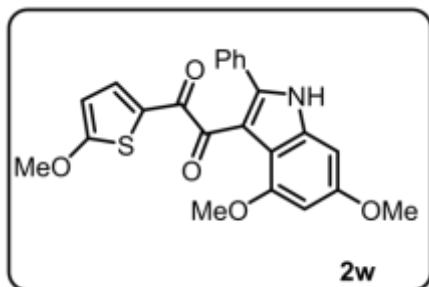

$^{13}\text{C}\{^1\text{H}\}$ NMR, 100 MHz,  $\text{CDCl}_3$

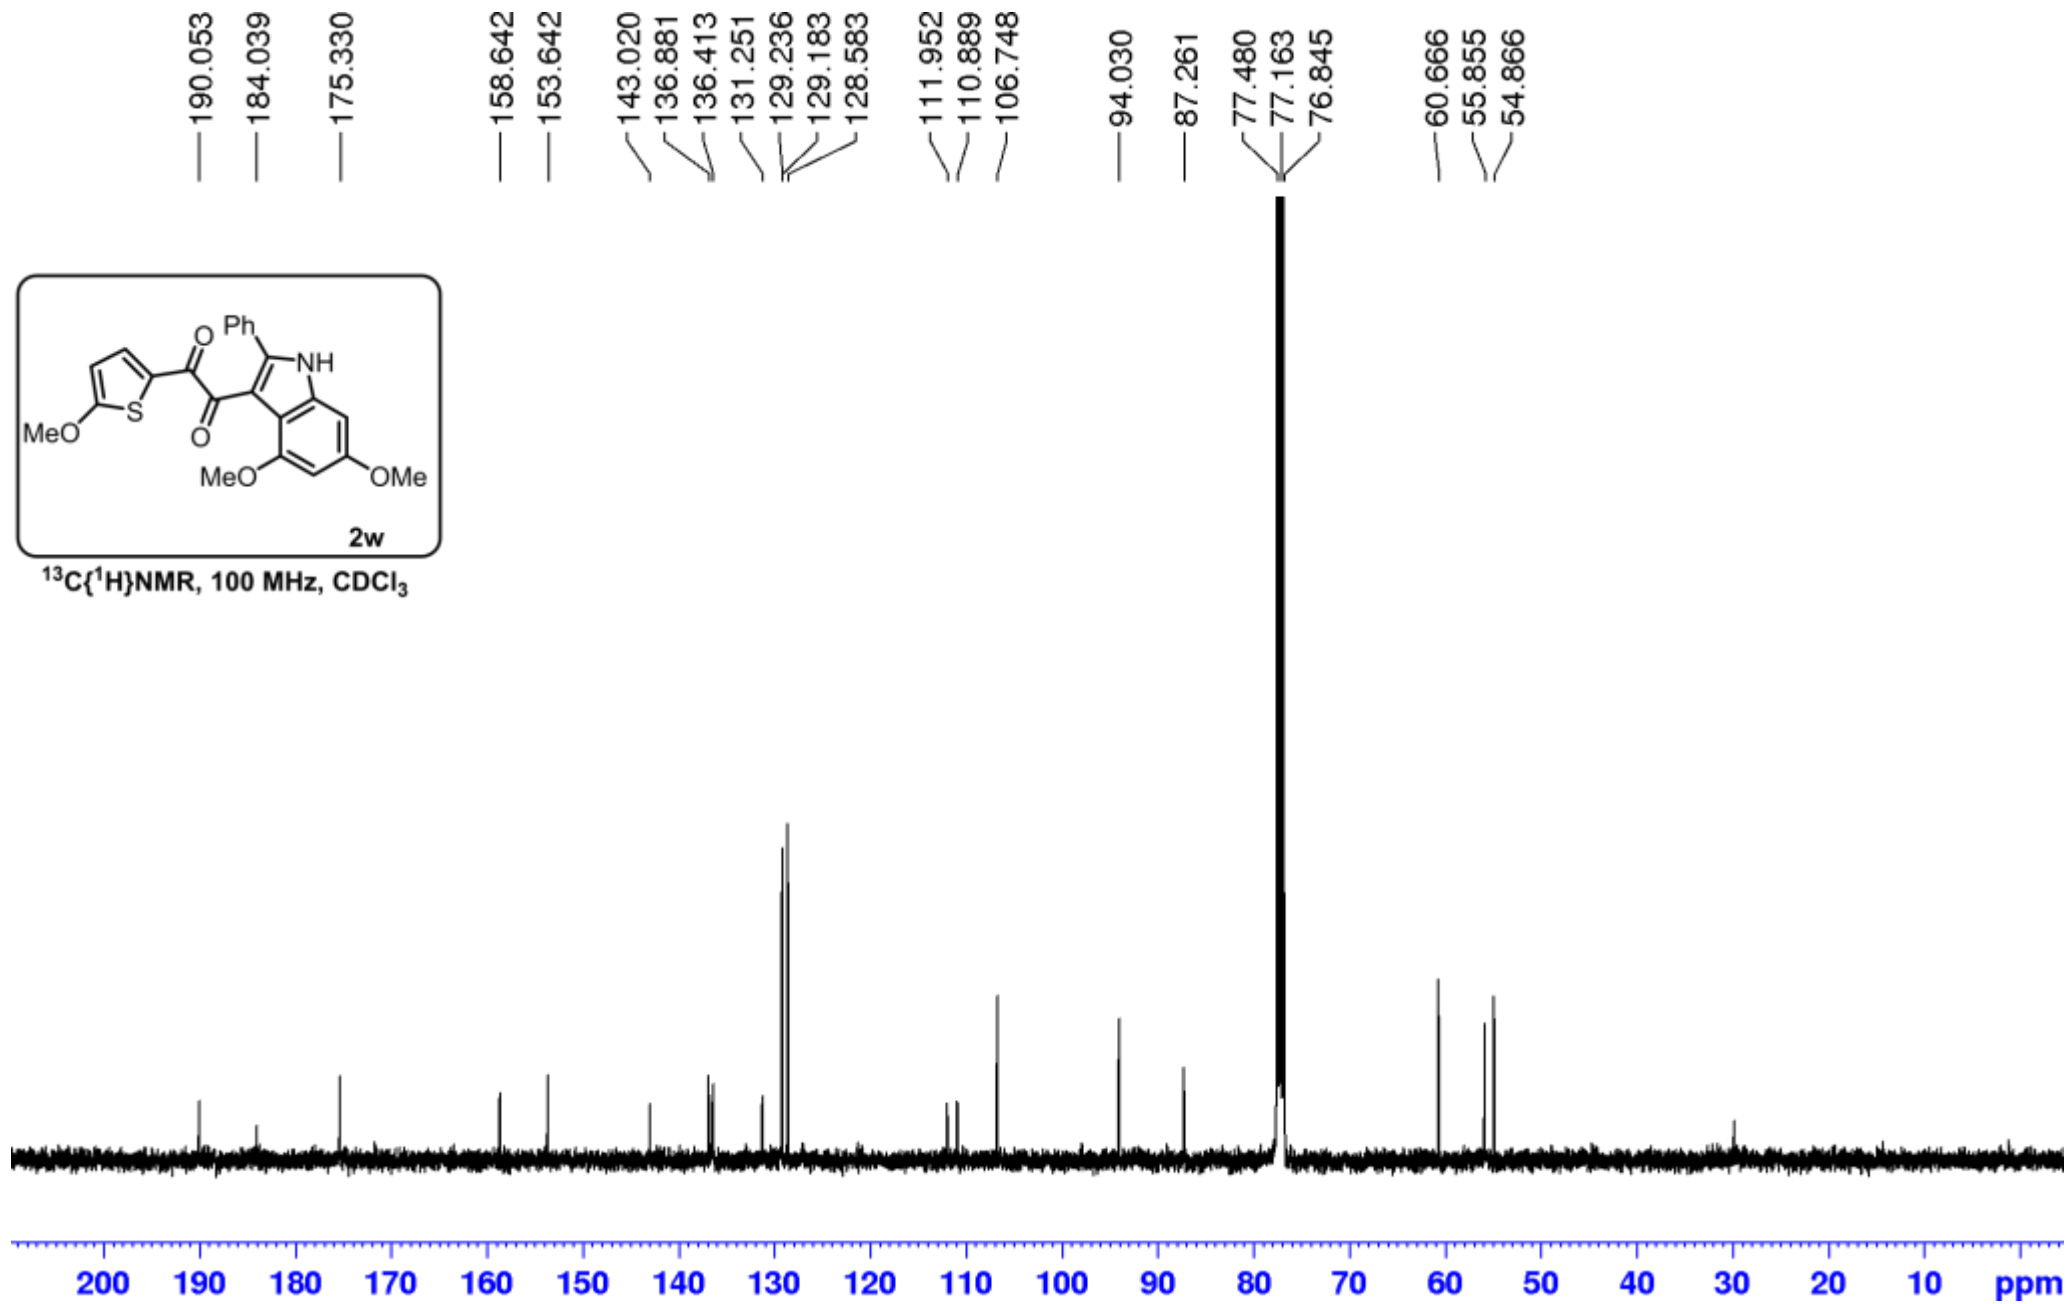

# Elemental Composition Report

## Single Mass Analysis

Tolerance = 10.0 PPM / DBE: min = -1.5, max = 50.0

Element prediction: Off

Number of isotope peaks used for i-FIT = 3

Monoisotopic Mass, Even Electron Ions

28 formula(e) evaluated with 1 results within limits (up to 3 closest results for each mass)

Elements Used:

C: 0-23 H: 0-100 N: 0-1 O: 0-5 S: 0-1

NVD-117

QMI DIVISION, CSIR-IIIM JAMMU  
Xevo G2-XS QTOF YFC2015

04-Mar-2024

13:33:57

1: TOF MS ES+

2.89e+006

040324\_09 6 (0.138)

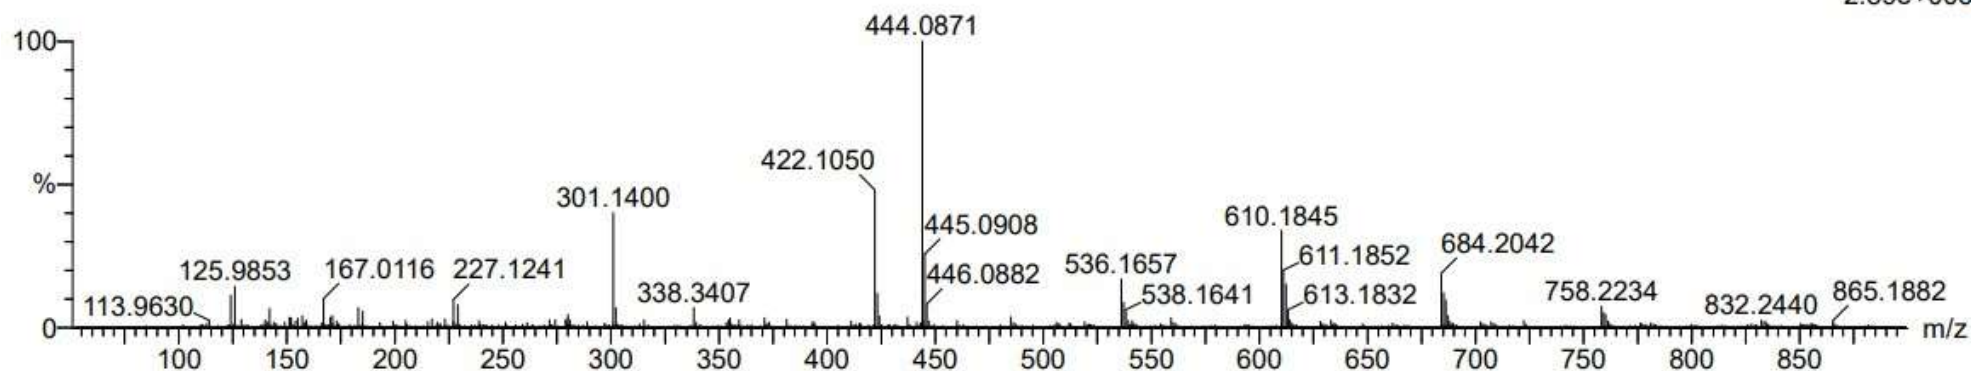

Minimum: -1.5  
Maximum: 2.0 10.0 50.0

| Mass     | Calc. Mass | mDa  | PPM  | DBE  | i-FIT  | Norm | Conf (%) | Formula        |
|----------|------------|------|------|------|--------|------|----------|----------------|
| 422.1050 | 422.1062   | -1.2 | -2.8 | 14.5 | 1092.4 | n/a  | n/a      | C23 H20 N O5 S |

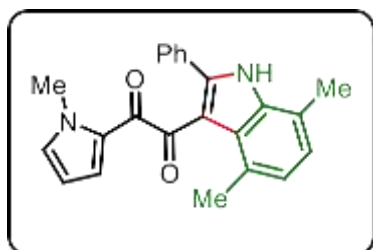

$^1\text{H NMR}$ , 400 MHz,  $\text{DMSO-d}_6$

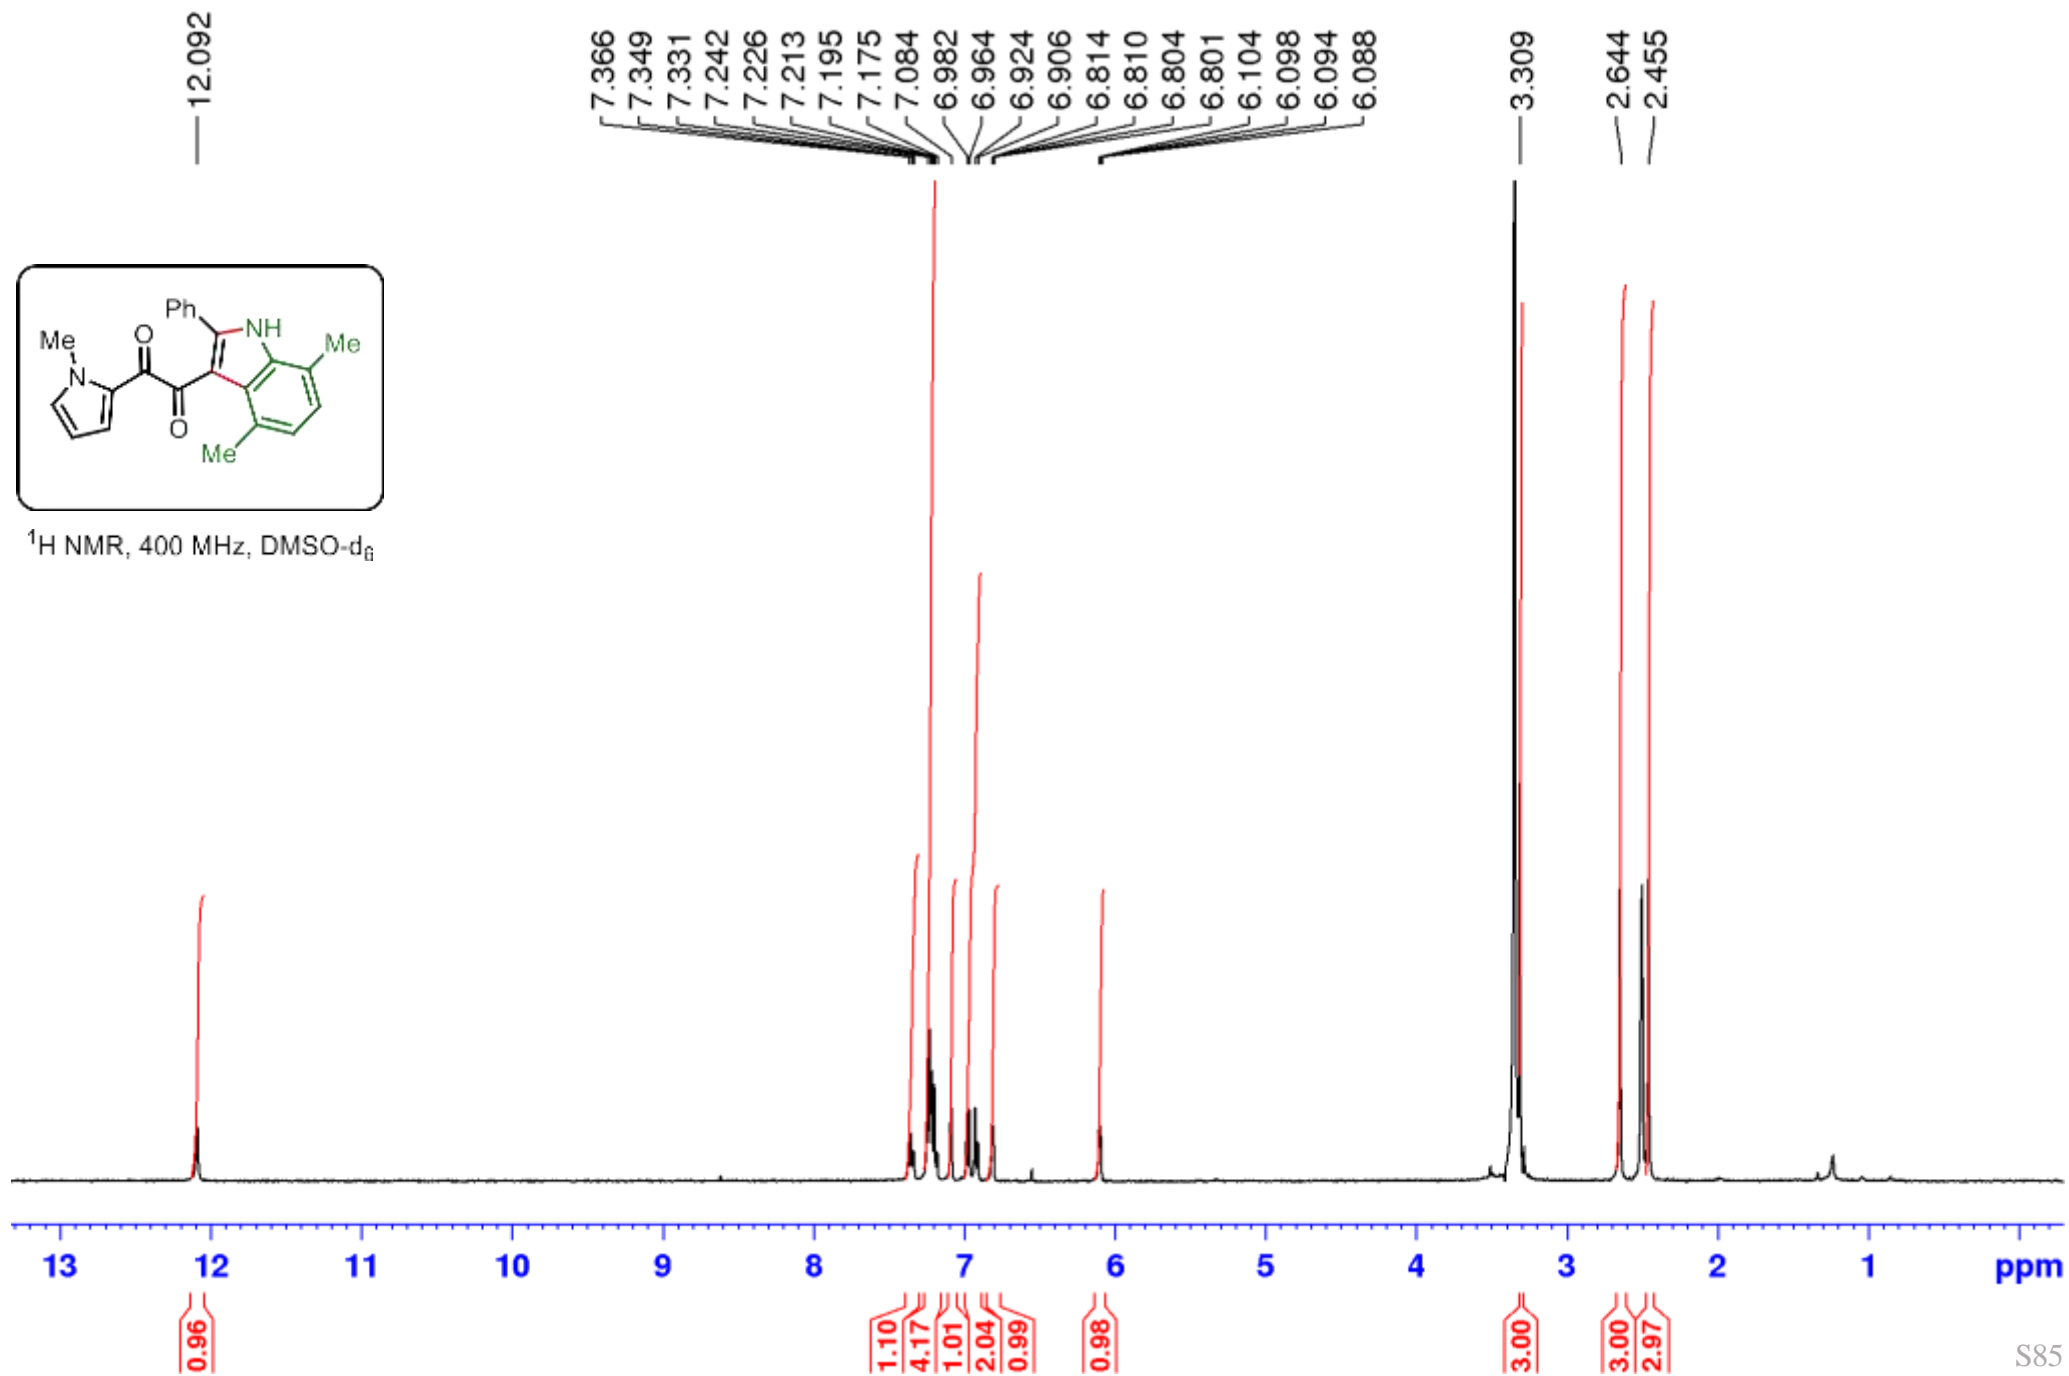

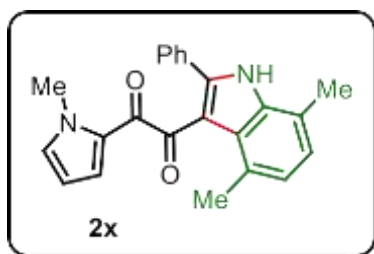

$^{13}\text{C}\{^1\text{H}\}$  NMR, 100 MHz,  $\text{DMSO-d}_6$

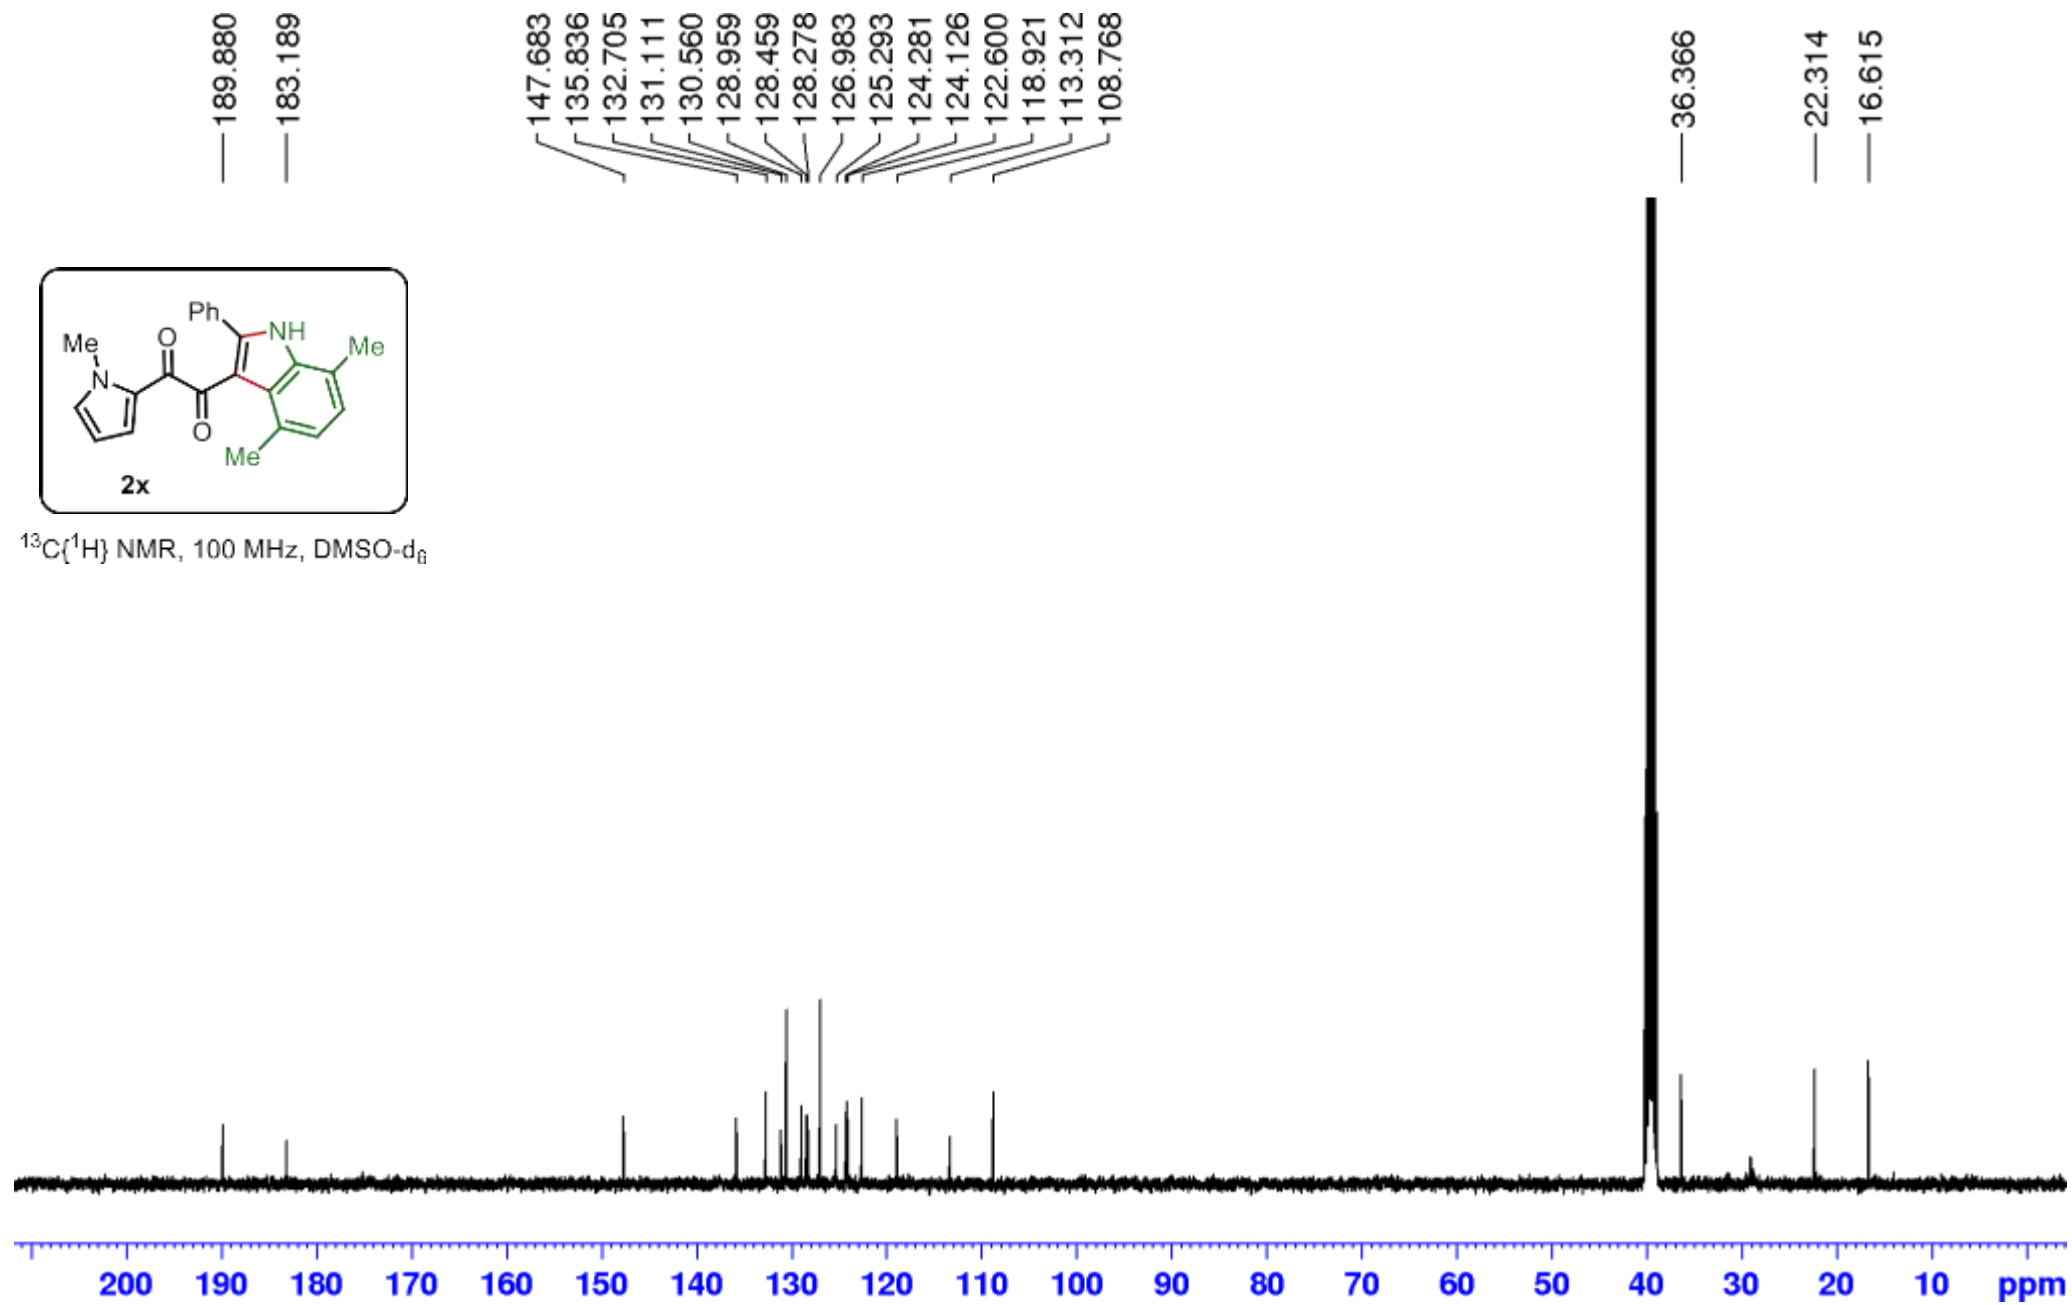

# Elemental Composition Report

## Single Mass Analysis

Tolerance = 20.0 PPM / DBE: min = -1.5, max = 50.0

Element prediction: Off

Number of isotope peaks used for i-FIT = 3

Monoisotopic Mass, Even Electron Ions

13 formula(e) evaluated with 1 results within limits (up to 3 closest results for each mass)

Elements Used:

C: 0-23 H: 0-100 N: 0-2 O: 0-2

NVD/B-16

QMI DIVISION, CSIR-IIIM JAMMU  
Xevo G2-XS QTOF YFC2015

15-Jul-2024

14:51:53

1: TOF MS ES-  
7.46e+005

150724\_13 5 (0.121)

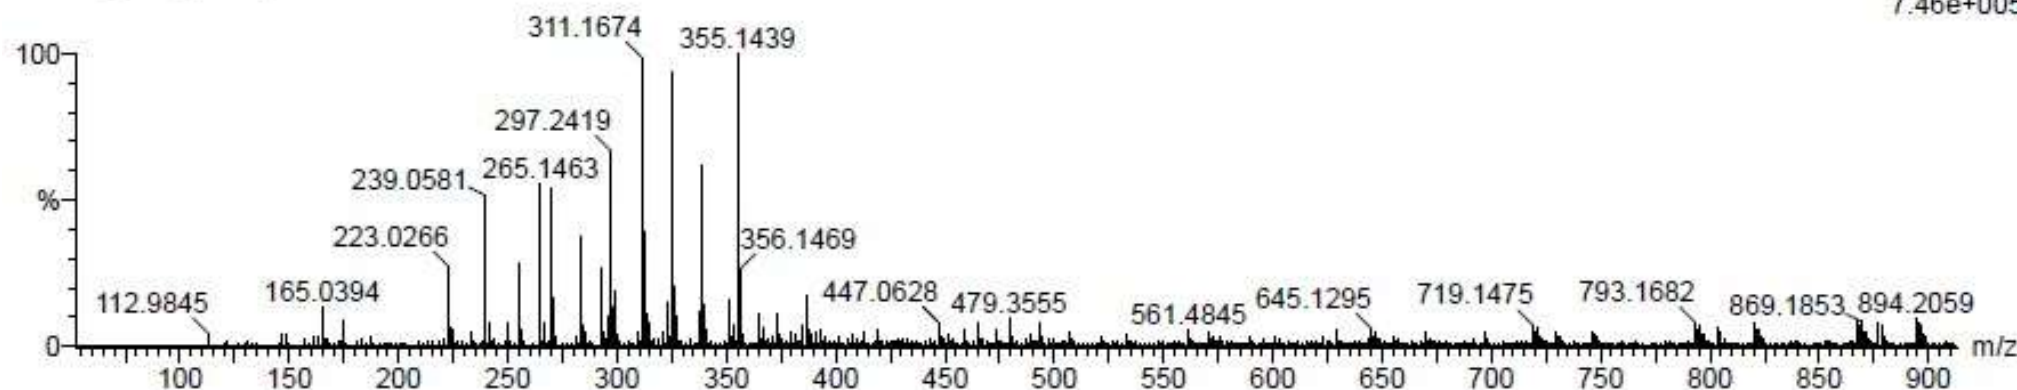

Minimum: -1.5  
Maximum: 2.0 20.0 50.0

| Mass     | Calc. Mass | mDa  | PPM  | DBE  | i-FIT  | Norm | Conf (%) | Formula       |
|----------|------------|------|------|------|--------|------|----------|---------------|
| 355.1439 | 355.1447   | -0.8 | -2.3 | 15.5 | 1190.6 | n/a  | n/a      | C23 H19 N2 O2 |

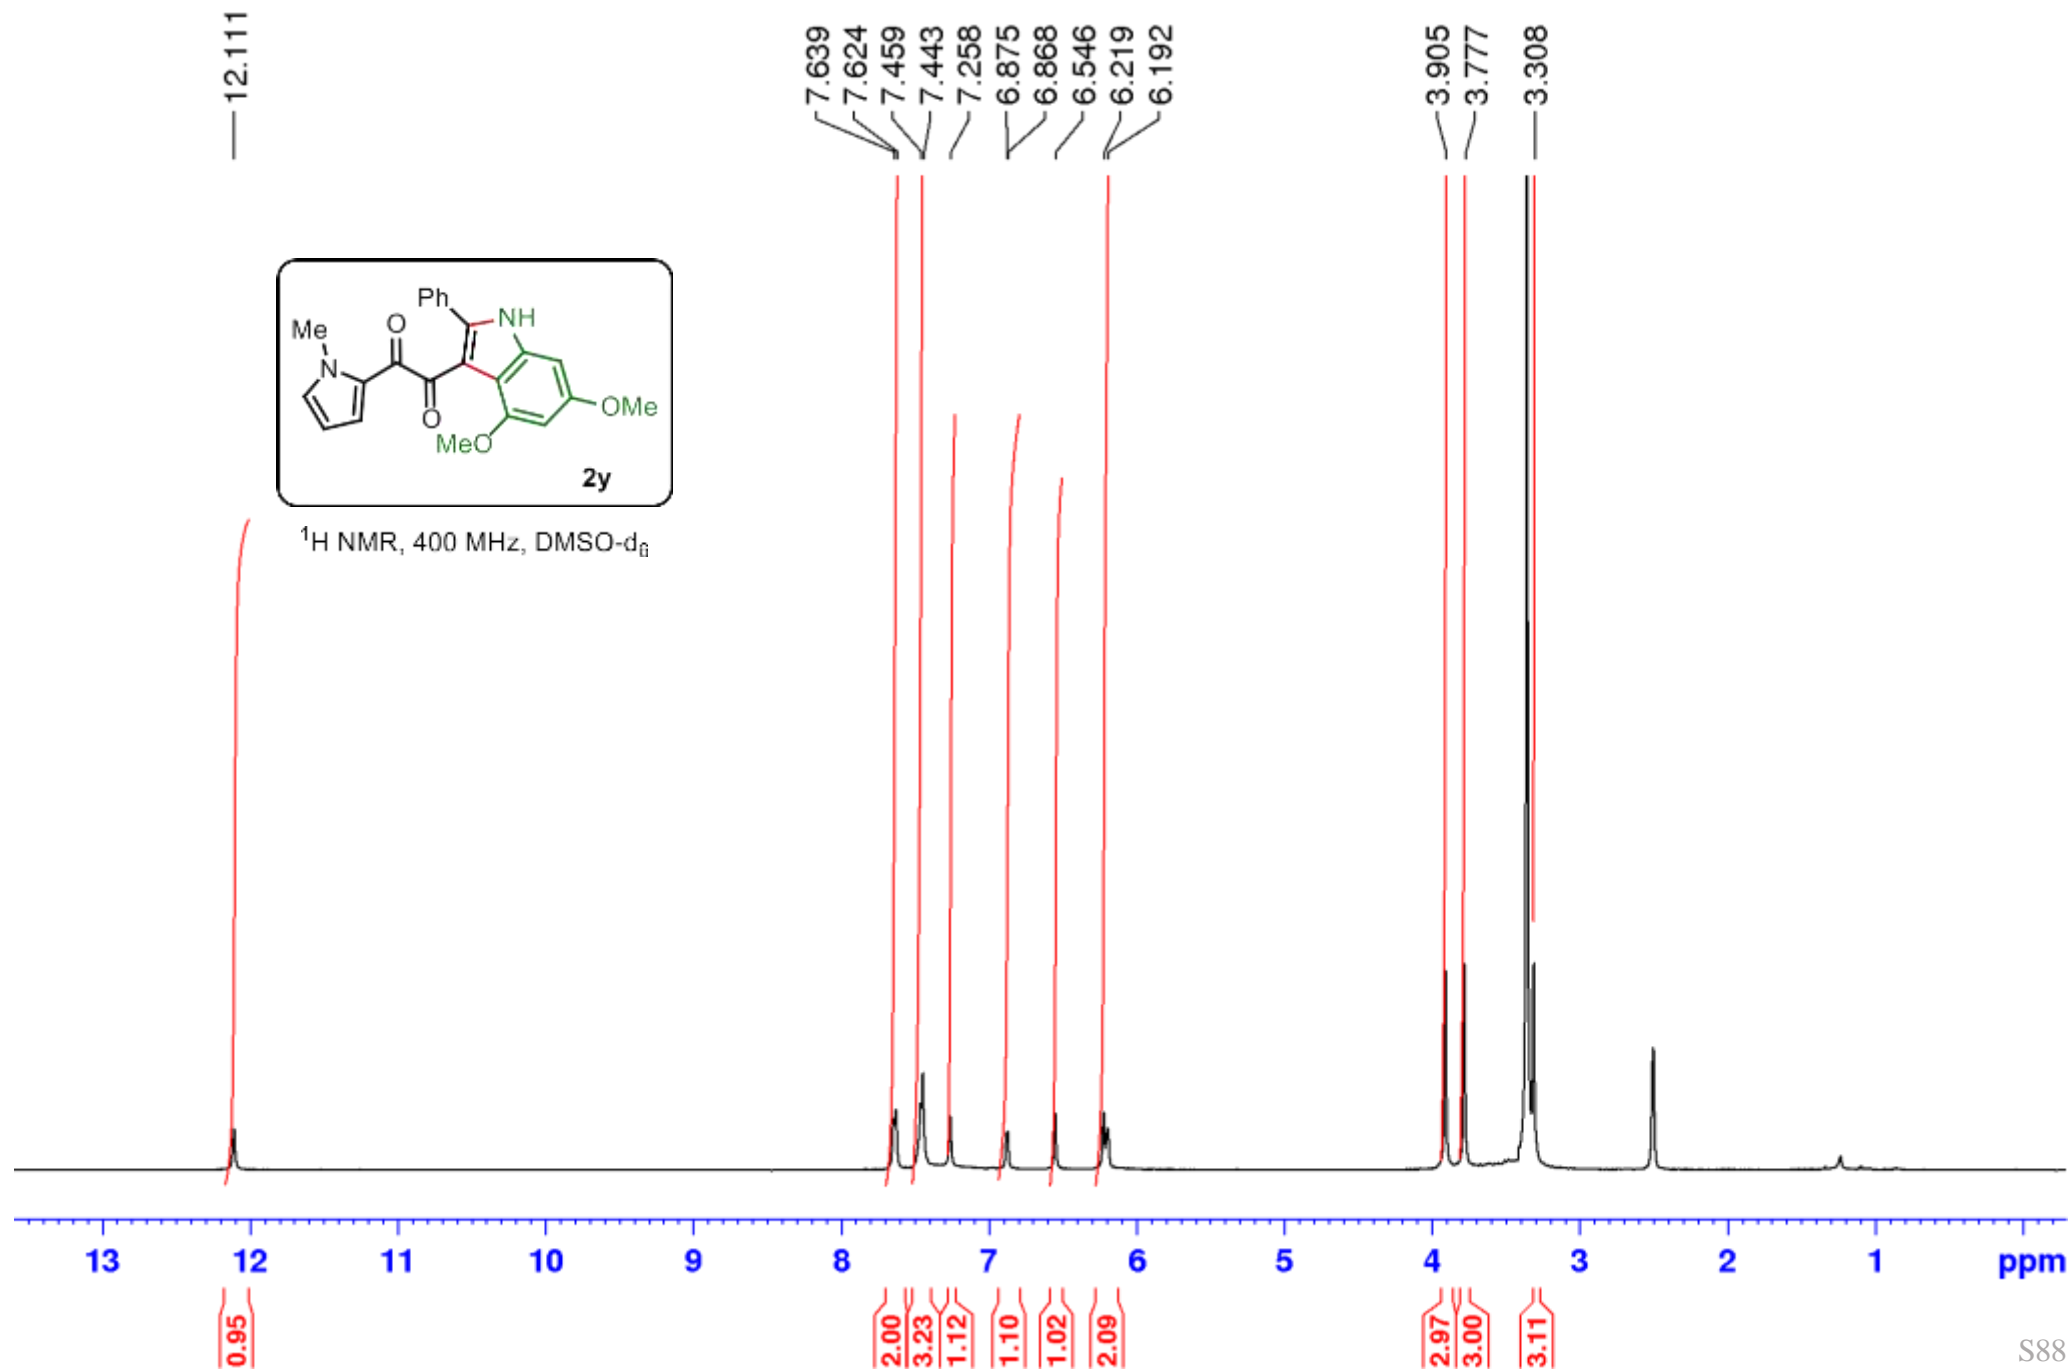



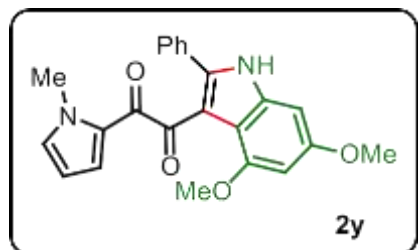

$^{13}\text{C}\{^1\text{H}\}$  NMR, 100 MHz,  $\text{DMSO-d}_6$

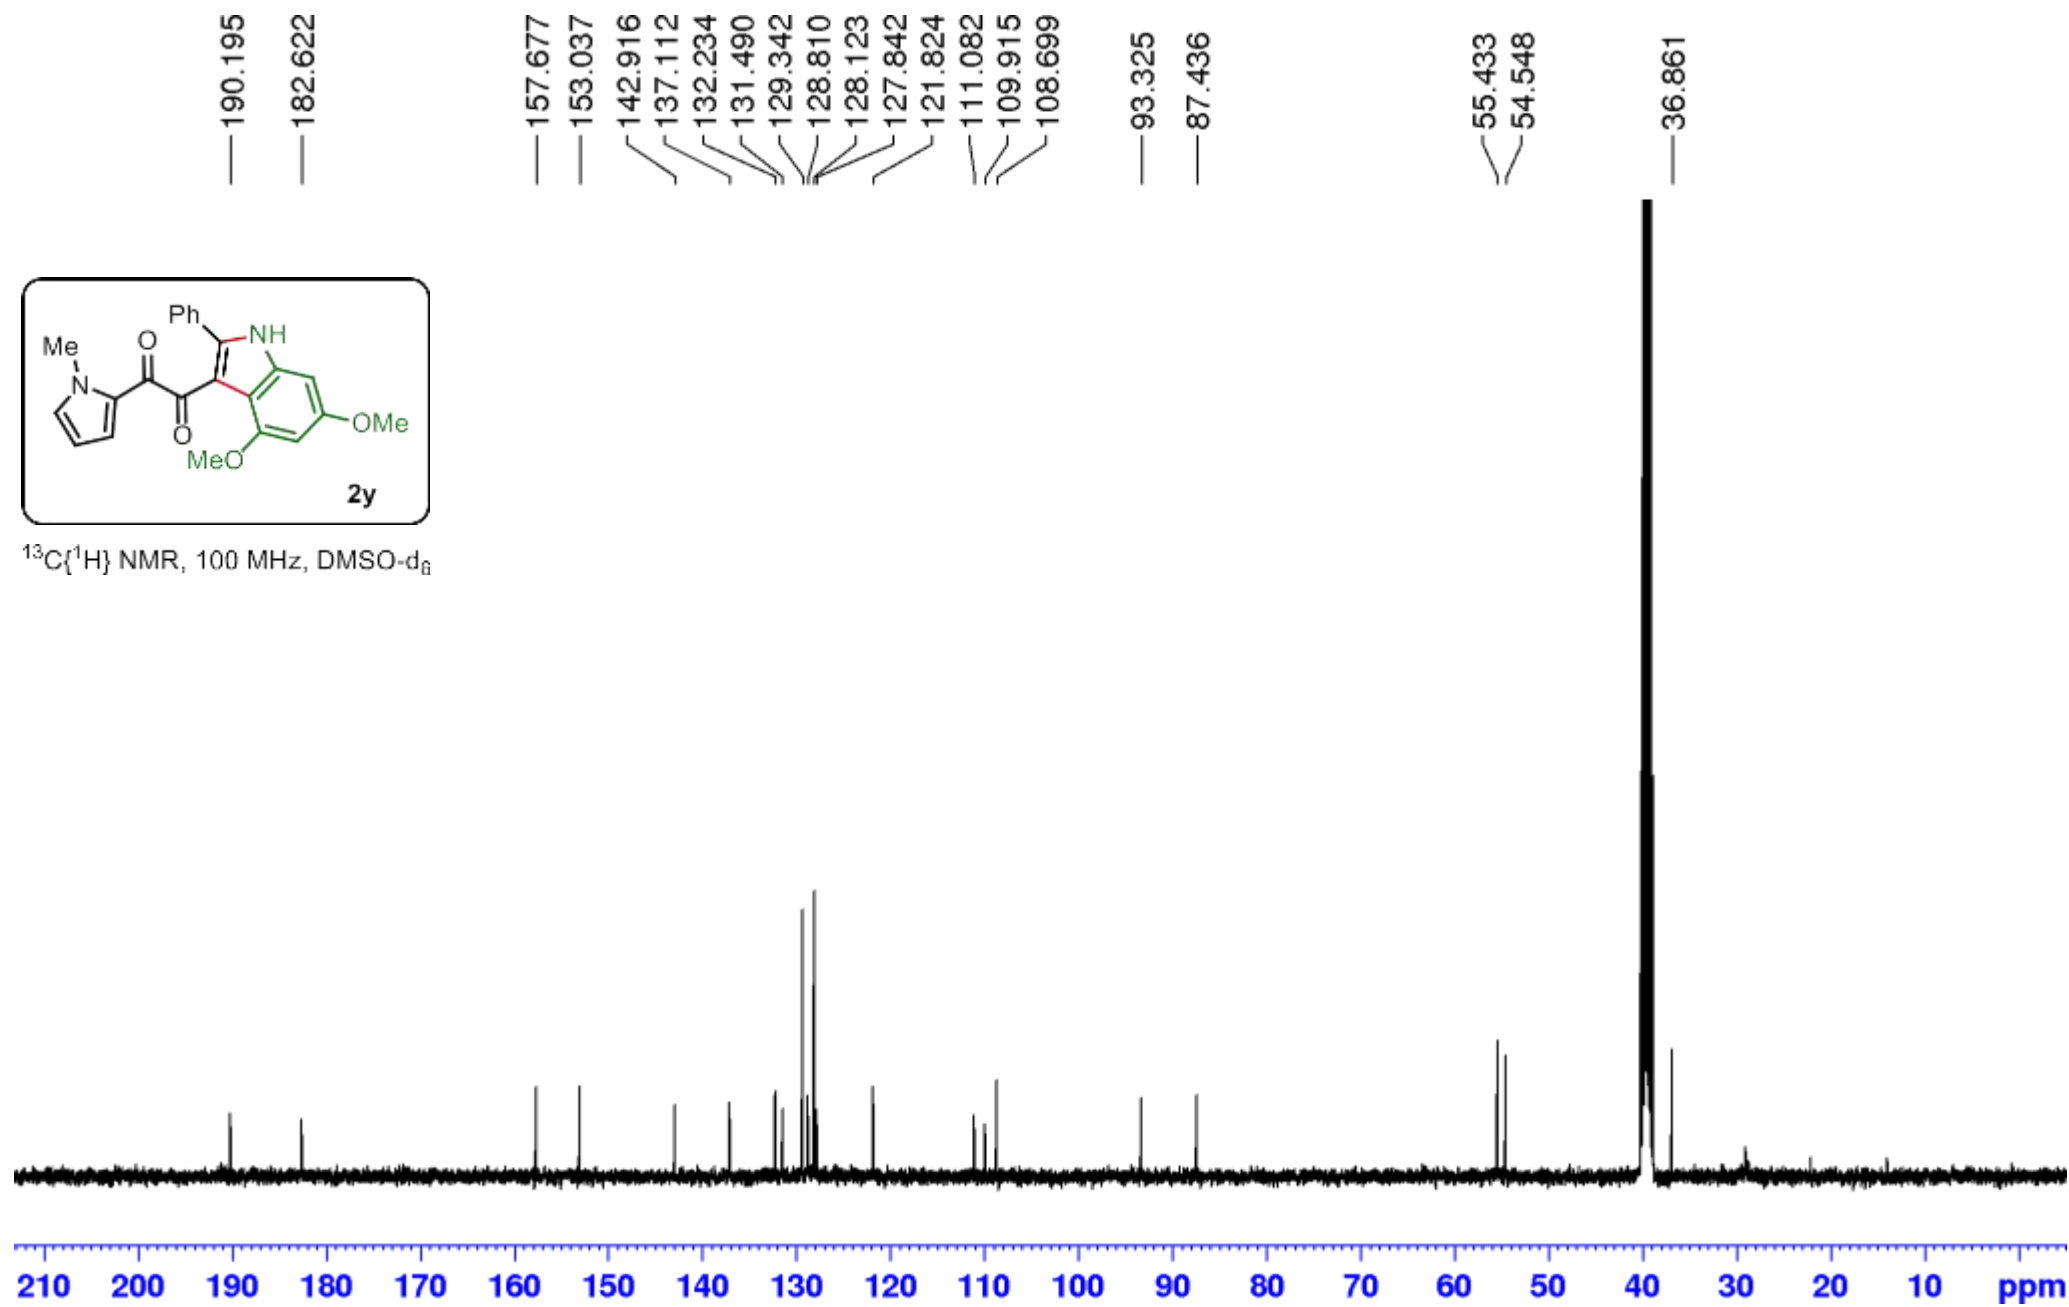

Single Mass Analysis

Tolerance = 20.0 PPM / DBE: min = -1.5, max = 50.0

Element prediction: Off

Number of isotope peaks used for i-FIT = 3

Monoisotopic Mass, Even Electron Ions

19 formula(e) evaluated with 1 results within limits (up to 3 closest results for each mass)

Elements Used:

C: 0-23 H: 0-100 N: 0-2 O: 0-4

NVD/B-15

QMI DIVISION, CSIR-IIIM JAMMU  
Xevo G2-XS QTOF YFC2015

15-Jul-2024  
14:54:37  
1: TOF MS ES-  
9.99e+006

150724\_14 6 (0.138)

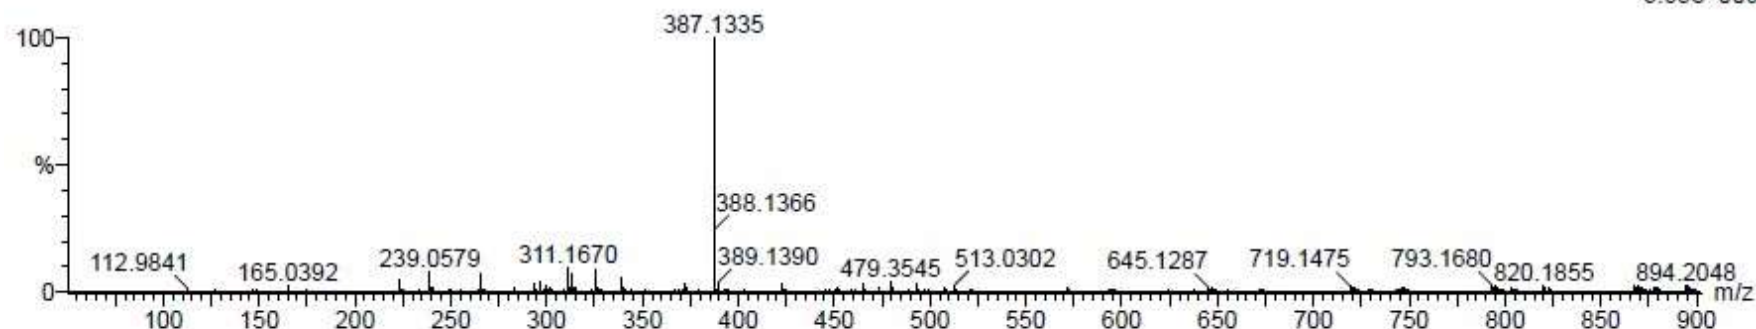

Minimum: -1.5  
Maximum: 2.0 20.0 50.0

| Mass     | Calc. Mass | mDa  | PPM  | DBE  | i-FIT  | Norm | Conf (%) | Formula       |
|----------|------------|------|------|------|--------|------|----------|---------------|
| 387.1335 | 387.1345   | -1.0 | -2.6 | 15.5 | 1166.9 | n/a  | n/a      | C23 H19 N2 O4 |
